# Supplementary material for: Endophytic Bacterium Serratia plymuthica From Chinese Leek Suppressed Apple Ring Rot on Postharvest Apple Fruit
Source: Front Microbiol. 2022 Mar 3;12:802887. doi: 10.3389/fmicb.2021.802887 (PMC8929176; doi:10.3389/fmicb.2021.802887)
Supplement: Supplementary file 2 [file Table_2.xlsx]

## Sheet: 6h
supplementary Table S2 GO analysis of DGEs screed at 6h time pionts
GO.ID	Category	Term	Up	Down	DEG	Total	Pvalue	adjustPvalue	Up_gene	Down_gene
GO:0055114	BP	oxidation-reduction process	32	84	116	1296	1.4092e-11	6.90507e-09	gene-GTA08_BOTSDO00398(GTA08_BOTSDO00398);gene-GTA08_BOTSDO01755(GTA08_BOTSDO01755);gene-GTA08_BOTSDO02023(GTA08_BOTSDO02023);gene-GTA08_BOTSDO03164(GTA08_BOTSDO03164);gene-GTA08_BOTSDO03718(GTA08_BOTSDO03718);gene-GTA08_BOTSDO04104(GTA08_BOTSDO04104);gene-GTA08_BOTSDO04504(GTA08_BOTSDO04504);gene-GTA08_BOTSDO04923(GTA08_BOTSDO04923);gene-GTA08_BOTSDO05313(GTA08_BOTSDO05313);gene-GTA08_BOTSDO0542…	gene-GTA08_BOTSDO00341(GTA08_BOTSDO00341);gene-GTA08_BOTSDO00371(GTA08_BOTSDO00371);gene-GTA08_BOTSDO00382(GTA08_BOTSDO00382);gene-GTA08_BOTSDO00477(GTA08_BOTSDO00477);gene-GTA08_BOTSDO00551(GTA08_BOTSDO00551);gene-GTA08_BOTSDO00783(GTA08_BOTSDO00783);gene-GTA08_BOTSDO00887(GTA08_BOTSDO00887);gene-GTA08_BOTSDO01347(GTA08_BOTSDO01347);gene-GTA08_BOTSDO01414(GTA08_BOTSDO01414);gene-GTA08_BOTSDO0150…
GO:0009063	BP	cellular amino acid catabolic process	0	9	9	42	0.000203519	0.0463495	-	gene-GTA08_BOTSDO00156(GTA08_BOTSDO00156);gene-GTA08_BOTSDO00716(GTA08_BOTSDO00716);gene-GTA08_BOTSDO03575(GTA08_BOTSDO03575);gene-GTA08_BOTSDO05670(GTA08_BOTSDO05670);gene-GTA08_BOTSDO06534(GTA08_BOTSDO06534);gene-GTA08_BOTSDO08733(GTA08_BOTSDO08733);gene-GTA08_BOTSDO08782(GTA08_BOTSDO08782);gene-GTA08_BOTSDO11859(GTA08_BOTSDO11859);gene-GTA08_BOTSDO13890(GTA08_BOTSDO13890)
GO:0016054	BP	organic acid catabolic process	0	10	10	55	0.000378363	0.0463495	-	gene-GTA08_BOTSDO00156(GTA08_BOTSDO00156);gene-GTA08_BOTSDO00716(GTA08_BOTSDO00716);gene-GTA08_BOTSDO03575(GTA08_BOTSDO03575);gene-GTA08_BOTSDO05670(GTA08_BOTSDO05670);gene-GTA08_BOTSDO06534(GTA08_BOTSDO06534);gene-GTA08_BOTSDO07597(GTA08_BOTSDO07597);gene-GTA08_BOTSDO08733(GTA08_BOTSDO08733);gene-GTA08_BOTSDO08782(GTA08_BOTSDO08782);gene-GTA08_BOTSDO11859(GTA08_BOTSDO11859);gene-GTA08_BOTSDO1389…
GO:0046395	BP	carboxylic acid catabolic process	0	10	10	55	0.000378363	0.0463495	-	gene-GTA08_BOTSDO00156(GTA08_BOTSDO00156);gene-GTA08_BOTSDO00716(GTA08_BOTSDO00716);gene-GTA08_BOTSDO03575(GTA08_BOTSDO03575);gene-GTA08_BOTSDO05670(GTA08_BOTSDO05670);gene-GTA08_BOTSDO06534(GTA08_BOTSDO06534);gene-GTA08_BOTSDO07597(GTA08_BOTSDO07597);gene-GTA08_BOTSDO08733(GTA08_BOTSDO08733);gene-GTA08_BOTSDO08782(GTA08_BOTSDO08782);gene-GTA08_BOTSDO11859(GTA08_BOTSDO11859);gene-GTA08_BOTSDO1389…
GO:0006071	BP	glycerol metabolic process	0	3	3	4	0.000501494	0.0491465	-	gene-GTA08_BOTSDO04147(GTA08_BOTSDO04147);gene-GTA08_BOTSDO07933(GTA08_BOTSDO07933);gene-GTA08_BOTSDO09111(GTA08_BOTSDO09111)
GO:0009074	BP	aromatic amino acid family catabolic process	0	5	5	16	0.000903519	0.0737874	-	gene-GTA08_BOTSDO00716(GTA08_BOTSDO00716);gene-GTA08_BOTSDO05670(GTA08_BOTSDO05670);gene-GTA08_BOTSDO06534(GTA08_BOTSDO06534);gene-GTA08_BOTSDO08782(GTA08_BOTSDO08782);gene-GTA08_BOTSDO13890(GTA08_BOTSDO13890)
GO:0019400	BP	alditol metabolic process	0	3	3	5	0.00120648	0.0844538	-	gene-GTA08_BOTSDO04147(GTA08_BOTSDO04147);gene-GTA08_BOTSDO07933(GTA08_BOTSDO07933);gene-GTA08_BOTSDO09111(GTA08_BOTSDO09111)
GO:0006066	BP	alcohol metabolic process	0	6	6	26	0.00159618	0.0977658	-	gene-GTA08_BOTSDO04147(GTA08_BOTSDO04147);gene-GTA08_BOTSDO07933(GTA08_BOTSDO07933);gene-GTA08_BOTSDO08782(GTA08_BOTSDO08782);gene-GTA08_BOTSDO09111(GTA08_BOTSDO09111);gene-GTA08_BOTSDO13523(GTA08_BOTSDO13523);gene-GTA08_BOTSDO13890(GTA08_BOTSDO13890)
GO:0044282	BP	small molecule catabolic process	0	10	10	72	0.00322706	0.165486	-	gene-GTA08_BOTSDO00156(GTA08_BOTSDO00156);gene-GTA08_BOTSDO00716(GTA08_BOTSDO00716);gene-GTA08_BOTSDO03575(GTA08_BOTSDO03575);gene-GTA08_BOTSDO05670(GTA08_BOTSDO05670);gene-GTA08_BOTSDO06534(GTA08_BOTSDO06534);gene-GTA08_BOTSDO07597(GTA08_BOTSDO07597);gene-GTA08_BOTSDO08733(GTA08_BOTSDO08733);gene-GTA08_BOTSDO08782(GTA08_BOTSDO08782);gene-GTA08_BOTSDO11859(GTA08_BOTSDO11859);gene-GTA08_BOTSDO1389…
GO:0009072	BP	aromatic amino acid family metabolic process	0	8	8	50	0.00337727	0.165486	-	gene-GTA08_BOTSDO00716(GTA08_BOTSDO00716);gene-GTA08_BOTSDO04126(GTA08_BOTSDO04126);gene-GTA08_BOTSDO05670(GTA08_BOTSDO05670);gene-GTA08_BOTSDO06534(GTA08_BOTSDO06534);gene-GTA08_BOTSDO06978(GTA08_BOTSDO06978);gene-GTA08_BOTSDO08782(GTA08_BOTSDO08782);gene-GTA08_BOTSDO11171(GTA08_BOTSDO11171);gene-GTA08_BOTSDO13890(GTA08_BOTSDO13890)
GO:1901606	BP	alpha-amino acid catabolic process	0	6	6	33	0.00569061	0.244154	-	gene-GTA08_BOTSDO00716(GTA08_BOTSDO00716);gene-GTA08_BOTSDO05670(GTA08_BOTSDO05670);gene-GTA08_BOTSDO06534(GTA08_BOTSDO06534);gene-GTA08_BOTSDO08782(GTA08_BOTSDO08782);gene-GTA08_BOTSDO11859(GTA08_BOTSDO11859);gene-GTA08_BOTSDO13890(GTA08_BOTSDO13890)
GO:0000947	BP	amino acid catabolic process to alcohol via Ehrlich pathway	0	2	2	3	0.00747409	0.244154	-	gene-GTA08_BOTSDO08782(GTA08_BOTSDO08782);gene-GTA08_BOTSDO13890(GTA08_BOTSDO13890)
GO:0000955	BP	amino acid catabolic process via Ehrlich pathway	0	2	2	3	0.00747409	0.244154	-	gene-GTA08_BOTSDO08782(GTA08_BOTSDO08782);gene-GTA08_BOTSDO13890(GTA08_BOTSDO13890)
GO:0006559	BP	L-phenylalanine catabolic process	0	2	2	3	0.00747409	0.244154	-	gene-GTA08_BOTSDO00716(GTA08_BOTSDO00716);gene-GTA08_BOTSDO06534(GTA08_BOTSDO06534)
GO:1902222	BP	erythrose 4-phosphate/phosphoenolpyruvate family amino acid catabolic process	0	2	2	3	0.00747409	0.244154	-	gene-GTA08_BOTSDO00716(GTA08_BOTSDO00716);gene-GTA08_BOTSDO06534(GTA08_BOTSDO06534)
GO:0005975	BP	carbohydrate metabolic process	6	25	31	398	0.0106661	0.32665	gene-GTA08_BOTSDO04463(GTA08_BOTSDO04463);gene-GTA08_BOTSDO05188(GTA08_BOTSDO05188);gene-GTA08_BOTSDO10192(GTA08_BOTSDO10192);gene-GTA08_BOTSDO10386(GTA08_BOTSDO10386);gene-GTA08_BOTSDO10962(GTA08_BOTSDO10962);gene-GTA08_BOTSDO11906(GTA08_BOTSDO11906)	gene-GTA08_BOTSDO01891(GTA08_BOTSDO01891);gene-GTA08_BOTSDO02133(GTA08_BOTSDO02133);gene-GTA08_BOTSDO02303(GTA08_BOTSDO02303);gene-GTA08_BOTSDO02647(GTA08_BOTSDO02647);gene-GTA08_BOTSDO02849(GTA08_BOTSDO02849);gene-GTA08_BOTSDO03803(GTA08_BOTSDO03803);gene-GTA08_BOTSDO03804(GTA08_BOTSDO03804);gene-GTA08_BOTSDO04147(GTA08_BOTSDO04147);gene-GTA08_BOTSDO05341(GTA08_BOTSDO05341);gene-GTA08_BOTSDO0541…
GO:1901615	BP	organic hydroxy compound metabolic process	0	7	7	52	0.0153283	0.431254	-	gene-GTA08_BOTSDO04147(GTA08_BOTSDO04147);gene-GTA08_BOTSDO05765(GTA08_BOTSDO05765);gene-GTA08_BOTSDO07933(GTA08_BOTSDO07933);gene-GTA08_BOTSDO08782(GTA08_BOTSDO08782);gene-GTA08_BOTSDO09111(GTA08_BOTSDO09111);gene-GTA08_BOTSDO13523(GTA08_BOTSDO13523);gene-GTA08_BOTSDO13890(GTA08_BOTSDO13890)
GO:0019751	BP	polyol metabolic process	0	3	3	11	0.015842	0.431254	-	gene-GTA08_BOTSDO04147(GTA08_BOTSDO04147);gene-GTA08_BOTSDO07933(GTA08_BOTSDO07933);gene-GTA08_BOTSDO09111(GTA08_BOTSDO09111)
GO:0006558	BP	L-phenylalanine metabolic process	0	2	2	5	0.0232735	0.548742	-	gene-GTA08_BOTSDO00716(GTA08_BOTSDO00716);gene-GTA08_BOTSDO06534(GTA08_BOTSDO06534)
GO:1902221	BP	erythrose 4-phosphate/phosphoenolpyruvate family amino acid metabolic process	0	2	2	5	0.0232735	0.548742	-	gene-GTA08_BOTSDO00716(GTA08_BOTSDO00716);gene-GTA08_BOTSDO06534(GTA08_BOTSDO06534)
GO:0008152	BP	metabolic process	73	173	246	4551	0.0235175	0.548742	gene-GTA08_BOTSDO00398(GTA08_BOTSDO00398);gene-GTA08_BOTSDO00957(GTA08_BOTSDO00957);gene-GTA08_BOTSDO01182(GTA08_BOTSDO01182);gene-GTA08_BOTSDO01186(GTA08_BOTSDO01186);gene-GTA08_BOTSDO01192(GTA08_BOTSDO01192);gene-GTA08_BOTSDO01193(GTA08_BOTSDO01193);gene-GTA08_BOTSDO01194(GTA08_BOTSDO01194);gene-GTA08_BOTSDO01396(GTA08_BOTSDO01396);gene-GTA08_BOTSDO01755(GTA08_BOTSDO01755);gene-GTA08_BOTSDO0202…	gene-GTA08_BOTSDO00012(GTA08_BOTSDO00012);gene-GTA08_BOTSDO00110(GTA08_BOTSDO00110);gene-GTA08_BOTSDO00156(GTA08_BOTSDO00156);gene-GTA08_BOTSDO00332(GTA08_BOTSDO00332);gene-GTA08_BOTSDO00341(GTA08_BOTSDO00341);gene-GTA08_BOTSDO00371(GTA08_BOTSDO00371);gene-GTA08_BOTSDO00382(GTA08_BOTSDO00382);gene-GTA08_BOTSDO00477(GTA08_BOTSDO00477);gene-GTA08_BOTSDO00551(GTA08_BOTSDO00551);gene-GTA08_BOTSDO0066…
GO:0098869	BP	cellular oxidant detoxification	3	4	7	60	0.031404	0.643188	gene-GTA08_BOTSDO05830(GTA08_BOTSDO05830);gene-GTA08_BOTSDO09581(GTA08_BOTSDO09581);gene-GTA08_BOTSDO13964(GTA08_BOTSDO13964)	gene-GTA08_BOTSDO01875(GTA08_BOTSDO01875);gene-GTA08_BOTSDO01877(GTA08_BOTSDO01877);gene-GTA08_BOTSDO02767(GTA08_BOTSDO02767);gene-GTA08_BOTSDO12189(GTA08_BOTSDO12189)
GO:0009083	BP	branched-chain amino acid catabolic process	0	2	2	6	0.0337491	0.643188	-	gene-GTA08_BOTSDO08782(GTA08_BOTSDO08782);gene-GTA08_BOTSDO13890(GTA08_BOTSDO13890)
GO:0098754	BP	detoxification	3	4	7	64	0.042599	0.643188	gene-GTA08_BOTSDO05830(GTA08_BOTSDO05830);gene-GTA08_BOTSDO09581(GTA08_BOTSDO09581);gene-GTA08_BOTSDO13964(GTA08_BOTSDO13964)	gene-GTA08_BOTSDO01875(GTA08_BOTSDO01875);gene-GTA08_BOTSDO01877(GTA08_BOTSDO01877);gene-GTA08_BOTSDO02767(GTA08_BOTSDO02767);gene-GTA08_BOTSDO12189(GTA08_BOTSDO12189)
GO:1990748	BP	cellular detoxification	3	4	7	64	0.042599	0.643188	gene-GTA08_BOTSDO05830(GTA08_BOTSDO05830);gene-GTA08_BOTSDO09581(GTA08_BOTSDO09581);gene-GTA08_BOTSDO13964(GTA08_BOTSDO13964)	gene-GTA08_BOTSDO01875(GTA08_BOTSDO01875);gene-GTA08_BOTSDO01877(GTA08_BOTSDO01877);gene-GTA08_BOTSDO02767(GTA08_BOTSDO02767);gene-GTA08_BOTSDO12189(GTA08_BOTSDO12189)
GO:0044262	BP	cellular carbohydrate metabolic process	2	5	7	65	0.0457543	0.643188	gene-GTA08_BOTSDO04463(GTA08_BOTSDO04463);gene-GTA08_BOTSDO10386(GTA08_BOTSDO10386)	gene-GTA08_BOTSDO02133(GTA08_BOTSDO02133);gene-GTA08_BOTSDO04147(GTA08_BOTSDO04147);gene-GTA08_BOTSDO07933(GTA08_BOTSDO07933);gene-GTA08_BOTSDO08820(GTA08_BOTSDO08820);gene-GTA08_BOTSDO09111(GTA08_BOTSDO09111)
GO:0009699	BP	phenylpropanoid biosynthetic process	0	1	1	1	0.050856	0.643188	-	gene-GTA08_BOTSDO00716(GTA08_BOTSDO00716)
GO:0009800	BP	cinnamic acid biosynthetic process	0	1	1	1	0.050856	0.643188	-	gene-GTA08_BOTSDO00716(GTA08_BOTSDO00716)
GO:0015743	BP	malate transport	1	0	1	1	0.050856	0.643188	gene-GTA08_BOTSDO04858(GTA08_BOTSDO04858)	-
GO:0015750	BP	pentose transmembrane transport	0	1	1	1	0.050856	0.643188	-	gene-GTA08_BOTSDO13953(GTA08_BOTSDO13953)
GO:0015751	BP	arabinose transmembrane transport	0	1	1	1	0.050856	0.643188	-	gene-GTA08_BOTSDO13953(GTA08_BOTSDO13953)
GO:0015755	BP	fructose transmembrane transport	0	1	1	1	0.050856	0.643188	-	gene-GTA08_BOTSDO13953(GTA08_BOTSDO13953)
GO:0015756	BP	fucose transmembrane transport	0	1	1	1	0.050856	0.643188	-	gene-GTA08_BOTSDO13953(GTA08_BOTSDO13953)
GO:0015757	BP	galactose transmembrane transport	0	1	1	1	0.050856	0.643188	-	gene-GTA08_BOTSDO13953(GTA08_BOTSDO13953)
GO:0031388	BP	organic acid phosphorylation	1	0	1	1	0.050856	0.643188	gene-GTA08_BOTSDO03374(GTA08_BOTSDO03374)	-
GO:0032434	BP	regulation of proteasomal ubiquitin-dependent protein catabolic process	1	0	1	1	0.050856	0.643188	gene-GTA08_BOTSDO00957(GTA08_BOTSDO00957)	-
GO:0032436	BP	positive regulation of proteasomal ubiquitin-dependent protein catabolic process	1	0	1	1	0.050856	0.643188	gene-GTA08_BOTSDO00957(GTA08_BOTSDO00957)	-
GO:0071423	BP	malate transmembrane transport	1	0	1	1	0.050856	0.643188	gene-GTA08_BOTSDO04858(GTA08_BOTSDO04858)	-
GO:0009636	BP	response to toxic substance	3	4	7	67	0.0525052	0.643188	gene-GTA08_BOTSDO05830(GTA08_BOTSDO05830);gene-GTA08_BOTSDO09581(GTA08_BOTSDO09581);gene-GTA08_BOTSDO13964(GTA08_BOTSDO13964)	gene-GTA08_BOTSDO01875(GTA08_BOTSDO01875);gene-GTA08_BOTSDO01877(GTA08_BOTSDO01877);gene-GTA08_BOTSDO02767(GTA08_BOTSDO02767);gene-GTA08_BOTSDO12189(GTA08_BOTSDO12189)
GO:0097237	BP	cellular response to toxic substance	3	4	7	67	0.0525052	0.643188	gene-GTA08_BOTSDO05830(GTA08_BOTSDO05830);gene-GTA08_BOTSDO09581(GTA08_BOTSDO09581);gene-GTA08_BOTSDO13964(GTA08_BOTSDO13964)	gene-GTA08_BOTSDO01875(GTA08_BOTSDO01875);gene-GTA08_BOTSDO01877(GTA08_BOTSDO01877);gene-GTA08_BOTSDO02767(GTA08_BOTSDO02767);gene-GTA08_BOTSDO12189(GTA08_BOTSDO12189)
GO:0016042	BP	lipid catabolic process	1	3	4	29	0.0571643	0.683183	gene-GTA08_BOTSDO14098(GTA08_BOTSDO14098)	gene-GTA08_BOTSDO00332(GTA08_BOTSDO00332);gene-GTA08_BOTSDO07597(GTA08_BOTSDO07597);gene-GTA08_BOTSDO11702(GTA08_BOTSDO11702)
GO:0055085	BP	transmembrane transport	18	31	49	790	0.0765241	0.891752	gene-GTA08_BOTSDO00735(GTA08_BOTSDO00735);gene-GTA08_BOTSDO02626(GTA08_BOTSDO02626);gene-GTA08_BOTSDO02880(GTA08_BOTSDO02880);gene-GTA08_BOTSDO03375(GTA08_BOTSDO03375);gene-GTA08_BOTSDO03968(GTA08_BOTSDO03968);gene-GTA08_BOTSDO04416(GTA08_BOTSDO04416);gene-GTA08_BOTSDO04858(GTA08_BOTSDO04858);gene-GTA08_BOTSDO04869(GTA08_BOTSDO04869);gene-GTA08_BOTSDO05267(GTA08_BOTSDO05267);gene-GTA08_BOTSDO0529…	gene-GTA08_BOTSDO00110(GTA08_BOTSDO00110);gene-GTA08_BOTSDO00662(GTA08_BOTSDO00662);gene-GTA08_BOTSDO00886(GTA08_BOTSDO00886);gene-GTA08_BOTSDO01346(GTA08_BOTSDO01346);gene-GTA08_BOTSDO01505(GTA08_BOTSDO01505);gene-GTA08_BOTSDO01701(GTA08_BOTSDO01701);gene-GTA08_BOTSDO01844(GTA08_BOTSDO01844);gene-GTA08_BOTSDO01978(GTA08_BOTSDO01978);gene-GTA08_BOTSDO02321(GTA08_BOTSDO02321);gene-GTA08_BOTSDO0289…
GO:0008299	BP	isoprenoid biosynthetic process	3	0	3	20	0.0782558	0.891752	gene-GTA08_BOTSDO01182(GTA08_BOTSDO01182);gene-GTA08_BOTSDO01186(GTA08_BOTSDO01186);gene-GTA08_BOTSDO01193(GTA08_BOTSDO01193)	-
GO:1901361	BP	organic cyclic compound catabolic process	0	9	9	104	0.0813548	0.905996	-	gene-GTA08_BOTSDO00716(GTA08_BOTSDO00716);gene-GTA08_BOTSDO02033(GTA08_BOTSDO02033);gene-GTA08_BOTSDO02221(GTA08_BOTSDO02221);gene-GTA08_BOTSDO05670(GTA08_BOTSDO05670);gene-GTA08_BOTSDO06534(GTA08_BOTSDO06534);gene-GTA08_BOTSDO08782(GTA08_BOTSDO08782);gene-GTA08_BOTSDO11445(GTA08_BOTSDO11445);gene-GTA08_BOTSDO11859(GTA08_BOTSDO11859);gene-GTA08_BOTSDO13890(GTA08_BOTSDO13890)
GO:0042737	BP	drug catabolic process	0	4	4	34	0.0918728	0.952462	-	gene-GTA08_BOTSDO00716(GTA08_BOTSDO00716);gene-GTA08_BOTSDO06534(GTA08_BOTSDO06534);gene-GTA08_BOTSDO07597(GTA08_BOTSDO07597);gene-GTA08_BOTSDO12189(GTA08_BOTSDO12189)
GO:0006508	BP	proteolysis	5	16	21	304	0.0922968	0.952462	gene-GTA08_BOTSDO00957(GTA08_BOTSDO00957);gene-GTA08_BOTSDO06236(GTA08_BOTSDO06236);gene-GTA08_BOTSDO07349(GTA08_BOTSDO07349);gene-GTA08_BOTSDO08711(GTA08_BOTSDO08711);gene-GTA08_BOTSDO09315(GTA08_BOTSDO09315)	gene-GTA08_BOTSDO00884(GTA08_BOTSDO00884);gene-GTA08_BOTSDO01758(GTA08_BOTSDO01758);gene-GTA08_BOTSDO02339(GTA08_BOTSDO02339);gene-GTA08_BOTSDO03475(GTA08_BOTSDO03475);gene-GTA08_BOTSDO03981(GTA08_BOTSDO03981);gene-GTA08_BOTSDO03986(GTA08_BOTSDO03986);gene-GTA08_BOTSDO04544(GTA08_BOTSDO04544);gene-GTA08_BOTSDO05396(GTA08_BOTSDO05396);gene-GTA08_BOTSDO07307(GTA08_BOTSDO07307);gene-GTA08_BOTSDO0755…
GO:0006720	BP	isoprenoid metabolic process	3	0	3	22	0.0982378	0.952462	gene-GTA08_BOTSDO01182(GTA08_BOTSDO01182);gene-GTA08_BOTSDO01186(GTA08_BOTSDO01186);gene-GTA08_BOTSDO01193(GTA08_BOTSDO01193)	-
GO:0015740	BP	C4-dicarboxylate transport	1	0	1	2	0.0991338	0.952462	gene-GTA08_BOTSDO04858(GTA08_BOTSDO04858)	-
GO:0045337	BP	farnesyl diphosphate biosynthetic process	1	0	1	2	0.0991338	0.952462	gene-GTA08_BOTSDO01182(GTA08_BOTSDO01182)	-
GO:0045338	BP	farnesyl diphosphate metabolic process	1	0	1	2	0.0991338	0.952462	gene-GTA08_BOTSDO01182(GTA08_BOTSDO01182)	-
GO:2000060	BP	positive regulation of ubiquitin-dependent protein catabolic process	1	0	1	2	0.0991338	0.952462	gene-GTA08_BOTSDO00957(GTA08_BOTSDO00957)	-
GO:0017001	BP	antibiotic catabolic process	0	2	2	11	0.10473	0.959894	-	gene-GTA08_BOTSDO07597(GTA08_BOTSDO07597);gene-GTA08_BOTSDO12189(GTA08_BOTSDO12189)
GO:0046165	BP	alcohol biosynthetic process	0	2	2	11	0.10473	0.959894	-	gene-GTA08_BOTSDO08782(GTA08_BOTSDO08782);gene-GTA08_BOTSDO13890(GTA08_BOTSDO13890)
GO:0009308	BP	amine metabolic process	0	4	4	36	0.108017	0.959894	-	gene-GTA08_BOTSDO01717(GTA08_BOTSDO01717);gene-GTA08_BOTSDO05670(GTA08_BOTSDO05670);gene-GTA08_BOTSDO09755(GTA08_BOTSDO09755);gene-GTA08_BOTSDO10310(GTA08_BOTSDO10310)
GO:0006979	BP	response to oxidative stress	3	2	5	50	0.10847	0.959894	gene-GTA08_BOTSDO05830(GTA08_BOTSDO05830);gene-GTA08_BOTSDO09581(GTA08_BOTSDO09581);gene-GTA08_BOTSDO13964(GTA08_BOTSDO13964)	gene-GTA08_BOTSDO02767(GTA08_BOTSDO02767);gene-GTA08_BOTSDO12189(GTA08_BOTSDO12189)
GO:0006520	BP	cellular amino acid metabolic process	1	16	17	244	0.114542	0.959894	gene-GTA08_BOTSDO02628(GTA08_BOTSDO02628)	gene-GTA08_BOTSDO00156(GTA08_BOTSDO00156);gene-GTA08_BOTSDO00716(GTA08_BOTSDO00716);gene-GTA08_BOTSDO01981(GTA08_BOTSDO01981);gene-GTA08_BOTSDO02900(GTA08_BOTSDO02900);gene-GTA08_BOTSDO03575(GTA08_BOTSDO03575);gene-GTA08_BOTSDO04126(GTA08_BOTSDO04126);gene-GTA08_BOTSDO05670(GTA08_BOTSDO05670);gene-GTA08_BOTSDO06534(GTA08_BOTSDO06534);gene-GTA08_BOTSDO06978(GTA08_BOTSDO06978);gene-GTA08_BOTSDO0873…
GO:0009081	BP	branched-chain amino acid metabolic process	0	3	3	24	0.120036	0.959894	-	gene-GTA08_BOTSDO08782(GTA08_BOTSDO08782);gene-GTA08_BOTSDO11714(GTA08_BOTSDO11714);gene-GTA08_BOTSDO13890(GTA08_BOTSDO13890)
GO:0008643	BP	carbohydrate transport	2	4	6	67	0.123875	0.959894	gene-GTA08_BOTSDO05292(GTA08_BOTSDO05292);gene-GTA08_BOTSDO06390(GTA08_BOTSDO06390)	gene-GTA08_BOTSDO01505(GTA08_BOTSDO01505);gene-GTA08_BOTSDO05301(GTA08_BOTSDO05301);gene-GTA08_BOTSDO05468(GTA08_BOTSDO05468);gene-GTA08_BOTSDO13953(GTA08_BOTSDO13953)
GO:0019439	BP	aromatic compound catabolic process	0	8	8	98	0.124409	0.959894	-	gene-GTA08_BOTSDO00716(GTA08_BOTSDO00716);gene-GTA08_BOTSDO02033(GTA08_BOTSDO02033);gene-GTA08_BOTSDO02221(GTA08_BOTSDO02221);gene-GTA08_BOTSDO05670(GTA08_BOTSDO05670);gene-GTA08_BOTSDO06534(GTA08_BOTSDO06534);gene-GTA08_BOTSDO08782(GTA08_BOTSDO08782);gene-GTA08_BOTSDO11445(GTA08_BOTSDO11445);gene-GTA08_BOTSDO13890(GTA08_BOTSDO13890)
GO:0006721	BP	terpenoid metabolic process	1	0	1	3	0.144964	0.959894	gene-GTA08_BOTSDO01182(GTA08_BOTSDO01182)	-
GO:0007166	BP	cell surface receptor signaling pathway	0	1	1	3	0.144964	0.959894	-	gene-GTA08_BOTSDO04606(GTA08_BOTSDO04606)
GO:0008645	BP	hexose transmembrane transport	0	1	1	3	0.144964	0.959894	-	gene-GTA08_BOTSDO13953(GTA08_BOTSDO13953)
GO:0009264	BP	deoxyribonucleotide catabolic process	0	1	1	3	0.144964	0.959894	-	gene-GTA08_BOTSDO02221(GTA08_BOTSDO02221)
GO:0009698	BP	phenylpropanoid metabolic process	0	1	1	3	0.144964	0.959894	-	gene-GTA08_BOTSDO00716(GTA08_BOTSDO00716)
GO:0009803	BP	cinnamic acid metabolic process	0	1	1	3	0.144964	0.959894	-	gene-GTA08_BOTSDO00716(GTA08_BOTSDO00716)
GO:0015749	BP	monosaccharide transmembrane transport	0	1	1	3	0.144964	0.959894	-	gene-GTA08_BOTSDO13953(GTA08_BOTSDO13953)
GO:0016114	BP	terpenoid biosynthetic process	1	0	1	3	0.144964	0.959894	gene-GTA08_BOTSDO01182(GTA08_BOTSDO01182)	-
GO:0019541	BP	propionate metabolic process	0	1	1	3	0.144964	0.959894	-	gene-GTA08_BOTSDO07597(GTA08_BOTSDO07597)
GO:0019543	BP	propionate catabolic process	0	1	1	3	0.144964	0.959894	-	gene-GTA08_BOTSDO07597(GTA08_BOTSDO07597)
GO:0019626	BP	short-chain fatty acid catabolic process	0	1	1	3	0.144964	0.959894	-	gene-GTA08_BOTSDO07597(GTA08_BOTSDO07597)
GO:0019629	BP	propionate catabolic process, 2-methylcitrate cycle	0	1	1	3	0.144964	0.959894	-	gene-GTA08_BOTSDO07597(GTA08_BOTSDO07597)
GO:0034219	BP	carbohydrate transmembrane transport	0	1	1	3	0.144964	0.959894	-	gene-GTA08_BOTSDO13953(GTA08_BOTSDO13953)
GO:1901800	BP	positive regulation of proteasomal protein catabolic process	1	0	1	3	0.144964	0.959894	gene-GTA08_BOTSDO00957(GTA08_BOTSDO00957)	-
GO:2000058	BP	regulation of ubiquitin-dependent protein catabolic process	1	0	1	3	0.144964	0.959894	gene-GTA08_BOTSDO00957(GTA08_BOTSDO00957)	-
GO:0016999	BP	antibiotic metabolic process	0	2	2	14	0.157067	1	-	gene-GTA08_BOTSDO07597(GTA08_BOTSDO07597);gene-GTA08_BOTSDO12189(GTA08_BOTSDO12189)
GO:0006813	BP	potassium ion transport	0	2	2	15	0.175447	1	-	gene-GTA08_BOTSDO00662(GTA08_BOTSDO00662);gene-GTA08_BOTSDO10310(GTA08_BOTSDO10310)
GO:0030243	BP	cellulose metabolic process	1	1	2	15	0.175447	1	gene-GTA08_BOTSDO10386(GTA08_BOTSDO10386)	gene-GTA08_BOTSDO08820(GTA08_BOTSDO08820)
GO:0030245	BP	cellulose catabolic process	1	1	2	15	0.175447	1	gene-GTA08_BOTSDO10386(GTA08_BOTSDO10386)	gene-GTA08_BOTSDO08820(GTA08_BOTSDO08820)
GO:0051275	BP	beta-glucan catabolic process	1	1	2	15	0.175447	1	gene-GTA08_BOTSDO10386(GTA08_BOTSDO10386)	gene-GTA08_BOTSDO08820(GTA08_BOTSDO08820)
GO:0071805	BP	potassium ion transmembrane transport	0	2	2	15	0.175447	1	-	gene-GTA08_BOTSDO00662(GTA08_BOTSDO00662);gene-GTA08_BOTSDO10310(GTA08_BOTSDO10310)
GO:1901575	BP	organic substance catabolic process	5	18	23	369	0.178827	1	gene-GTA08_BOTSDO00957(GTA08_BOTSDO00957);gene-GTA08_BOTSDO04463(GTA08_BOTSDO04463);gene-GTA08_BOTSDO07350(GTA08_BOTSDO07350);gene-GTA08_BOTSDO10386(GTA08_BOTSDO10386);gene-GTA08_BOTSDO14098(GTA08_BOTSDO14098)	gene-GTA08_BOTSDO00156(GTA08_BOTSDO00156);gene-GTA08_BOTSDO00332(GTA08_BOTSDO00332);gene-GTA08_BOTSDO00716(GTA08_BOTSDO00716);gene-GTA08_BOTSDO02033(GTA08_BOTSDO02033);gene-GTA08_BOTSDO02133(GTA08_BOTSDO02133);gene-GTA08_BOTSDO02221(GTA08_BOTSDO02221);gene-GTA08_BOTSDO03575(GTA08_BOTSDO03575);gene-GTA08_BOTSDO05670(GTA08_BOTSDO05670);gene-GTA08_BOTSDO06534(GTA08_BOTSDO06534);gene-GTA08_BOTSDO0759…
GO:0006570	BP	tyrosine metabolic process	0	1	1	4	0.188469	1	-	gene-GTA08_BOTSDO06534(GTA08_BOTSDO06534)
GO:0033621	BP	nuclear-transcribed mRNA catabolic process, meiosis-specific transcripts	0	1	1	4	0.188469	1	-	gene-GTA08_BOTSDO11445(GTA08_BOTSDO11445)
GO:0043629	BP	ncRNA polyadenylation	0	1	1	4	0.188469	1	-	gene-GTA08_BOTSDO11445(GTA08_BOTSDO11445)
GO:0046459	BP	short-chain fatty acid metabolic process	0	1	1	4	0.188469	1	-	gene-GTA08_BOTSDO07597(GTA08_BOTSDO07597)
GO:0071050	BP	snoRNA polyadenylation	0	1	1	4	0.188469	1	-	gene-GTA08_BOTSDO11445(GTA08_BOTSDO11445)
GO:1903052	BP	positive regulation of proteolysis involved in cellular protein catabolic process	1	0	1	4	0.188469	1	gene-GTA08_BOTSDO00957(GTA08_BOTSDO00957)	-
GO:1903364	BP	positive regulation of cellular protein catabolic process	1	0	1	4	0.188469	1	gene-GTA08_BOTSDO00957(GTA08_BOTSDO00957)	-
GO:0042537	BP	benzene-containing compound metabolic process	0	2	2	16	0.194143	1	-	gene-GTA08_BOTSDO00716(GTA08_BOTSDO00716);gene-GTA08_BOTSDO05670(GTA08_BOTSDO05670)
GO:0044242	BP	cellular lipid catabolic process	1	1	2	16	0.194143	1	gene-GTA08_BOTSDO14098(GTA08_BOTSDO14098)	gene-GTA08_BOTSDO07597(GTA08_BOTSDO07597)
GO:0044247	BP	cellular polysaccharide catabolic process	1	1	2	16	0.194143	1	gene-GTA08_BOTSDO10386(GTA08_BOTSDO10386)	gene-GTA08_BOTSDO08820(GTA08_BOTSDO08820)
GO:1901605	BP	alpha-amino acid metabolic process	0	10	10	144	0.196474	1	-	gene-GTA08_BOTSDO00716(GTA08_BOTSDO00716);gene-GTA08_BOTSDO01981(GTA08_BOTSDO01981);gene-GTA08_BOTSDO02900(GTA08_BOTSDO02900);gene-GTA08_BOTSDO04126(GTA08_BOTSDO04126);gene-GTA08_BOTSDO05670(GTA08_BOTSDO05670);gene-GTA08_BOTSDO06534(GTA08_BOTSDO06534);gene-GTA08_BOTSDO08782(GTA08_BOTSDO08782);gene-GTA08_BOTSDO11859(GTA08_BOTSDO11859);gene-GTA08_BOTSDO11986(GTA08_BOTSDO11986);gene-GTA08_BOTSDO1389…
GO:0044264	BP	cellular polysaccharide metabolic process	1	2	3	31	0.207323	1	gene-GTA08_BOTSDO10386(GTA08_BOTSDO10386)	gene-GTA08_BOTSDO02133(GTA08_BOTSDO02133);gene-GTA08_BOTSDO08820(GTA08_BOTSDO08820)
GO:0044248	BP	cellular catabolic process	3	17	20	327	0.223956	1	gene-GTA08_BOTSDO00957(GTA08_BOTSDO00957);gene-GTA08_BOTSDO10386(GTA08_BOTSDO10386);gene-GTA08_BOTSDO14098(GTA08_BOTSDO14098)	gene-GTA08_BOTSDO00156(GTA08_BOTSDO00156);gene-GTA08_BOTSDO00716(GTA08_BOTSDO00716);gene-GTA08_BOTSDO02033(GTA08_BOTSDO02033);gene-GTA08_BOTSDO02133(GTA08_BOTSDO02133);gene-GTA08_BOTSDO02221(GTA08_BOTSDO02221);gene-GTA08_BOTSDO03575(GTA08_BOTSDO03575);gene-GTA08_BOTSDO05670(GTA08_BOTSDO05670);gene-GTA08_BOTSDO06534(GTA08_BOTSDO06534);gene-GTA08_BOTSDO07597(GTA08_BOTSDO07597);gene-GTA08_BOTSDO0873…
GO:0006308	BP	DNA catabolic process	0	1	1	5	0.229768	1	-	gene-GTA08_BOTSDO02033(GTA08_BOTSDO02033)
GO:0006564	BP	L-serine biosynthetic process	0	1	1	5	0.229768	1	-	gene-GTA08_BOTSDO11986(GTA08_BOTSDO11986)
GO:0006835	BP	dicarboxylic acid transport	1	0	1	5	0.229768	1	gene-GTA08_BOTSDO04858(GTA08_BOTSDO04858)	-
GO:0009712	BP	catechol-containing compound metabolic process	0	1	1	5	0.229768	1	-	gene-GTA08_BOTSDO05765(GTA08_BOTSDO05765)
GO:0010410	BP	hemicellulose metabolic process	0	1	1	5	0.229768	1	-	gene-GTA08_BOTSDO02133(GTA08_BOTSDO02133)
GO:0042744	BP	hydrogen peroxide catabolic process	0	1	1	5	0.229768	1	-	gene-GTA08_BOTSDO12189(GTA08_BOTSDO12189)
GO:0044347	BP	cell wall polysaccharide catabolic process	0	1	1	5	0.229768	1	-	gene-GTA08_BOTSDO02133(GTA08_BOTSDO02133)
GO:0045491	BP	xylan metabolic process	0	1	1	5	0.229768	1	-	gene-GTA08_BOTSDO02133(GTA08_BOTSDO02133)
GO:0045493	BP	xylan catabolic process	0	1	1	5	0.229768	1	-	gene-GTA08_BOTSDO02133(GTA08_BOTSDO02133)
GO:0045732	BP	positive regulation of protein catabolic process	1	0	1	5	0.229768	1	gene-GTA08_BOTSDO00957(GTA08_BOTSDO00957)	-
GO:0061136	BP	regulation of proteasomal protein catabolic process	1	0	1	5	0.229768	1	gene-GTA08_BOTSDO00957(GTA08_BOTSDO00957)	-
GO:0009251	BP	glucan catabolic process	1	1	2	18	0.232172	1	gene-GTA08_BOTSDO10386(GTA08_BOTSDO10386)	gene-GTA08_BOTSDO08820(GTA08_BOTSDO08820)
GO:0009056	BP	catabolic process	5	19	24	408	0.254637	1	gene-GTA08_BOTSDO00957(GTA08_BOTSDO00957);gene-GTA08_BOTSDO04463(GTA08_BOTSDO04463);gene-GTA08_BOTSDO07350(GTA08_BOTSDO07350);gene-GTA08_BOTSDO10386(GTA08_BOTSDO10386);gene-GTA08_BOTSDO14098(GTA08_BOTSDO14098)	gene-GTA08_BOTSDO00156(GTA08_BOTSDO00156);gene-GTA08_BOTSDO00332(GTA08_BOTSDO00332);gene-GTA08_BOTSDO00716(GTA08_BOTSDO00716);gene-GTA08_BOTSDO02033(GTA08_BOTSDO02033);gene-GTA08_BOTSDO02133(GTA08_BOTSDO02133);gene-GTA08_BOTSDO02221(GTA08_BOTSDO02221);gene-GTA08_BOTSDO03575(GTA08_BOTSDO03575);gene-GTA08_BOTSDO05670(GTA08_BOTSDO05670);gene-GTA08_BOTSDO06534(GTA08_BOTSDO06534);gene-GTA08_BOTSDO0759…
GO:0006562	BP	proline catabolic process	0	1	1	6	0.268972	1	-	gene-GTA08_BOTSDO11859(GTA08_BOTSDO11859)
GO:0008361	BP	regulation of cell size	1	0	1	6	0.268972	1	gene-GTA08_BOTSDO06692(GTA08_BOTSDO06692)	-
GO:0009262	BP	deoxyribonucleotide metabolic process	0	1	1	6	0.268972	1	-	gene-GTA08_BOTSDO02221(GTA08_BOTSDO02221)
GO:0009395	BP	phospholipid catabolic process	1	0	1	6	0.268972	1	gene-GTA08_BOTSDO14098(GTA08_BOTSDO14098)	-
GO:0042743	BP	hydrogen peroxide metabolic process	0	1	1	6	0.268972	1	-	gene-GTA08_BOTSDO12189(GTA08_BOTSDO12189)
GO:0044275	BP	cellular carbohydrate catabolic process	1	1	2	20	0.270602	1	gene-GTA08_BOTSDO10386(GTA08_BOTSDO10386)	gene-GTA08_BOTSDO08820(GTA08_BOTSDO08820)
GO:0046434	BP	organophosphate catabolic process	1	1	2	20	0.270602	1	gene-GTA08_BOTSDO14098(GTA08_BOTSDO14098)	gene-GTA08_BOTSDO02221(GTA08_BOTSDO02221)
GO:0051273	BP	beta-glucan metabolic process	1	1	2	20	0.270602	1	gene-GTA08_BOTSDO10386(GTA08_BOTSDO10386)	gene-GTA08_BOTSDO08820(GTA08_BOTSDO08820)
GO:1901565	BP	organonitrogen compound catabolic process	1	10	11	179	0.301658	1	gene-GTA08_BOTSDO00957(GTA08_BOTSDO00957)	gene-GTA08_BOTSDO00156(GTA08_BOTSDO00156);gene-GTA08_BOTSDO00716(GTA08_BOTSDO00716);gene-GTA08_BOTSDO03575(GTA08_BOTSDO03575);gene-GTA08_BOTSDO05670(GTA08_BOTSDO05670);gene-GTA08_BOTSDO06534(GTA08_BOTSDO06534);gene-GTA08_BOTSDO08733(GTA08_BOTSDO08733);gene-GTA08_BOTSDO08782(GTA08_BOTSDO08782);gene-GTA08_BOTSDO09127(GTA08_BOTSDO09127);gene-GTA08_BOTSDO11859(GTA08_BOTSDO11859);gene-GTA08_BOTSDO1389…
GO:0009166	BP	nucleotide catabolic process	0	1	1	7	0.306187	1	-	gene-GTA08_BOTSDO02221(GTA08_BOTSDO02221)
GO:0019441	BP	tryptophan catabolic process to kynurenine	0	1	1	7	0.306187	1	-	gene-GTA08_BOTSDO05670(GTA08_BOTSDO05670)
GO:1903050	BP	regulation of proteolysis involved in cellular protein catabolic process	1	0	1	7	0.306187	1	gene-GTA08_BOTSDO00957(GTA08_BOTSDO00957)	-
GO:1903362	BP	regulation of cellular protein catabolic process	1	0	1	7	0.306187	1	gene-GTA08_BOTSDO00957(GTA08_BOTSDO00957)	-
GO:0006082	BP	organic acid metabolic process	5	17	22	385	0.31381	1	gene-GTA08_BOTSDO02628(GTA08_BOTSDO02628);gene-GTA08_BOTSDO03374(GTA08_BOTSDO03374);gene-GTA08_BOTSDO04463(GTA08_BOTSDO04463);gene-GTA08_BOTSDO05095(GTA08_BOTSDO05095);gene-GTA08_BOTSDO11135(GTA08_BOTSDO11135)	gene-GTA08_BOTSDO00156(GTA08_BOTSDO00156);gene-GTA08_BOTSDO00716(GTA08_BOTSDO00716);gene-GTA08_BOTSDO01981(GTA08_BOTSDO01981);gene-GTA08_BOTSDO02900(GTA08_BOTSDO02900);gene-GTA08_BOTSDO03575(GTA08_BOTSDO03575);gene-GTA08_BOTSDO04126(GTA08_BOTSDO04126);gene-GTA08_BOTSDO05670(GTA08_BOTSDO05670);gene-GTA08_BOTSDO06534(GTA08_BOTSDO06534);gene-GTA08_BOTSDO06978(GTA08_BOTSDO06978);gene-GTA08_BOTSDO0759…
GO:0006629	BP	lipid metabolic process	9	5	14	237	0.319148	1	gene-GTA08_BOTSDO01182(GTA08_BOTSDO01182);gene-GTA08_BOTSDO01186(GTA08_BOTSDO01186);gene-GTA08_BOTSDO01193(GTA08_BOTSDO01193);gene-GTA08_BOTSDO05095(GTA08_BOTSDO05095);gene-GTA08_BOTSDO05268(GTA08_BOTSDO05268);gene-GTA08_BOTSDO05964(GTA08_BOTSDO05964);gene-GTA08_BOTSDO10582(GTA08_BOTSDO10582);gene-GTA08_BOTSDO12331(GTA08_BOTSDO12331);gene-GTA08_BOTSDO14098(GTA08_BOTSDO14098)	gene-GTA08_BOTSDO00332(GTA08_BOTSDO00332);gene-GTA08_BOTSDO01769(GTA08_BOTSDO01769);gene-GTA08_BOTSDO02102(GTA08_BOTSDO02102);gene-GTA08_BOTSDO07597(GTA08_BOTSDO07597);gene-GTA08_BOTSDO11702(GTA08_BOTSDO11702)
GO:1901617	BP	organic hydroxy compound biosynthetic process	0	2	2	23	0.328034	1	-	gene-GTA08_BOTSDO08782(GTA08_BOTSDO08782);gene-GTA08_BOTSDO13890(GTA08_BOTSDO13890)
GO:0000105	BP	histidine biosynthetic process	0	1	1	8	0.341513	1	-	gene-GTA08_BOTSDO04126(GTA08_BOTSDO04126)
GO:0006072	BP	glycerol-3-phosphate metabolic process	0	1	1	8	0.341513	1	-	gene-GTA08_BOTSDO13610(GTA08_BOTSDO13610)
GO:0006547	BP	histidine metabolic process	0	1	1	8	0.341513	1	-	gene-GTA08_BOTSDO04126(GTA08_BOTSDO04126)
GO:0006656	BP	phosphatidylcholine biosynthetic process	0	1	1	8	0.341513	1	-	gene-GTA08_BOTSDO01769(GTA08_BOTSDO01769)
GO:0009062	BP	fatty acid catabolic process	0	1	1	8	0.341513	1	-	gene-GTA08_BOTSDO07597(GTA08_BOTSDO07597)
GO:0009065	BP	glutamine family amino acid catabolic process	0	1	1	8	0.341513	1	-	gene-GTA08_BOTSDO11859(GTA08_BOTSDO11859)
GO:0010383	BP	cell wall polysaccharide metabolic process	0	1	1	8	0.341513	1	-	gene-GTA08_BOTSDO02133(GTA08_BOTSDO02133)
GO:0036003	BP	positive regulation of transcription from RNA polymerase II promoter in response to stress	1	0	1	8	0.341513	1	gene-GTA08_BOTSDO00957(GTA08_BOTSDO00957)	-
GO:0045862	BP	positive regulation of proteolysis	1	0	1	8	0.341513	1	gene-GTA08_BOTSDO00957(GTA08_BOTSDO00957)	-
GO:0051187	BP	cofactor catabolic process	0	1	1	8	0.341513	1	-	gene-GTA08_BOTSDO12189(GTA08_BOTSDO12189)
GO:0052646	BP	alditol phosphate metabolic process	0	1	1	8	0.341513	1	-	gene-GTA08_BOTSDO13610(GTA08_BOTSDO13610)
GO:0052803	BP	imidazole-containing compound metabolic process	0	1	1	8	0.341513	1	-	gene-GTA08_BOTSDO04126(GTA08_BOTSDO04126)
GO:1901292	BP	nucleoside phosphate catabolic process	0	1	1	8	0.341513	1	-	gene-GTA08_BOTSDO02221(GTA08_BOTSDO02221)
GO:0006073	BP	cellular glucan metabolic process	1	1	2	25	0.365673	1	gene-GTA08_BOTSDO10386(GTA08_BOTSDO10386)	gene-GTA08_BOTSDO08820(GTA08_BOTSDO08820)
GO:0016998	BP	cell wall macromolecule catabolic process	0	1	1	9	0.375046	1	-	gene-GTA08_BOTSDO02133(GTA08_BOTSDO02133)
GO:0018958	BP	phenol-containing compound metabolic process	0	1	1	9	0.375046	1	-	gene-GTA08_BOTSDO05765(GTA08_BOTSDO05765)
GO:0046470	BP	phosphatidylcholine metabolic process	0	1	1	9	0.375046	1	-	gene-GTA08_BOTSDO01769(GTA08_BOTSDO01769)
GO:0044042	BP	glucan metabolic process	1	1	2	27	0.402477	1	gene-GTA08_BOTSDO10386(GTA08_BOTSDO10386)	gene-GTA08_BOTSDO08820(GTA08_BOTSDO08820)
GO:0019752	BP	carboxylic acid metabolic process	3	17	20	367	0.406799	1	gene-GTA08_BOTSDO02628(GTA08_BOTSDO02628);gene-GTA08_BOTSDO04463(GTA08_BOTSDO04463);gene-GTA08_BOTSDO05095(GTA08_BOTSDO05095)	gene-GTA08_BOTSDO00156(GTA08_BOTSDO00156);gene-GTA08_BOTSDO00716(GTA08_BOTSDO00716);gene-GTA08_BOTSDO01981(GTA08_BOTSDO01981);gene-GTA08_BOTSDO02900(GTA08_BOTSDO02900);gene-GTA08_BOTSDO03575(GTA08_BOTSDO03575);gene-GTA08_BOTSDO04126(GTA08_BOTSDO04126);gene-GTA08_BOTSDO05670(GTA08_BOTSDO05670);gene-GTA08_BOTSDO06534(GTA08_BOTSDO06534);gene-GTA08_BOTSDO06978(GTA08_BOTSDO06978);gene-GTA08_BOTSDO0759…
GO:0006085	BP	acetyl-CoA biosynthetic process	1	0	1	10	0.406876	1	gene-GTA08_BOTSDO11135(GTA08_BOTSDO11135)	-
GO:0006563	BP	L-serine metabolic process	0	1	1	10	0.406876	1	-	gene-GTA08_BOTSDO11986(GTA08_BOTSDO11986)
GO:0035384	BP	thioester biosynthetic process	1	0	1	10	0.406876	1	gene-GTA08_BOTSDO11135(GTA08_BOTSDO11135)	-
GO:0070189	BP	kynurenine metabolic process	0	1	1	10	0.406876	1	-	gene-GTA08_BOTSDO05670(GTA08_BOTSDO05670)
GO:0071616	BP	acyl-CoA biosynthetic process	1	0	1	10	0.406876	1	gene-GTA08_BOTSDO11135(GTA08_BOTSDO11135)	-
GO:0005976	BP	polysaccharide metabolic process	1	3	4	64	0.41135	1	gene-GTA08_BOTSDO10386(GTA08_BOTSDO10386)	gene-GTA08_BOTSDO02133(GTA08_BOTSDO02133);gene-GTA08_BOTSDO02849(GTA08_BOTSDO02849);gene-GTA08_BOTSDO08820(GTA08_BOTSDO08820)
GO:0006569	BP	tryptophan catabolic process	0	1	1	11	0.437091	1	-	gene-GTA08_BOTSDO05670(GTA08_BOTSDO05670)
GO:0031126	BP	snoRNA 3'-end processing	0	1	1	11	0.437091	1	-	gene-GTA08_BOTSDO11445(GTA08_BOTSDO11445)
GO:0042402	BP	cellular biogenic amine catabolic process	0	1	1	11	0.437091	1	-	gene-GTA08_BOTSDO05670(GTA08_BOTSDO05670)
GO:0042436	BP	indole-containing compound catabolic process	0	1	1	11	0.437091	1	-	gene-GTA08_BOTSDO05670(GTA08_BOTSDO05670)
GO:0046218	BP	indolalkylamine catabolic process	0	1	1	11	0.437091	1	-	gene-GTA08_BOTSDO05670(GTA08_BOTSDO05670)
GO:0001678	BP	cellular glucose homeostasis	1	0	1	12	0.465771	1	gene-GTA08_BOTSDO04463(GTA08_BOTSDO04463)	-
GO:0006282	BP	regulation of DNA repair	1	0	1	12	0.465771	1	gene-GTA08_BOTSDO00957(GTA08_BOTSDO00957)	-
GO:0006560	BP	proline metabolic process	0	1	1	12	0.465771	1	-	gene-GTA08_BOTSDO11859(GTA08_BOTSDO11859)
GO:0009310	BP	amine catabolic process	0	1	1	12	0.465771	1	-	gene-GTA08_BOTSDO05670(GTA08_BOTSDO05670)
GO:0033500	BP	carbohydrate homeostasis	1	0	1	12	0.465771	1	gene-GTA08_BOTSDO04463(GTA08_BOTSDO04463)	-
GO:0042176	BP	regulation of protein catabolic process	1	0	1	12	0.465771	1	gene-GTA08_BOTSDO00957(GTA08_BOTSDO00957)	-
GO:0042593	BP	glucose homeostasis	1	0	1	12	0.465771	1	gene-GTA08_BOTSDO04463(GTA08_BOTSDO04463)	-
GO:0046835	BP	carbohydrate phosphorylation	1	0	1	12	0.465771	1	gene-GTA08_BOTSDO04463(GTA08_BOTSDO04463)	-
GO:2001020	BP	regulation of response to DNA damage stimulus	1	0	1	12	0.465771	1	gene-GTA08_BOTSDO00957(GTA08_BOTSDO00957)	-
GO:0043436	BP	oxoacid metabolic process	3	17	20	380	0.470595	1	gene-GTA08_BOTSDO02628(GTA08_BOTSDO02628);gene-GTA08_BOTSDO04463(GTA08_BOTSDO04463);gene-GTA08_BOTSDO05095(GTA08_BOTSDO05095)	gene-GTA08_BOTSDO00156(GTA08_BOTSDO00156);gene-GTA08_BOTSDO00716(GTA08_BOTSDO00716);gene-GTA08_BOTSDO01981(GTA08_BOTSDO01981);gene-GTA08_BOTSDO02900(GTA08_BOTSDO02900);gene-GTA08_BOTSDO03575(GTA08_BOTSDO03575);gene-GTA08_BOTSDO04126(GTA08_BOTSDO04126);gene-GTA08_BOTSDO05670(GTA08_BOTSDO05670);gene-GTA08_BOTSDO06534(GTA08_BOTSDO06534);gene-GTA08_BOTSDO06978(GTA08_BOTSDO06978);gene-GTA08_BOTSDO0759…
GO:0000272	BP	polysaccharide catabolic process	1	2	3	50	0.471255	1	gene-GTA08_BOTSDO10386(GTA08_BOTSDO10386)	gene-GTA08_BOTSDO02133(GTA08_BOTSDO02133);gene-GTA08_BOTSDO08820(GTA08_BOTSDO08820)
GO:0015672	BP	monovalent inorganic cation transport	0	3	3	50	0.471255	1	-	gene-GTA08_BOTSDO00110(GTA08_BOTSDO00110);gene-GTA08_BOTSDO00662(GTA08_BOTSDO00662);gene-GTA08_BOTSDO10310(GTA08_BOTSDO10310)
GO:0000271	BP	polysaccharide biosynthetic process	0	1	1	13	0.492995	1	-	gene-GTA08_BOTSDO02849(GTA08_BOTSDO02849)
GO:0006084	BP	acetyl-CoA metabolic process	1	0	1	13	0.492995	1	gene-GTA08_BOTSDO11135(GTA08_BOTSDO11135)	-
GO:0006904	BP	vesicle docking involved in exocytosis	0	1	1	13	0.492995	1	-	gene-GTA08_BOTSDO09246(GTA08_BOTSDO09246)
GO:0016226	BP	iron-sulfur cluster assembly	1	0	1	13	0.492995	1	gene-GTA08_BOTSDO01396(GTA08_BOTSDO01396)	-
GO:0031163	BP	metallo-sulfur cluster assembly	1	0	1	13	0.492995	1	gene-GTA08_BOTSDO01396(GTA08_BOTSDO01396)	-
GO:0043144	BP	snoRNA processing	0	1	1	13	0.492995	1	-	gene-GTA08_BOTSDO11445(GTA08_BOTSDO11445)
GO:0043618	BP	regulation of transcription from RNA polymerase II promoter in response to stress	1	0	1	13	0.492995	1	gene-GTA08_BOTSDO00957(GTA08_BOTSDO00957)	-
GO:0043620	BP	regulation of DNA-templated transcription in response to stress	1	0	1	13	0.492995	1	gene-GTA08_BOTSDO00957(GTA08_BOTSDO00957)	-
GO:0044550	BP	secondary metabolite biosynthetic process	0	1	1	13	0.492995	1	-	gene-GTA08_BOTSDO00716(GTA08_BOTSDO00716)
GO:0072593	BP	reactive oxygen species metabolic process	0	1	1	13	0.492995	1	-	gene-GTA08_BOTSDO12189(GTA08_BOTSDO12189)
GO:0140029	BP	exocytic process	0	1	1	13	0.492995	1	-	gene-GTA08_BOTSDO09246(GTA08_BOTSDO09246)
GO:0030001	BP	metal ion transport	1	3	4	73	0.513197	1	gene-GTA08_BOTSDO03968(GTA08_BOTSDO03968)	gene-GTA08_BOTSDO00662(GTA08_BOTSDO00662);gene-GTA08_BOTSDO05395(GTA08_BOTSDO05395);gene-GTA08_BOTSDO10310(GTA08_BOTSDO10310)
GO:0006378	BP	mRNA polyadenylation	0	1	1	14	0.518835	1	-	gene-GTA08_BOTSDO11445(GTA08_BOTSDO11445)
GO:0009070	BP	serine family amino acid biosynthetic process	0	1	1	14	0.518835	1	-	gene-GTA08_BOTSDO11986(GTA08_BOTSDO11986)
GO:0033866	BP	nucleoside bisphosphate biosynthetic process	1	0	1	14	0.518835	1	gene-GTA08_BOTSDO11135(GTA08_BOTSDO11135)	-
GO:0034030	BP	ribonucleoside bisphosphate biosynthetic process	1	0	1	14	0.518835	1	gene-GTA08_BOTSDO11135(GTA08_BOTSDO11135)	-
GO:0034033	BP	purine nucleoside bisphosphate biosynthetic process	1	0	1	14	0.518835	1	gene-GTA08_BOTSDO11135(GTA08_BOTSDO11135)	-
GO:0043631	BP	RNA polyadenylation	0	1	1	14	0.518835	1	-	gene-GTA08_BOTSDO11445(GTA08_BOTSDO11445)
GO:0006754	BP	ATP biosynthetic process	0	1	1	15	0.543363	1	-	gene-GTA08_BOTSDO00110(GTA08_BOTSDO00110)
GO:0009082	BP	branched-chain amino acid biosynthetic process	0	1	1	15	0.543363	1	-	gene-GTA08_BOTSDO11714(GTA08_BOTSDO11714)
GO:0016074	BP	snoRNA metabolic process	0	1	1	15	0.543363	1	-	gene-GTA08_BOTSDO11445(GTA08_BOTSDO11445)
GO:0019748	BP	secondary metabolic process	0	1	1	15	0.543363	1	-	gene-GTA08_BOTSDO00716(GTA08_BOTSDO00716)
GO:0030162	BP	regulation of proteolysis	1	0	1	15	0.543363	1	gene-GTA08_BOTSDO00957(GTA08_BOTSDO00957)	-
GO:0031331	BP	positive regulation of cellular catabolic process	1	0	1	15	0.543363	1	gene-GTA08_BOTSDO00957(GTA08_BOTSDO00957)	-
GO:0046700	BP	heterocycle catabolic process	0	5	5	97	0.55334	1	-	gene-GTA08_BOTSDO02033(GTA08_BOTSDO02033);gene-GTA08_BOTSDO02221(GTA08_BOTSDO02221);gene-GTA08_BOTSDO05670(GTA08_BOTSDO05670);gene-GTA08_BOTSDO11445(GTA08_BOTSDO11445);gene-GTA08_BOTSDO11859(GTA08_BOTSDO11859)
GO:0002097	BP	tRNA wobble base modification	1	0	1	16	0.566645	1	gene-GTA08_BOTSDO01396(GTA08_BOTSDO01396)	-
GO:0002098	BP	tRNA wobble uridine modification	1	0	1	16	0.566645	1	gene-GTA08_BOTSDO01396(GTA08_BOTSDO01396)	-
GO:0009145	BP	purine nucleoside triphosphate biosynthetic process	0	1	1	16	0.566645	1	-	gene-GTA08_BOTSDO00110(GTA08_BOTSDO00110)
GO:0009206	BP	purine ribonucleoside triphosphate biosynthetic process	0	1	1	16	0.566645	1	-	gene-GTA08_BOTSDO00110(GTA08_BOTSDO00110)
GO:0009896	BP	positive regulation of catabolic process	1	0	1	16	0.566645	1	gene-GTA08_BOTSDO00957(GTA08_BOTSDO00957)	-
GO:0044036	BP	cell wall macromolecule metabolic process	0	1	1	16	0.566645	1	-	gene-GTA08_BOTSDO02133(GTA08_BOTSDO02133)
GO:0048278	BP	vesicle docking	0	1	1	16	0.566645	1	-	gene-GTA08_BOTSDO09246(GTA08_BOTSDO09246)
GO:0072329	BP	monocarboxylic acid catabolic process	0	1	1	16	0.566645	1	-	gene-GTA08_BOTSDO07597(GTA08_BOTSDO07597)
GO:0070887	BP	cellular response to chemical stimulus	3	4	7	141	0.581852	1	gene-GTA08_BOTSDO05830(GTA08_BOTSDO05830);gene-GTA08_BOTSDO09581(GTA08_BOTSDO09581);gene-GTA08_BOTSDO13964(GTA08_BOTSDO13964)	gene-GTA08_BOTSDO01875(GTA08_BOTSDO01875);gene-GTA08_BOTSDO01877(GTA08_BOTSDO01877);gene-GTA08_BOTSDO02767(GTA08_BOTSDO02767);gene-GTA08_BOTSDO12189(GTA08_BOTSDO12189)
GO:0006096	BP	glycolytic process	1	0	1	17	0.588743	1	gene-GTA08_BOTSDO04463(GTA08_BOTSDO04463)	-
GO:0006541	BP	glutamine metabolic process	0	1	1	17	0.588743	1	-	gene-GTA08_BOTSDO01981(GTA08_BOTSDO01981)
GO:0006568	BP	tryptophan metabolic process	0	1	1	17	0.588743	1	-	gene-GTA08_BOTSDO05670(GTA08_BOTSDO05670)
GO:0006586	BP	indolalkylamine metabolic process	0	1	1	17	0.588743	1	-	gene-GTA08_BOTSDO05670(GTA08_BOTSDO05670)
GO:0006637	BP	acyl-CoA metabolic process	1	0	1	17	0.588743	1	gene-GTA08_BOTSDO11135(GTA08_BOTSDO11135)	-
GO:0006757	BP	ATP generation from ADP	1	0	1	17	0.588743	1	gene-GTA08_BOTSDO04463(GTA08_BOTSDO04463)	-
GO:0009144	BP	purine nucleoside triphosphate metabolic process	0	1	1	17	0.588743	1	-	gene-GTA08_BOTSDO00110(GTA08_BOTSDO00110)
GO:0009205	BP	purine ribonucleoside triphosphate metabolic process	0	1	1	17	0.588743	1	-	gene-GTA08_BOTSDO00110(GTA08_BOTSDO00110)
GO:0034404	BP	nucleobase-containing small molecule biosynthetic process	0	1	1	17	0.588743	1	-	gene-GTA08_BOTSDO02221(GTA08_BOTSDO02221)
GO:0035383	BP	thioester metabolic process	1	0	1	17	0.588743	1	gene-GTA08_BOTSDO11135(GTA08_BOTSDO11135)	-
GO:0042430	BP	indole-containing compound metabolic process	0	1	1	17	0.588743	1	-	gene-GTA08_BOTSDO05670(GTA08_BOTSDO05670)
GO:0016052	BP	carbohydrate catabolic process	2	2	4	82	0.606255	1	gene-GTA08_BOTSDO04463(GTA08_BOTSDO04463);gene-GTA08_BOTSDO10386(GTA08_BOTSDO10386)	gene-GTA08_BOTSDO02133(GTA08_BOTSDO02133);gene-GTA08_BOTSDO08820(GTA08_BOTSDO08820)
GO:0006165	BP	nucleoside diphosphate phosphorylation	1	0	1	18	0.609717	1	gene-GTA08_BOTSDO04463(GTA08_BOTSDO04463)	-
GO:0009142	BP	nucleoside triphosphate biosynthetic process	0	1	1	18	0.609717	1	-	gene-GTA08_BOTSDO00110(GTA08_BOTSDO00110)
GO:0009201	BP	ribonucleoside triphosphate biosynthetic process	0	1	1	18	0.609717	1	-	gene-GTA08_BOTSDO00110(GTA08_BOTSDO00110)
GO:0009135	BP	purine nucleoside diphosphate metabolic process	1	0	1	19	0.629626	1	gene-GTA08_BOTSDO04463(GTA08_BOTSDO04463)	-
GO:0009179	BP	purine ribonucleoside diphosphate metabolic process	1	0	1	19	0.629626	1	gene-GTA08_BOTSDO04463(GTA08_BOTSDO04463)	-
GO:0009185	BP	ribonucleoside diphosphate metabolic process	1	0	1	19	0.629626	1	gene-GTA08_BOTSDO04463(GTA08_BOTSDO04463)	-
GO:0009199	BP	ribonucleoside triphosphate metabolic process	0	1	1	19	0.629626	1	-	gene-GTA08_BOTSDO00110(GTA08_BOTSDO00110)
GO:0022406	BP	membrane docking	0	1	1	19	0.629626	1	-	gene-GTA08_BOTSDO09246(GTA08_BOTSDO09246)
GO:0046031	BP	ADP metabolic process	1	0	1	19	0.629626	1	gene-GTA08_BOTSDO04463(GTA08_BOTSDO04463)	-
GO:0140056	BP	organelle localization by membrane tethering	0	1	1	19	0.629626	1	-	gene-GTA08_BOTSDO09246(GTA08_BOTSDO09246)
GO:0006887	BP	exocytosis	0	1	1	20	0.648522	1	-	gene-GTA08_BOTSDO09246(GTA08_BOTSDO09246)
GO:0009069	BP	serine family amino acid metabolic process	0	1	1	20	0.648522	1	-	gene-GTA08_BOTSDO11986(GTA08_BOTSDO11986)
GO:0044281	BP	small molecule metabolic process	5	23	28	582	0.654164	1	gene-GTA08_BOTSDO02628(GTA08_BOTSDO02628);gene-GTA08_BOTSDO03374(GTA08_BOTSDO03374);gene-GTA08_BOTSDO04463(GTA08_BOTSDO04463);gene-GTA08_BOTSDO05095(GTA08_BOTSDO05095);gene-GTA08_BOTSDO11135(GTA08_BOTSDO11135)	gene-GTA08_BOTSDO00110(GTA08_BOTSDO00110);gene-GTA08_BOTSDO00156(GTA08_BOTSDO00156);gene-GTA08_BOTSDO00716(GTA08_BOTSDO00716);gene-GTA08_BOTSDO01981(GTA08_BOTSDO01981);gene-GTA08_BOTSDO02221(GTA08_BOTSDO02221);gene-GTA08_BOTSDO02900(GTA08_BOTSDO02900);gene-GTA08_BOTSDO03575(GTA08_BOTSDO03575);gene-GTA08_BOTSDO04126(GTA08_BOTSDO04126);gene-GTA08_BOTSDO04147(GTA08_BOTSDO04147);gene-GTA08_BOTSDO0567…
GO:0009086	BP	methionine biosynthetic process	0	1	1	21	0.666457	1	-	gene-GTA08_BOTSDO02900(GTA08_BOTSDO02900)
GO:0072330	BP	monocarboxylic acid biosynthetic process	1	1	2	45	0.675392	1	gene-GTA08_BOTSDO05095(GTA08_BOTSDO05095)	gene-GTA08_BOTSDO00716(GTA08_BOTSDO00716)
GO:0034655	BP	nucleobase-containing compound catabolic process	0	3	3	68	0.680069	1	-	gene-GTA08_BOTSDO02033(GTA08_BOTSDO02033);gene-GTA08_BOTSDO02221(GTA08_BOTSDO02221);gene-GTA08_BOTSDO11445(GTA08_BOTSDO11445)
GO:0017144	BP	drug metabolic process	0	5	5	112	0.681058	1	-	gene-GTA08_BOTSDO00110(GTA08_BOTSDO00110);gene-GTA08_BOTSDO00716(GTA08_BOTSDO00716);gene-GTA08_BOTSDO06534(GTA08_BOTSDO06534);gene-GTA08_BOTSDO07597(GTA08_BOTSDO07597);gene-GTA08_BOTSDO12189(GTA08_BOTSDO12189)
GO:0006099	BP	tricarboxylic acid cycle	0	1	1	22	0.683479	1	-	gene-GTA08_BOTSDO07597(GTA08_BOTSDO07597)
GO:0006555	BP	methionine metabolic process	0	1	1	22	0.683479	1	-	gene-GTA08_BOTSDO02900(GTA08_BOTSDO02900)
GO:0006576	BP	cellular biogenic amine metabolic process	0	1	1	22	0.683479	1	-	gene-GTA08_BOTSDO05670(GTA08_BOTSDO05670)
GO:0009132	BP	nucleoside diphosphate metabolic process	1	0	1	22	0.683479	1	gene-GTA08_BOTSDO04463(GTA08_BOTSDO04463)	-
GO:0009141	BP	nucleoside triphosphate metabolic process	0	1	1	22	0.683479	1	-	gene-GTA08_BOTSDO00110(GTA08_BOTSDO00110)
GO:0031124	BP	mRNA 3'-end processing	0	1	1	22	0.683479	1	-	gene-GTA08_BOTSDO11445(GTA08_BOTSDO11445)
GO:0032940	BP	secretion by cell	0	1	1	22	0.683479	1	-	gene-GTA08_BOTSDO09246(GTA08_BOTSDO09246)
GO:0033865	BP	nucleoside bisphosphate metabolic process	1	0	1	22	0.683479	1	gene-GTA08_BOTSDO11135(GTA08_BOTSDO11135)	-
GO:0033875	BP	ribonucleoside bisphosphate metabolic process	1	0	1	22	0.683479	1	gene-GTA08_BOTSDO11135(GTA08_BOTSDO11135)	-
GO:0034032	BP	purine nucleoside bisphosphate metabolic process	1	0	1	22	0.683479	1	gene-GTA08_BOTSDO11135(GTA08_BOTSDO11135)	-
GO:0043628	BP	ncRNA 3'-end processing	0	1	1	22	0.683479	1	-	gene-GTA08_BOTSDO11445(GTA08_BOTSDO11445)
GO:0046903	BP	secretion	0	1	1	22	0.683479	1	-	gene-GTA08_BOTSDO09246(GTA08_BOTSDO09246)
GO:0080135	BP	regulation of cellular response to stress	1	0	1	22	0.683479	1	gene-GTA08_BOTSDO00957(GTA08_BOTSDO00957)	-
GO:1901136	BP	carbohydrate derivative catabolic process	0	1	1	22	0.683479	1	-	gene-GTA08_BOTSDO02221(GTA08_BOTSDO02221)
GO:0009064	BP	glutamine family amino acid metabolic process	0	2	2	46	0.687138	1	-	gene-GTA08_BOTSDO01981(GTA08_BOTSDO01981);gene-GTA08_BOTSDO11859(GTA08_BOTSDO11859)
GO:0046034	BP	ATP metabolic process	1	1	2	46	0.687138	1	gene-GTA08_BOTSDO04463(GTA08_BOTSDO04463)	gene-GTA08_BOTSDO00110(GTA08_BOTSDO00110)
GO:0098662	BP	inorganic cation transmembrane transport	0	3	3	70	0.699061	1	-	gene-GTA08_BOTSDO00110(GTA08_BOTSDO00110);gene-GTA08_BOTSDO00662(GTA08_BOTSDO00662);gene-GTA08_BOTSDO10310(GTA08_BOTSDO10310)
GO:0080134	BP	regulation of response to stress	1	0	1	23	0.699636	1	gene-GTA08_BOTSDO00957(GTA08_BOTSDO00957)	-
GO:0008610	BP	lipid biosynthetic process	4	1	5	115	0.703444	1	gene-GTA08_BOTSDO01182(GTA08_BOTSDO01182);gene-GTA08_BOTSDO01186(GTA08_BOTSDO01186);gene-GTA08_BOTSDO01193(GTA08_BOTSDO01193);gene-GTA08_BOTSDO05095(GTA08_BOTSDO05095)	gene-GTA08_BOTSDO01769(GTA08_BOTSDO01769)
GO:0044270	BP	cellular nitrogen compound catabolic process	0	4	4	93	0.704074	1	-	gene-GTA08_BOTSDO02033(GTA08_BOTSDO02033);gene-GTA08_BOTSDO02221(GTA08_BOTSDO02221);gene-GTA08_BOTSDO05670(GTA08_BOTSDO05670);gene-GTA08_BOTSDO11445(GTA08_BOTSDO11445)
GO:0006631	BP	fatty acid metabolic process	1	1	2	48	0.709583	1	gene-GTA08_BOTSDO05095(GTA08_BOTSDO05095)	gene-GTA08_BOTSDO07597(GTA08_BOTSDO07597)
GO:0006090	BP	pyruvate metabolic process	1	0	1	24	0.714971	1	gene-GTA08_BOTSDO04463(GTA08_BOTSDO04463)	-
GO:0015698	BP	inorganic anion transport	0	1	1	24	0.714971	1	-	gene-GTA08_BOTSDO09892(GTA08_BOTSDO09892)
GO:0031329	BP	regulation of cellular catabolic process	1	0	1	24	0.714971	1	gene-GTA08_BOTSDO00957(GTA08_BOTSDO00957)	-
GO:0140352	BP	export from cell	0	1	1	24	0.714971	1	-	gene-GTA08_BOTSDO09246(GTA08_BOTSDO09246)
GO:0032535	BP	regulation of cellular component size	1	0	1	25	0.729525	1	gene-GTA08_BOTSDO06692(GTA08_BOTSDO06692)	-
GO:0046939	BP	nucleotide phosphorylation	1	0	1	25	0.729525	1	gene-GTA08_BOTSDO04463(GTA08_BOTSDO04463)	-
GO:0090066	BP	regulation of anatomical structure size	1	0	1	25	0.729525	1	gene-GTA08_BOTSDO06692(GTA08_BOTSDO06692)	-
GO:0006164	BP	purine nucleotide biosynthetic process	1	1	2	50	0.73067	1	gene-GTA08_BOTSDO11135(GTA08_BOTSDO11135)	gene-GTA08_BOTSDO00110(GTA08_BOTSDO00110)
GO:0008654	BP	phospholipid biosynthetic process	1	1	2	50	0.73067	1	gene-GTA08_BOTSDO01182(GTA08_BOTSDO01182)	gene-GTA08_BOTSDO01769(GTA08_BOTSDO01769)
GO:0009152	BP	purine ribonucleotide biosynthetic process	1	1	2	50	0.73067	1	gene-GTA08_BOTSDO11135(GTA08_BOTSDO11135)	gene-GTA08_BOTSDO00110(GTA08_BOTSDO00110)
GO:0044272	BP	sulfur compound biosynthetic process	1	1	2	51	0.740719	1	gene-GTA08_BOTSDO11135(GTA08_BOTSDO11135)	gene-GTA08_BOTSDO02900(GTA08_BOTSDO02900)
GO:0098660	BP	inorganic ion transmembrane transport	0	3	3	75	0.742782	1	-	gene-GTA08_BOTSDO00110(GTA08_BOTSDO00110);gene-GTA08_BOTSDO00662(GTA08_BOTSDO00662);gene-GTA08_BOTSDO10310(GTA08_BOTSDO10310)
GO:0000097	BP	sulfur amino acid biosynthetic process	0	1	1	26	0.743338	1	-	gene-GTA08_BOTSDO02900(GTA08_BOTSDO02900)
GO:0042180	BP	cellular ketone metabolic process	0	1	1	26	0.743338	1	-	gene-GTA08_BOTSDO05670(GTA08_BOTSDO05670)
GO:0006163	BP	purine nucleotide metabolic process	2	1	3	76	0.750894	1	gene-GTA08_BOTSDO04463(GTA08_BOTSDO04463);gene-GTA08_BOTSDO11135(GTA08_BOTSDO11135)	gene-GTA08_BOTSDO00110(GTA08_BOTSDO00110)
GO:0009150	BP	purine ribonucleotide metabolic process	2	1	3	76	0.750894	1	gene-GTA08_BOTSDO04463(GTA08_BOTSDO04463);gene-GTA08_BOTSDO11135(GTA08_BOTSDO11135)	gene-GTA08_BOTSDO00110(GTA08_BOTSDO00110)
GO:0006950	BP	response to stress	12	3	15	340	0.755694	1	gene-GTA08_BOTSDO00957(GTA08_BOTSDO00957);gene-GTA08_BOTSDO01201(GTA08_BOTSDO01201);gene-GTA08_BOTSDO04384(GTA08_BOTSDO04384);gene-GTA08_BOTSDO05091(GTA08_BOTSDO05091);gene-GTA08_BOTSDO05830(GTA08_BOTSDO05830);gene-GTA08_BOTSDO06402(GTA08_BOTSDO06402);gene-GTA08_BOTSDO08362(GTA08_BOTSDO08362);gene-GTA08_BOTSDO08703(GTA08_BOTSDO08703);gene-GTA08_BOTSDO09581(GTA08_BOTSDO09581);gene-GTA08_BOTSDO1058…	gene-GTA08_BOTSDO02767(GTA08_BOTSDO02767);gene-GTA08_BOTSDO05341(GTA08_BOTSDO05341);gene-GTA08_BOTSDO12189(GTA08_BOTSDO12189)
GO:0009073	BP	aromatic amino acid family biosynthetic process	0	1	1	27	0.756448	1	-	gene-GTA08_BOTSDO04126(GTA08_BOTSDO04126)
GO:0044106	BP	cellular amine metabolic process	0	1	1	27	0.756448	1	-	gene-GTA08_BOTSDO05670(GTA08_BOTSDO05670)
GO:0044255	BP	cellular lipid metabolic process	5	2	7	168	0.759243	1	gene-GTA08_BOTSDO01182(GTA08_BOTSDO01182);gene-GTA08_BOTSDO01186(GTA08_BOTSDO01186);gene-GTA08_BOTSDO01193(GTA08_BOTSDO01193);gene-GTA08_BOTSDO05095(GTA08_BOTSDO05095);gene-GTA08_BOTSDO14098(GTA08_BOTSDO14098)	gene-GTA08_BOTSDO01769(GTA08_BOTSDO01769);gene-GTA08_BOTSDO07597(GTA08_BOTSDO07597)
GO:0009260	BP	ribonucleotide biosynthetic process	1	1	2	54	0.768965	1	gene-GTA08_BOTSDO11135(GTA08_BOTSDO11135)	gene-GTA08_BOTSDO00110(GTA08_BOTSDO00110)
GO:0006644	BP	phospholipid metabolic process	2	1	3	79	0.774008	1	gene-GTA08_BOTSDO01182(GTA08_BOTSDO01182);gene-GTA08_BOTSDO14098(GTA08_BOTSDO14098)	gene-GTA08_BOTSDO01769(GTA08_BOTSDO01769)
GO:0008652	BP	cellular amino acid biosynthetic process	0	4	4	103	0.776684	1	-	gene-GTA08_BOTSDO02900(GTA08_BOTSDO02900);gene-GTA08_BOTSDO04126(GTA08_BOTSDO04126);gene-GTA08_BOTSDO11714(GTA08_BOTSDO11714);gene-GTA08_BOTSDO11986(GTA08_BOTSDO11986)
GO:0000122	BP	negative regulation of transcription by RNA polymerase II	1	0	1	29	0.780699	1	gene-GTA08_BOTSDO00957(GTA08_BOTSDO00957)	-
GO:0006633	BP	fatty acid biosynthetic process	1	0	1	29	0.780699	1	gene-GTA08_BOTSDO05095(GTA08_BOTSDO05095)	-
GO:0009894	BP	regulation of catabolic process	1	0	1	29	0.780699	1	gene-GTA08_BOTSDO00957(GTA08_BOTSDO00957)	-
GO:0051052	BP	regulation of DNA metabolic process	1	0	1	29	0.780699	1	gene-GTA08_BOTSDO00957(GTA08_BOTSDO00957)	-
GO:0009259	BP	ribonucleotide metabolic process	2	1	3	80	0.781313	1	gene-GTA08_BOTSDO04463(GTA08_BOTSDO04463);gene-GTA08_BOTSDO11135(GTA08_BOTSDO11135)	gene-GTA08_BOTSDO00110(GTA08_BOTSDO00110)
GO:0032787	BP	monocarboxylic acid metabolic process	2	2	4	104	0.783108	1	gene-GTA08_BOTSDO04463(GTA08_BOTSDO04463);gene-GTA08_BOTSDO05095(GTA08_BOTSDO05095)	gene-GTA08_BOTSDO00716(GTA08_BOTSDO00716);gene-GTA08_BOTSDO07597(GTA08_BOTSDO07597)
GO:0000096	BP	sulfur amino acid metabolic process	0	1	1	30	0.791906	1	-	gene-GTA08_BOTSDO02900(GTA08_BOTSDO02900)
GO:0009067	BP	aspartate family amino acid biosynthetic process	0	1	1	30	0.791906	1	-	gene-GTA08_BOTSDO02900(GTA08_BOTSDO02900)
GO:0044283	BP	small molecule biosynthetic process	1	8	9	219	0.791961	1	gene-GTA08_BOTSDO05095(GTA08_BOTSDO05095)	gene-GTA08_BOTSDO00716(GTA08_BOTSDO00716);gene-GTA08_BOTSDO02221(GTA08_BOTSDO02221);gene-GTA08_BOTSDO02900(GTA08_BOTSDO02900);gene-GTA08_BOTSDO04126(GTA08_BOTSDO04126);gene-GTA08_BOTSDO08782(GTA08_BOTSDO08782);gene-GTA08_BOTSDO11714(GTA08_BOTSDO11714);gene-GTA08_BOTSDO11986(GTA08_BOTSDO11986);gene-GTA08_BOTSDO13890(GTA08_BOTSDO13890)
GO:0046390	BP	ribose phosphate biosynthetic process	1	1	2	57	0.7945	1	gene-GTA08_BOTSDO11135(GTA08_BOTSDO11135)	gene-GTA08_BOTSDO00110(GTA08_BOTSDO00110)
GO:0019693	BP	ribose phosphate metabolic process	2	1	3	83	0.802069	1	gene-GTA08_BOTSDO04463(GTA08_BOTSDO04463);gene-GTA08_BOTSDO11135(GTA08_BOTSDO11135)	gene-GTA08_BOTSDO00110(GTA08_BOTSDO00110)
GO:0072522	BP	purine-containing compound biosynthetic process	1	1	2	58	0.802442	1	gene-GTA08_BOTSDO11135(GTA08_BOTSDO11135)	gene-GTA08_BOTSDO00110(GTA08_BOTSDO00110)
GO:0016051	BP	carbohydrate biosynthetic process	0	1	1	31	0.802543	1	-	gene-GTA08_BOTSDO02849(GTA08_BOTSDO02849)
GO:1902600	BP	proton transmembrane transport	0	1	1	31	0.802543	1	-	gene-GTA08_BOTSDO00110(GTA08_BOTSDO00110)
GO:1901607	BP	alpha-amino acid biosynthetic process	0	3	3	84	0.808612	1	-	gene-GTA08_BOTSDO02900(GTA08_BOTSDO02900);gene-GTA08_BOTSDO04126(GTA08_BOTSDO04126);gene-GTA08_BOTSDO11986(GTA08_BOTSDO11986)
GO:0042221	BP	response to chemical	3	4	7	178	0.809146	1	gene-GTA08_BOTSDO05830(GTA08_BOTSDO05830);gene-GTA08_BOTSDO09581(GTA08_BOTSDO09581);gene-GTA08_BOTSDO13964(GTA08_BOTSDO13964)	gene-GTA08_BOTSDO01875(GTA08_BOTSDO01875);gene-GTA08_BOTSDO01877(GTA08_BOTSDO01877);gene-GTA08_BOTSDO02767(GTA08_BOTSDO02767);gene-GTA08_BOTSDO12189(GTA08_BOTSDO12189)
GO:0006289	BP	nucleotide-excision repair	0	1	1	32	0.812637	1	-	gene-GTA08_BOTSDO05341(GTA08_BOTSDO05341)
GO:0009066	BP	aspartate family amino acid metabolic process	0	1	1	33	0.822217	1	-	gene-GTA08_BOTSDO02900(GTA08_BOTSDO02900)
GO:0016053	BP	organic acid biosynthetic process	1	5	6	158	0.822728	1	gene-GTA08_BOTSDO05095(GTA08_BOTSDO05095)	gene-GTA08_BOTSDO00716(GTA08_BOTSDO00716);gene-GTA08_BOTSDO02900(GTA08_BOTSDO02900);gene-GTA08_BOTSDO04126(GTA08_BOTSDO04126);gene-GTA08_BOTSDO11714(GTA08_BOTSDO11714);gene-GTA08_BOTSDO11986(GTA08_BOTSDO11986)
GO:0046394	BP	carboxylic acid biosynthetic process	1	5	6	158	0.822728	1	gene-GTA08_BOTSDO05095(GTA08_BOTSDO05095)	gene-GTA08_BOTSDO00716(GTA08_BOTSDO00716);gene-GTA08_BOTSDO02900(GTA08_BOTSDO02900);gene-GTA08_BOTSDO04126(GTA08_BOTSDO04126);gene-GTA08_BOTSDO11714(GTA08_BOTSDO11714);gene-GTA08_BOTSDO11986(GTA08_BOTSDO11986)
GO:0000956	BP	nuclear-transcribed mRNA catabolic process	0	1	1	34	0.831309	1	-	gene-GTA08_BOTSDO11445(GTA08_BOTSDO11445)
GO:0006414	BP	translational elongation	0	1	1	34	0.831309	1	-	gene-GTA08_BOTSDO08537(GTA08_BOTSDO08537)
GO:0006790	BP	sulfur compound metabolic process	2	1	3	89	0.838651	1	gene-GTA08_BOTSDO01396(GTA08_BOTSDO01396);gene-GTA08_BOTSDO11135(GTA08_BOTSDO11135)	gene-GTA08_BOTSDO02900(GTA08_BOTSDO02900)
GO:0046474	BP	glycerophospholipid biosynthetic process	0	1	1	36	0.848125	1	-	gene-GTA08_BOTSDO01769(GTA08_BOTSDO01769)
GO:0031123	BP	RNA 3'-end processing	0	1	1	37	0.855896	1	-	gene-GTA08_BOTSDO11445(GTA08_BOTSDO11445)
GO:0006812	BP	cation transport	1	4	5	143	0.860434	1	gene-GTA08_BOTSDO03968(GTA08_BOTSDO03968)	gene-GTA08_BOTSDO00110(GTA08_BOTSDO00110);gene-GTA08_BOTSDO00662(GTA08_BOTSDO00662);gene-GTA08_BOTSDO05395(GTA08_BOTSDO05395);gene-GTA08_BOTSDO10310(GTA08_BOTSDO10310)
GO:0006402	BP	mRNA catabolic process	0	1	1	38	0.86327	1	-	gene-GTA08_BOTSDO11445(GTA08_BOTSDO11445)
GO:0072521	BP	purine-containing compound metabolic process	2	1	3	94	0.864543	1	gene-GTA08_BOTSDO04463(GTA08_BOTSDO04463);gene-GTA08_BOTSDO11135(GTA08_BOTSDO11135)	gene-GTA08_BOTSDO00110(GTA08_BOTSDO00110)
GO:0045017	BP	glycerolipid biosynthetic process	0	1	1	39	0.870269	1	-	gene-GTA08_BOTSDO01769(GTA08_BOTSDO01769)
GO:0009117	BP	nucleotide metabolic process	2	2	4	121	0.871305	1	gene-GTA08_BOTSDO04463(GTA08_BOTSDO04463);gene-GTA08_BOTSDO11135(GTA08_BOTSDO11135)	gene-GTA08_BOTSDO00110(GTA08_BOTSDO00110);gene-GTA08_BOTSDO02221(GTA08_BOTSDO02221)
GO:0006753	BP	nucleoside phosphate metabolic process	2	2	4	122	0.875371	1	gene-GTA08_BOTSDO04463(GTA08_BOTSDO04463);gene-GTA08_BOTSDO11135(GTA08_BOTSDO11135)	gene-GTA08_BOTSDO00110(GTA08_BOTSDO00110);gene-GTA08_BOTSDO02221(GTA08_BOTSDO02221)
GO:0098655	BP	cation transmembrane transport	0	3	3	98	0.882561	1	-	gene-GTA08_BOTSDO00110(GTA08_BOTSDO00110);gene-GTA08_BOTSDO00662(GTA08_BOTSDO00662);gene-GTA08_BOTSDO10310(GTA08_BOTSDO10310)
GO:0009060	BP	aerobic respiration	0	1	1	41	0.883212	1	-	gene-GTA08_BOTSDO07597(GTA08_BOTSDO07597)
GO:0006820	BP	anion transport	2	2	4	127	0.894078	1	gene-GTA08_BOTSDO00735(GTA08_BOTSDO00735);gene-GTA08_BOTSDO04858(GTA08_BOTSDO04858)	gene-GTA08_BOTSDO08019(GTA08_BOTSDO08019);gene-GTA08_BOTSDO09892(GTA08_BOTSDO09892)
GO:1903825	BP	organic acid transmembrane transport	2	0	2	74	0.897111	1	gene-GTA08_BOTSDO00735(GTA08_BOTSDO00735);gene-GTA08_BOTSDO04858(GTA08_BOTSDO04858)	-
GO:1905039	BP	carboxylic acid transmembrane transport	2	0	2	74	0.897111	1	gene-GTA08_BOTSDO00735(GTA08_BOTSDO00735);gene-GTA08_BOTSDO04858(GTA08_BOTSDO04858)	-
GO:0019637	BP	organophosphate metabolic process	4	4	8	229	0.904323	1	gene-GTA08_BOTSDO01182(GTA08_BOTSDO01182);gene-GTA08_BOTSDO04463(GTA08_BOTSDO04463);gene-GTA08_BOTSDO11135(GTA08_BOTSDO11135);gene-GTA08_BOTSDO14098(GTA08_BOTSDO14098)	gene-GTA08_BOTSDO00110(GTA08_BOTSDO00110);gene-GTA08_BOTSDO01769(GTA08_BOTSDO01769);gene-GTA08_BOTSDO02221(GTA08_BOTSDO02221);gene-GTA08_BOTSDO13610(GTA08_BOTSDO13610)
GO:0006400	BP	tRNA modification	1	0	1	45	0.905364	1	gene-GTA08_BOTSDO01396(GTA08_BOTSDO01396)	-
GO:0045229	BP	external encapsulating structure organization	1	0	1	45	0.905364	1	gene-GTA08_BOTSDO11906(GTA08_BOTSDO11906)	-
GO:0071555	BP	cell wall organization	1	0	1	45	0.905364	1	gene-GTA08_BOTSDO11906(GTA08_BOTSDO11906)	-
GO:0071554	BP	cell wall organization or biogenesis	1	1	2	76	0.905406	1	gene-GTA08_BOTSDO11906(GTA08_BOTSDO11906)	gene-GTA08_BOTSDO02133(GTA08_BOTSDO02133)
GO:0044265	BP	cellular macromolecule catabolic process	1	4	5	161	0.919085	1	gene-GTA08_BOTSDO00957(GTA08_BOTSDO00957)	gene-GTA08_BOTSDO02033(GTA08_BOTSDO02033);gene-GTA08_BOTSDO02133(GTA08_BOTSDO02133);gene-GTA08_BOTSDO09127(GTA08_BOTSDO09127);gene-GTA08_BOTSDO11445(GTA08_BOTSDO11445)
GO:0032270	BP	positive regulation of cellular protein metabolic process	1	0	1	49	0.923325	1	gene-GTA08_BOTSDO00957(GTA08_BOTSDO00957)	-
GO:0045333	BP	cellular respiration	0	1	1	49	0.923325	1	-	gene-GTA08_BOTSDO07597(GTA08_BOTSDO07597)
GO:0009165	BP	nucleotide biosynthetic process	1	1	2	81	0.923492	1	gene-GTA08_BOTSDO11135(GTA08_BOTSDO11135)	gene-GTA08_BOTSDO00110(GTA08_BOTSDO00110)
GO:0006811	BP	ion transport	3	6	9	263	0.926204	1	gene-GTA08_BOTSDO00735(GTA08_BOTSDO00735);gene-GTA08_BOTSDO03968(GTA08_BOTSDO03968);gene-GTA08_BOTSDO04858(GTA08_BOTSDO04858)	gene-GTA08_BOTSDO00110(GTA08_BOTSDO00110);gene-GTA08_BOTSDO00662(GTA08_BOTSDO00662);gene-GTA08_BOTSDO05395(GTA08_BOTSDO05395);gene-GTA08_BOTSDO08019(GTA08_BOTSDO08019);gene-GTA08_BOTSDO09892(GTA08_BOTSDO09892);gene-GTA08_BOTSDO10310(GTA08_BOTSDO10310)
GO:0006913	BP	nucleocytoplasmic transport	0	2	2	82	0.926695	1	-	gene-GTA08_BOTSDO05301(GTA08_BOTSDO05301);gene-GTA08_BOTSDO05670(GTA08_BOTSDO05670)
GO:0051169	BP	nuclear transport	0	2	2	82	0.926695	1	-	gene-GTA08_BOTSDO05301(GTA08_BOTSDO05301);gene-GTA08_BOTSDO05670(GTA08_BOTSDO05670)
GO:0051247	BP	positive regulation of protein metabolic process	1	0	1	50	0.927257	1	gene-GTA08_BOTSDO00957(GTA08_BOTSDO00957)	-
GO:0055082	BP	cellular chemical homeostasis	1	0	1	50	0.927257	1	gene-GTA08_BOTSDO04463(GTA08_BOTSDO04463)	-
GO:0015849	BP	organic acid transport	2	0	2	83	0.929772	1	gene-GTA08_BOTSDO00735(GTA08_BOTSDO00735);gene-GTA08_BOTSDO04858(GTA08_BOTSDO04858)	-
GO:0046942	BP	carboxylic acid transport	2	0	2	83	0.929772	1	gene-GTA08_BOTSDO00735(GTA08_BOTSDO00735);gene-GTA08_BOTSDO04858(GTA08_BOTSDO04858)	-
GO:0006401	BP	RNA catabolic process	0	1	1	51	0.930987	1	-	gene-GTA08_BOTSDO11445(GTA08_BOTSDO11445)
GO:1901293	BP	nucleoside phosphate biosynthetic process	1	1	2	84	0.932728	1	gene-GTA08_BOTSDO11135(GTA08_BOTSDO11135)	gene-GTA08_BOTSDO00110(GTA08_BOTSDO00110)
GO:0009057	BP	macromolecule catabolic process	2	5	7	220	0.937289	1	gene-GTA08_BOTSDO00957(GTA08_BOTSDO00957);gene-GTA08_BOTSDO10386(GTA08_BOTSDO10386)	gene-GTA08_BOTSDO02033(GTA08_BOTSDO02033);gene-GTA08_BOTSDO02133(GTA08_BOTSDO02133);gene-GTA08_BOTSDO08820(GTA08_BOTSDO08820);gene-GTA08_BOTSDO09127(GTA08_BOTSDO09127);gene-GTA08_BOTSDO11445(GTA08_BOTSDO11445)
GO:0015980	BP	energy derivation by oxidation of organic compounds	0	1	1	53	0.937886	1	-	gene-GTA08_BOTSDO07597(GTA08_BOTSDO07597)
GO:0006091	BP	generation of precursor metabolites and energy	1	1	2	86	0.938289	1	gene-GTA08_BOTSDO04463(GTA08_BOTSDO04463)	gene-GTA08_BOTSDO07597(GTA08_BOTSDO07597)
GO:0090407	BP	organophosphate biosynthetic process	2	2	4	144	0.94054	1	gene-GTA08_BOTSDO01182(GTA08_BOTSDO01182);gene-GTA08_BOTSDO11135(GTA08_BOTSDO11135)	gene-GTA08_BOTSDO00110(GTA08_BOTSDO00110);gene-GTA08_BOTSDO01769(GTA08_BOTSDO01769)
GO:0006650	BP	glycerophospholipid metabolic process	0	1	1	54	0.941074	1	-	gene-GTA08_BOTSDO01769(GTA08_BOTSDO01769)
GO:0043161	BP	proteasome-mediated ubiquitin-dependent protein catabolic process	1	0	1	54	0.941074	1	gene-GTA08_BOTSDO00957(GTA08_BOTSDO00957)	-
GO:0090502	BP	RNA phosphodiester bond hydrolysis, endonucleolytic	0	1	1	54	0.941074	1	-	gene-GTA08_BOTSDO04125(GTA08_BOTSDO04125)
GO:0006810	BP	transport	20	33	53	1246	0.944806	1	gene-GTA08_BOTSDO00735(GTA08_BOTSDO00735);gene-GTA08_BOTSDO02626(GTA08_BOTSDO02626);gene-GTA08_BOTSDO02880(GTA08_BOTSDO02880);gene-GTA08_BOTSDO03375(GTA08_BOTSDO03375);gene-GTA08_BOTSDO03968(GTA08_BOTSDO03968);gene-GTA08_BOTSDO04416(GTA08_BOTSDO04416);gene-GTA08_BOTSDO04858(GTA08_BOTSDO04858);gene-GTA08_BOTSDO04859(GTA08_BOTSDO04859);gene-GTA08_BOTSDO04869(GTA08_BOTSDO04869);gene-GTA08_BOTSDO0526…	gene-GTA08_BOTSDO00110(GTA08_BOTSDO00110);gene-GTA08_BOTSDO00662(GTA08_BOTSDO00662);gene-GTA08_BOTSDO00886(GTA08_BOTSDO00886);gene-GTA08_BOTSDO01346(GTA08_BOTSDO01346);gene-GTA08_BOTSDO01505(GTA08_BOTSDO01505);gene-GTA08_BOTSDO01701(GTA08_BOTSDO01701);gene-GTA08_BOTSDO01844(GTA08_BOTSDO01844);gene-GTA08_BOTSDO01978(GTA08_BOTSDO01978);gene-GTA08_BOTSDO02321(GTA08_BOTSDO02321);gene-GTA08_BOTSDO0289…
GO:0048878	BP	chemical homeostasis	1	0	1	56	0.946967	1	gene-GTA08_BOTSDO04463(GTA08_BOTSDO04463)	-
GO:0010498	BP	proteasomal protein catabolic process	1	0	1	57	0.94969	1	gene-GTA08_BOTSDO00957(GTA08_BOTSDO00957)	-
GO:0046486	BP	glycerolipid metabolic process	0	1	1	58	0.952273	1	-	gene-GTA08_BOTSDO01769(GTA08_BOTSDO01769)
GO:0098656	BP	anion transmembrane transport	2	0	2	92	0.952476	1	gene-GTA08_BOTSDO00735(GTA08_BOTSDO00735);gene-GTA08_BOTSDO04858(GTA08_BOTSDO04858)	-
GO:0051234	BP	establishment of localization	20	33	53	1258	0.95378	1	gene-GTA08_BOTSDO00735(GTA08_BOTSDO00735);gene-GTA08_BOTSDO02626(GTA08_BOTSDO02626);gene-GTA08_BOTSDO02880(GTA08_BOTSDO02880);gene-GTA08_BOTSDO03375(GTA08_BOTSDO03375);gene-GTA08_BOTSDO03968(GTA08_BOTSDO03968);gene-GTA08_BOTSDO04416(GTA08_BOTSDO04416);gene-GTA08_BOTSDO04858(GTA08_BOTSDO04858);gene-GTA08_BOTSDO04859(GTA08_BOTSDO04859);gene-GTA08_BOTSDO04869(GTA08_BOTSDO04869);gene-GTA08_BOTSDO0526…	gene-GTA08_BOTSDO00110(GTA08_BOTSDO00110);gene-GTA08_BOTSDO00662(GTA08_BOTSDO00662);gene-GTA08_BOTSDO00886(GTA08_BOTSDO00886);gene-GTA08_BOTSDO01346(GTA08_BOTSDO01346);gene-GTA08_BOTSDO01505(GTA08_BOTSDO01505);gene-GTA08_BOTSDO01701(GTA08_BOTSDO01701);gene-GTA08_BOTSDO01844(GTA08_BOTSDO01844);gene-GTA08_BOTSDO01978(GTA08_BOTSDO01978);gene-GTA08_BOTSDO02321(GTA08_BOTSDO02321);gene-GTA08_BOTSDO0289…
GO:0090305	BP	nucleic acid phosphodiester bond hydrolysis	0	3	3	123	0.95413	1	-	gene-GTA08_BOTSDO02033(GTA08_BOTSDO02033);gene-GTA08_BOTSDO04125(GTA08_BOTSDO04125);gene-GTA08_BOTSDO10643(GTA08_BOTSDO10643)
GO:0045944	BP	positive regulation of transcription by RNA polymerase II	1	0	1	61	0.959256	1	gene-GTA08_BOTSDO00957(GTA08_BOTSDO00957)	-
GO:0008033	BP	tRNA processing	1	0	1	62	0.96135	1	gene-GTA08_BOTSDO01396(GTA08_BOTSDO01396)	-
GO:0055086	BP	nucleobase-containing small molecule metabolic process	2	2	4	159	0.965245	1	gene-GTA08_BOTSDO04463(GTA08_BOTSDO04463);gene-GTA08_BOTSDO11135(GTA08_BOTSDO11135)	gene-GTA08_BOTSDO00110(GTA08_BOTSDO00110);gene-GTA08_BOTSDO02221(GTA08_BOTSDO02221)
GO:0051603	BP	proteolysis involved in cellular protein catabolic process	1	1	2	100	0.966623	1	gene-GTA08_BOTSDO00957(GTA08_BOTSDO00957)	gene-GTA08_BOTSDO09127(GTA08_BOTSDO09127)
GO:0034220	BP	ion transmembrane transport	2	3	5	188	0.966732	1	gene-GTA08_BOTSDO00735(GTA08_BOTSDO00735);gene-GTA08_BOTSDO04858(GTA08_BOTSDO04858)	gene-GTA08_BOTSDO00110(GTA08_BOTSDO00110);gene-GTA08_BOTSDO00662(GTA08_BOTSDO00662);gene-GTA08_BOTSDO10310(GTA08_BOTSDO10310)
GO:0015711	BP	organic anion transport	2	0	2	101	0.968077	1	gene-GTA08_BOTSDO00735(GTA08_BOTSDO00735);gene-GTA08_BOTSDO04858(GTA08_BOTSDO04858)	-
GO:0044257	BP	cellular protein catabolic process	1	1	2	101	0.968077	1	gene-GTA08_BOTSDO00957(GTA08_BOTSDO00957)	gene-GTA08_BOTSDO09127(GTA08_BOTSDO09127)
GO:0003333	BP	amino acid transmembrane transport	1	0	1	66	0.968705	1	gene-GTA08_BOTSDO00735(GTA08_BOTSDO00735)	-
GO:0048583	BP	regulation of response to stimulus	1	0	1	66	0.968705	1	gene-GTA08_BOTSDO00957(GTA08_BOTSDO00957)	-
GO:0045893	BP	positive regulation of transcription, DNA-templated	1	0	1	68	0.971841	1	gene-GTA08_BOTSDO00957(GTA08_BOTSDO00957)	-
GO:1902680	BP	positive regulation of RNA biosynthetic process	1	0	1	68	0.971841	1	gene-GTA08_BOTSDO00957(GTA08_BOTSDO00957)	-
GO:1903508	BP	positive regulation of nucleic acid-templated transcription	1	0	1	68	0.971841	1	gene-GTA08_BOTSDO00957(GTA08_BOTSDO00957)	-
GO:0051254	BP	positive regulation of RNA metabolic process	1	0	1	69	0.97329	1	gene-GTA08_BOTSDO00957(GTA08_BOTSDO00957)	-
GO:0051188	BP	cofactor biosynthetic process	2	0	2	106	0.97448	1	gene-GTA08_BOTSDO01396(GTA08_BOTSDO01396);gene-GTA08_BOTSDO11135(GTA08_BOTSDO11135)	-
GO:0009108	BP	coenzyme biosynthetic process	1	0	1	71	0.975968	1	gene-GTA08_BOTSDO11135(GTA08_BOTSDO11135)	-
GO:0009451	BP	RNA modification	1	0	1	71	0.975968	1	gene-GTA08_BOTSDO01396(GTA08_BOTSDO01396)	-
GO:0030163	BP	protein catabolic process	1	1	2	108	0.976678	1	gene-GTA08_BOTSDO00957(GTA08_BOTSDO00957)	gene-GTA08_BOTSDO09127(GTA08_BOTSDO09127)
GO:0006865	BP	amino acid transport	1	0	1	73	0.978378	1	gene-GTA08_BOTSDO00735(GTA08_BOTSDO00735)	-
GO:0019725	BP	cellular homeostasis	1	0	1	73	0.978378	1	gene-GTA08_BOTSDO04463(GTA08_BOTSDO04463)	-
GO:0051186	BP	cofactor metabolic process	2	1	3	142	0.978538	1	gene-GTA08_BOTSDO01396(GTA08_BOTSDO01396);gene-GTA08_BOTSDO11135(GTA08_BOTSDO11135)	gene-GTA08_BOTSDO12189(GTA08_BOTSDO12189)
GO:0051640	BP	organelle localization	0	1	1	74	0.979491	1	-	gene-GTA08_BOTSDO09246(GTA08_BOTSDO09246)
GO:0045935	BP	positive regulation of nucleobase-containing compound metabolic process	1	0	1	75	0.980547	1	gene-GTA08_BOTSDO00957(GTA08_BOTSDO00957)	-
GO:1901135	BP	carbohydrate derivative metabolic process	2	3	5	206	0.982323	1	gene-GTA08_BOTSDO04463(GTA08_BOTSDO04463);gene-GTA08_BOTSDO11135(GTA08_BOTSDO11135)	gene-GTA08_BOTSDO00110(GTA08_BOTSDO00110);gene-GTA08_BOTSDO02221(GTA08_BOTSDO02221);gene-GTA08_BOTSDO13610(GTA08_BOTSDO13610)
GO:0051179	BP	localization	20	33	53	1325	0.984495	1	gene-GTA08_BOTSDO00735(GTA08_BOTSDO00735);gene-GTA08_BOTSDO02626(GTA08_BOTSDO02626);gene-GTA08_BOTSDO02880(GTA08_BOTSDO02880);gene-GTA08_BOTSDO03375(GTA08_BOTSDO03375);gene-GTA08_BOTSDO03968(GTA08_BOTSDO03968);gene-GTA08_BOTSDO04416(GTA08_BOTSDO04416);gene-GTA08_BOTSDO04858(GTA08_BOTSDO04858);gene-GTA08_BOTSDO04859(GTA08_BOTSDO04859);gene-GTA08_BOTSDO04869(GTA08_BOTSDO04869);gene-GTA08_BOTSDO0526…	gene-GTA08_BOTSDO00110(GTA08_BOTSDO00110);gene-GTA08_BOTSDO00662(GTA08_BOTSDO00662);gene-GTA08_BOTSDO00886(GTA08_BOTSDO00886);gene-GTA08_BOTSDO01346(GTA08_BOTSDO01346);gene-GTA08_BOTSDO01505(GTA08_BOTSDO01505);gene-GTA08_BOTSDO01701(GTA08_BOTSDO01701);gene-GTA08_BOTSDO01844(GTA08_BOTSDO01844);gene-GTA08_BOTSDO01978(GTA08_BOTSDO01978);gene-GTA08_BOTSDO02321(GTA08_BOTSDO02321);gene-GTA08_BOTSDO0289…
GO:0010557	BP	positive regulation of macromolecule biosynthetic process	1	0	1	81	0.985838	1	gene-GTA08_BOTSDO00957(GTA08_BOTSDO00957)	-
GO:0010628	BP	positive regulation of gene expression	1	0	1	81	0.985838	1	gene-GTA08_BOTSDO00957(GTA08_BOTSDO00957)	-
GO:0045892	BP	negative regulation of transcription, DNA-templated	1	0	1	82	0.986568	1	gene-GTA08_BOTSDO00957(GTA08_BOTSDO00957)	-
GO:0090501	BP	RNA phosphodiester bond hydrolysis	0	1	1	82	0.986568	1	-	gene-GTA08_BOTSDO04125(GTA08_BOTSDO04125)
GO:1902679	BP	negative regulation of RNA biosynthetic process	1	0	1	82	0.986568	1	gene-GTA08_BOTSDO00957(GTA08_BOTSDO00957)	-
GO:1903507	BP	negative regulation of nucleic acid-templated transcription	1	0	1	82	0.986568	1	gene-GTA08_BOTSDO00957(GTA08_BOTSDO00957)	-
GO:1901137	BP	carbohydrate derivative biosynthetic process	1	1	2	121	0.9871	1	gene-GTA08_BOTSDO11135(GTA08_BOTSDO11135)	gene-GTA08_BOTSDO00110(GTA08_BOTSDO00110)
GO:0016310	BP	phosphorylation	5	4	9	326	0.987812	1	gene-GTA08_BOTSDO02119(GTA08_BOTSDO02119);gene-GTA08_BOTSDO03374(GTA08_BOTSDO03374);gene-GTA08_BOTSDO04463(GTA08_BOTSDO04463);gene-GTA08_BOTSDO11135(GTA08_BOTSDO11135);gene-GTA08_BOTSDO12946(GTA08_BOTSDO12946)	gene-GTA08_BOTSDO04147(GTA08_BOTSDO04147);gene-GTA08_BOTSDO07933(GTA08_BOTSDO07933);gene-GTA08_BOTSDO09111(GTA08_BOTSDO09111);gene-GTA08_BOTSDO13610(GTA08_BOTSDO13610)
GO:0051253	BP	negative regulation of RNA metabolic process	1	0	1	84	0.987918	1	gene-GTA08_BOTSDO00957(GTA08_BOTSDO00957)	-
GO:0009891	BP	positive regulation of biosynthetic process	1	0	1	85	0.988541	1	gene-GTA08_BOTSDO00957(GTA08_BOTSDO00957)	-
GO:0031328	BP	positive regulation of cellular biosynthetic process	1	0	1	85	0.988541	1	gene-GTA08_BOTSDO00957(GTA08_BOTSDO00957)	-
GO:0010629	BP	negative regulation of gene expression	1	1	2	127	0.990219	1	gene-GTA08_BOTSDO00957(GTA08_BOTSDO00957)	gene-GTA08_BOTSDO11445(GTA08_BOTSDO11445)
GO:0006732	BP	coenzyme metabolic process	1	0	1	88	0.990225	1	gene-GTA08_BOTSDO11135(GTA08_BOTSDO11135)	-
GO:0045934	BP	negative regulation of nucleobase-containing compound metabolic process	1	0	1	89	0.990729	1	gene-GTA08_BOTSDO00957(GTA08_BOTSDO00957)	-
GO:0006397	BP	mRNA processing	0	1	1	93	0.992501	1	-	gene-GTA08_BOTSDO11445(GTA08_BOTSDO11445)
GO:0006511	BP	ubiquitin-dependent protein catabolic process	1	0	1	93	0.992501	1	gene-GTA08_BOTSDO00957(GTA08_BOTSDO00957)	-
GO:0010558	BP	negative regulation of macromolecule biosynthetic process	1	0	1	93	0.992501	1	gene-GTA08_BOTSDO00957(GTA08_BOTSDO00957)	-
GO:2000113	BP	negative regulation of cellular macromolecule biosynthetic process	1	0	1	93	0.992501	1	gene-GTA08_BOTSDO00957(GTA08_BOTSDO00957)	-
GO:0019941	BP	modification-dependent protein catabolic process	1	0	1	94	0.992889	1	gene-GTA08_BOTSDO00957(GTA08_BOTSDO00957)	-
GO:0032259	BP	methylation	2	2	4	202	0.993344	1	gene-GTA08_BOTSDO09616(GTA08_BOTSDO09616);gene-GTA08_BOTSDO13636(GTA08_BOTSDO13636)	gene-GTA08_BOTSDO01769(GTA08_BOTSDO01769);gene-GTA08_BOTSDO07674(GTA08_BOTSDO07674)
GO:0050896	BP	response to stimulus	12	6	18	576	0.993618	1	gene-GTA08_BOTSDO00957(GTA08_BOTSDO00957);gene-GTA08_BOTSDO01201(GTA08_BOTSDO01201);gene-GTA08_BOTSDO04384(GTA08_BOTSDO04384);gene-GTA08_BOTSDO05091(GTA08_BOTSDO05091);gene-GTA08_BOTSDO05830(GTA08_BOTSDO05830);gene-GTA08_BOTSDO06402(GTA08_BOTSDO06402);gene-GTA08_BOTSDO08362(GTA08_BOTSDO08362);gene-GTA08_BOTSDO08703(GTA08_BOTSDO08703);gene-GTA08_BOTSDO09581(GTA08_BOTSDO09581);gene-GTA08_BOTSDO1058…	gene-GTA08_BOTSDO01875(GTA08_BOTSDO01875);gene-GTA08_BOTSDO01877(GTA08_BOTSDO01877);gene-GTA08_BOTSDO02767(GTA08_BOTSDO02767);gene-GTA08_BOTSDO04606(GTA08_BOTSDO04606);gene-GTA08_BOTSDO05341(GTA08_BOTSDO05341);gene-GTA08_BOTSDO12189(GTA08_BOTSDO12189)
GO:0009890	BP	negative regulation of biosynthetic process	1	0	1	99	0.994546	1	gene-GTA08_BOTSDO00957(GTA08_BOTSDO00957)	-
GO:0031327	BP	negative regulation of cellular biosynthetic process	1	0	1	99	0.994546	1	gene-GTA08_BOTSDO00957(GTA08_BOTSDO00957)	-
GO:0043632	BP	modification-dependent macromolecule catabolic process	1	0	1	101	0.995096	1	gene-GTA08_BOTSDO00957(GTA08_BOTSDO00957)	-
GO:0042592	BP	homeostatic process	1	0	1	103	0.99559	1	gene-GTA08_BOTSDO04463(GTA08_BOTSDO04463)	-
GO:0010605	BP	negative regulation of macromolecule metabolic process	1	1	2	149	0.996514	1	gene-GTA08_BOTSDO00957(GTA08_BOTSDO00957)	gene-GTA08_BOTSDO11445(GTA08_BOTSDO11445)
GO:0051172	BP	negative regulation of nitrogen compound metabolic process	1	0	1	111	0.997118	1	gene-GTA08_BOTSDO00957(GTA08_BOTSDO00957)	-
GO:0009892	BP	negative regulation of metabolic process	1	1	2	157	0.997618	1	gene-GTA08_BOTSDO00957(GTA08_BOTSDO00957)	gene-GTA08_BOTSDO11445(GTA08_BOTSDO11445)
GO:0006399	BP	tRNA metabolic process	1	0	1	116	0.997791	1	gene-GTA08_BOTSDO01396(GTA08_BOTSDO01396)	-
GO:0010604	BP	positive regulation of macromolecule metabolic process	1	0	1	116	0.997791	1	gene-GTA08_BOTSDO00957(GTA08_BOTSDO00957)	-
GO:0051173	BP	positive regulation of nitrogen compound metabolic process	1	0	1	117	0.997906	1	gene-GTA08_BOTSDO00957(GTA08_BOTSDO00957)	-
GO:0031324	BP	negative regulation of cellular metabolic process	1	0	1	118	0.998015	1	gene-GTA08_BOTSDO00957(GTA08_BOTSDO00957)	-
GO:0006281	BP	DNA repair	1	1	2	161	0.998033	1	gene-GTA08_BOTSDO00957(GTA08_BOTSDO00957)	gene-GTA08_BOTSDO05341(GTA08_BOTSDO05341)
GO:0034470	BP	ncRNA processing	1	1	2	168	0.998595	1	gene-GTA08_BOTSDO01396(GTA08_BOTSDO01396)	gene-GTA08_BOTSDO11445(GTA08_BOTSDO11445)
GO:0032268	BP	regulation of cellular protein metabolic process	1	0	1	125	0.998633	1	gene-GTA08_BOTSDO00957(GTA08_BOTSDO00957)	-
GO:0031325	BP	positive regulation of cellular metabolic process	1	0	1	126	0.998704	1	gene-GTA08_BOTSDO00957(GTA08_BOTSDO00957)	-
GO:0009893	BP	positive regulation of metabolic process	1	0	1	127	0.998771	1	gene-GTA08_BOTSDO00957(GTA08_BOTSDO00957)	-
GO:0016071	BP	mRNA metabolic process	0	1	1	127	0.998771	1	-	gene-GTA08_BOTSDO11445(GTA08_BOTSDO11445)
GO:0051246	BP	regulation of protein metabolic process	1	0	1	130	0.998953	1	gene-GTA08_BOTSDO00957(GTA08_BOTSDO00957)	-
GO:0006796	BP	phosphate-containing compound metabolic process	7	7	14	552	0.999368	1	gene-GTA08_BOTSDO01182(GTA08_BOTSDO01182);gene-GTA08_BOTSDO02119(GTA08_BOTSDO02119);gene-GTA08_BOTSDO03374(GTA08_BOTSDO03374);gene-GTA08_BOTSDO04463(GTA08_BOTSDO04463);gene-GTA08_BOTSDO11135(GTA08_BOTSDO11135);gene-GTA08_BOTSDO12946(GTA08_BOTSDO12946);gene-GTA08_BOTSDO14098(GTA08_BOTSDO14098)	gene-GTA08_BOTSDO00110(GTA08_BOTSDO00110);gene-GTA08_BOTSDO01769(GTA08_BOTSDO01769);gene-GTA08_BOTSDO02221(GTA08_BOTSDO02221);gene-GTA08_BOTSDO04147(GTA08_BOTSDO04147);gene-GTA08_BOTSDO07933(GTA08_BOTSDO07933);gene-GTA08_BOTSDO09111(GTA08_BOTSDO09111);gene-GTA08_BOTSDO13610(GTA08_BOTSDO13610)
GO:0006974	BP	cellular response to DNA damage stimulus	1	1	2	186	0.999413	1	gene-GTA08_BOTSDO00957(GTA08_BOTSDO00957)	gene-GTA08_BOTSDO05341(GTA08_BOTSDO05341)
GO:0006793	BP	phosphorus metabolic process	7	7	14	559	0.999497	1	gene-GTA08_BOTSDO01182(GTA08_BOTSDO01182);gene-GTA08_BOTSDO02119(GTA08_BOTSDO02119);gene-GTA08_BOTSDO03374(GTA08_BOTSDO03374);gene-GTA08_BOTSDO04463(GTA08_BOTSDO04463);gene-GTA08_BOTSDO11135(GTA08_BOTSDO11135);gene-GTA08_BOTSDO12946(GTA08_BOTSDO12946);gene-GTA08_BOTSDO14098(GTA08_BOTSDO14098)	gene-GTA08_BOTSDO00110(GTA08_BOTSDO00110);gene-GTA08_BOTSDO01769(GTA08_BOTSDO01769);gene-GTA08_BOTSDO02221(GTA08_BOTSDO02221);gene-GTA08_BOTSDO04147(GTA08_BOTSDO04147);gene-GTA08_BOTSDO07933(GTA08_BOTSDO07933);gene-GTA08_BOTSDO09111(GTA08_BOTSDO09111);gene-GTA08_BOTSDO13610(GTA08_BOTSDO13610)
GO:0065008	BP	regulation of biological quality	2	0	2	190	0.999518	1	gene-GTA08_BOTSDO04463(GTA08_BOTSDO04463);gene-GTA08_BOTSDO06692(GTA08_BOTSDO06692)	-
GO:0006357	BP	regulation of transcription by RNA polymerase II	3	0	3	239	0.999697	1	gene-GTA08_BOTSDO00957(GTA08_BOTSDO00957);gene-GTA08_BOTSDO02974(GTA08_BOTSDO02974);gene-GTA08_BOTSDO09573(GTA08_BOTSDO09573)	-
GO:0071702	BP	organic substance transport	4	4	8	408	0.999744	1	gene-GTA08_BOTSDO00735(GTA08_BOTSDO00735);gene-GTA08_BOTSDO04858(GTA08_BOTSDO04858);gene-GTA08_BOTSDO05292(GTA08_BOTSDO05292);gene-GTA08_BOTSDO06390(GTA08_BOTSDO06390)	gene-GTA08_BOTSDO01505(GTA08_BOTSDO01505);gene-GTA08_BOTSDO05301(GTA08_BOTSDO05301);gene-GTA08_BOTSDO05468(GTA08_BOTSDO05468);gene-GTA08_BOTSDO13953(GTA08_BOTSDO13953)
GO:0016192	BP	vesicle-mediated transport	0	1	1	165	0.999839	1	-	gene-GTA08_BOTSDO09246(GTA08_BOTSDO09246)
GO:0006259	BP	DNA metabolic process	2	2	4	300	0.9999	1	gene-GTA08_BOTSDO00957(GTA08_BOTSDO00957);gene-GTA08_BOTSDO05356(GTA08_BOTSDO05356)	gene-GTA08_BOTSDO02033(GTA08_BOTSDO02033);gene-GTA08_BOTSDO05341(GTA08_BOTSDO05341)
GO:0034660	BP	ncRNA metabolic process	1	1	2	222	0.999901	1	gene-GTA08_BOTSDO01396(GTA08_BOTSDO01396)	gene-GTA08_BOTSDO11445(GTA08_BOTSDO11445)
GO:0048519	BP	negative regulation of biological process	1	1	2	224	0.99991	1	gene-GTA08_BOTSDO00957(GTA08_BOTSDO00957)	gene-GTA08_BOTSDO11445(GTA08_BOTSDO11445)
GO:0006366	BP	transcription by RNA polymerase II	3	0	3	269	0.999926	1	gene-GTA08_BOTSDO00957(GTA08_BOTSDO00957);gene-GTA08_BOTSDO02974(GTA08_BOTSDO02974);gene-GTA08_BOTSDO09573(GTA08_BOTSDO09573)	-
GO:0048523	BP	negative regulation of cellular process	1	0	1	182	0.999936	1	gene-GTA08_BOTSDO00957(GTA08_BOTSDO00957)	-
GO:0006396	BP	RNA processing	2	1	3	272	0.999936	1	gene-GTA08_BOTSDO01396(GTA08_BOTSDO01396);gene-GTA08_BOTSDO05153(GTA08_BOTSDO05153)	gene-GTA08_BOTSDO11445(GTA08_BOTSDO11445)
GO:1901564	BP	organonitrogen compound metabolic process	8	39	47	1450	0.999955	1	gene-GTA08_BOTSDO00957(GTA08_BOTSDO00957);gene-GTA08_BOTSDO02628(GTA08_BOTSDO02628);gene-GTA08_BOTSDO04463(GTA08_BOTSDO04463);gene-GTA08_BOTSDO06236(GTA08_BOTSDO06236);gene-GTA08_BOTSDO07349(GTA08_BOTSDO07349);gene-GTA08_BOTSDO08711(GTA08_BOTSDO08711);gene-GTA08_BOTSDO09315(GTA08_BOTSDO09315);gene-GTA08_BOTSDO11135(GTA08_BOTSDO11135)	gene-GTA08_BOTSDO00110(GTA08_BOTSDO00110);gene-GTA08_BOTSDO00156(GTA08_BOTSDO00156);gene-GTA08_BOTSDO00716(GTA08_BOTSDO00716);gene-GTA08_BOTSDO00884(GTA08_BOTSDO00884);gene-GTA08_BOTSDO01717(GTA08_BOTSDO01717);gene-GTA08_BOTSDO01758(GTA08_BOTSDO01758);gene-GTA08_BOTSDO01769(GTA08_BOTSDO01769);gene-GTA08_BOTSDO01872(GTA08_BOTSDO01872);gene-GTA08_BOTSDO01981(GTA08_BOTSDO01981);gene-GTA08_BOTSDO0233…
GO:0051716	BP	cellular response to stimulus	4	6	10	515	0.999958	1	gene-GTA08_BOTSDO00957(GTA08_BOTSDO00957);gene-GTA08_BOTSDO05830(GTA08_BOTSDO05830);gene-GTA08_BOTSDO09581(GTA08_BOTSDO09581);gene-GTA08_BOTSDO13964(GTA08_BOTSDO13964)	gene-GTA08_BOTSDO01875(GTA08_BOTSDO01875);gene-GTA08_BOTSDO01877(GTA08_BOTSDO01877);gene-GTA08_BOTSDO02767(GTA08_BOTSDO02767);gene-GTA08_BOTSDO04606(GTA08_BOTSDO04606);gene-GTA08_BOTSDO05341(GTA08_BOTSDO05341);gene-GTA08_BOTSDO12189(GTA08_BOTSDO12189)
GO:0048522	BP	positive regulation of cellular process	1	0	1	192	0.999962	1	gene-GTA08_BOTSDO00957(GTA08_BOTSDO00957)	-
GO:0007165	BP	signal transduction	0	1	1	194	0.999966	1	-	gene-GTA08_BOTSDO04606(GTA08_BOTSDO04606)
GO:0023052	BP	signaling	0	1	1	194	0.999966	1	-	gene-GTA08_BOTSDO04606(GTA08_BOTSDO04606)
GO:0048518	BP	positive regulation of biological process	1	0	1	195	0.999968	1	gene-GTA08_BOTSDO00957(GTA08_BOTSDO00957)	-
GO:0006355	BP	regulation of transcription, DNA-templated	5	1	6	396	0.999969	1	gene-GTA08_BOTSDO00957(GTA08_BOTSDO00957);gene-GTA08_BOTSDO02974(GTA08_BOTSDO02974);gene-GTA08_BOTSDO08363(GTA08_BOTSDO08363);gene-GTA08_BOTSDO09070(GTA08_BOTSDO09070);gene-GTA08_BOTSDO09573(GTA08_BOTSDO09573)	gene-GTA08_BOTSDO05341(GTA08_BOTSDO05341)
GO:1903506	BP	regulation of nucleic acid-templated transcription	5	1	6	399	0.999973	1	gene-GTA08_BOTSDO00957(GTA08_BOTSDO00957);gene-GTA08_BOTSDO02974(GTA08_BOTSDO02974);gene-GTA08_BOTSDO08363(GTA08_BOTSDO08363);gene-GTA08_BOTSDO09070(GTA08_BOTSDO09070);gene-GTA08_BOTSDO09573(GTA08_BOTSDO09573)	gene-GTA08_BOTSDO05341(GTA08_BOTSDO05341)
GO:2001141	BP	regulation of RNA biosynthetic process	5	1	6	399	0.999973	1	gene-GTA08_BOTSDO00957(GTA08_BOTSDO00957);gene-GTA08_BOTSDO02974(GTA08_BOTSDO02974);gene-GTA08_BOTSDO08363(GTA08_BOTSDO08363);gene-GTA08_BOTSDO09070(GTA08_BOTSDO09070);gene-GTA08_BOTSDO09573(GTA08_BOTSDO09573)	gene-GTA08_BOTSDO05341(GTA08_BOTSDO05341)
GO:0051252	BP	regulation of RNA metabolic process	5	1	6	403	0.999977	1	gene-GTA08_BOTSDO00957(GTA08_BOTSDO00957);gene-GTA08_BOTSDO02974(GTA08_BOTSDO02974);gene-GTA08_BOTSDO08363(GTA08_BOTSDO08363);gene-GTA08_BOTSDO09070(GTA08_BOTSDO09070);gene-GTA08_BOTSDO09573(GTA08_BOTSDO09573)	gene-GTA08_BOTSDO05341(GTA08_BOTSDO05341)
GO:0019219	BP	regulation of nucleobase-containing compound metabolic process	5	1	6	414	0.999986	1	gene-GTA08_BOTSDO00957(GTA08_BOTSDO00957);gene-GTA08_BOTSDO02974(GTA08_BOTSDO02974);gene-GTA08_BOTSDO08363(GTA08_BOTSDO08363);gene-GTA08_BOTSDO09070(GTA08_BOTSDO09070);gene-GTA08_BOTSDO09573(GTA08_BOTSDO09573)	gene-GTA08_BOTSDO05341(GTA08_BOTSDO05341)
GO:0007154	BP	cell communication	0	1	1	210	0.999986	1	-	gene-GTA08_BOTSDO04606(GTA08_BOTSDO04606)
GO:0046907	BP	intracellular transport	0	2	2	267	0.99999	1	-	gene-GTA08_BOTSDO05301(GTA08_BOTSDO05301);gene-GTA08_BOTSDO05670(GTA08_BOTSDO05670)
GO:0033554	BP	cellular response to stress	1	1	2	280	0.999995	1	gene-GTA08_BOTSDO00957(GTA08_BOTSDO00957)	gene-GTA08_BOTSDO05341(GTA08_BOTSDO05341)
GO:0051649	BP	establishment of localization in cell	0	2	2	282	0.999995	1	-	gene-GTA08_BOTSDO05301(GTA08_BOTSDO05301);gene-GTA08_BOTSDO05670(GTA08_BOTSDO05670)
GO:0010468	BP	regulation of gene expression	5	2	7	482	0.999997	1	gene-GTA08_BOTSDO00957(GTA08_BOTSDO00957);gene-GTA08_BOTSDO02974(GTA08_BOTSDO02974);gene-GTA08_BOTSDO08363(GTA08_BOTSDO08363);gene-GTA08_BOTSDO09070(GTA08_BOTSDO09070);gene-GTA08_BOTSDO09573(GTA08_BOTSDO09573)	gene-GTA08_BOTSDO05341(GTA08_BOTSDO05341);gene-GTA08_BOTSDO11445(GTA08_BOTSDO11445)
GO:0006351	BP	transcription, DNA-templated	5	3	8	522	0.999998	1	gene-GTA08_BOTSDO00957(GTA08_BOTSDO00957);gene-GTA08_BOTSDO02974(GTA08_BOTSDO02974);gene-GTA08_BOTSDO08363(GTA08_BOTSDO08363);gene-GTA08_BOTSDO09070(GTA08_BOTSDO09070);gene-GTA08_BOTSDO09573(GTA08_BOTSDO09573)	gene-GTA08_BOTSDO01878(GTA08_BOTSDO01878);gene-GTA08_BOTSDO05341(GTA08_BOTSDO05341);gene-GTA08_BOTSDO08536(GTA08_BOTSDO08536)
GO:0097659	BP	nucleic acid-templated transcription	5	3	8	527	0.999998	1	gene-GTA08_BOTSDO00957(GTA08_BOTSDO00957);gene-GTA08_BOTSDO02974(GTA08_BOTSDO02974);gene-GTA08_BOTSDO08363(GTA08_BOTSDO08363);gene-GTA08_BOTSDO09070(GTA08_BOTSDO09070);gene-GTA08_BOTSDO09573(GTA08_BOTSDO09573)	gene-GTA08_BOTSDO01878(GTA08_BOTSDO01878);gene-GTA08_BOTSDO05341(GTA08_BOTSDO05341);gene-GTA08_BOTSDO08536(GTA08_BOTSDO08536)
GO:2000112	BP	regulation of cellular macromolecule biosynthetic process	5	1	6	459	0.999998	1	gene-GTA08_BOTSDO00957(GTA08_BOTSDO00957);gene-GTA08_BOTSDO02974(GTA08_BOTSDO02974);gene-GTA08_BOTSDO08363(GTA08_BOTSDO08363);gene-GTA08_BOTSDO09070(GTA08_BOTSDO09070);gene-GTA08_BOTSDO09573(GTA08_BOTSDO09573)	gene-GTA08_BOTSDO05341(GTA08_BOTSDO05341)
GO:0010556	BP	regulation of macromolecule biosynthetic process	5	1	6	463	0.999998	1	gene-GTA08_BOTSDO00957(GTA08_BOTSDO00957);gene-GTA08_BOTSDO02974(GTA08_BOTSDO02974);gene-GTA08_BOTSDO08363(GTA08_BOTSDO08363);gene-GTA08_BOTSDO09070(GTA08_BOTSDO09070);gene-GTA08_BOTSDO09573(GTA08_BOTSDO09573)	gene-GTA08_BOTSDO05341(GTA08_BOTSDO05341)
GO:0032774	BP	RNA biosynthetic process	5	3	8	532	0.999998	1	gene-GTA08_BOTSDO00957(GTA08_BOTSDO00957);gene-GTA08_BOTSDO02974(GTA08_BOTSDO02974);gene-GTA08_BOTSDO08363(GTA08_BOTSDO08363);gene-GTA08_BOTSDO09070(GTA08_BOTSDO09070);gene-GTA08_BOTSDO09573(GTA08_BOTSDO09573)	gene-GTA08_BOTSDO01878(GTA08_BOTSDO01878);gene-GTA08_BOTSDO05341(GTA08_BOTSDO05341);gene-GTA08_BOTSDO08536(GTA08_BOTSDO08536)
GO:0009889	BP	regulation of biosynthetic process	5	1	6	474	0.999999	1	gene-GTA08_BOTSDO00957(GTA08_BOTSDO00957);gene-GTA08_BOTSDO02974(GTA08_BOTSDO02974);gene-GTA08_BOTSDO08363(GTA08_BOTSDO08363);gene-GTA08_BOTSDO09070(GTA08_BOTSDO09070);gene-GTA08_BOTSDO09573(GTA08_BOTSDO09573)	gene-GTA08_BOTSDO05341(GTA08_BOTSDO05341)
GO:0031326	BP	regulation of cellular biosynthetic process	5	1	6	474	0.999999	1	gene-GTA08_BOTSDO00957(GTA08_BOTSDO00957);gene-GTA08_BOTSDO02974(GTA08_BOTSDO02974);gene-GTA08_BOTSDO08363(GTA08_BOTSDO08363);gene-GTA08_BOTSDO09070(GTA08_BOTSDO09070);gene-GTA08_BOTSDO09573(GTA08_BOTSDO09573)	gene-GTA08_BOTSDO05341(GTA08_BOTSDO05341)
GO:0051641	BP	cellular localization	0	3	3	371	0.999999	1	-	gene-GTA08_BOTSDO05301(GTA08_BOTSDO05301);gene-GTA08_BOTSDO05670(GTA08_BOTSDO05670);gene-GTA08_BOTSDO09246(GTA08_BOTSDO09246)
GO:0044238	BP	primary metabolic process	30	72	102	2802	1	1	gene-GTA08_BOTSDO00957(GTA08_BOTSDO00957);gene-GTA08_BOTSDO01182(GTA08_BOTSDO01182);gene-GTA08_BOTSDO01186(GTA08_BOTSDO01186);gene-GTA08_BOTSDO01193(GTA08_BOTSDO01193);gene-GTA08_BOTSDO01396(GTA08_BOTSDO01396);gene-GTA08_BOTSDO02628(GTA08_BOTSDO02628);gene-GTA08_BOTSDO02974(GTA08_BOTSDO02974);gene-GTA08_BOTSDO03712(GTA08_BOTSDO03712);gene-GTA08_BOTSDO04463(GTA08_BOTSDO04463);gene-GTA08_BOTSDO0509…	gene-GTA08_BOTSDO00110(GTA08_BOTSDO00110);gene-GTA08_BOTSDO00156(GTA08_BOTSDO00156);gene-GTA08_BOTSDO00332(GTA08_BOTSDO00332);gene-GTA08_BOTSDO00716(GTA08_BOTSDO00716);gene-GTA08_BOTSDO00884(GTA08_BOTSDO00884);gene-GTA08_BOTSDO01758(GTA08_BOTSDO01758);gene-GTA08_BOTSDO01769(GTA08_BOTSDO01769);gene-GTA08_BOTSDO01872(GTA08_BOTSDO01872);gene-GTA08_BOTSDO01878(GTA08_BOTSDO01878);gene-GTA08_BOTSDO0189…
GO:0034654	BP	nucleobase-containing compound biosynthetic process	6	5	11	665	1	1	gene-GTA08_BOTSDO00957(GTA08_BOTSDO00957);gene-GTA08_BOTSDO02974(GTA08_BOTSDO02974);gene-GTA08_BOTSDO08363(GTA08_BOTSDO08363);gene-GTA08_BOTSDO09070(GTA08_BOTSDO09070);gene-GTA08_BOTSDO09573(GTA08_BOTSDO09573);gene-GTA08_BOTSDO11135(GTA08_BOTSDO11135)	gene-GTA08_BOTSDO00110(GTA08_BOTSDO00110);gene-GTA08_BOTSDO01878(GTA08_BOTSDO01878);gene-GTA08_BOTSDO02221(GTA08_BOTSDO02221);gene-GTA08_BOTSDO05341(GTA08_BOTSDO05341);gene-GTA08_BOTSDO08536(GTA08_BOTSDO08536)
GO:0019438	BP	aromatic compound biosynthetic process	6	7	13	731	1	1	gene-GTA08_BOTSDO00957(GTA08_BOTSDO00957);gene-GTA08_BOTSDO02974(GTA08_BOTSDO02974);gene-GTA08_BOTSDO08363(GTA08_BOTSDO08363);gene-GTA08_BOTSDO09070(GTA08_BOTSDO09070);gene-GTA08_BOTSDO09573(GTA08_BOTSDO09573);gene-GTA08_BOTSDO11135(GTA08_BOTSDO11135)	gene-GTA08_BOTSDO00110(GTA08_BOTSDO00110);gene-GTA08_BOTSDO00716(GTA08_BOTSDO00716);gene-GTA08_BOTSDO01878(GTA08_BOTSDO01878);gene-GTA08_BOTSDO02221(GTA08_BOTSDO02221);gene-GTA08_BOTSDO04126(GTA08_BOTSDO04126);gene-GTA08_BOTSDO05341(GTA08_BOTSDO05341);gene-GTA08_BOTSDO08536(GTA08_BOTSDO08536)
GO:0019538	BP	protein metabolic process	5	18	23	1027	1	1	gene-GTA08_BOTSDO00957(GTA08_BOTSDO00957);gene-GTA08_BOTSDO06236(GTA08_BOTSDO06236);gene-GTA08_BOTSDO07349(GTA08_BOTSDO07349);gene-GTA08_BOTSDO08711(GTA08_BOTSDO08711);gene-GTA08_BOTSDO09315(GTA08_BOTSDO09315)	gene-GTA08_BOTSDO00884(GTA08_BOTSDO00884);gene-GTA08_BOTSDO01758(GTA08_BOTSDO01758);gene-GTA08_BOTSDO01872(GTA08_BOTSDO01872);gene-GTA08_BOTSDO02339(GTA08_BOTSDO02339);gene-GTA08_BOTSDO03475(GTA08_BOTSDO03475);gene-GTA08_BOTSDO03981(GTA08_BOTSDO03981);gene-GTA08_BOTSDO03986(GTA08_BOTSDO03986);gene-GTA08_BOTSDO04544(GTA08_BOTSDO04544);gene-GTA08_BOTSDO05396(GTA08_BOTSDO05396);gene-GTA08_BOTSDO0730…
GO:0071704	BP	organic substance metabolic process	32	77	109	2979	1	1	gene-GTA08_BOTSDO00957(GTA08_BOTSDO00957);gene-GTA08_BOTSDO01182(GTA08_BOTSDO01182);gene-GTA08_BOTSDO01186(GTA08_BOTSDO01186);gene-GTA08_BOTSDO01193(GTA08_BOTSDO01193);gene-GTA08_BOTSDO01396(GTA08_BOTSDO01396);gene-GTA08_BOTSDO02628(GTA08_BOTSDO02628);gene-GTA08_BOTSDO02974(GTA08_BOTSDO02974);gene-GTA08_BOTSDO03374(GTA08_BOTSDO03374);gene-GTA08_BOTSDO03712(GTA08_BOTSDO03712);gene-GTA08_BOTSDO0446…	gene-GTA08_BOTSDO00110(GTA08_BOTSDO00110);gene-GTA08_BOTSDO00156(GTA08_BOTSDO00156);gene-GTA08_BOTSDO00332(GTA08_BOTSDO00332);gene-GTA08_BOTSDO00716(GTA08_BOTSDO00716);gene-GTA08_BOTSDO00884(GTA08_BOTSDO00884);gene-GTA08_BOTSDO01717(GTA08_BOTSDO01717);gene-GTA08_BOTSDO01758(GTA08_BOTSDO01758);gene-GTA08_BOTSDO01769(GTA08_BOTSDO01769);gene-GTA08_BOTSDO01872(GTA08_BOTSDO01872);gene-GTA08_BOTSDO0187…
GO:0051171	BP	regulation of nitrogen compound metabolic process	5	1	6	521	1	1	gene-GTA08_BOTSDO00957(GTA08_BOTSDO00957);gene-GTA08_BOTSDO02974(GTA08_BOTSDO02974);gene-GTA08_BOTSDO08363(GTA08_BOTSDO08363);gene-GTA08_BOTSDO09070(GTA08_BOTSDO09070);gene-GTA08_BOTSDO09573(GTA08_BOTSDO09573)	gene-GTA08_BOTSDO05341(GTA08_BOTSDO05341)
GO:0060255	BP	regulation of macromolecule metabolic process	5	2	7	559	1	1	gene-GTA08_BOTSDO00957(GTA08_BOTSDO00957);gene-GTA08_BOTSDO02974(GTA08_BOTSDO02974);gene-GTA08_BOTSDO08363(GTA08_BOTSDO08363);gene-GTA08_BOTSDO09070(GTA08_BOTSDO09070);gene-GTA08_BOTSDO09573(GTA08_BOTSDO09573)	gene-GTA08_BOTSDO05341(GTA08_BOTSDO05341);gene-GTA08_BOTSDO11445(GTA08_BOTSDO11445)
GO:0043604	BP	amide biosynthetic process	1	1	2	358	1	1	gene-GTA08_BOTSDO11135(GTA08_BOTSDO11135)	gene-GTA08_BOTSDO08537(GTA08_BOTSDO08537)
GO:0080090	BP	regulation of primary metabolic process	5	1	6	535	1	1	gene-GTA08_BOTSDO00957(GTA08_BOTSDO00957);gene-GTA08_BOTSDO02974(GTA08_BOTSDO02974);gene-GTA08_BOTSDO08363(GTA08_BOTSDO08363);gene-GTA08_BOTSDO09070(GTA08_BOTSDO09070);gene-GTA08_BOTSDO09573(GTA08_BOTSDO09573)	gene-GTA08_BOTSDO05341(GTA08_BOTSDO05341)
GO:1901362	BP	organic cyclic compound biosynthetic process	6	7	13	772	1	1	gene-GTA08_BOTSDO00957(GTA08_BOTSDO00957);gene-GTA08_BOTSDO02974(GTA08_BOTSDO02974);gene-GTA08_BOTSDO08363(GTA08_BOTSDO08363);gene-GTA08_BOTSDO09070(GTA08_BOTSDO09070);gene-GTA08_BOTSDO09573(GTA08_BOTSDO09573);gene-GTA08_BOTSDO11135(GTA08_BOTSDO11135)	gene-GTA08_BOTSDO00110(GTA08_BOTSDO00110);gene-GTA08_BOTSDO00716(GTA08_BOTSDO00716);gene-GTA08_BOTSDO01878(GTA08_BOTSDO01878);gene-GTA08_BOTSDO02221(GTA08_BOTSDO02221);gene-GTA08_BOTSDO04126(GTA08_BOTSDO04126);gene-GTA08_BOTSDO05341(GTA08_BOTSDO05341);gene-GTA08_BOTSDO08536(GTA08_BOTSDO08536)
GO:0018130	BP	heterocycle biosynthetic process	6	6	12	742	1	1	gene-GTA08_BOTSDO00957(GTA08_BOTSDO00957);gene-GTA08_BOTSDO02974(GTA08_BOTSDO02974);gene-GTA08_BOTSDO08363(GTA08_BOTSDO08363);gene-GTA08_BOTSDO09070(GTA08_BOTSDO09070);gene-GTA08_BOTSDO09573(GTA08_BOTSDO09573);gene-GTA08_BOTSDO11135(GTA08_BOTSDO11135)	gene-GTA08_BOTSDO00110(GTA08_BOTSDO00110);gene-GTA08_BOTSDO01878(GTA08_BOTSDO01878);gene-GTA08_BOTSDO02221(GTA08_BOTSDO02221);gene-GTA08_BOTSDO04126(GTA08_BOTSDO04126);gene-GTA08_BOTSDO05341(GTA08_BOTSDO05341);gene-GTA08_BOTSDO08536(GTA08_BOTSDO08536)
GO:0031323	BP	regulation of cellular metabolic process	5	1	6	545	1	1	gene-GTA08_BOTSDO00957(GTA08_BOTSDO00957);gene-GTA08_BOTSDO02974(GTA08_BOTSDO02974);gene-GTA08_BOTSDO08363(GTA08_BOTSDO08363);gene-GTA08_BOTSDO09070(GTA08_BOTSDO09070);gene-GTA08_BOTSDO09573(GTA08_BOTSDO09573)	gene-GTA08_BOTSDO05341(GTA08_BOTSDO05341)
GO:0019222	BP	regulation of metabolic process	5	2	7	582	1	1	gene-GTA08_BOTSDO00957(GTA08_BOTSDO00957);gene-GTA08_BOTSDO02974(GTA08_BOTSDO02974);gene-GTA08_BOTSDO08363(GTA08_BOTSDO08363);gene-GTA08_BOTSDO09070(GTA08_BOTSDO09070);gene-GTA08_BOTSDO09573(GTA08_BOTSDO09573)	gene-GTA08_BOTSDO05341(GTA08_BOTSDO05341);gene-GTA08_BOTSDO11445(GTA08_BOTSDO11445)
GO:0006412	BP	translation	0	1	1	322	1	1	-	gene-GTA08_BOTSDO08537(GTA08_BOTSDO08537)
GO:0022607	BP	cellular component assembly	1	0	1	322	1	1	gene-GTA08_BOTSDO01396(GTA08_BOTSDO01396)	-
GO:0071705	BP	nitrogen compound transport	1	0	1	325	1	1	gene-GTA08_BOTSDO00735(GTA08_BOTSDO00735)	-
GO:0043043	BP	peptide biosynthetic process	0	1	1	327	1	1	-	gene-GTA08_BOTSDO08537(GTA08_BOTSDO08537)
GO:0043603	BP	cellular amide metabolic process	1	1	2	398	1	1	gene-GTA08_BOTSDO11135(GTA08_BOTSDO11135)	gene-GTA08_BOTSDO08537(GTA08_BOTSDO08537)
GO:1901566	BP	organonitrogen compound biosynthetic process	1	7	8	643	1	1	gene-GTA08_BOTSDO11135(GTA08_BOTSDO11135)	gene-GTA08_BOTSDO00110(GTA08_BOTSDO00110);gene-GTA08_BOTSDO01769(GTA08_BOTSDO01769);gene-GTA08_BOTSDO02900(GTA08_BOTSDO02900);gene-GTA08_BOTSDO04126(GTA08_BOTSDO04126);gene-GTA08_BOTSDO08537(GTA08_BOTSDO08537);gene-GTA08_BOTSDO11714(GTA08_BOTSDO11714);gene-GTA08_BOTSDO11986(GTA08_BOTSDO11986)
GO:0006518	BP	peptide metabolic process	0	1	1	343	1	1	-	gene-GTA08_BOTSDO08537(GTA08_BOTSDO08537)
GO:0016070	BP	RNA metabolic process	8	5	13	881	1	1	gene-GTA08_BOTSDO00957(GTA08_BOTSDO00957);gene-GTA08_BOTSDO01396(GTA08_BOTSDO01396);gene-GTA08_BOTSDO02974(GTA08_BOTSDO02974);gene-GTA08_BOTSDO03712(GTA08_BOTSDO03712);gene-GTA08_BOTSDO05153(GTA08_BOTSDO05153);gene-GTA08_BOTSDO08363(GTA08_BOTSDO08363);gene-GTA08_BOTSDO09070(GTA08_BOTSDO09070);gene-GTA08_BOTSDO09573(GTA08_BOTSDO09573)	gene-GTA08_BOTSDO01878(GTA08_BOTSDO01878);gene-GTA08_BOTSDO04125(GTA08_BOTSDO04125);gene-GTA08_BOTSDO05341(GTA08_BOTSDO05341);gene-GTA08_BOTSDO08536(GTA08_BOTSDO08536);gene-GTA08_BOTSDO11445(GTA08_BOTSDO11445)
GO:0006725	BP	cellular aromatic compound metabolic process	11	18	29	1386	1	1	gene-GTA08_BOTSDO00957(GTA08_BOTSDO00957);gene-GTA08_BOTSDO01396(GTA08_BOTSDO01396);gene-GTA08_BOTSDO02974(GTA08_BOTSDO02974);gene-GTA08_BOTSDO03712(GTA08_BOTSDO03712);gene-GTA08_BOTSDO04463(GTA08_BOTSDO04463);gene-GTA08_BOTSDO05153(GTA08_BOTSDO05153);gene-GTA08_BOTSDO05356(GTA08_BOTSDO05356);gene-GTA08_BOTSDO08363(GTA08_BOTSDO08363);gene-GTA08_BOTSDO09070(GTA08_BOTSDO09070);gene-GTA08_BOTSDO0957…	gene-GTA08_BOTSDO00110(GTA08_BOTSDO00110);gene-GTA08_BOTSDO00716(GTA08_BOTSDO00716);gene-GTA08_BOTSDO01878(GTA08_BOTSDO01878);gene-GTA08_BOTSDO02033(GTA08_BOTSDO02033);gene-GTA08_BOTSDO02221(GTA08_BOTSDO02221);gene-GTA08_BOTSDO04125(GTA08_BOTSDO04125);gene-GTA08_BOTSDO04126(GTA08_BOTSDO04126);gene-GTA08_BOTSDO05341(GTA08_BOTSDO05341);gene-GTA08_BOTSDO05670(GTA08_BOTSDO05670);gene-GTA08_BOTSDO0576…
GO:1901360	BP	organic cyclic compound metabolic process	11	19	30	1422	1	1	gene-GTA08_BOTSDO00957(GTA08_BOTSDO00957);gene-GTA08_BOTSDO01396(GTA08_BOTSDO01396);gene-GTA08_BOTSDO02974(GTA08_BOTSDO02974);gene-GTA08_BOTSDO03712(GTA08_BOTSDO03712);gene-GTA08_BOTSDO04463(GTA08_BOTSDO04463);gene-GTA08_BOTSDO05153(GTA08_BOTSDO05153);gene-GTA08_BOTSDO05356(GTA08_BOTSDO05356);gene-GTA08_BOTSDO08363(GTA08_BOTSDO08363);gene-GTA08_BOTSDO09070(GTA08_BOTSDO09070);gene-GTA08_BOTSDO0957…	gene-GTA08_BOTSDO00110(GTA08_BOTSDO00110);gene-GTA08_BOTSDO00716(GTA08_BOTSDO00716);gene-GTA08_BOTSDO01878(GTA08_BOTSDO01878);gene-GTA08_BOTSDO02033(GTA08_BOTSDO02033);gene-GTA08_BOTSDO02221(GTA08_BOTSDO02221);gene-GTA08_BOTSDO04125(GTA08_BOTSDO04125);gene-GTA08_BOTSDO04126(GTA08_BOTSDO04126);gene-GTA08_BOTSDO05341(GTA08_BOTSDO05341);gene-GTA08_BOTSDO05670(GTA08_BOTSDO05670);gene-GTA08_BOTSDO0576…
GO:0006464	BP	cellular protein modification process	0	1	1	452	1	1	-	gene-GTA08_BOTSDO01872(GTA08_BOTSDO01872)
GO:0036211	BP	protein modification process	0	1	1	452	1	1	-	gene-GTA08_BOTSDO01872(GTA08_BOTSDO01872)
GO:0044085	BP	cellular component biogenesis	1	0	1	453	1	1	gene-GTA08_BOTSDO01396(GTA08_BOTSDO01396)	-
GO:0043412	BP	macromolecule modification	1	1	2	517	1	1	gene-GTA08_BOTSDO01396(GTA08_BOTSDO01396)	gene-GTA08_BOTSDO01872(GTA08_BOTSDO01872)
GO:0009058	BP	biosynthetic process	13	15	28	1423	1	1	gene-GTA08_BOTSDO00957(GTA08_BOTSDO00957);gene-GTA08_BOTSDO01182(GTA08_BOTSDO01182);gene-GTA08_BOTSDO01186(GTA08_BOTSDO01186);gene-GTA08_BOTSDO01193(GTA08_BOTSDO01193);gene-GTA08_BOTSDO01396(GTA08_BOTSDO01396);gene-GTA08_BOTSDO02628(GTA08_BOTSDO02628);gene-GTA08_BOTSDO02974(GTA08_BOTSDO02974);gene-GTA08_BOTSDO05095(GTA08_BOTSDO05095);gene-GTA08_BOTSDO06380(GTA08_BOTSDO06380);gene-GTA08_BOTSDO0836…	gene-GTA08_BOTSDO00110(GTA08_BOTSDO00110);gene-GTA08_BOTSDO00716(GTA08_BOTSDO00716);gene-GTA08_BOTSDO01769(GTA08_BOTSDO01769);gene-GTA08_BOTSDO01878(GTA08_BOTSDO01878);gene-GTA08_BOTSDO02221(GTA08_BOTSDO02221);gene-GTA08_BOTSDO02849(GTA08_BOTSDO02849);gene-GTA08_BOTSDO02900(GTA08_BOTSDO02900);gene-GTA08_BOTSDO04126(GTA08_BOTSDO04126);gene-GTA08_BOTSDO05341(GTA08_BOTSDO05341);gene-GTA08_BOTSDO0853…
GO:1901576	BP	organic substance biosynthetic process	10	15	25	1368	1	1	gene-GTA08_BOTSDO00957(GTA08_BOTSDO00957);gene-GTA08_BOTSDO01182(GTA08_BOTSDO01182);gene-GTA08_BOTSDO01186(GTA08_BOTSDO01186);gene-GTA08_BOTSDO01193(GTA08_BOTSDO01193);gene-GTA08_BOTSDO02974(GTA08_BOTSDO02974);gene-GTA08_BOTSDO05095(GTA08_BOTSDO05095);gene-GTA08_BOTSDO08363(GTA08_BOTSDO08363);gene-GTA08_BOTSDO09070(GTA08_BOTSDO09070);gene-GTA08_BOTSDO09573(GTA08_BOTSDO09573);gene-GTA08_BOTSDO1113…	gene-GTA08_BOTSDO00110(GTA08_BOTSDO00110);gene-GTA08_BOTSDO00716(GTA08_BOTSDO00716);gene-GTA08_BOTSDO01769(GTA08_BOTSDO01769);gene-GTA08_BOTSDO01878(GTA08_BOTSDO01878);gene-GTA08_BOTSDO02221(GTA08_BOTSDO02221);gene-GTA08_BOTSDO02849(GTA08_BOTSDO02849);gene-GTA08_BOTSDO02900(GTA08_BOTSDO02900);gene-GTA08_BOTSDO04126(GTA08_BOTSDO04126);gene-GTA08_BOTSDO05341(GTA08_BOTSDO05341);gene-GTA08_BOTSDO0853…
GO:0090304	BP	nucleic acid metabolic process	9	7	16	1120	1	1	gene-GTA08_BOTSDO00957(GTA08_BOTSDO00957);gene-GTA08_BOTSDO01396(GTA08_BOTSDO01396);gene-GTA08_BOTSDO02974(GTA08_BOTSDO02974);gene-GTA08_BOTSDO03712(GTA08_BOTSDO03712);gene-GTA08_BOTSDO05153(GTA08_BOTSDO05153);gene-GTA08_BOTSDO05356(GTA08_BOTSDO05356);gene-GTA08_BOTSDO08363(GTA08_BOTSDO08363);gene-GTA08_BOTSDO09070(GTA08_BOTSDO09070);gene-GTA08_BOTSDO09573(GTA08_BOTSDO09573)	gene-GTA08_BOTSDO01878(GTA08_BOTSDO01878);gene-GTA08_BOTSDO02033(GTA08_BOTSDO02033);gene-GTA08_BOTSDO04125(GTA08_BOTSDO04125);gene-GTA08_BOTSDO05341(GTA08_BOTSDO05341);gene-GTA08_BOTSDO08536(GTA08_BOTSDO08536);gene-GTA08_BOTSDO10643(GTA08_BOTSDO10643);gene-GTA08_BOTSDO11445(GTA08_BOTSDO11445)
GO:0050794	BP	regulation of cellular process	5	2	7	815	1	1	gene-GTA08_BOTSDO00957(GTA08_BOTSDO00957);gene-GTA08_BOTSDO02974(GTA08_BOTSDO02974);gene-GTA08_BOTSDO08363(GTA08_BOTSDO08363);gene-GTA08_BOTSDO09070(GTA08_BOTSDO09070);gene-GTA08_BOTSDO09573(GTA08_BOTSDO09573)	gene-GTA08_BOTSDO04606(GTA08_BOTSDO04606);gene-GTA08_BOTSDO05341(GTA08_BOTSDO05341)
GO:0050789	BP	regulation of biological process	5	3	8	859	1	1	gene-GTA08_BOTSDO00957(GTA08_BOTSDO00957);gene-GTA08_BOTSDO02974(GTA08_BOTSDO02974);gene-GTA08_BOTSDO08363(GTA08_BOTSDO08363);gene-GTA08_BOTSDO09070(GTA08_BOTSDO09070);gene-GTA08_BOTSDO09573(GTA08_BOTSDO09573)	gene-GTA08_BOTSDO04606(GTA08_BOTSDO04606);gene-GTA08_BOTSDO05341(GTA08_BOTSDO05341);gene-GTA08_BOTSDO11445(GTA08_BOTSDO11445)
GO:0044249	BP	cellular biosynthetic process	11	12	23	1349	1	1	gene-GTA08_BOTSDO00957(GTA08_BOTSDO00957);gene-GTA08_BOTSDO01182(GTA08_BOTSDO01182);gene-GTA08_BOTSDO01186(GTA08_BOTSDO01186);gene-GTA08_BOTSDO01193(GTA08_BOTSDO01193);gene-GTA08_BOTSDO01396(GTA08_BOTSDO01396);gene-GTA08_BOTSDO02974(GTA08_BOTSDO02974);gene-GTA08_BOTSDO05095(GTA08_BOTSDO05095);gene-GTA08_BOTSDO08363(GTA08_BOTSDO08363);gene-GTA08_BOTSDO09070(GTA08_BOTSDO09070);gene-GTA08_BOTSDO0957…	gene-GTA08_BOTSDO00110(GTA08_BOTSDO00110);gene-GTA08_BOTSDO00716(GTA08_BOTSDO00716);gene-GTA08_BOTSDO01769(GTA08_BOTSDO01769);gene-GTA08_BOTSDO01878(GTA08_BOTSDO01878);gene-GTA08_BOTSDO02221(GTA08_BOTSDO02221);gene-GTA08_BOTSDO02900(GTA08_BOTSDO02900);gene-GTA08_BOTSDO04126(GTA08_BOTSDO04126);gene-GTA08_BOTSDO05341(GTA08_BOTSDO05341);gene-GTA08_BOTSDO08536(GTA08_BOTSDO08536);gene-GTA08_BOTSDO0853…
GO:0006807	BP	nitrogen compound metabolic process	17	47	64	2392	1	1	gene-GTA08_BOTSDO00957(GTA08_BOTSDO00957);gene-GTA08_BOTSDO01396(GTA08_BOTSDO01396);gene-GTA08_BOTSDO02628(GTA08_BOTSDO02628);gene-GTA08_BOTSDO02974(GTA08_BOTSDO02974);gene-GTA08_BOTSDO03712(GTA08_BOTSDO03712);gene-GTA08_BOTSDO04463(GTA08_BOTSDO04463);gene-GTA08_BOTSDO05153(GTA08_BOTSDO05153);gene-GTA08_BOTSDO05356(GTA08_BOTSDO05356);gene-GTA08_BOTSDO06236(GTA08_BOTSDO06236);gene-GTA08_BOTSDO0734…	gene-GTA08_BOTSDO00110(GTA08_BOTSDO00110);gene-GTA08_BOTSDO00156(GTA08_BOTSDO00156);gene-GTA08_BOTSDO00716(GTA08_BOTSDO00716);gene-GTA08_BOTSDO00884(GTA08_BOTSDO00884);gene-GTA08_BOTSDO01717(GTA08_BOTSDO01717);gene-GTA08_BOTSDO01758(GTA08_BOTSDO01758);gene-GTA08_BOTSDO01769(GTA08_BOTSDO01769);gene-GTA08_BOTSDO01872(GTA08_BOTSDO01872);gene-GTA08_BOTSDO01878(GTA08_BOTSDO01878);gene-GTA08_BOTSDO0198…
GO:0006139	BP	nucleobase-containing compound metabolic process	11	9	20	1272	1	1	gene-GTA08_BOTSDO00957(GTA08_BOTSDO00957);gene-GTA08_BOTSDO01396(GTA08_BOTSDO01396);gene-GTA08_BOTSDO02974(GTA08_BOTSDO02974);gene-GTA08_BOTSDO03712(GTA08_BOTSDO03712);gene-GTA08_BOTSDO04463(GTA08_BOTSDO04463);gene-GTA08_BOTSDO05153(GTA08_BOTSDO05153);gene-GTA08_BOTSDO05356(GTA08_BOTSDO05356);gene-GTA08_BOTSDO08363(GTA08_BOTSDO08363);gene-GTA08_BOTSDO09070(GTA08_BOTSDO09070);gene-GTA08_BOTSDO0957…	gene-GTA08_BOTSDO00110(GTA08_BOTSDO00110);gene-GTA08_BOTSDO01878(GTA08_BOTSDO01878);gene-GTA08_BOTSDO02033(GTA08_BOTSDO02033);gene-GTA08_BOTSDO02221(GTA08_BOTSDO02221);gene-GTA08_BOTSDO04125(GTA08_BOTSDO04125);gene-GTA08_BOTSDO05341(GTA08_BOTSDO05341);gene-GTA08_BOTSDO08536(GTA08_BOTSDO08536);gene-GTA08_BOTSDO10643(GTA08_BOTSDO10643);gene-GTA08_BOTSDO11445(GTA08_BOTSDO11445)
GO:0046483	BP	heterocycle metabolic process	11	12	23	1364	1	1	gene-GTA08_BOTSDO00957(GTA08_BOTSDO00957);gene-GTA08_BOTSDO01396(GTA08_BOTSDO01396);gene-GTA08_BOTSDO02974(GTA08_BOTSDO02974);gene-GTA08_BOTSDO03712(GTA08_BOTSDO03712);gene-GTA08_BOTSDO04463(GTA08_BOTSDO04463);gene-GTA08_BOTSDO05153(GTA08_BOTSDO05153);gene-GTA08_BOTSDO05356(GTA08_BOTSDO05356);gene-GTA08_BOTSDO08363(GTA08_BOTSDO08363);gene-GTA08_BOTSDO09070(GTA08_BOTSDO09070);gene-GTA08_BOTSDO0957…	gene-GTA08_BOTSDO00110(GTA08_BOTSDO00110);gene-GTA08_BOTSDO01878(GTA08_BOTSDO01878);gene-GTA08_BOTSDO02033(GTA08_BOTSDO02033);gene-GTA08_BOTSDO02221(GTA08_BOTSDO02221);gene-GTA08_BOTSDO04125(GTA08_BOTSDO04125);gene-GTA08_BOTSDO04126(GTA08_BOTSDO04126);gene-GTA08_BOTSDO05341(GTA08_BOTSDO05341);gene-GTA08_BOTSDO05670(GTA08_BOTSDO05670);gene-GTA08_BOTSDO08536(GTA08_BOTSDO08536);gene-GTA08_BOTSDO1064…
GO:0044271	BP	cellular nitrogen compound biosynthetic process	6	6	12	1034	1	1	gene-GTA08_BOTSDO00957(GTA08_BOTSDO00957);gene-GTA08_BOTSDO02974(GTA08_BOTSDO02974);gene-GTA08_BOTSDO08363(GTA08_BOTSDO08363);gene-GTA08_BOTSDO09070(GTA08_BOTSDO09070);gene-GTA08_BOTSDO09573(GTA08_BOTSDO09573);gene-GTA08_BOTSDO11135(GTA08_BOTSDO11135)	gene-GTA08_BOTSDO00110(GTA08_BOTSDO00110);gene-GTA08_BOTSDO01878(GTA08_BOTSDO01878);gene-GTA08_BOTSDO02221(GTA08_BOTSDO02221);gene-GTA08_BOTSDO05341(GTA08_BOTSDO05341);gene-GTA08_BOTSDO08536(GTA08_BOTSDO08536);gene-GTA08_BOTSDO08537(GTA08_BOTSDO08537)
GO:0009059	BP	macromolecule biosynthetic process	5	5	10	982	1	1	gene-GTA08_BOTSDO00957(GTA08_BOTSDO00957);gene-GTA08_BOTSDO02974(GTA08_BOTSDO02974);gene-GTA08_BOTSDO08363(GTA08_BOTSDO08363);gene-GTA08_BOTSDO09070(GTA08_BOTSDO09070);gene-GTA08_BOTSDO09573(GTA08_BOTSDO09573)	gene-GTA08_BOTSDO01878(GTA08_BOTSDO01878);gene-GTA08_BOTSDO02849(GTA08_BOTSDO02849);gene-GTA08_BOTSDO05341(GTA08_BOTSDO05341);gene-GTA08_BOTSDO08536(GTA08_BOTSDO08536);gene-GTA08_BOTSDO08537(GTA08_BOTSDO08537)
GO:0065007	BP	biological regulation	7	3	10	994	1	1	gene-GTA08_BOTSDO00957(GTA08_BOTSDO00957);gene-GTA08_BOTSDO02974(GTA08_BOTSDO02974);gene-GTA08_BOTSDO04463(GTA08_BOTSDO04463);gene-GTA08_BOTSDO06692(GTA08_BOTSDO06692);gene-GTA08_BOTSDO08363(GTA08_BOTSDO08363);gene-GTA08_BOTSDO09070(GTA08_BOTSDO09070);gene-GTA08_BOTSDO09573(GTA08_BOTSDO09573)	gene-GTA08_BOTSDO04606(GTA08_BOTSDO04606);gene-GTA08_BOTSDO05341(GTA08_BOTSDO05341);gene-GTA08_BOTSDO11445(GTA08_BOTSDO11445)
GO:0016043	BP	cellular component organization	3	0	3	707	1	1	gene-GTA08_BOTSDO01396(GTA08_BOTSDO01396);gene-GTA08_BOTSDO06692(GTA08_BOTSDO06692);gene-GTA08_BOTSDO11906(GTA08_BOTSDO11906)	-
GO:0034645	BP	cellular macromolecule biosynthetic process	5	4	9	965	1	1	gene-GTA08_BOTSDO00957(GTA08_BOTSDO00957);gene-GTA08_BOTSDO02974(GTA08_BOTSDO02974);gene-GTA08_BOTSDO08363(GTA08_BOTSDO08363);gene-GTA08_BOTSDO09070(GTA08_BOTSDO09070);gene-GTA08_BOTSDO09573(GTA08_BOTSDO09573)	gene-GTA08_BOTSDO01878(GTA08_BOTSDO01878);gene-GTA08_BOTSDO05341(GTA08_BOTSDO05341);gene-GTA08_BOTSDO08536(GTA08_BOTSDO08536);gene-GTA08_BOTSDO08537(GTA08_BOTSDO08537)
GO:0010467	BP	gene expression	7	5	12	1112	1	1	gene-GTA08_BOTSDO00957(GTA08_BOTSDO00957);gene-GTA08_BOTSDO01396(GTA08_BOTSDO01396);gene-GTA08_BOTSDO02974(GTA08_BOTSDO02974);gene-GTA08_BOTSDO05153(GTA08_BOTSDO05153);gene-GTA08_BOTSDO08363(GTA08_BOTSDO08363);gene-GTA08_BOTSDO09070(GTA08_BOTSDO09070);gene-GTA08_BOTSDO09573(GTA08_BOTSDO09573)	gene-GTA08_BOTSDO01878(GTA08_BOTSDO01878);gene-GTA08_BOTSDO05341(GTA08_BOTSDO05341);gene-GTA08_BOTSDO08536(GTA08_BOTSDO08536);gene-GTA08_BOTSDO08537(GTA08_BOTSDO08537);gene-GTA08_BOTSDO11445(GTA08_BOTSDO11445)
GO:0008150	BP	biological_process	102	201	303	5958	1	1	gene-GTA08_BOTSDO00398(GTA08_BOTSDO00398);gene-GTA08_BOTSDO00735(GTA08_BOTSDO00735);gene-GTA08_BOTSDO00957(GTA08_BOTSDO00957);gene-GTA08_BOTSDO01182(GTA08_BOTSDO01182);gene-GTA08_BOTSDO01186(GTA08_BOTSDO01186);gene-GTA08_BOTSDO01192(GTA08_BOTSDO01192);gene-GTA08_BOTSDO01193(GTA08_BOTSDO01193);gene-GTA08_BOTSDO01194(GTA08_BOTSDO01194);gene-GTA08_BOTSDO01201(GTA08_BOTSDO01201);gene-GTA08_BOTSDO0139…	gene-GTA08_BOTSDO00012(GTA08_BOTSDO00012);gene-GTA08_BOTSDO00110(GTA08_BOTSDO00110);gene-GTA08_BOTSDO00156(GTA08_BOTSDO00156);gene-GTA08_BOTSDO00332(GTA08_BOTSDO00332);gene-GTA08_BOTSDO00341(GTA08_BOTSDO00341);gene-GTA08_BOTSDO00371(GTA08_BOTSDO00371);gene-GTA08_BOTSDO00382(GTA08_BOTSDO00382);gene-GTA08_BOTSDO00477(GTA08_BOTSDO00477);gene-GTA08_BOTSDO00551(GTA08_BOTSDO00551);gene-GTA08_BOTSDO0066…
GO:0009987	BP	cellular process	44	72	116	4003	1	1	gene-GTA08_BOTSDO00735(GTA08_BOTSDO00735);gene-GTA08_BOTSDO00957(GTA08_BOTSDO00957);gene-GTA08_BOTSDO01182(GTA08_BOTSDO01182);gene-GTA08_BOTSDO01186(GTA08_BOTSDO01186);gene-GTA08_BOTSDO01193(GTA08_BOTSDO01193);gene-GTA08_BOTSDO01396(GTA08_BOTSDO01396);gene-GTA08_BOTSDO02119(GTA08_BOTSDO02119);gene-GTA08_BOTSDO02626(GTA08_BOTSDO02626);gene-GTA08_BOTSDO02628(GTA08_BOTSDO02628);gene-GTA08_BOTSDO0288…	gene-GTA08_BOTSDO00110(GTA08_BOTSDO00110);gene-GTA08_BOTSDO00156(GTA08_BOTSDO00156);gene-GTA08_BOTSDO00662(GTA08_BOTSDO00662);gene-GTA08_BOTSDO00716(GTA08_BOTSDO00716);gene-GTA08_BOTSDO00886(GTA08_BOTSDO00886);gene-GTA08_BOTSDO01346(GTA08_BOTSDO01346);gene-GTA08_BOTSDO01505(GTA08_BOTSDO01505);gene-GTA08_BOTSDO01701(GTA08_BOTSDO01701);gene-GTA08_BOTSDO01769(GTA08_BOTSDO01769);gene-GTA08_BOTSDO0184…
GO:0034641	BP	cellular nitrogen compound metabolic process	11	12	23	1624	1	1	gene-GTA08_BOTSDO00957(GTA08_BOTSDO00957);gene-GTA08_BOTSDO01396(GTA08_BOTSDO01396);gene-GTA08_BOTSDO02974(GTA08_BOTSDO02974);gene-GTA08_BOTSDO03712(GTA08_BOTSDO03712);gene-GTA08_BOTSDO04463(GTA08_BOTSDO04463);gene-GTA08_BOTSDO05153(GTA08_BOTSDO05153);gene-GTA08_BOTSDO05356(GTA08_BOTSDO05356);gene-GTA08_BOTSDO08363(GTA08_BOTSDO08363);gene-GTA08_BOTSDO09070(GTA08_BOTSDO09070);gene-GTA08_BOTSDO0957…	gene-GTA08_BOTSDO00110(GTA08_BOTSDO00110);gene-GTA08_BOTSDO01878(GTA08_BOTSDO01878);gene-GTA08_BOTSDO02033(GTA08_BOTSDO02033);gene-GTA08_BOTSDO02221(GTA08_BOTSDO02221);gene-GTA08_BOTSDO04125(GTA08_BOTSDO04125);gene-GTA08_BOTSDO04126(GTA08_BOTSDO04126);gene-GTA08_BOTSDO05341(GTA08_BOTSDO05341);gene-GTA08_BOTSDO05670(GTA08_BOTSDO05670);gene-GTA08_BOTSDO08536(GTA08_BOTSDO08536);gene-GTA08_BOTSDO0853…
GO:0043170	BP	macromolecule metabolic process	14	28	42	2042	1	1	gene-GTA08_BOTSDO00957(GTA08_BOTSDO00957);gene-GTA08_BOTSDO01396(GTA08_BOTSDO01396);gene-GTA08_BOTSDO02974(GTA08_BOTSDO02974);gene-GTA08_BOTSDO03712(GTA08_BOTSDO03712);gene-GTA08_BOTSDO05153(GTA08_BOTSDO05153);gene-GTA08_BOTSDO05356(GTA08_BOTSDO05356);gene-GTA08_BOTSDO06236(GTA08_BOTSDO06236);gene-GTA08_BOTSDO07349(GTA08_BOTSDO07349);gene-GTA08_BOTSDO08363(GTA08_BOTSDO08363);gene-GTA08_BOTSDO0871…	gene-GTA08_BOTSDO00884(GTA08_BOTSDO00884);gene-GTA08_BOTSDO01758(GTA08_BOTSDO01758);gene-GTA08_BOTSDO01872(GTA08_BOTSDO01872);gene-GTA08_BOTSDO01878(GTA08_BOTSDO01878);gene-GTA08_BOTSDO02033(GTA08_BOTSDO02033);gene-GTA08_BOTSDO02133(GTA08_BOTSDO02133);gene-GTA08_BOTSDO02339(GTA08_BOTSDO02339);gene-GTA08_BOTSDO02849(GTA08_BOTSDO02849);gene-GTA08_BOTSDO03475(GTA08_BOTSDO03475);gene-GTA08_BOTSDO0398…
GO:0044237	BP	cellular metabolic process	21	38	59	2610	1	1	gene-GTA08_BOTSDO00957(GTA08_BOTSDO00957);gene-GTA08_BOTSDO01182(GTA08_BOTSDO01182);gene-GTA08_BOTSDO01186(GTA08_BOTSDO01186);gene-GTA08_BOTSDO01193(GTA08_BOTSDO01193);gene-GTA08_BOTSDO01396(GTA08_BOTSDO01396);gene-GTA08_BOTSDO02119(GTA08_BOTSDO02119);gene-GTA08_BOTSDO02628(GTA08_BOTSDO02628);gene-GTA08_BOTSDO02974(GTA08_BOTSDO02974);gene-GTA08_BOTSDO03374(GTA08_BOTSDO03374);gene-GTA08_BOTSDO0371…	gene-GTA08_BOTSDO00110(GTA08_BOTSDO00110);gene-GTA08_BOTSDO00156(GTA08_BOTSDO00156);gene-GTA08_BOTSDO00716(GTA08_BOTSDO00716);gene-GTA08_BOTSDO01769(GTA08_BOTSDO01769);gene-GTA08_BOTSDO01872(GTA08_BOTSDO01872);gene-GTA08_BOTSDO01878(GTA08_BOTSDO01878);gene-GTA08_BOTSDO01981(GTA08_BOTSDO01981);gene-GTA08_BOTSDO02033(GTA08_BOTSDO02033);gene-GTA08_BOTSDO02133(GTA08_BOTSDO02133);gene-GTA08_BOTSDO0222…
GO:0044260	BP	cellular macromolecule metabolic process	7	10	17	1587	1	1	gene-GTA08_BOTSDO00957(GTA08_BOTSDO00957);gene-GTA08_BOTSDO02974(GTA08_BOTSDO02974);gene-GTA08_BOTSDO05356(GTA08_BOTSDO05356);gene-GTA08_BOTSDO08363(GTA08_BOTSDO08363);gene-GTA08_BOTSDO09070(GTA08_BOTSDO09070);gene-GTA08_BOTSDO09573(GTA08_BOTSDO09573);gene-GTA08_BOTSDO10386(GTA08_BOTSDO10386)	gene-GTA08_BOTSDO01872(GTA08_BOTSDO01872);gene-GTA08_BOTSDO01878(GTA08_BOTSDO01878);gene-GTA08_BOTSDO02033(GTA08_BOTSDO02033);gene-GTA08_BOTSDO02133(GTA08_BOTSDO02133);gene-GTA08_BOTSDO05341(GTA08_BOTSDO05341);gene-GTA08_BOTSDO08536(GTA08_BOTSDO08536);gene-GTA08_BOTSDO08537(GTA08_BOTSDO08537);gene-GTA08_BOTSDO08820(GTA08_BOTSDO08820);gene-GTA08_BOTSDO09127(GTA08_BOTSDO09127);gene-GTA08_BOTSDO1144…
GO:0044267	BP	cellular protein metabolic process	1	3	4	840	1	1	gene-GTA08_BOTSDO00957(GTA08_BOTSDO00957)	gene-GTA08_BOTSDO01872(GTA08_BOTSDO01872);gene-GTA08_BOTSDO08537(GTA08_BOTSDO08537);gene-GTA08_BOTSDO09127(GTA08_BOTSDO09127)
GO:0071840	BP	cellular component organization or biogenesis	3	0	3	828	1	1	gene-GTA08_BOTSDO01396(GTA08_BOTSDO01396);gene-GTA08_BOTSDO06692(GTA08_BOTSDO06692);gene-GTA08_BOTSDO11906(GTA08_BOTSDO11906)	-
GO:0016020	CC	membrane	96	78	174	2906	2.34139e-20	1.0068e-18	gene-GTA08_BOTSDO00262(GTA08_BOTSDO00262);gene-GTA08_BOTSDO00377(GTA08_BOTSDO00377);gene-GTA08_BOTSDO00735(GTA08_BOTSDO00735);gene-GTA08_BOTSDO00736(GTA08_BOTSDO00736);gene-GTA08_BOTSDO01201(GTA08_BOTSDO01201);gene-GTA08_BOTSDO01595(GTA08_BOTSDO01595);gene-GTA08_BOTSDO01707(GTA08_BOTSDO01707);gene-GTA08_BOTSDO01708(GTA08_BOTSDO01708);gene-GTA08_BOTSDO01755(GTA08_BOTSDO01755);gene-GTA08_BOTSDO0202…	gene-GTA08_BOTSDO00110(GTA08_BOTSDO00110);gene-GTA08_BOTSDO00371(GTA08_BOTSDO00371);gene-GTA08_BOTSDO00416(GTA08_BOTSDO00416);gene-GTA08_BOTSDO00650(GTA08_BOTSDO00650);gene-GTA08_BOTSDO00662(GTA08_BOTSDO00662);gene-GTA08_BOTSDO00886(GTA08_BOTSDO00886);gene-GTA08_BOTSDO01346(GTA08_BOTSDO01346);gene-GTA08_BOTSDO01505(GTA08_BOTSDO01505);gene-GTA08_BOTSDO01663(GTA08_BOTSDO01663);gene-GTA08_BOTSDO0167…
GO:0016021	CC	integral component of membrane	78	68	146	2325	2.60891e-15	4.28332e-14	gene-GTA08_BOTSDO00262(GTA08_BOTSDO00262);gene-GTA08_BOTSDO00377(GTA08_BOTSDO00377);gene-GTA08_BOTSDO00735(GTA08_BOTSDO00735);gene-GTA08_BOTSDO00736(GTA08_BOTSDO00736);gene-GTA08_BOTSDO01201(GTA08_BOTSDO01201);gene-GTA08_BOTSDO01595(GTA08_BOTSDO01595);gene-GTA08_BOTSDO01708(GTA08_BOTSDO01708);gene-GTA08_BOTSDO01755(GTA08_BOTSDO01755);gene-GTA08_BOTSDO02023(GTA08_BOTSDO02023);gene-GTA08_BOTSDO0208…	gene-GTA08_BOTSDO00110(GTA08_BOTSDO00110);gene-GTA08_BOTSDO00416(GTA08_BOTSDO00416);gene-GTA08_BOTSDO00650(GTA08_BOTSDO00650);gene-GTA08_BOTSDO00662(GTA08_BOTSDO00662);gene-GTA08_BOTSDO00886(GTA08_BOTSDO00886);gene-GTA08_BOTSDO01346(GTA08_BOTSDO01346);gene-GTA08_BOTSDO01505(GTA08_BOTSDO01505);gene-GTA08_BOTSDO01663(GTA08_BOTSDO01663);gene-GTA08_BOTSDO01670(GTA08_BOTSDO01670);gene-GTA08_BOTSDO0170…
GO:0031224	CC	intrinsic component of membrane	78	68	146	2328	2.98836e-15	4.28332e-14	gene-GTA08_BOTSDO00262(GTA08_BOTSDO00262);gene-GTA08_BOTSDO00377(GTA08_BOTSDO00377);gene-GTA08_BOTSDO00735(GTA08_BOTSDO00735);gene-GTA08_BOTSDO00736(GTA08_BOTSDO00736);gene-GTA08_BOTSDO01201(GTA08_BOTSDO01201);gene-GTA08_BOTSDO01595(GTA08_BOTSDO01595);gene-GTA08_BOTSDO01708(GTA08_BOTSDO01708);gene-GTA08_BOTSDO01755(GTA08_BOTSDO01755);gene-GTA08_BOTSDO02023(GTA08_BOTSDO02023);gene-GTA08_BOTSDO0208…	gene-GTA08_BOTSDO00110(GTA08_BOTSDO00110);gene-GTA08_BOTSDO00416(GTA08_BOTSDO00416);gene-GTA08_BOTSDO00650(GTA08_BOTSDO00650);gene-GTA08_BOTSDO00662(GTA08_BOTSDO00662);gene-GTA08_BOTSDO00886(GTA08_BOTSDO00886);gene-GTA08_BOTSDO01346(GTA08_BOTSDO01346);gene-GTA08_BOTSDO01505(GTA08_BOTSDO01505);gene-GTA08_BOTSDO01663(GTA08_BOTSDO01663);gene-GTA08_BOTSDO01670(GTA08_BOTSDO01670);gene-GTA08_BOTSDO0170…
GO:0110165	CC	cellular anatomical entity	103	95	198	4857	0.0101088	0.108669	gene-GTA08_BOTSDO00262(GTA08_BOTSDO00262);gene-GTA08_BOTSDO00377(GTA08_BOTSDO00377);gene-GTA08_BOTSDO00735(GTA08_BOTSDO00735);gene-GTA08_BOTSDO00736(GTA08_BOTSDO00736);gene-GTA08_BOTSDO00957(GTA08_BOTSDO00957);gene-GTA08_BOTSDO01182(GTA08_BOTSDO01182);gene-GTA08_BOTSDO01201(GTA08_BOTSDO01201);gene-GTA08_BOTSDO01396(GTA08_BOTSDO01396);gene-GTA08_BOTSDO01595(GTA08_BOTSDO01595);gene-GTA08_BOTSDO0170…	gene-GTA08_BOTSDO00110(GTA08_BOTSDO00110);gene-GTA08_BOTSDO00371(GTA08_BOTSDO00371);gene-GTA08_BOTSDO00416(GTA08_BOTSDO00416);gene-GTA08_BOTSDO00650(GTA08_BOTSDO00650);gene-GTA08_BOTSDO00662(GTA08_BOTSDO00662);gene-GTA08_BOTSDO00716(GTA08_BOTSDO00716);gene-GTA08_BOTSDO00886(GTA08_BOTSDO00886);gene-GTA08_BOTSDO01346(GTA08_BOTSDO01346);gene-GTA08_BOTSDO01505(GTA08_BOTSDO01505);gene-GTA08_BOTSDO0166…
GO:0005576	CC	extracellular region	0	6	6	82	0.105438	0.886165	-	gene-GTA08_BOTSDO01758(GTA08_BOTSDO01758);gene-GTA08_BOTSDO02133(GTA08_BOTSDO02133);gene-GTA08_BOTSDO05417(GTA08_BOTSDO05417);gene-GTA08_BOTSDO08012(GTA08_BOTSDO08012);gene-GTA08_BOTSDO08820(GTA08_BOTSDO08820);gene-GTA08_BOTSDO09127(GTA08_BOTSDO09127)
GO:0005618	CC	cell wall	1	1	2	17	0.144259	0.886165	gene-GTA08_BOTSDO11906(GTA08_BOTSDO11906)	gene-GTA08_BOTSDO07550(GTA08_BOTSDO07550)
GO:0030312	CC	external encapsulating structure	1	1	2	17	0.144259	0.886165	gene-GTA08_BOTSDO11906(GTA08_BOTSDO11906)	gene-GTA08_BOTSDO07550(GTA08_BOTSDO07550)
GO:1990251	CC	nuclear exosome focus	0	1	1	5	0.183204	0.984723	-	gene-GTA08_BOTSDO11445(GTA08_BOTSDO11445)
GO:0016604	CC	nuclear body	0	1	1	6	0.215622	1	-	gene-GTA08_BOTSDO11445(GTA08_BOTSDO11445)
GO:0000439	CC	transcription factor TFIIH core complex	0	1	1	7	0.246759	1	-	gene-GTA08_BOTSDO05341(GTA08_BOTSDO05341)
GO:0005887	CC	integral component of plasma membrane	0	1	1	11	0.359482	1	-	gene-GTA08_BOTSDO13953(GTA08_BOTSDO13953)
GO:0005847	CC	mRNA cleavage and polyadenylation specificity factor complex	0	1	1	12	0.384934	1	-	gene-GTA08_BOTSDO11445(GTA08_BOTSDO11445)
GO:0031226	CC	intrinsic component of plasma membrane	0	1	1	12	0.384934	1	-	gene-GTA08_BOTSDO13953(GTA08_BOTSDO13953)
GO:0005849	CC	mRNA cleavage factor complex	0	1	1	16	0.477065	1	-	gene-GTA08_BOTSDO11445(GTA08_BOTSDO11445)
GO:0070469	CC	respirasome	1	0	1	16	0.477065	1	gene-GTA08_BOTSDO10674(GTA08_BOTSDO10674)	-
GO:0005623	CC	cell	1	0	1	20	0.555454	1	gene-GTA08_BOTSDO04463(GTA08_BOTSDO04463)	-
GO:0005643	CC	nuclear pore	0	2	2	54	0.638163	1	-	gene-GTA08_BOTSDO05301(GTA08_BOTSDO05301);gene-GTA08_BOTSDO05670(GTA08_BOTSDO05670)
GO:0090575	CC	RNA polymerase II transcription regulator complex	0	1	1	31	0.715778	1	-	gene-GTA08_BOTSDO05341(GTA08_BOTSDO05341)
GO:0005667	CC	transcription regulator complex	0	1	1	36	0.768147	1	-	gene-GTA08_BOTSDO05341(GTA08_BOTSDO05341)
GO:0005886	CC	plasma membrane	1	1	2	87	0.866342	1	gene-GTA08_BOTSDO02081(GTA08_BOTSDO02081)	gene-GTA08_BOTSDO13953(GTA08_BOTSDO13953)
GO:0071944	CC	cell periphery	2	2	4	160	0.8859	1	gene-GTA08_BOTSDO02081(GTA08_BOTSDO02081);gene-GTA08_BOTSDO11906(GTA08_BOTSDO11906)	gene-GTA08_BOTSDO07550(GTA08_BOTSDO07550);gene-GTA08_BOTSDO13953(GTA08_BOTSDO13953)
GO:0005635	CC	nuclear envelope	0	2	2	94	0.893382	1	-	gene-GTA08_BOTSDO05301(GTA08_BOTSDO05301);gene-GTA08_BOTSDO05670(GTA08_BOTSDO05670)
GO:0005794	CC	Golgi apparatus	1	0	1	114	0.990589	1	gene-GTA08_BOTSDO11570(GTA08_BOTSDO11570)	-
GO:0005654	CC	nucleoplasm	0	1	1	131	0.995351	1	-	gene-GTA08_BOTSDO11445(GTA08_BOTSDO11445)
GO:0005783	CC	endoplasmic reticulum	1	0	1	149	0.997803	1	gene-GTA08_BOTSDO11570(GTA08_BOTSDO11570)	-
GO:0031967	CC	organelle envelope	0	2	2	247	0.999585	1	-	gene-GTA08_BOTSDO05301(GTA08_BOTSDO05301);gene-GTA08_BOTSDO05670(GTA08_BOTSDO05670)
GO:0031975	CC	envelope	0	2	2	247	0.999585	1	-	gene-GTA08_BOTSDO05301(GTA08_BOTSDO05301);gene-GTA08_BOTSDO05670(GTA08_BOTSDO05670)
GO:0012505	CC	endomembrane system	1	2	3	406	0.999993	1	gene-GTA08_BOTSDO11570(GTA08_BOTSDO11570)	gene-GTA08_BOTSDO05301(GTA08_BOTSDO05301);gene-GTA08_BOTSDO05670(GTA08_BOTSDO05670)
GO:0031981	CC	nuclear lumen	0	1	1	342	0.999999	1	-	gene-GTA08_BOTSDO11445(GTA08_BOTSDO11445)
GO:0005739	CC	mitochondrion	0	1	1	386	1	1	-	gene-GTA08_BOTSDO07597(GTA08_BOTSDO07597)
GO:0031974	CC	membrane-enclosed lumen	0	1	1	452	1	1	-	gene-GTA08_BOTSDO11445(GTA08_BOTSDO11445)
GO:0043233	CC	organelle lumen	0	1	1	452	1	1	-	gene-GTA08_BOTSDO11445(GTA08_BOTSDO11445)
GO:0070013	CC	intracellular organelle lumen	0	1	1	452	1	1	-	gene-GTA08_BOTSDO11445(GTA08_BOTSDO11445)
GO:0005829	CC	cytosol	1	2	3	699	1	1	gene-GTA08_BOTSDO01396(GTA08_BOTSDO01396)	gene-GTA08_BOTSDO04804(GTA08_BOTSDO04804);gene-GTA08_BOTSDO11445(GTA08_BOTSDO11445)
GO:0005634	CC	nucleus	5	6	11	1289	1	1	gene-GTA08_BOTSDO00957(GTA08_BOTSDO00957);gene-GTA08_BOTSDO01182(GTA08_BOTSDO01182);gene-GTA08_BOTSDO01396(GTA08_BOTSDO01396);gene-GTA08_BOTSDO02974(GTA08_BOTSDO02974);gene-GTA08_BOTSDO09573(GTA08_BOTSDO09573)	gene-GTA08_BOTSDO01878(GTA08_BOTSDO01878);gene-GTA08_BOTSDO05301(GTA08_BOTSDO05301);gene-GTA08_BOTSDO05341(GTA08_BOTSDO05341);gene-GTA08_BOTSDO05670(GTA08_BOTSDO05670);gene-GTA08_BOTSDO08536(GTA08_BOTSDO08536);gene-GTA08_BOTSDO11445(GTA08_BOTSDO11445)
GO:0032991	CC	protein-containing complex	0	4	4	965	1	1	-	gene-GTA08_BOTSDO05301(GTA08_BOTSDO05301);gene-GTA08_BOTSDO05341(GTA08_BOTSDO05341);gene-GTA08_BOTSDO05670(GTA08_BOTSDO05670);gene-GTA08_BOTSDO11445(GTA08_BOTSDO11445)
GO:0005575	CC	cellular_component	104	95	199	5019	1	1	gene-GTA08_BOTSDO00262(GTA08_BOTSDO00262);gene-GTA08_BOTSDO00377(GTA08_BOTSDO00377);gene-GTA08_BOTSDO00735(GTA08_BOTSDO00735);gene-GTA08_BOTSDO00736(GTA08_BOTSDO00736);gene-GTA08_BOTSDO00957(GTA08_BOTSDO00957);gene-GTA08_BOTSDO01182(GTA08_BOTSDO01182);gene-GTA08_BOTSDO01201(GTA08_BOTSDO01201);gene-GTA08_BOTSDO01396(GTA08_BOTSDO01396);gene-GTA08_BOTSDO01595(GTA08_BOTSDO01595);gene-GTA08_BOTSDO0170…	gene-GTA08_BOTSDO00110(GTA08_BOTSDO00110);gene-GTA08_BOTSDO00371(GTA08_BOTSDO00371);gene-GTA08_BOTSDO00416(GTA08_BOTSDO00416);gene-GTA08_BOTSDO00650(GTA08_BOTSDO00650);gene-GTA08_BOTSDO00662(GTA08_BOTSDO00662);gene-GTA08_BOTSDO00716(GTA08_BOTSDO00716);gene-GTA08_BOTSDO00886(GTA08_BOTSDO00886);gene-GTA08_BOTSDO01346(GTA08_BOTSDO01346);gene-GTA08_BOTSDO01505(GTA08_BOTSDO01505);gene-GTA08_BOTSDO0166…
GO:0005622	CC	intracellular	8	12	20	2583	1	1	gene-GTA08_BOTSDO00957(GTA08_BOTSDO00957);gene-GTA08_BOTSDO01182(GTA08_BOTSDO01182);gene-GTA08_BOTSDO01396(GTA08_BOTSDO01396);gene-GTA08_BOTSDO02974(GTA08_BOTSDO02974);gene-GTA08_BOTSDO06692(GTA08_BOTSDO06692);gene-GTA08_BOTSDO09573(GTA08_BOTSDO09573);gene-GTA08_BOTSDO11135(GTA08_BOTSDO11135);gene-GTA08_BOTSDO11570(GTA08_BOTSDO11570)	gene-GTA08_BOTSDO00716(GTA08_BOTSDO00716);gene-GTA08_BOTSDO01878(GTA08_BOTSDO01878);gene-GTA08_BOTSDO02221(GTA08_BOTSDO02221);gene-GTA08_BOTSDO02900(GTA08_BOTSDO02900);gene-GTA08_BOTSDO04036(GTA08_BOTSDO04036);gene-GTA08_BOTSDO04804(GTA08_BOTSDO04804);gene-GTA08_BOTSDO05301(GTA08_BOTSDO05301);gene-GTA08_BOTSDO05341(GTA08_BOTSDO05341);gene-GTA08_BOTSDO05670(GTA08_BOTSDO05670);gene-GTA08_BOTSDO0759…
GO:0005737	CC	cytoplasm	3	7	10	1624	1	1	gene-GTA08_BOTSDO01396(GTA08_BOTSDO01396);gene-GTA08_BOTSDO06692(GTA08_BOTSDO06692);gene-GTA08_BOTSDO11570(GTA08_BOTSDO11570)	gene-GTA08_BOTSDO00716(GTA08_BOTSDO00716);gene-GTA08_BOTSDO02221(GTA08_BOTSDO02221);gene-GTA08_BOTSDO02900(GTA08_BOTSDO02900);gene-GTA08_BOTSDO04036(GTA08_BOTSDO04036);gene-GTA08_BOTSDO04804(GTA08_BOTSDO04804);gene-GTA08_BOTSDO07597(GTA08_BOTSDO07597);gene-GTA08_BOTSDO11445(GTA08_BOTSDO11445)
GO:0043226	CC	organelle	6	7	13	2177	1	1	gene-GTA08_BOTSDO00957(GTA08_BOTSDO00957);gene-GTA08_BOTSDO01182(GTA08_BOTSDO01182);gene-GTA08_BOTSDO01396(GTA08_BOTSDO01396);gene-GTA08_BOTSDO02974(GTA08_BOTSDO02974);gene-GTA08_BOTSDO09573(GTA08_BOTSDO09573);gene-GTA08_BOTSDO11570(GTA08_BOTSDO11570)	gene-GTA08_BOTSDO01878(GTA08_BOTSDO01878);gene-GTA08_BOTSDO05301(GTA08_BOTSDO05301);gene-GTA08_BOTSDO05341(GTA08_BOTSDO05341);gene-GTA08_BOTSDO05670(GTA08_BOTSDO05670);gene-GTA08_BOTSDO07597(GTA08_BOTSDO07597);gene-GTA08_BOTSDO08536(GTA08_BOTSDO08536);gene-GTA08_BOTSDO11445(GTA08_BOTSDO11445)
GO:0043227	CC	membrane-bounded organelle	6	7	13	1964	1	1	gene-GTA08_BOTSDO00957(GTA08_BOTSDO00957);gene-GTA08_BOTSDO01182(GTA08_BOTSDO01182);gene-GTA08_BOTSDO01396(GTA08_BOTSDO01396);gene-GTA08_BOTSDO02974(GTA08_BOTSDO02974);gene-GTA08_BOTSDO09573(GTA08_BOTSDO09573);gene-GTA08_BOTSDO11570(GTA08_BOTSDO11570)	gene-GTA08_BOTSDO01878(GTA08_BOTSDO01878);gene-GTA08_BOTSDO05301(GTA08_BOTSDO05301);gene-GTA08_BOTSDO05341(GTA08_BOTSDO05341);gene-GTA08_BOTSDO05670(GTA08_BOTSDO05670);gene-GTA08_BOTSDO07597(GTA08_BOTSDO07597);gene-GTA08_BOTSDO08536(GTA08_BOTSDO08536);gene-GTA08_BOTSDO11445(GTA08_BOTSDO11445)
GO:0043229	CC	intracellular organelle	6	7	13	2121	1	1	gene-GTA08_BOTSDO00957(GTA08_BOTSDO00957);gene-GTA08_BOTSDO01182(GTA08_BOTSDO01182);gene-GTA08_BOTSDO01396(GTA08_BOTSDO01396);gene-GTA08_BOTSDO02974(GTA08_BOTSDO02974);gene-GTA08_BOTSDO09573(GTA08_BOTSDO09573);gene-GTA08_BOTSDO11570(GTA08_BOTSDO11570)	gene-GTA08_BOTSDO01878(GTA08_BOTSDO01878);gene-GTA08_BOTSDO05301(GTA08_BOTSDO05301);gene-GTA08_BOTSDO05341(GTA08_BOTSDO05341);gene-GTA08_BOTSDO05670(GTA08_BOTSDO05670);gene-GTA08_BOTSDO07597(GTA08_BOTSDO07597);gene-GTA08_BOTSDO08536(GTA08_BOTSDO08536);gene-GTA08_BOTSDO11445(GTA08_BOTSDO11445)
GO:0043231	CC	intracellular membrane-bounded organelle	6	7	13	1887	1	1	gene-GTA08_BOTSDO00957(GTA08_BOTSDO00957);gene-GTA08_BOTSDO01182(GTA08_BOTSDO01182);gene-GTA08_BOTSDO01396(GTA08_BOTSDO01396);gene-GTA08_BOTSDO02974(GTA08_BOTSDO02974);gene-GTA08_BOTSDO09573(GTA08_BOTSDO09573);gene-GTA08_BOTSDO11570(GTA08_BOTSDO11570)	gene-GTA08_BOTSDO01878(GTA08_BOTSDO01878);gene-GTA08_BOTSDO05301(GTA08_BOTSDO05301);gene-GTA08_BOTSDO05341(GTA08_BOTSDO05341);gene-GTA08_BOTSDO05670(GTA08_BOTSDO05670);gene-GTA08_BOTSDO07597(GTA08_BOTSDO07597);gene-GTA08_BOTSDO08536(GTA08_BOTSDO08536);gene-GTA08_BOTSDO11445(GTA08_BOTSDO11445)
GO:0003824	MF	catalytic activity	99	198	297	4407	7.70982e-16	2.35149e-13	gene-GTA08_BOTSDO00024(GTA08_BOTSDO00024);gene-GTA08_BOTSDO00293(GTA08_BOTSDO00293);gene-GTA08_BOTSDO00377(GTA08_BOTSDO00377);gene-GTA08_BOTSDO00398(GTA08_BOTSDO00398);gene-GTA08_BOTSDO00409(GTA08_BOTSDO00409);gene-GTA08_BOTSDO00584(GTA08_BOTSDO00584);gene-GTA08_BOTSDO01182(GTA08_BOTSDO01182);gene-GTA08_BOTSDO01185(GTA08_BOTSDO01185);gene-GTA08_BOTSDO01186(GTA08_BOTSDO01186);gene-GTA08_BOTSDO0119…	gene-GTA08_BOTSDO00012(GTA08_BOTSDO00012);gene-GTA08_BOTSDO00156(GTA08_BOTSDO00156);gene-GTA08_BOTSDO00332(GTA08_BOTSDO00332);gene-GTA08_BOTSDO00341(GTA08_BOTSDO00341);gene-GTA08_BOTSDO00350(GTA08_BOTSDO00350);gene-GTA08_BOTSDO00371(GTA08_BOTSDO00371);gene-GTA08_BOTSDO00382(GTA08_BOTSDO00382);gene-GTA08_BOTSDO00426(GTA08_BOTSDO00426);gene-GTA08_BOTSDO00477(GTA08_BOTSDO00477);gene-GTA08_BOTSDO0055…
GO:0016491	MF	oxidoreductase activity	34	87	121	1397	3.26445e-09	4.97829e-07	gene-GTA08_BOTSDO00398(GTA08_BOTSDO00398);gene-GTA08_BOTSDO01755(GTA08_BOTSDO01755);gene-GTA08_BOTSDO02023(GTA08_BOTSDO02023);gene-GTA08_BOTSDO03164(GTA08_BOTSDO03164);gene-GTA08_BOTSDO03718(GTA08_BOTSDO03718);gene-GTA08_BOTSDO04104(GTA08_BOTSDO04104);gene-GTA08_BOTSDO04504(GTA08_BOTSDO04504);gene-GTA08_BOTSDO04923(GTA08_BOTSDO04923);gene-GTA08_BOTSDO05313(GTA08_BOTSDO05313);gene-GTA08_BOTSDO0542…	gene-GTA08_BOTSDO00341(GTA08_BOTSDO00341);gene-GTA08_BOTSDO00371(GTA08_BOTSDO00371);gene-GTA08_BOTSDO00382(GTA08_BOTSDO00382);gene-GTA08_BOTSDO00477(GTA08_BOTSDO00477);gene-GTA08_BOTSDO00551(GTA08_BOTSDO00551);gene-GTA08_BOTSDO00783(GTA08_BOTSDO00783);gene-GTA08_BOTSDO00887(GTA08_BOTSDO00887);gene-GTA08_BOTSDO01347(GTA08_BOTSDO01347);gene-GTA08_BOTSDO01414(GTA08_BOTSDO01414);gene-GTA08_BOTSDO0150…
GO:0048037	MF	cofactor binding	24	40	64	753	9.4011e-05	0.00955778	gene-GTA08_BOTSDO00398(GTA08_BOTSDO00398);gene-GTA08_BOTSDO01396(GTA08_BOTSDO01396);gene-GTA08_BOTSDO01755(GTA08_BOTSDO01755);gene-GTA08_BOTSDO02023(GTA08_BOTSDO02023);gene-GTA08_BOTSDO02628(GTA08_BOTSDO02628);gene-GTA08_BOTSDO03718(GTA08_BOTSDO03718);gene-GTA08_BOTSDO04104(GTA08_BOTSDO04104);gene-GTA08_BOTSDO04504(GTA08_BOTSDO04504);gene-GTA08_BOTSDO05421(GTA08_BOTSDO05421);gene-GTA08_BOTSDO0583…	gene-GTA08_BOTSDO00341(GTA08_BOTSDO00341);gene-GTA08_BOTSDO00382(GTA08_BOTSDO00382);gene-GTA08_BOTSDO00783(GTA08_BOTSDO00783);gene-GTA08_BOTSDO01663(GTA08_BOTSDO01663);gene-GTA08_BOTSDO01670(GTA08_BOTSDO01670);gene-GTA08_BOTSDO01717(GTA08_BOTSDO01717);gene-GTA08_BOTSDO01731(GTA08_BOTSDO01731);gene-GTA08_BOTSDO01818(GTA08_BOTSDO01818);gene-GTA08_BOTSDO01846(GTA08_BOTSDO01846);gene-GTA08_BOTSDO0264…
GO:0004371	MF	glycerone kinase activity	0	3	3	4	0.000592276	0.0417675	-	gene-GTA08_BOTSDO04147(GTA08_BOTSDO04147);gene-GTA08_BOTSDO07933(GTA08_BOTSDO07933);gene-GTA08_BOTSDO09111(GTA08_BOTSDO09111)
GO:0005506	MF	iron ion binding	11	15	26	250	0.000847203	0.0417675	gene-GTA08_BOTSDO01755(GTA08_BOTSDO01755);gene-GTA08_BOTSDO02023(GTA08_BOTSDO02023);gene-GTA08_BOTSDO07625(GTA08_BOTSDO07625);gene-GTA08_BOTSDO09565(GTA08_BOTSDO09565);gene-GTA08_BOTSDO10475(GTA08_BOTSDO10475);gene-GTA08_BOTSDO10523(GTA08_BOTSDO10523);gene-GTA08_BOTSDO11588(GTA08_BOTSDO11588);gene-GTA08_BOTSDO13211(GTA08_BOTSDO13211);gene-GTA08_BOTSDO13638(GTA08_BOTSDO13638);gene-GTA08_BOTSDO1363…	gene-GTA08_BOTSDO00382(GTA08_BOTSDO00382);gene-GTA08_BOTSDO01663(GTA08_BOTSDO01663);gene-GTA08_BOTSDO01670(GTA08_BOTSDO01670);gene-GTA08_BOTSDO01731(GTA08_BOTSDO01731);gene-GTA08_BOTSDO01846(GTA08_BOTSDO01846);gene-GTA08_BOTSDO02767(GTA08_BOTSDO02767);gene-GTA08_BOTSDO03610(GTA08_BOTSDO03610);gene-GTA08_BOTSDO04127(GTA08_BOTSDO04127);gene-GTA08_BOTSDO04928(GTA08_BOTSDO04928);gene-GTA08_BOTSDO0507…
GO:0020037	MF	heme binding	11	13	24	226	0.000996493	0.0417675	gene-GTA08_BOTSDO01755(GTA08_BOTSDO01755);gene-GTA08_BOTSDO02023(GTA08_BOTSDO02023);gene-GTA08_BOTSDO05830(GTA08_BOTSDO05830);gene-GTA08_BOTSDO07625(GTA08_BOTSDO07625);gene-GTA08_BOTSDO09565(GTA08_BOTSDO09565);gene-GTA08_BOTSDO09581(GTA08_BOTSDO09581);gene-GTA08_BOTSDO10475(GTA08_BOTSDO10475);gene-GTA08_BOTSDO10523(GTA08_BOTSDO10523);gene-GTA08_BOTSDO11588(GTA08_BOTSDO11588);gene-GTA08_BOTSDO1363…	gene-GTA08_BOTSDO00382(GTA08_BOTSDO00382);gene-GTA08_BOTSDO01663(GTA08_BOTSDO01663);gene-GTA08_BOTSDO01670(GTA08_BOTSDO01670);gene-GTA08_BOTSDO01731(GTA08_BOTSDO01731);gene-GTA08_BOTSDO01846(GTA08_BOTSDO01846);gene-GTA08_BOTSDO02767(GTA08_BOTSDO02767);gene-GTA08_BOTSDO03610(GTA08_BOTSDO03610);gene-GTA08_BOTSDO04127(GTA08_BOTSDO04127);gene-GTA08_BOTSDO05071(GTA08_BOTSDO05071);gene-GTA08_BOTSDO1125…
GO:0046906	MF	tetrapyrrole binding	11	13	24	226	0.000996493	0.0417675	gene-GTA08_BOTSDO01755(GTA08_BOTSDO01755);gene-GTA08_BOTSDO02023(GTA08_BOTSDO02023);gene-GTA08_BOTSDO05830(GTA08_BOTSDO05830);gene-GTA08_BOTSDO07625(GTA08_BOTSDO07625);gene-GTA08_BOTSDO09565(GTA08_BOTSDO09565);gene-GTA08_BOTSDO09581(GTA08_BOTSDO09581);gene-GTA08_BOTSDO10475(GTA08_BOTSDO10475);gene-GTA08_BOTSDO10523(GTA08_BOTSDO10523);gene-GTA08_BOTSDO11588(GTA08_BOTSDO11588);gene-GTA08_BOTSDO1363…	gene-GTA08_BOTSDO00382(GTA08_BOTSDO00382);gene-GTA08_BOTSDO01663(GTA08_BOTSDO01663);gene-GTA08_BOTSDO01670(GTA08_BOTSDO01670);gene-GTA08_BOTSDO01731(GTA08_BOTSDO01731);gene-GTA08_BOTSDO01846(GTA08_BOTSDO01846);gene-GTA08_BOTSDO02767(GTA08_BOTSDO02767);gene-GTA08_BOTSDO03610(GTA08_BOTSDO03610);gene-GTA08_BOTSDO04127(GTA08_BOTSDO04127);gene-GTA08_BOTSDO05071(GTA08_BOTSDO05071);gene-GTA08_BOTSDO1125…
GO:0008236	MF	serine-type peptidase activity	2	8	10	61	0.00136943	0.0417675	gene-GTA08_BOTSDO08711(GTA08_BOTSDO08711);gene-GTA08_BOTSDO09315(GTA08_BOTSDO09315)	gene-GTA08_BOTSDO00884(GTA08_BOTSDO00884);gene-GTA08_BOTSDO03475(GTA08_BOTSDO03475);gene-GTA08_BOTSDO03986(GTA08_BOTSDO03986);gene-GTA08_BOTSDO07550(GTA08_BOTSDO07550);gene-GTA08_BOTSDO08773(GTA08_BOTSDO08773);gene-GTA08_BOTSDO08822(GTA08_BOTSDO08822);gene-GTA08_BOTSDO08828(GTA08_BOTSDO08828);gene-GTA08_BOTSDO09127(GTA08_BOTSDO09127)
GO:0016825	MF	hydrolase activity, acting on acid phosphorus-nitrogen bonds	2	8	10	61	0.00136943	0.0417675	gene-GTA08_BOTSDO08711(GTA08_BOTSDO08711);gene-GTA08_BOTSDO09315(GTA08_BOTSDO09315)	gene-GTA08_BOTSDO00884(GTA08_BOTSDO00884);gene-GTA08_BOTSDO03475(GTA08_BOTSDO03475);gene-GTA08_BOTSDO03986(GTA08_BOTSDO03986);gene-GTA08_BOTSDO07550(GTA08_BOTSDO07550);gene-GTA08_BOTSDO08773(GTA08_BOTSDO08773);gene-GTA08_BOTSDO08822(GTA08_BOTSDO08822);gene-GTA08_BOTSDO08828(GTA08_BOTSDO08828);gene-GTA08_BOTSDO09127(GTA08_BOTSDO09127)
GO:0017171	MF	serine hydrolase activity	2	8	10	61	0.00136943	0.0417675	gene-GTA08_BOTSDO08711(GTA08_BOTSDO08711);gene-GTA08_BOTSDO09315(GTA08_BOTSDO09315)	gene-GTA08_BOTSDO00884(GTA08_BOTSDO00884);gene-GTA08_BOTSDO03475(GTA08_BOTSDO03475);gene-GTA08_BOTSDO03986(GTA08_BOTSDO03986);gene-GTA08_BOTSDO07550(GTA08_BOTSDO07550);gene-GTA08_BOTSDO08773(GTA08_BOTSDO08773);gene-GTA08_BOTSDO08822(GTA08_BOTSDO08822);gene-GTA08_BOTSDO08828(GTA08_BOTSDO08828);gene-GTA08_BOTSDO09127(GTA08_BOTSDO09127)
GO:0016705	MF	oxidoreductase activity, acting on paired donors, with incorporation or reduction of molecular oxygen	9	15	24	237	0.00192162	0.0532812	gene-GTA08_BOTSDO01755(GTA08_BOTSDO01755);gene-GTA08_BOTSDO02023(GTA08_BOTSDO02023);gene-GTA08_BOTSDO07625(GTA08_BOTSDO07625);gene-GTA08_BOTSDO09565(GTA08_BOTSDO09565);gene-GTA08_BOTSDO10475(GTA08_BOTSDO10475);gene-GTA08_BOTSDO10523(GTA08_BOTSDO10523);gene-GTA08_BOTSDO11588(GTA08_BOTSDO11588);gene-GTA08_BOTSDO13639(GTA08_BOTSDO13639);gene-GTA08_BOTSDO13964(GTA08_BOTSDO13964)	gene-GTA08_BOTSDO00382(GTA08_BOTSDO00382);gene-GTA08_BOTSDO00783(GTA08_BOTSDO00783);gene-GTA08_BOTSDO01663(GTA08_BOTSDO01663);gene-GTA08_BOTSDO01670(GTA08_BOTSDO01670);gene-GTA08_BOTSDO01731(GTA08_BOTSDO01731);gene-GTA08_BOTSDO01846(GTA08_BOTSDO01846);gene-GTA08_BOTSDO02767(GTA08_BOTSDO02767);gene-GTA08_BOTSDO03610(GTA08_BOTSDO03610);gene-GTA08_BOTSDO04127(GTA08_BOTSDO04127);gene-GTA08_BOTSDO0507…
GO:0030246	MF	carbohydrate binding	2	8	10	66	0.00252397	0.0604578	gene-GTA08_BOTSDO04463(GTA08_BOTSDO04463);gene-GTA08_BOTSDO07781(GTA08_BOTSDO07781)	gene-GTA08_BOTSDO01891(GTA08_BOTSDO01891);gene-GTA08_BOTSDO02133(GTA08_BOTSDO02133);gene-GTA08_BOTSDO03803(GTA08_BOTSDO03803);gene-GTA08_BOTSDO05417(GTA08_BOTSDO05417);gene-GTA08_BOTSDO08820(GTA08_BOTSDO08820);gene-GTA08_BOTSDO09850(GTA08_BOTSDO09850);gene-GTA08_BOTSDO11553(GTA08_BOTSDO11553);gene-GTA08_BOTSDO12953(GTA08_BOTSDO12953)
GO:0004497	MF	monooxygenase activity	9	17	26	270	0.00257689	0.0604578	gene-GTA08_BOTSDO01755(GTA08_BOTSDO01755);gene-GTA08_BOTSDO02023(GTA08_BOTSDO02023);gene-GTA08_BOTSDO03718(GTA08_BOTSDO03718);gene-GTA08_BOTSDO07625(GTA08_BOTSDO07625);gene-GTA08_BOTSDO09565(GTA08_BOTSDO09565);gene-GTA08_BOTSDO10475(GTA08_BOTSDO10475);gene-GTA08_BOTSDO10523(GTA08_BOTSDO10523);gene-GTA08_BOTSDO11079(GTA08_BOTSDO11079);gene-GTA08_BOTSDO13639(GTA08_BOTSDO13639)	gene-GTA08_BOTSDO00382(GTA08_BOTSDO00382);gene-GTA08_BOTSDO00783(GTA08_BOTSDO00783);gene-GTA08_BOTSDO01663(GTA08_BOTSDO01663);gene-GTA08_BOTSDO01670(GTA08_BOTSDO01670);gene-GTA08_BOTSDO01731(GTA08_BOTSDO01731);gene-GTA08_BOTSDO01846(GTA08_BOTSDO01846);gene-GTA08_BOTSDO02647(GTA08_BOTSDO02647);gene-GTA08_BOTSDO03610(GTA08_BOTSDO03610);gene-GTA08_BOTSDO04127(GTA08_BOTSDO04127);gene-GTA08_BOTSDO0507…
GO:0004175	MF	endopeptidase activity	2	11	13	104	0.00359529	0.07619	gene-GTA08_BOTSDO06236(GTA08_BOTSDO06236);gene-GTA08_BOTSDO07349(GTA08_BOTSDO07349)	gene-GTA08_BOTSDO01758(GTA08_BOTSDO01758);gene-GTA08_BOTSDO03475(GTA08_BOTSDO03475);gene-GTA08_BOTSDO03981(GTA08_BOTSDO03981);gene-GTA08_BOTSDO04544(GTA08_BOTSDO04544);gene-GTA08_BOTSDO07307(GTA08_BOTSDO07307);gene-GTA08_BOTSDO07550(GTA08_BOTSDO07550);gene-GTA08_BOTSDO08012(GTA08_BOTSDO08012);gene-GTA08_BOTSDO08773(GTA08_BOTSDO08773);gene-GTA08_BOTSDO08822(GTA08_BOTSDO08822);gene-GTA08_BOTSDO0882…
GO:0008484	MF	sulfuric ester hydrolase activity	0	4	4	13	0.00398788	0.07619	-	gene-GTA08_BOTSDO03896(GTA08_BOTSDO03896);gene-GTA08_BOTSDO04005(GTA08_BOTSDO04005);gene-GTA08_BOTSDO05896(GTA08_BOTSDO05896);gene-GTA08_BOTSDO07451(GTA08_BOTSDO07451)
GO:0004190	MF	aspartic-type endopeptidase activity	2	4	6	30	0.00457874	0.07619	gene-GTA08_BOTSDO06236(GTA08_BOTSDO06236);gene-GTA08_BOTSDO07349(GTA08_BOTSDO07349)	gene-GTA08_BOTSDO03981(GTA08_BOTSDO03981);gene-GTA08_BOTSDO04544(GTA08_BOTSDO04544);gene-GTA08_BOTSDO07307(GTA08_BOTSDO07307);gene-GTA08_BOTSDO10425(GTA08_BOTSDO10425)
GO:0070001	MF	aspartic-type peptidase activity	2	4	6	30	0.00457874	0.07619	gene-GTA08_BOTSDO06236(GTA08_BOTSDO06236);gene-GTA08_BOTSDO07349(GTA08_BOTSDO07349)	gene-GTA08_BOTSDO03981(GTA08_BOTSDO03981);gene-GTA08_BOTSDO04544(GTA08_BOTSDO04544);gene-GTA08_BOTSDO07307(GTA08_BOTSDO07307);gene-GTA08_BOTSDO10425(GTA08_BOTSDO10425)
GO:0008131	MF	primary amine oxidase activity	0	3	3	7	0.00458822	0.07619	-	gene-GTA08_BOTSDO01717(GTA08_BOTSDO01717);gene-GTA08_BOTSDO09755(GTA08_BOTSDO09755);gene-GTA08_BOTSDO10310(GTA08_BOTSDO10310)
GO:0016787	MF	hydrolase activity	30	69	99	1460	0.00474626	0.07619	gene-GTA08_BOTSDO00377(GTA08_BOTSDO00377);gene-GTA08_BOTSDO01182(GTA08_BOTSDO01182);gene-GTA08_BOTSDO01290(GTA08_BOTSDO01290);gene-GTA08_BOTSDO03252(GTA08_BOTSDO03252);gene-GTA08_BOTSDO03712(GTA08_BOTSDO03712);gene-GTA08_BOTSDO03964(GTA08_BOTSDO03964);gene-GTA08_BOTSDO05188(GTA08_BOTSDO05188);gene-GTA08_BOTSDO05268(GTA08_BOTSDO05268);gene-GTA08_BOTSDO05276(GTA08_BOTSDO05276);gene-GTA08_BOTSDO0596…	gene-GTA08_BOTSDO00012(GTA08_BOTSDO00012);gene-GTA08_BOTSDO00332(GTA08_BOTSDO00332);gene-GTA08_BOTSDO00350(GTA08_BOTSDO00350);gene-GTA08_BOTSDO00426(GTA08_BOTSDO00426);gene-GTA08_BOTSDO00662(GTA08_BOTSDO00662);gene-GTA08_BOTSDO00884(GTA08_BOTSDO00884);gene-GTA08_BOTSDO01347(GTA08_BOTSDO01347);gene-GTA08_BOTSDO01564(GTA08_BOTSDO01564);gene-GTA08_BOTSDO01758(GTA08_BOTSDO01758);gene-GTA08_BOTSDO0189…
GO:0030976	MF	thiamine pyrophosphate binding	1	2	3	9	0.0101588	0.154922	gene-GTA08_BOTSDO07016(GTA08_BOTSDO07016)	gene-GTA08_BOTSDO01818(GTA08_BOTSDO01818);gene-GTA08_BOTSDO13890(GTA08_BOTSDO13890)
GO:0016798	MF	hydrolase activity, acting on glycosyl bonds	6	19	25	288	0.0115095	0.167162	gene-GTA08_BOTSDO01290(GTA08_BOTSDO01290);gene-GTA08_BOTSDO05188(GTA08_BOTSDO05188);gene-GTA08_BOTSDO10192(GTA08_BOTSDO10192);gene-GTA08_BOTSDO10386(GTA08_BOTSDO10386);gene-GTA08_BOTSDO10962(GTA08_BOTSDO10962);gene-GTA08_BOTSDO11906(GTA08_BOTSDO11906)	gene-GTA08_BOTSDO00012(GTA08_BOTSDO00012);gene-GTA08_BOTSDO01564(GTA08_BOTSDO01564);gene-GTA08_BOTSDO02133(GTA08_BOTSDO02133);gene-GTA08_BOTSDO02303(GTA08_BOTSDO02303);gene-GTA08_BOTSDO03710(GTA08_BOTSDO03710);gene-GTA08_BOTSDO03803(GTA08_BOTSDO03803);gene-GTA08_BOTSDO03804(GTA08_BOTSDO03804);gene-GTA08_BOTSDO05341(GTA08_BOTSDO05341);gene-GTA08_BOTSDO05417(GTA08_BOTSDO05417);gene-GTA08_BOTSDO0610…
GO:0050662	MF	coenzyme binding	12	24	36	459	0.0130283	0.180619	gene-GTA08_BOTSDO00398(GTA08_BOTSDO00398);gene-GTA08_BOTSDO02628(GTA08_BOTSDO02628);gene-GTA08_BOTSDO03718(GTA08_BOTSDO03718);gene-GTA08_BOTSDO04104(GTA08_BOTSDO04104);gene-GTA08_BOTSDO04504(GTA08_BOTSDO04504);gene-GTA08_BOTSDO05421(GTA08_BOTSDO05421);gene-GTA08_BOTSDO06148(GTA08_BOTSDO06148);gene-GTA08_BOTSDO06380(GTA08_BOTSDO06380);gene-GTA08_BOTSDO07016(GTA08_BOTSDO07016);gene-GTA08_BOTSDO1035…	gene-GTA08_BOTSDO00341(GTA08_BOTSDO00341);gene-GTA08_BOTSDO00783(GTA08_BOTSDO00783);gene-GTA08_BOTSDO01818(GTA08_BOTSDO01818);gene-GTA08_BOTSDO02647(GTA08_BOTSDO02647);gene-GTA08_BOTSDO02849(GTA08_BOTSDO02849);gene-GTA08_BOTSDO03886(GTA08_BOTSDO03886);gene-GTA08_BOTSDO04126(GTA08_BOTSDO04126);gene-GTA08_BOTSDO04889(GTA08_BOTSDO04889);gene-GTA08_BOTSDO05316(GTA08_BOTSDO05316);gene-GTA08_BOTSDO0551…
GO:0048038	MF	quinone binding	0	3	3	10	0.0139416	0.181325	-	gene-GTA08_BOTSDO01717(GTA08_BOTSDO01717);gene-GTA08_BOTSDO09755(GTA08_BOTSDO09755);gene-GTA08_BOTSDO10310(GTA08_BOTSDO10310)
GO:0004553	MF	hydrolase activity, hydrolyzing O-glycosyl compounds	5	17	22	249	0.0142682	0.181325	gene-GTA08_BOTSDO05188(GTA08_BOTSDO05188);gene-GTA08_BOTSDO10192(GTA08_BOTSDO10192);gene-GTA08_BOTSDO10386(GTA08_BOTSDO10386);gene-GTA08_BOTSDO10962(GTA08_BOTSDO10962);gene-GTA08_BOTSDO11906(GTA08_BOTSDO11906)	gene-GTA08_BOTSDO00012(GTA08_BOTSDO00012);gene-GTA08_BOTSDO02133(GTA08_BOTSDO02133);gene-GTA08_BOTSDO02303(GTA08_BOTSDO02303);gene-GTA08_BOTSDO03710(GTA08_BOTSDO03710);gene-GTA08_BOTSDO03804(GTA08_BOTSDO03804);gene-GTA08_BOTSDO05341(GTA08_BOTSDO05341);gene-GTA08_BOTSDO05417(GTA08_BOTSDO05417);gene-GTA08_BOTSDO06108(GTA08_BOTSDO06108);gene-GTA08_BOTSDO06666(GTA08_BOTSDO06666);gene-GTA08_BOTSDO0740…
GO:0016684	MF	oxidoreductase activity, acting on peroxide as acceptor	3	4	7	50	0.0165904	0.200772	gene-GTA08_BOTSDO05830(GTA08_BOTSDO05830);gene-GTA08_BOTSDO09581(GTA08_BOTSDO09581);gene-GTA08_BOTSDO13964(GTA08_BOTSDO13964)	gene-GTA08_BOTSDO01875(GTA08_BOTSDO01875);gene-GTA08_BOTSDO01877(GTA08_BOTSDO01877);gene-GTA08_BOTSDO02767(GTA08_BOTSDO02767);gene-GTA08_BOTSDO12189(GTA08_BOTSDO12189)
GO:0070011	MF	peptidase activity, acting on L-amino acid peptides	4	16	20	224	0.017115	0.200772	gene-GTA08_BOTSDO06236(GTA08_BOTSDO06236);gene-GTA08_BOTSDO07349(GTA08_BOTSDO07349);gene-GTA08_BOTSDO08711(GTA08_BOTSDO08711);gene-GTA08_BOTSDO09315(GTA08_BOTSDO09315)	gene-GTA08_BOTSDO00884(GTA08_BOTSDO00884);gene-GTA08_BOTSDO01758(GTA08_BOTSDO01758);gene-GTA08_BOTSDO02339(GTA08_BOTSDO02339);gene-GTA08_BOTSDO03475(GTA08_BOTSDO03475);gene-GTA08_BOTSDO03981(GTA08_BOTSDO03981);gene-GTA08_BOTSDO03986(GTA08_BOTSDO03986);gene-GTA08_BOTSDO04544(GTA08_BOTSDO04544);gene-GTA08_BOTSDO05396(GTA08_BOTSDO05396);gene-GTA08_BOTSDO07307(GTA08_BOTSDO07307);gene-GTA08_BOTSDO0755…
GO:0004252	MF	serine-type endopeptidase activity	0	5	5	30	0.0205001	0.231575	-	gene-GTA08_BOTSDO03475(GTA08_BOTSDO03475);gene-GTA08_BOTSDO07550(GTA08_BOTSDO07550);gene-GTA08_BOTSDO08773(GTA08_BOTSDO08773);gene-GTA08_BOTSDO08822(GTA08_BOTSDO08822);gene-GTA08_BOTSDO08828(GTA08_BOTSDO08828)
GO:0051213	MF	dioxygenase activity	2	9	11	104	0.0233319	0.248169	gene-GTA08_BOTSDO07895(GTA08_BOTSDO07895);gene-GTA08_BOTSDO13211(GTA08_BOTSDO13211)	gene-GTA08_BOTSDO00551(GTA08_BOTSDO00551);gene-GTA08_BOTSDO01414(GTA08_BOTSDO01414);gene-GTA08_BOTSDO01506(GTA08_BOTSDO01506);gene-GTA08_BOTSDO02306(GTA08_BOTSDO02306);gene-GTA08_BOTSDO05765(GTA08_BOTSDO05765);gene-GTA08_BOTSDO06534(GTA08_BOTSDO06534);gene-GTA08_BOTSDO06655(GTA08_BOTSDO06655);gene-GTA08_BOTSDO13635(GTA08_BOTSDO13635);gene-GTA08_BOTSDO13710(GTA08_BOTSDO13710)
GO:0016641	MF	oxidoreductase activity, acting on the CH-NH2 group of donors, oxygen as acceptor	0	3	3	12	0.0235964	0.248169	-	gene-GTA08_BOTSDO01717(GTA08_BOTSDO01717);gene-GTA08_BOTSDO09755(GTA08_BOTSDO09755);gene-GTA08_BOTSDO10310(GTA08_BOTSDO10310)
GO:0004334	MF	fumarylacetoacetase activity	0	2	2	5	0.0258788	0.249776	-	gene-GTA08_BOTSDO06978(GTA08_BOTSDO06978);gene-GTA08_BOTSDO11171(GTA08_BOTSDO11171)
GO:0005507	MF	copper ion binding	3	3	6	43	0.026206	0.249776	gene-GTA08_BOTSDO05313(GTA08_BOTSDO05313);gene-GTA08_BOTSDO11748(GTA08_BOTSDO11748);gene-GTA08_BOTSDO14120(GTA08_BOTSDO14120)	gene-GTA08_BOTSDO01717(GTA08_BOTSDO01717);gene-GTA08_BOTSDO09755(GTA08_BOTSDO09755);gene-GTA08_BOTSDO10310(GTA08_BOTSDO10310)
GO:0016903	MF	oxidoreductase activity, acting on the aldehyde or oxo group of donors	0	6	6	43	0.026206	0.249776	-	gene-GTA08_BOTSDO01909(GTA08_BOTSDO01909);gene-GTA08_BOTSDO01958(GTA08_BOTSDO01958);gene-GTA08_BOTSDO08028(GTA08_BOTSDO08028);gene-GTA08_BOTSDO10253(GTA08_BOTSDO10253);gene-GTA08_BOTSDO12745(GTA08_BOTSDO12745);gene-GTA08_BOTSDO13246(GTA08_BOTSDO13246)
GO:0004659	MF	prenyltransferase activity	3	0	3	13	0.029479	0.260367	gene-GTA08_BOTSDO01193(GTA08_BOTSDO01193);gene-GTA08_BOTSDO09576(GTA08_BOTSDO09576);gene-GTA08_BOTSDO09620(GTA08_BOTSDO09620)	-
GO:0050660	MF	flavin adenine dinucleotide binding	6	13	19	223	0.0305458	0.260367	gene-GTA08_BOTSDO03718(GTA08_BOTSDO03718);gene-GTA08_BOTSDO04104(GTA08_BOTSDO04104);gene-GTA08_BOTSDO04504(GTA08_BOTSDO04504);gene-GTA08_BOTSDO05421(GTA08_BOTSDO05421);gene-GTA08_BOTSDO11079(GTA08_BOTSDO11079);gene-GTA08_BOTSDO13637(GTA08_BOTSDO13637)	gene-GTA08_BOTSDO00341(GTA08_BOTSDO00341);gene-GTA08_BOTSDO00783(GTA08_BOTSDO00783);gene-GTA08_BOTSDO02647(GTA08_BOTSDO02647);gene-GTA08_BOTSDO05316(GTA08_BOTSDO05316);gene-GTA08_BOTSDO05511(GTA08_BOTSDO05511);gene-GTA08_BOTSDO05861(GTA08_BOTSDO05861);gene-GTA08_BOTSDO06384(GTA08_BOTSDO06384);gene-GTA08_BOTSDO06395(GTA08_BOTSDO06395);gene-GTA08_BOTSDO06896(GTA08_BOTSDO06896);gene-GTA08_BOTSDO0803…
GO:1901681	MF	sulfur compound binding	1	2	3	14	0.0360598	0.260367	gene-GTA08_BOTSDO07016(GTA08_BOTSDO07016)	gene-GTA08_BOTSDO01818(GTA08_BOTSDO01818);gene-GTA08_BOTSDO13890(GTA08_BOTSDO13890)
GO:0033961	MF	cis-stilbene-oxide hydrolase activity	1	1	2	6	0.0374531	0.260367	gene-GTA08_BOTSDO05276(GTA08_BOTSDO05276)	gene-GTA08_BOTSDO05149(GTA08_BOTSDO05149)
GO:0016620	MF	oxidoreductase activity, acting on the aldehyde or oxo group of donors, NAD or NADP as acceptor	0	5	5	35	0.0375734	0.260367	-	gene-GTA08_BOTSDO01958(GTA08_BOTSDO01958);gene-GTA08_BOTSDO08028(GTA08_BOTSDO08028);gene-GTA08_BOTSDO10253(GTA08_BOTSDO10253);gene-GTA08_BOTSDO12745(GTA08_BOTSDO12745);gene-GTA08_BOTSDO13246(GTA08_BOTSDO13246)
GO:0016209	MF	antioxidant activity	3	4	7	60	0.0407529	0.260367	gene-GTA08_BOTSDO05830(GTA08_BOTSDO05830);gene-GTA08_BOTSDO09581(GTA08_BOTSDO09581);gene-GTA08_BOTSDO13964(GTA08_BOTSDO13964)	gene-GTA08_BOTSDO01875(GTA08_BOTSDO01875);gene-GTA08_BOTSDO01877(GTA08_BOTSDO01877);gene-GTA08_BOTSDO02767(GTA08_BOTSDO02767);gene-GTA08_BOTSDO12189(GTA08_BOTSDO12189)
GO:0016627	MF	oxidoreductase activity, acting on the CH-CH group of donors	1	6	7	60	0.0407529	0.260367	gene-GTA08_BOTSDO13426(GTA08_BOTSDO13426)	gene-GTA08_BOTSDO02849(GTA08_BOTSDO02849);gene-GTA08_BOTSDO04836(GTA08_BOTSDO04836);gene-GTA08_BOTSDO05316(GTA08_BOTSDO05316);gene-GTA08_BOTSDO06384(GTA08_BOTSDO06384);gene-GTA08_BOTSDO08030(GTA08_BOTSDO08030);gene-GTA08_BOTSDO08031(GTA08_BOTSDO08031)
GO:0008233	MF	peptidase activity	4	16	20	249	0.045867	0.260367	gene-GTA08_BOTSDO06236(GTA08_BOTSDO06236);gene-GTA08_BOTSDO07349(GTA08_BOTSDO07349);gene-GTA08_BOTSDO08711(GTA08_BOTSDO08711);gene-GTA08_BOTSDO09315(GTA08_BOTSDO09315)	gene-GTA08_BOTSDO00884(GTA08_BOTSDO00884);gene-GTA08_BOTSDO01758(GTA08_BOTSDO01758);gene-GTA08_BOTSDO02339(GTA08_BOTSDO02339);gene-GTA08_BOTSDO03475(GTA08_BOTSDO03475);gene-GTA08_BOTSDO03981(GTA08_BOTSDO03981);gene-GTA08_BOTSDO03986(GTA08_BOTSDO03986);gene-GTA08_BOTSDO04544(GTA08_BOTSDO04544);gene-GTA08_BOTSDO05396(GTA08_BOTSDO05396);gene-GTA08_BOTSDO07307(GTA08_BOTSDO07307);gene-GTA08_BOTSDO0755…
GO:0016803	MF	ether hydrolase activity	1	1	2	7	0.0505991	0.260367	gene-GTA08_BOTSDO05276(GTA08_BOTSDO05276)	gene-GTA08_BOTSDO05149(GTA08_BOTSDO05149)
GO:0016822	MF	hydrolase activity, acting on acid carbon-carbon bonds	0	2	2	7	0.0505991	0.260367	-	gene-GTA08_BOTSDO06978(GTA08_BOTSDO06978);gene-GTA08_BOTSDO11171(GTA08_BOTSDO11171)
GO:0016823	MF	hydrolase activity, acting on acid carbon-carbon bonds, in ketonic substances	0	2	2	7	0.0505991	0.260367	-	gene-GTA08_BOTSDO06978(GTA08_BOTSDO06978);gene-GTA08_BOTSDO11171(GTA08_BOTSDO11171)
GO:0030248	MF	cellulose binding	0	3	3	16	0.0512648	0.260367	-	gene-GTA08_BOTSDO02133(GTA08_BOTSDO02133);gene-GTA08_BOTSDO05417(GTA08_BOTSDO05417);gene-GTA08_BOTSDO08820(GTA08_BOTSDO08820)
GO:0004337	MF	geranyltranstransferase activity	1	0	1	1	0.0537807	0.260367	gene-GTA08_BOTSDO01193(GTA08_BOTSDO01193)	-
GO:0004491	MF	methylmalonate-semialdehyde dehydrogenase (acylating) activity	0	1	1	1	0.0537807	0.260367	-	gene-GTA08_BOTSDO13246(GTA08_BOTSDO13246)
GO:0004608	MF	phosphatidylethanolamine N-methyltransferase activity	0	1	1	1	0.0537807	0.260367	-	gene-GTA08_BOTSDO01769(GTA08_BOTSDO01769)
GO:0005354	MF	galactose transmembrane transporter activity	0	1	1	1	0.0537807	0.260367	-	gene-GTA08_BOTSDO13953(GTA08_BOTSDO13953)
GO:0008812	MF	choline dehydrogenase activity	0	1	1	1	0.0537807	0.260367	-	gene-GTA08_BOTSDO13523(GTA08_BOTSDO13523)
GO:0008887	MF	glycerate kinase activity	1	0	1	1	0.0537807	0.260367	gene-GTA08_BOTSDO03374(GTA08_BOTSDO03374)	-
GO:0009679	MF	hexose:proton symporter activity	0	1	1	1	0.0537807	0.260367	-	gene-GTA08_BOTSDO13953(GTA08_BOTSDO13953)
GO:0009916	MF	alternative oxidase activity	1	0	1	1	0.0537807	0.260367	gene-GTA08_BOTSDO10674(GTA08_BOTSDO10674)	-
GO:0010333	MF	terpene synthase activity	1	0	1	1	0.0537807	0.260367	gene-GTA08_BOTSDO00584(GTA08_BOTSDO00584)	-
GO:0015140	MF	malate transmembrane transporter activity	1	0	1	1	0.0537807	0.260367	gene-GTA08_BOTSDO04858(GTA08_BOTSDO04858)	-
GO:0015146	MF	pentose transmembrane transporter activity	0	1	1	1	0.0537807	0.260367	-	gene-GTA08_BOTSDO13953(GTA08_BOTSDO13953)
GO:0015150	MF	fucose transmembrane transporter activity	0	1	1	1	0.0537807	0.260367	-	gene-GTA08_BOTSDO13953(GTA08_BOTSDO13953)
GO:0015517	MF	galactose:proton symporter activity	0	1	1	1	0.0537807	0.260367	-	gene-GTA08_BOTSDO13953(GTA08_BOTSDO13953)
GO:0015518	MF	arabinose:proton symporter activity	0	1	1	1	0.0537807	0.260367	-	gene-GTA08_BOTSDO13953(GTA08_BOTSDO13953)
GO:0015535	MF	fucose:proton symporter activity	0	1	1	1	0.0537807	0.260367	-	gene-GTA08_BOTSDO13953(GTA08_BOTSDO13953)
GO:0017168	MF	5-oxoprolinase (ATP-hydrolyzing) activity	0	1	1	1	0.0537807	0.260367	-	gene-GTA08_BOTSDO04401(GTA08_BOTSDO04401)
GO:0042900	MF	arabinose transmembrane transporter activity	0	1	1	1	0.0537807	0.260367	-	gene-GTA08_BOTSDO13953(GTA08_BOTSDO13953)
GO:0045548	MF	phenylalanine ammonia-lyase activity	0	1	1	1	0.0537807	0.260367	-	gene-GTA08_BOTSDO00716(GTA08_BOTSDO00716)
GO:0050440	MF	2-methylcitrate synthase activity	0	1	1	1	0.0537807	0.260367	-	gene-GTA08_BOTSDO07597(GTA08_BOTSDO07597)
GO:0003995	MF	acyl-CoA dehydrogenase activity	0	3	3	17	0.0598515	0.280483	-	gene-GTA08_BOTSDO05316(GTA08_BOTSDO05316);gene-GTA08_BOTSDO08030(GTA08_BOTSDO08030);gene-GTA08_BOTSDO08031(GTA08_BOTSDO08031)
GO:0030247	MF	polysaccharide binding	0	3	3	17	0.0598515	0.280483	-	gene-GTA08_BOTSDO02133(GTA08_BOTSDO02133);gene-GTA08_BOTSDO05417(GTA08_BOTSDO05417);gene-GTA08_BOTSDO08820(GTA08_BOTSDO08820)
GO:0016702	MF	oxidoreductase activity, acting on single donors with incorporation of molecular oxygen, incorporation of two atoms of oxygen	1	3	4	28	0.0606948	0.280483	gene-GTA08_BOTSDO13211(GTA08_BOTSDO13211)	gene-GTA08_BOTSDO05765(GTA08_BOTSDO05765);gene-GTA08_BOTSDO06534(GTA08_BOTSDO06534);gene-GTA08_BOTSDO13710(GTA08_BOTSDO13710)
GO:0016801	MF	hydrolase activity, acting on ether bonds	1	1	2	8	0.0651152	0.29642	gene-GTA08_BOTSDO05276(GTA08_BOTSDO05276)	gene-GTA08_BOTSDO05149(GTA08_BOTSDO05149)
GO:0004601	MF	peroxidase activity	3	2	5	41	0.0669801	0.300425	gene-GTA08_BOTSDO05830(GTA08_BOTSDO05830);gene-GTA08_BOTSDO09581(GTA08_BOTSDO09581);gene-GTA08_BOTSDO13964(GTA08_BOTSDO13964)	gene-GTA08_BOTSDO02767(GTA08_BOTSDO02767);gene-GTA08_BOTSDO12189(GTA08_BOTSDO12189)
GO:0071949	MF	FAD binding	3	4	7	69	0.076018	0.336022	gene-GTA08_BOTSDO03718(GTA08_BOTSDO03718);gene-GTA08_BOTSDO05421(GTA08_BOTSDO05421);gene-GTA08_BOTSDO11079(GTA08_BOTSDO11079)	gene-GTA08_BOTSDO02647(GTA08_BOTSDO02647);gene-GTA08_BOTSDO08030(GTA08_BOTSDO08030);gene-GTA08_BOTSDO08031(GTA08_BOTSDO08031);gene-GTA08_BOTSDO11689(GTA08_BOTSDO11689)
GO:0016638	MF	oxidoreductase activity, acting on the CH-NH2 group of donors	0	3	3	19	0.078872	0.343657	-	gene-GTA08_BOTSDO01717(GTA08_BOTSDO01717);gene-GTA08_BOTSDO09755(GTA08_BOTSDO09755);gene-GTA08_BOTSDO10310(GTA08_BOTSDO10310)
GO:0000287	MF	magnesium ion binding	3	3	6	57	0.0840624	0.360194	gene-GTA08_BOTSDO00584(GTA08_BOTSDO00584);gene-GTA08_BOTSDO07016(GTA08_BOTSDO07016);gene-GTA08_BOTSDO11135(GTA08_BOTSDO11135)	gene-GTA08_BOTSDO01818(GTA08_BOTSDO01818);gene-GTA08_BOTSDO11445(GTA08_BOTSDO11445);gene-GTA08_BOTSDO13890(GTA08_BOTSDO13890)
GO:0016831	MF	carboxy-lyase activity	1	3	4	32	0.0903813	0.360194	gene-GTA08_BOTSDO07016(GTA08_BOTSDO07016)	gene-GTA08_BOTSDO02847(GTA08_BOTSDO02847);gene-GTA08_BOTSDO08782(GTA08_BOTSDO08782);gene-GTA08_BOTSDO13890(GTA08_BOTSDO13890)
GO:0008061	MF	chitin binding	2	0	2	10	0.0975359	0.360194	gene-GTA08_BOTSDO03987(GTA08_BOTSDO03987);gene-GTA08_BOTSDO04104(GTA08_BOTSDO04104)	-
GO:0070403	MF	NAD+ binding	2	0	2	10	0.0975359	0.360194	gene-GTA08_BOTSDO06148(GTA08_BOTSDO06148);gene-GTA08_BOTSDO10351(GTA08_BOTSDO10351)	-
GO:0004108	MF	citrate (Si)-synthase activity	0	1	1	2	0.104677	0.360194	-	gene-GTA08_BOTSDO07597(GTA08_BOTSDO07597)
GO:0004139	MF	deoxyribose-phosphate aldolase activity	0	1	1	2	0.104677	0.360194	-	gene-GTA08_BOTSDO02221(GTA08_BOTSDO02221)
GO:0004160	MF	dihydroxy-acid dehydratase activity	0	1	1	2	0.104677	0.360194	-	gene-GTA08_BOTSDO11714(GTA08_BOTSDO11714)
GO:0004370	MF	glycerol kinase activity	0	1	1	2	0.104677	0.360194	-	gene-GTA08_BOTSDO13610(GTA08_BOTSDO13610)
GO:0004399	MF	histidinol dehydrogenase activity	0	1	1	2	0.104677	0.360194	-	gene-GTA08_BOTSDO04126(GTA08_BOTSDO04126)
GO:0004411	MF	homogentisate 1,2-dioxygenase activity	0	1	1	2	0.104677	0.360194	-	gene-GTA08_BOTSDO06534(GTA08_BOTSDO06534)
GO:0004421	MF	hydroxymethylglutaryl-CoA synthase activity	1	0	1	2	0.104677	0.360194	gene-GTA08_BOTSDO01186(GTA08_BOTSDO01186)	-
GO:0004452	MF	isopentenyl-diphosphate delta-isomerase activity	1	0	1	2	0.104677	0.360194	gene-GTA08_BOTSDO01182(GTA08_BOTSDO01182)	-
GO:0004617	MF	phosphoglycerate dehydrogenase activity	0	1	1	2	0.104677	0.360194	-	gene-GTA08_BOTSDO11986(GTA08_BOTSDO11986)
GO:0008553	MF	proton-exporting ATPase activity, phosphorylative mechanism	0	1	1	2	0.104677	0.360194	-	gene-GTA08_BOTSDO00110(GTA08_BOTSDO00110)
GO:0015556	MF	C4-dicarboxylate transmembrane transporter activity	1	0	1	2	0.104677	0.360194	gene-GTA08_BOTSDO04858(GTA08_BOTSDO04858)	-
GO:0016682	MF	oxidoreductase activity, acting on diphenols and related substances as donors, oxygen as acceptor	1	0	1	2	0.104677	0.360194	gene-GTA08_BOTSDO10674(GTA08_BOTSDO10674)	-
GO:0016841	MF	ammonia-lyase activity	0	1	1	2	0.104677	0.360194	-	gene-GTA08_BOTSDO00716(GTA08_BOTSDO00716)
GO:0036440	MF	citrate synthase activity	0	1	1	2	0.104677	0.360194	-	gene-GTA08_BOTSDO07597(GTA08_BOTSDO07597)
GO:0016829	MF	lyase activity	4	11	15	196	0.105106	0.360194	gene-GTA08_BOTSDO00409(GTA08_BOTSDO00409);gene-GTA08_BOTSDO00584(GTA08_BOTSDO00584);gene-GTA08_BOTSDO01290(GTA08_BOTSDO01290);gene-GTA08_BOTSDO07016(GTA08_BOTSDO07016)	gene-GTA08_BOTSDO00716(GTA08_BOTSDO00716);gene-GTA08_BOTSDO02221(GTA08_BOTSDO02221);gene-GTA08_BOTSDO02847(GTA08_BOTSDO02847);gene-GTA08_BOTSDO04004(GTA08_BOTSDO04004);gene-GTA08_BOTSDO08460(GTA08_BOTSDO08460);gene-GTA08_BOTSDO08782(GTA08_BOTSDO08782);gene-GTA08_BOTSDO11609(GTA08_BOTSDO11609);gene-GTA08_BOTSDO11714(GTA08_BOTSDO11714);gene-GTA08_BOTSDO12904(GTA08_BOTSDO12904);gene-GTA08_BOTSDO1389…
GO:0016830	MF	carbon-carbon lyase activity	1	4	5	48	0.113605	0.38164	gene-GTA08_BOTSDO07016(GTA08_BOTSDO07016)	gene-GTA08_BOTSDO02221(GTA08_BOTSDO02221);gene-GTA08_BOTSDO02847(GTA08_BOTSDO02847);gene-GTA08_BOTSDO08782(GTA08_BOTSDO08782);gene-GTA08_BOTSDO13890(GTA08_BOTSDO13890)
GO:0046912	MF	transferase activity, transferring acyl groups, acyl groups converted into alkyl on transfer	1	1	2	11	0.115118	0.38164	gene-GTA08_BOTSDO01186(GTA08_BOTSDO01186)	gene-GTA08_BOTSDO07597(GTA08_BOTSDO07597)
GO:0051920	MF	peroxiredoxin activity	0	2	2	11	0.115118	0.38164	-	gene-GTA08_BOTSDO01875(GTA08_BOTSDO01875);gene-GTA08_BOTSDO01877(GTA08_BOTSDO01877)
GO:0051287	MF	NAD binding	2	4	6	65	0.135177	0.440592	gene-GTA08_BOTSDO06148(GTA08_BOTSDO06148);gene-GTA08_BOTSDO10351(GTA08_BOTSDO10351)	gene-GTA08_BOTSDO02849(GTA08_BOTSDO02849);gene-GTA08_BOTSDO04126(GTA08_BOTSDO04126);gene-GTA08_BOTSDO04889(GTA08_BOTSDO04889);gene-GTA08_BOTSDO11986(GTA08_BOTSDO11986)
GO:0016846	MF	carbon-sulfur lyase activity	0	3	3	24	0.135789	0.440592	-	gene-GTA08_BOTSDO04004(GTA08_BOTSDO04004);gene-GTA08_BOTSDO11609(GTA08_BOTSDO11609);gene-GTA08_BOTSDO12904(GTA08_BOTSDO12904)
GO:0004499	MF	N,N-dimethylaniline monooxygenase activity	0	3	3	25	0.148513	0.452596	-	gene-GTA08_BOTSDO00783(GTA08_BOTSDO00783);gene-GTA08_BOTSDO05861(GTA08_BOTSDO05861);gene-GTA08_BOTSDO06395(GTA08_BOTSDO06395)
GO:0008081	MF	phosphoric diester hydrolase activity	3	0	3	25	0.148513	0.452596	gene-GTA08_BOTSDO05268(GTA08_BOTSDO05268);gene-GTA08_BOTSDO05964(GTA08_BOTSDO05964);gene-GTA08_BOTSDO12331(GTA08_BOTSDO12331)	-
GO:0003979	MF	UDP-glucose 6-dehydrogenase activity	0	1	1	3	0.152844	0.452596	-	gene-GTA08_BOTSDO02849(GTA08_BOTSDO02849)
GO:0004414	MF	homoserine O-acetyltransferase activity	0	1	1	3	0.152844	0.452596	-	gene-GTA08_BOTSDO02900(GTA08_BOTSDO02900)
GO:0004565	MF	beta-galactosidase activity	0	1	1	3	0.152844	0.452596	-	gene-GTA08_BOTSDO05341(GTA08_BOTSDO05341)
GO:0008452	MF	RNA ligase activity	1	0	1	3	0.152844	0.452596	gene-GTA08_BOTSDO05153(GTA08_BOTSDO05153)	-
GO:0015145	MF	monosaccharide transmembrane transporter activity	0	1	1	3	0.152844	0.452596	-	gene-GTA08_BOTSDO13953(GTA08_BOTSDO13953)
GO:0015149	MF	hexose transmembrane transporter activity	0	1	1	3	0.152844	0.452596	-	gene-GTA08_BOTSDO13953(GTA08_BOTSDO13953)
GO:0051119	MF	sugar transmembrane transporter activity	0	1	1	3	0.152844	0.452596	-	gene-GTA08_BOTSDO13953(GTA08_BOTSDO13953)
GO:0016810	MF	hydrolase activity, acting on carbon-nitrogen (but not peptide) bonds	2	6	8	98	0.155882	0.454694	gene-GTA08_BOTSDO09639(GTA08_BOTSDO09639);gene-GTA08_BOTSDO12252(GTA08_BOTSDO12252)	gene-GTA08_BOTSDO00350(GTA08_BOTSDO00350);gene-GTA08_BOTSDO02647(GTA08_BOTSDO02647);gene-GTA08_BOTSDO04401(GTA08_BOTSDO04401);gene-GTA08_BOTSDO05274(GTA08_BOTSDO05274);gene-GTA08_BOTSDO05670(GTA08_BOTSDO05670);gene-GTA08_BOTSDO11171(GTA08_BOTSDO11171)
GO:0016746	MF	transferase activity, transferring acyl groups	7	5	12	161	0.156534	0.454694	gene-GTA08_BOTSDO01186(GTA08_BOTSDO01186);gene-GTA08_BOTSDO01194(GTA08_BOTSDO01194);gene-GTA08_BOTSDO01276(GTA08_BOTSDO01276);gene-GTA08_BOTSDO05276(GTA08_BOTSDO05276);gene-GTA08_BOTSDO11589(GTA08_BOTSDO11589);gene-GTA08_BOTSDO12080(GTA08_BOTSDO12080);gene-GTA08_BOTSDO13838(GTA08_BOTSDO13838)	gene-GTA08_BOTSDO02900(GTA08_BOTSDO02900);gene-GTA08_BOTSDO05070(GTA08_BOTSDO05070);gene-GTA08_BOTSDO07597(GTA08_BOTSDO07597);gene-GTA08_BOTSDO09035(GTA08_BOTSDO09035);gene-GTA08_BOTSDO13467(GTA08_BOTSDO13467)
GO:0015079	MF	potassium ion transmembrane transporter activity	0	2	2	14	0.171698	0.494035	-	gene-GTA08_BOTSDO00662(GTA08_BOTSDO00662);gene-GTA08_BOTSDO10310(GTA08_BOTSDO10310)
GO:0016701	MF	oxidoreductase activity, acting on single donors with incorporation of molecular oxygen	1	3	4	41	0.176627	0.503471	gene-GTA08_BOTSDO13211(GTA08_BOTSDO13211)	gene-GTA08_BOTSDO05765(GTA08_BOTSDO05765);gene-GTA08_BOTSDO06534(GTA08_BOTSDO06534);gene-GTA08_BOTSDO13710(GTA08_BOTSDO13710)
GO:0016765	MF	transferase activity, transferring alkyl or aryl (other than methyl) groups	3	1	4	42	0.187552	0.512882	gene-GTA08_BOTSDO01193(GTA08_BOTSDO01193);gene-GTA08_BOTSDO09576(GTA08_BOTSDO09576);gene-GTA08_BOTSDO09620(GTA08_BOTSDO09620)	gene-GTA08_BOTSDO04036(GTA08_BOTSDO04036)
GO:0004185	MF	serine-type carboxypeptidase activity	1	1	2	15	0.191447	0.512882	gene-GTA08_BOTSDO08711(GTA08_BOTSDO08711)	gene-GTA08_BOTSDO09127(GTA08_BOTSDO09127)
GO:0070008	MF	serine-type exopeptidase activity	1	1	2	15	0.191447	0.512882	gene-GTA08_BOTSDO08711(GTA08_BOTSDO08711)	gene-GTA08_BOTSDO09127(GTA08_BOTSDO09127)
GO:0005267	MF	potassium channel activity	0	1	1	4	0.198426	0.512882	-	gene-GTA08_BOTSDO10310(GTA08_BOTSDO10310)
GO:0005310	MF	dicarboxylic acid transmembrane transporter activity	1	0	1	4	0.198426	0.512882	gene-GTA08_BOTSDO04858(GTA08_BOTSDO04858)	-
GO:0005351	MF	carbohydrate:proton symporter activity	0	1	1	4	0.198426	0.512882	-	gene-GTA08_BOTSDO13953(GTA08_BOTSDO13953)
GO:0005402	MF	carbohydrate:cation symporter activity	0	1	1	4	0.198426	0.512882	-	gene-GTA08_BOTSDO13953(GTA08_BOTSDO13953)
GO:0008776	MF	acetate kinase activity	1	0	1	4	0.198426	0.512882	gene-GTA08_BOTSDO11135(GTA08_BOTSDO11135)	-
GO:0015144	MF	carbohydrate transmembrane transporter activity	0	1	1	4	0.198426	0.512882	-	gene-GTA08_BOTSDO13953(GTA08_BOTSDO13953)
GO:0018576	MF	catechol 1,2-dioxygenase activity	0	1	1	4	0.198426	0.512882	-	gene-GTA08_BOTSDO05765(GTA08_BOTSDO05765)
GO:0019114	MF	catechol dioxygenase activity	0	1	1	4	0.198426	0.512882	-	gene-GTA08_BOTSDO05765(GTA08_BOTSDO05765)
GO:0050661	MF	NADP binding	0	4	4	44	0.210017	0.537493	-	gene-GTA08_BOTSDO00783(GTA08_BOTSDO00783);gene-GTA08_BOTSDO03886(GTA08_BOTSDO03886);gene-GTA08_BOTSDO05861(GTA08_BOTSDO05861);gene-GTA08_BOTSDO06395(GTA08_BOTSDO06395)
GO:0016298	MF	lipase activity	1	1	2	16	0.211473	0.537493	gene-GTA08_BOTSDO14098(GTA08_BOTSDO14098)	gene-GTA08_BOTSDO00332(GTA08_BOTSDO00332)
GO:0015925	MF	galactosidase activity	0	2	2	17	0.231689	0.553961	-	gene-GTA08_BOTSDO02303(GTA08_BOTSDO02303);gene-GTA08_BOTSDO05341(GTA08_BOTSDO05341)
GO:0000104	MF	succinate dehydrogenase activity	1	0	1	5	0.241563	0.553961	gene-GTA08_BOTSDO13426(GTA08_BOTSDO13426)	-
GO:0004069	MF	L-aspartate:2-oxoglutarate aminotransferase activity	1	0	1	5	0.241563	0.553961	gene-GTA08_BOTSDO02628(GTA08_BOTSDO02628)	-
GO:0004075	MF	biotin carboxylase activity	0	1	1	5	0.241563	0.553961	-	gene-GTA08_BOTSDO12276(GTA08_BOTSDO12276)
GO:0004096	MF	catalase activity	0	1	1	5	0.241563	0.553961	-	gene-GTA08_BOTSDO12189(GTA08_BOTSDO12189)
GO:0004652	MF	polynucleotide adenylyltransferase activity	0	1	1	5	0.241563	0.553961	-	gene-GTA08_BOTSDO11445(GTA08_BOTSDO11445)
GO:0004806	MF	triglyceride lipase activity	0	1	1	5	0.241563	0.553961	-	gene-GTA08_BOTSDO00332(GTA08_BOTSDO00332)
GO:0004888	MF	transmembrane signaling receptor activity	0	1	1	5	0.241563	0.553961	-	gene-GTA08_BOTSDO04606(GTA08_BOTSDO04606)
GO:0008793	MF	aromatic-amino-acid:2-oxoglutarate aminotransferase activity	1	0	1	5	0.241563	0.553961	gene-GTA08_BOTSDO02628(GTA08_BOTSDO02628)	-
GO:0016413	MF	O-acetyltransferase activity	0	1	1	5	0.241563	0.553961	-	gene-GTA08_BOTSDO02900(GTA08_BOTSDO02900)
GO:0016863	MF	intramolecular oxidoreductase activity, transposing C=C bonds	1	0	1	5	0.241563	0.553961	gene-GTA08_BOTSDO01182(GTA08_BOTSDO01182)	-
GO:0070546	MF	L-phenylalanine aminotransferase activity	1	0	1	5	0.241563	0.553961	gene-GTA08_BOTSDO02628(GTA08_BOTSDO02628)	-
GO:0080130	MF	L-phenylalanine:2-oxoglutarate aminotransferase activity	1	0	1	5	0.241563	0.553961	gene-GTA08_BOTSDO02628(GTA08_BOTSDO02628)	-
GO:0016628	MF	oxidoreductase activity, acting on the CH-CH group of donors, NAD or NADP as acceptor	0	2	2	19	0.272387	0.610833	-	gene-GTA08_BOTSDO02849(GTA08_BOTSDO02849);gene-GTA08_BOTSDO04836(GTA08_BOTSDO04836)
GO:0010181	MF	FMN binding	1	3	4	50	0.281177	0.610833	gene-GTA08_BOTSDO00398(GTA08_BOTSDO00398)	gene-GTA08_BOTSDO07439(GTA08_BOTSDO07439);gene-GTA08_BOTSDO07677(GTA08_BOTSDO07677);gene-GTA08_BOTSDO07678(GTA08_BOTSDO07678)
GO:0004622	MF	lysophospholipase activity	1	0	1	6	0.282385	0.610833	gene-GTA08_BOTSDO14098(GTA08_BOTSDO14098)	-
GO:0004657	MF	proline dehydrogenase activity	0	1	1	6	0.282385	0.610833	-	gene-GTA08_BOTSDO11859(GTA08_BOTSDO11859)
GO:0016624	MF	oxidoreductase activity, acting on the aldehyde or oxo group of donors, disulfide as acceptor	0	1	1	6	0.282385	0.610833	-	gene-GTA08_BOTSDO01909(GTA08_BOTSDO01909)
GO:0016840	MF	carbon-nitrogen lyase activity	0	1	1	6	0.282385	0.610833	-	gene-GTA08_BOTSDO00716(GTA08_BOTSDO00716)
GO:0031176	MF	endo-1,4-beta-xylanase activity	0	1	1	6	0.282385	0.610833	-	gene-GTA08_BOTSDO02133(GTA08_BOTSDO02133)
GO:0038023	MF	signaling receptor activity	0	1	1	6	0.282385	0.610833	-	gene-GTA08_BOTSDO04606(GTA08_BOTSDO04606)
GO:0016709	MF	oxidoreductase activity, acting on paired donors, with incorporation or reduction of molecular oxygen, NAD(P)H as one donor, and incorporation of one atom of oxygen	0	3	3	35	0.290413	0.623774	-	gene-GTA08_BOTSDO00783(GTA08_BOTSDO00783);gene-GTA08_BOTSDO05861(GTA08_BOTSDO05861);gene-GTA08_BOTSDO06395(GTA08_BOTSDO06395)
GO:0004222	MF	metalloendopeptidase activity	0	2	2	20	0.292736	0.624367	-	gene-GTA08_BOTSDO01758(GTA08_BOTSDO01758);gene-GTA08_BOTSDO08012(GTA08_BOTSDO08012)
GO:0016884	MF	carbon-nitrogen ligase activity, with glutamine as amido-N-donor	1	2	3	36	0.305384	0.635779	gene-GTA08_BOTSDO13615(GTA08_BOTSDO13615)	gene-GTA08_BOTSDO00771(GTA08_BOTSDO00771);gene-GTA08_BOTSDO11607(GTA08_BOTSDO11607)
GO:0004061	MF	arylformamidase activity	0	1	1	7	0.321016	0.635779	-	gene-GTA08_BOTSDO05670(GTA08_BOTSDO05670)
GO:0004364	MF	glutathione transferase activity	0	1	1	7	0.321016	0.635779	-	gene-GTA08_BOTSDO04036(GTA08_BOTSDO04036)
GO:0004396	MF	hexokinase activity	1	0	1	7	0.321016	0.635779	gene-GTA08_BOTSDO04463(GTA08_BOTSDO04463)	-
GO:0004523	MF	RNA-DNA hybrid ribonuclease activity	0	1	1	7	0.321016	0.635779	-	gene-GTA08_BOTSDO04125(GTA08_BOTSDO04125)
GO:0005536	MF	glucose binding	1	0	1	7	0.321016	0.635779	gene-GTA08_BOTSDO04463(GTA08_BOTSDO04463)	-
GO:0015662	MF	ion transmembrane transporter activity, phosphorylative mechanism	0	1	1	7	0.321016	0.635779	-	gene-GTA08_BOTSDO00110(GTA08_BOTSDO00110)
GO:0016812	MF	hydrolase activity, acting on carbon-nitrogen (but not peptide) bonds, in cyclic amides	0	1	1	7	0.321016	0.635779	-	gene-GTA08_BOTSDO04401(GTA08_BOTSDO04401)
GO:0016838	MF	carbon-oxygen lyase activity, acting on phosphates	1	0	1	7	0.321016	0.635779	gene-GTA08_BOTSDO00584(GTA08_BOTSDO00584)	-
GO:0060089	MF	molecular transducer activity	0	1	1	7	0.321016	0.635779	-	gene-GTA08_BOTSDO04606(GTA08_BOTSDO04606)
GO:0097599	MF	xylanase activity	0	1	1	7	0.321016	0.635779	-	gene-GTA08_BOTSDO02133(GTA08_BOTSDO02133)
GO:0016407	MF	acetyltransferase activity	3	2	5	70	0.323632	0.636825	gene-GTA08_BOTSDO01276(GTA08_BOTSDO01276);gene-GTA08_BOTSDO11589(GTA08_BOTSDO11589);gene-GTA08_BOTSDO12080(GTA08_BOTSDO12080)	gene-GTA08_BOTSDO02900(GTA08_BOTSDO02900);gene-GTA08_BOTSDO09035(GTA08_BOTSDO09035)
GO:0016614	MF	oxidoreductase activity, acting on CH-OH group of donors	3	9	12	194	0.350336	0.665	gene-GTA08_BOTSDO04104(GTA08_BOTSDO04104);gene-GTA08_BOTSDO04504(GTA08_BOTSDO04504);gene-GTA08_BOTSDO13637(GTA08_BOTSDO13637)	gene-GTA08_BOTSDO00341(GTA08_BOTSDO00341);gene-GTA08_BOTSDO02849(GTA08_BOTSDO02849);gene-GTA08_BOTSDO04126(GTA08_BOTSDO04126);gene-GTA08_BOTSDO04526(GTA08_BOTSDO04526);gene-GTA08_BOTSDO04889(GTA08_BOTSDO04889);gene-GTA08_BOTSDO05511(GTA08_BOTSDO05511);gene-GTA08_BOTSDO06896(GTA08_BOTSDO06896);gene-GTA08_BOTSDO11986(GTA08_BOTSDO11986);gene-GTA08_BOTSDO13523(GTA08_BOTSDO13523)
GO:0000978	MF	RNA polymerase II cis-regulatory region sequence-specific DNA binding	1	0	1	8	0.357574	0.665	gene-GTA08_BOTSDO00957(GTA08_BOTSDO00957)	-
GO:0000987	MF	cis-regulatory region sequence-specific DNA binding	1	0	1	8	0.357574	0.665	gene-GTA08_BOTSDO00957(GTA08_BOTSDO00957)	-
GO:0004560	MF	alpha-L-fucosidase activity	0	1	1	8	0.357574	0.665	-	gene-GTA08_BOTSDO03710(GTA08_BOTSDO03710)
GO:0015295	MF	solute:proton symporter activity	0	1	1	8	0.357574	0.665	-	gene-GTA08_BOTSDO13953(GTA08_BOTSDO13953)
GO:0015928	MF	fucosidase activity	0	1	1	8	0.357574	0.665	-	gene-GTA08_BOTSDO03710(GTA08_BOTSDO03710)
GO:0016679	MF	oxidoreductase activity, acting on diphenols and related substances as donors	1	0	1	8	0.357574	0.665	gene-GTA08_BOTSDO10674(GTA08_BOTSDO10674)	-
GO:0016774	MF	phosphotransferase activity, carboxyl group as acceptor	1	0	1	8	0.357574	0.665	gene-GTA08_BOTSDO11135(GTA08_BOTSDO11135)	-
GO:0016813	MF	hydrolase activity, acting on carbon-nitrogen (but not peptide) bonds, in linear amidines	0	1	1	8	0.357574	0.665	-	gene-GTA08_BOTSDO00350(GTA08_BOTSDO00350)
GO:0000976	MF	transcription regulatory region sequence-specific DNA binding	1	0	1	9	0.392168	0.695415	gene-GTA08_BOTSDO00957(GTA08_BOTSDO00957)	-
GO:0000977	MF	RNA polymerase II transcription regulatory region sequence-specific DNA binding	1	0	1	9	0.392168	0.695415	gene-GTA08_BOTSDO00957(GTA08_BOTSDO00957)	-
GO:0015293	MF	symporter activity	0	1	1	9	0.392168	0.695415	-	gene-GTA08_BOTSDO13953(GTA08_BOTSDO13953)
GO:0015294	MF	solute:cation symporter activity	0	1	1	9	0.392168	0.695415	-	gene-GTA08_BOTSDO13953(GTA08_BOTSDO13953)
GO:0016886	MF	ligase activity, forming phosphoric ester bonds	1	0	1	9	0.392168	0.695415	gene-GTA08_BOTSDO05153(GTA08_BOTSDO05153)	-
GO:0048029	MF	monosaccharide binding	1	0	1	9	0.392168	0.695415	gene-GTA08_BOTSDO04463(GTA08_BOTSDO04463)	-
GO:0052692	MF	raffinose alpha-galactosidase activity	0	1	1	9	0.392168	0.695415	-	gene-GTA08_BOTSDO02303(GTA08_BOTSDO02303)
GO:0070566	MF	adenylyltransferase activity	0	1	1	9	0.392168	0.695415	-	gene-GTA08_BOTSDO11445(GTA08_BOTSDO11445)
GO:0046872	MF	metal ion binding	28	41	69	1246	0.412533	0.727299	gene-GTA08_BOTSDO00584(GTA08_BOTSDO00584);gene-GTA08_BOTSDO00957(GTA08_BOTSDO00957);gene-GTA08_BOTSDO01396(GTA08_BOTSDO01396);gene-GTA08_BOTSDO01755(GTA08_BOTSDO01755);gene-GTA08_BOTSDO02023(GTA08_BOTSDO02023);gene-GTA08_BOTSDO02974(GTA08_BOTSDO02974);gene-GTA08_BOTSDO03608(GTA08_BOTSDO03608);gene-GTA08_BOTSDO05313(GTA08_BOTSDO05313);gene-GTA08_BOTSDO05830(GTA08_BOTSDO05830);gene-GTA08_BOTSDO0644…	gene-GTA08_BOTSDO00110(GTA08_BOTSDO00110);gene-GTA08_BOTSDO00350(GTA08_BOTSDO00350);gene-GTA08_BOTSDO00371(GTA08_BOTSDO00371);gene-GTA08_BOTSDO00382(GTA08_BOTSDO00382);gene-GTA08_BOTSDO00477(GTA08_BOTSDO00477);gene-GTA08_BOTSDO00738(GTA08_BOTSDO00738);gene-GTA08_BOTSDO01663(GTA08_BOTSDO01663);gene-GTA08_BOTSDO01670(GTA08_BOTSDO01670);gene-GTA08_BOTSDO01717(GTA08_BOTSDO01717);gene-GTA08_BOTSDO0173…
GO:0001067	MF	regulatory region nucleic acid binding	1	0	1	10	0.424905	0.728068	gene-GTA08_BOTSDO00957(GTA08_BOTSDO00957)	-
GO:0004557	MF	alpha-galactosidase activity	0	1	1	10	0.424905	0.728068	-	gene-GTA08_BOTSDO02303(GTA08_BOTSDO02303)
GO:0008810	MF	cellulase activity	0	1	1	10	0.424905	0.728068	-	gene-GTA08_BOTSDO08820(GTA08_BOTSDO08820)
GO:0016832	MF	aldehyde-lyase activity	0	1	1	10	0.424905	0.728068	-	gene-GTA08_BOTSDO02221(GTA08_BOTSDO02221)
GO:0045735	MF	nutrient reservoir activity	0	1	1	10	0.424905	0.728068	-	gene-GTA08_BOTSDO04745(GTA08_BOTSDO04745)
GO:0043169	MF	cation binding	28	41	69	1255	0.43923	0.748408	gene-GTA08_BOTSDO00584(GTA08_BOTSDO00584);gene-GTA08_BOTSDO00957(GTA08_BOTSDO00957);gene-GTA08_BOTSDO01396(GTA08_BOTSDO01396);gene-GTA08_BOTSDO01755(GTA08_BOTSDO01755);gene-GTA08_BOTSDO02023(GTA08_BOTSDO02023);gene-GTA08_BOTSDO02974(GTA08_BOTSDO02974);gene-GTA08_BOTSDO03608(GTA08_BOTSDO03608);gene-GTA08_BOTSDO05313(GTA08_BOTSDO05313);gene-GTA08_BOTSDO05830(GTA08_BOTSDO05830);gene-GTA08_BOTSDO0644…	gene-GTA08_BOTSDO00110(GTA08_BOTSDO00110);gene-GTA08_BOTSDO00350(GTA08_BOTSDO00350);gene-GTA08_BOTSDO00371(GTA08_BOTSDO00371);gene-GTA08_BOTSDO00382(GTA08_BOTSDO00382);gene-GTA08_BOTSDO00477(GTA08_BOTSDO00477);gene-GTA08_BOTSDO00738(GTA08_BOTSDO00738);gene-GTA08_BOTSDO01663(GTA08_BOTSDO01663);gene-GTA08_BOTSDO01670(GTA08_BOTSDO01670);gene-GTA08_BOTSDO01717(GTA08_BOTSDO01717);gene-GTA08_BOTSDO0173…
GO:0016879	MF	ligase activity, forming carbon-nitrogen bonds	1	3	4	63	0.44177	0.748555	gene-GTA08_BOTSDO13615(GTA08_BOTSDO13615)	gene-GTA08_BOTSDO00771(GTA08_BOTSDO00771);gene-GTA08_BOTSDO11607(GTA08_BOTSDO11607);gene-GTA08_BOTSDO12276(GTA08_BOTSDO12276)
GO:0016747	MF	transferase activity, transferring acyl groups other than amino-acyl groups	5	2	7	118	0.451073	0.751592	gene-GTA08_BOTSDO01194(GTA08_BOTSDO01194);gene-GTA08_BOTSDO01276(GTA08_BOTSDO01276);gene-GTA08_BOTSDO11589(GTA08_BOTSDO11589);gene-GTA08_BOTSDO12080(GTA08_BOTSDO12080);gene-GTA08_BOTSDO13838(GTA08_BOTSDO13838)	gene-GTA08_BOTSDO02900(GTA08_BOTSDO02900);gene-GTA08_BOTSDO09035(GTA08_BOTSDO09035)
GO:0016788	MF	hydrolase activity, acting on ester bonds	7	8	15	264	0.45144	0.751592	gene-GTA08_BOTSDO00377(GTA08_BOTSDO00377);gene-GTA08_BOTSDO03712(GTA08_BOTSDO03712);gene-GTA08_BOTSDO05268(GTA08_BOTSDO05268);gene-GTA08_BOTSDO05964(GTA08_BOTSDO05964);gene-GTA08_BOTSDO07350(GTA08_BOTSDO07350);gene-GTA08_BOTSDO12331(GTA08_BOTSDO12331);gene-GTA08_BOTSDO14098(GTA08_BOTSDO14098)	gene-GTA08_BOTSDO00332(GTA08_BOTSDO00332);gene-GTA08_BOTSDO02033(GTA08_BOTSDO02033);gene-GTA08_BOTSDO03896(GTA08_BOTSDO03896);gene-GTA08_BOTSDO04005(GTA08_BOTSDO04005);gene-GTA08_BOTSDO04125(GTA08_BOTSDO04125);gene-GTA08_BOTSDO05896(GTA08_BOTSDO05896);gene-GTA08_BOTSDO07451(GTA08_BOTSDO07451);gene-GTA08_BOTSDO10643(GTA08_BOTSDO10643)
GO:0052689	MF	carboxylic ester hydrolase activity	2	1	3	46	0.453256	0.751592	gene-GTA08_BOTSDO07350(GTA08_BOTSDO07350);gene-GTA08_BOTSDO14098(GTA08_BOTSDO14098)	gene-GTA08_BOTSDO00332(GTA08_BOTSDO00332)
GO:0004620	MF	phospholipase activity	1	0	1	11	0.455884	0.751592	gene-GTA08_BOTSDO14098(GTA08_BOTSDO14098)	-
GO:0102483	MF	scopolin beta-glucosidase activity	1	0	1	11	0.455884	0.751592	gene-GTA08_BOTSDO10386(GTA08_BOTSDO10386)	-
GO:0046873	MF	metal ion transmembrane transporter activity	1	3	4	65	0.465912	0.763996	gene-GTA08_BOTSDO03968(GTA08_BOTSDO03968)	gene-GTA08_BOTSDO00662(GTA08_BOTSDO00662);gene-GTA08_BOTSDO05395(GTA08_BOTSDO05395);gene-GTA08_BOTSDO10310(GTA08_BOTSDO10310)
GO:0004616	MF	phosphogluconate dehydrogenase (decarboxylating) activity	0	1	1	12	0.485199	0.787304	-	gene-GTA08_BOTSDO04889(GTA08_BOTSDO04889)
GO:0004180	MF	carboxypeptidase activity	1	1	2	30	0.485289	0.787304	gene-GTA08_BOTSDO08711(GTA08_BOTSDO08711)	gene-GTA08_BOTSDO09127(GTA08_BOTSDO09127)
GO:0019200	MF	carbohydrate kinase activity	1	0	1	13	0.512938	0.827758	gene-GTA08_BOTSDO04463(GTA08_BOTSDO04463)	-
GO:0004519	MF	endonuclease activity	0	3	3	51	0.522489	0.838732	-	gene-GTA08_BOTSDO02033(GTA08_BOTSDO02033);gene-GTA08_BOTSDO04125(GTA08_BOTSDO04125);gene-GTA08_BOTSDO10643(GTA08_BOTSDO10643)
GO:0008199	MF	ferric iron binding	0	1	1	14	0.539188	0.852084	-	gene-GTA08_BOTSDO05765(GTA08_BOTSDO05765)
GO:0008374	MF	O-acyltransferase activity	0	1	1	14	0.539188	0.852084	-	gene-GTA08_BOTSDO02900(GTA08_BOTSDO02900)
GO:0008422	MF	beta-glucosidase activity	1	0	1	14	0.539188	0.852084	gene-GTA08_BOTSDO10386(GTA08_BOTSDO10386)	-
GO:0046914	MF	transition metal ion binding	16	26	42	788	0.551732	0.864909	gene-GTA08_BOTSDO01755(GTA08_BOTSDO01755);gene-GTA08_BOTSDO02023(GTA08_BOTSDO02023);gene-GTA08_BOTSDO02974(GTA08_BOTSDO02974);gene-GTA08_BOTSDO05313(GTA08_BOTSDO05313);gene-GTA08_BOTSDO07625(GTA08_BOTSDO07625);gene-GTA08_BOTSDO09565(GTA08_BOTSDO09565);gene-GTA08_BOTSDO09573(GTA08_BOTSDO09573);gene-GTA08_BOTSDO10475(GTA08_BOTSDO10475);gene-GTA08_BOTSDO10523(GTA08_BOTSDO10523);gene-GTA08_BOTSDO1158…	gene-GTA08_BOTSDO00371(GTA08_BOTSDO00371);gene-GTA08_BOTSDO00382(GTA08_BOTSDO00382);gene-GTA08_BOTSDO00477(GTA08_BOTSDO00477);gene-GTA08_BOTSDO01663(GTA08_BOTSDO01663);gene-GTA08_BOTSDO01670(GTA08_BOTSDO01670);gene-GTA08_BOTSDO01717(GTA08_BOTSDO01717);gene-GTA08_BOTSDO01731(GTA08_BOTSDO01731);gene-GTA08_BOTSDO01846(GTA08_BOTSDO01846);gene-GTA08_BOTSDO01878(GTA08_BOTSDO01878);gene-GTA08_BOTSDO0276…
GO:0017056	MF	structural constituent of nuclear pore	0	2	2	34	0.552974	0.864909	-	gene-GTA08_BOTSDO05301(GTA08_BOTSDO05301);gene-GTA08_BOTSDO05670(GTA08_BOTSDO05670)
GO:0015297	MF	antiporter activity	0	1	1	15	0.564026	0.873239	-	gene-GTA08_BOTSDO09892(GTA08_BOTSDO09892)
GO:0016891	MF	endoribonuclease activity, producing 5'-phosphomonoesters	0	1	1	15	0.564026	0.873239	-	gene-GTA08_BOTSDO04125(GTA08_BOTSDO04125)
GO:0004571	MF	mannosyl-oligosaccharide 1,2-alpha-mannosidase activity	0	1	1	16	0.58753	0.891525	-	gene-GTA08_BOTSDO13888(GTA08_BOTSDO13888)
GO:0005261	MF	cation channel activity	0	1	1	16	0.58753	0.891525	-	gene-GTA08_BOTSDO10310(GTA08_BOTSDO10310)
GO:0009678	MF	pyrophosphate hydrolysis-driven proton transmembrane transporter activity	0	1	1	16	0.58753	0.891525	-	gene-GTA08_BOTSDO00110(GTA08_BOTSDO00110)
GO:0015924	MF	mannosyl-oligosaccharide mannosidase activity	0	1	1	16	0.58753	0.891525	-	gene-GTA08_BOTSDO13888(GTA08_BOTSDO13888)
GO:0015291	MF	secondary active transmembrane transporter activity	0	2	2	37	0.599473	0.905145	-	gene-GTA08_BOTSDO09892(GTA08_BOTSDO09892);gene-GTA08_BOTSDO13953(GTA08_BOTSDO13953)
GO:0015103	MF	inorganic anion transmembrane transporter activity	0	1	1	17	0.60977	0.916157	-	gene-GTA08_BOTSDO09892(GTA08_BOTSDO09892)
GO:0008237	MF	metallopeptidase activity	0	3	3	60	0.633886	0.947721	-	gene-GTA08_BOTSDO01758(GTA08_BOTSDO01758);gene-GTA08_BOTSDO05396(GTA08_BOTSDO05396);gene-GTA08_BOTSDO08012(GTA08_BOTSDO08012)
GO:0016893	MF	endonuclease activity, active with either ribo- or deoxyribonucleic acids and producing 5'-phosphomonoesters	0	1	1	19	0.650727	0.968155	-	gene-GTA08_BOTSDO04125(GTA08_BOTSDO04125)
GO:0004518	MF	nuclease activity	1	3	4	83	0.660131	0.977379	gene-GTA08_BOTSDO03712(GTA08_BOTSDO03712)	gene-GTA08_BOTSDO02033(GTA08_BOTSDO02033);gene-GTA08_BOTSDO04125(GTA08_BOTSDO04125);gene-GTA08_BOTSDO10643(GTA08_BOTSDO10643)
GO:0008170	MF	N-methyltransferase activity	0	1	1	20	0.669568	0.986562	-	gene-GTA08_BOTSDO01769(GTA08_BOTSDO01769)
GO:0016645	MF	oxidoreductase activity, acting on the CH-NH group of donors	0	1	1	21	0.687397	0.993712	-	gene-GTA08_BOTSDO11859(GTA08_BOTSDO11859)
GO:0016860	MF	intramolecular oxidoreductase activity	1	0	1	21	0.687397	0.993712	gene-GTA08_BOTSDO01182(GTA08_BOTSDO01182)	-
GO:1990837	MF	sequence-specific double-stranded DNA binding	1	0	1	21	0.687397	0.993712	gene-GTA08_BOTSDO00957(GTA08_BOTSDO00957)	-
GO:0008238	MF	exopeptidase activity	1	2	3	65	0.687453	0.993712	gene-GTA08_BOTSDO08711(GTA08_BOTSDO08711)	gene-GTA08_BOTSDO02339(GTA08_BOTSDO02339);gene-GTA08_BOTSDO09127(GTA08_BOTSDO09127)
GO:0016811	MF	hydrolase activity, acting on carbon-nitrogen (but not peptide) bonds, in linear amides	0	1	1	22	0.704265	1	-	gene-GTA08_BOTSDO05670(GTA08_BOTSDO05670)
GO:0019842	MF	vitamin binding	3	2	5	109	0.705552	1	gene-GTA08_BOTSDO02628(GTA08_BOTSDO02628);gene-GTA08_BOTSDO06380(GTA08_BOTSDO06380);gene-GTA08_BOTSDO07016(GTA08_BOTSDO07016)	gene-GTA08_BOTSDO01818(GTA08_BOTSDO01818);gene-GTA08_BOTSDO13890(GTA08_BOTSDO13890)
GO:0015926	MF	glucosidase activity	1	0	1	23	0.720227	1	gene-GTA08_BOTSDO10386(GTA08_BOTSDO10386)	-
GO:0016874	MF	ligase activity	2	8	10	214	0.723199	1	gene-GTA08_BOTSDO05153(GTA08_BOTSDO05153);gene-GTA08_BOTSDO13615(GTA08_BOTSDO13615)	gene-GTA08_BOTSDO00771(GTA08_BOTSDO00771);gene-GTA08_BOTSDO01872(GTA08_BOTSDO01872);gene-GTA08_BOTSDO10601(GTA08_BOTSDO10601);gene-GTA08_BOTSDO11607(GTA08_BOTSDO11607);gene-GTA08_BOTSDO12103(GTA08_BOTSDO12103);gene-GTA08_BOTSDO12108(GTA08_BOTSDO12108);gene-GTA08_BOTSDO12256(GTA08_BOTSDO12256);gene-GTA08_BOTSDO12276(GTA08_BOTSDO12276)
GO:0015077	MF	monovalent inorganic cation transmembrane transporter activity	0	4	4	91	0.729454	1	-	gene-GTA08_BOTSDO00110(GTA08_BOTSDO00110);gene-GTA08_BOTSDO00662(GTA08_BOTSDO00662);gene-GTA08_BOTSDO10310(GTA08_BOTSDO10310);gene-GTA08_BOTSDO13953(GTA08_BOTSDO13953)
GO:0004559	MF	alpha-mannosidase activity	0	1	1	24	0.735329	1	-	gene-GTA08_BOTSDO13888(GTA08_BOTSDO13888)
GO:0015923	MF	mannosidase activity	0	1	1	24	0.735329	1	-	gene-GTA08_BOTSDO13888(GTA08_BOTSDO13888)
GO:0016616	MF	oxidoreductase activity, acting on the CH-OH group of donors, NAD or NADP as acceptor	0	4	4	93	0.745033	1	-	gene-GTA08_BOTSDO02849(GTA08_BOTSDO02849);gene-GTA08_BOTSDO04126(GTA08_BOTSDO04126);gene-GTA08_BOTSDO04889(GTA08_BOTSDO04889);gene-GTA08_BOTSDO11986(GTA08_BOTSDO11986)
GO:0005216	MF	ion channel activity	0	1	1	25	0.749618	1	-	gene-GTA08_BOTSDO10310(GTA08_BOTSDO10310)
GO:0051539	MF	4 iron, 4 sulfur cluster binding	1	0	1	25	0.749618	1	gene-GTA08_BOTSDO01396(GTA08_BOTSDO01396)	-
GO:0015267	MF	channel activity	0	1	1	26	0.763138	1	-	gene-GTA08_BOTSDO10310(GTA08_BOTSDO10310)
GO:0022803	MF	passive transmembrane transporter activity	0	1	1	26	0.763138	1	-	gene-GTA08_BOTSDO10310(GTA08_BOTSDO10310)
GO:0004521	MF	endoribonuclease activity	0	1	1	27	0.77593	1	-	gene-GTA08_BOTSDO04125(GTA08_BOTSDO04125)
GO:0016835	MF	carbon-oxygen lyase activity	1	1	2	52	0.778017	1	gene-GTA08_BOTSDO00584(GTA08_BOTSDO00584)	gene-GTA08_BOTSDO11714(GTA08_BOTSDO11714)
GO:0004177	MF	aminopeptidase activity	0	1	1	28	0.788033	1	-	gene-GTA08_BOTSDO02339(GTA08_BOTSDO02339)
GO:0019829	MF	ATPase-coupled cation transmembrane transporter activity	0	1	1	28	0.788033	1	-	gene-GTA08_BOTSDO00110(GTA08_BOTSDO00110)
GO:0042625	MF	ATPase-coupled ion transmembrane transporter activity	0	1	1	28	0.788033	1	-	gene-GTA08_BOTSDO00110(GTA08_BOTSDO00110)
GO:0022890	MF	inorganic cation transmembrane transporter activity	1	5	6	144	0.795007	1	gene-GTA08_BOTSDO03968(GTA08_BOTSDO03968)	gene-GTA08_BOTSDO00110(GTA08_BOTSDO00110);gene-GTA08_BOTSDO00662(GTA08_BOTSDO00662);gene-GTA08_BOTSDO05395(GTA08_BOTSDO05395);gene-GTA08_BOTSDO10310(GTA08_BOTSDO10310);gene-GTA08_BOTSDO13953(GTA08_BOTSDO13953)
GO:0003746	MF	translation elongation factor activity	0	1	1	29	0.799484	1	-	gene-GTA08_BOTSDO08537(GTA08_BOTSDO08537)
GO:0008171	MF	O-methyltransferase activity	1	0	1	29	0.799484	1	gene-GTA08_BOTSDO13636(GTA08_BOTSDO13636)	-
GO:0008080	MF	N-acetyltransferase activity	2	0	2	56	0.812077	1	gene-GTA08_BOTSDO01276(GTA08_BOTSDO01276);gene-GTA08_BOTSDO11589(GTA08_BOTSDO11589)	-
GO:0005509	MF	calcium ion binding	1	1	2	58	0.827298	1	gene-GTA08_BOTSDO10962(GTA08_BOTSDO10962)	gene-GTA08_BOTSDO13888(GTA08_BOTSDO13888)
GO:0016410	MF	N-acyltransferase activity	2	0	2	58	0.827298	1	gene-GTA08_BOTSDO01276(GTA08_BOTSDO01276);gene-GTA08_BOTSDO11589(GTA08_BOTSDO11589)	-
GO:0022853	MF	active ion transmembrane transporter activity	0	2	2	58	0.827298	1	-	gene-GTA08_BOTSDO00110(GTA08_BOTSDO00110);gene-GTA08_BOTSDO13953(GTA08_BOTSDO13953)
GO:0004527	MF	exonuclease activity	0	1	1	32	0.830267	1	-	gene-GTA08_BOTSDO10643(GTA08_BOTSDO10643)
GO:0034061	MF	DNA polymerase activity	1	0	1	33	0.839443	1	gene-GTA08_BOTSDO05356(GTA08_BOTSDO05356)	-
GO:0016836	MF	hydro-lyase activity	0	1	1	35	0.856337	1	-	gene-GTA08_BOTSDO11714(GTA08_BOTSDO11714)
GO:0004540	MF	ribonuclease activity	0	1	1	37	0.871457	1	-	gene-GTA08_BOTSDO04125(GTA08_BOTSDO04125)
GO:0008324	MF	cation transmembrane transporter activity	1	5	6	163	0.879548	1	gene-GTA08_BOTSDO03968(GTA08_BOTSDO03968)	gene-GTA08_BOTSDO00110(GTA08_BOTSDO00110);gene-GTA08_BOTSDO00662(GTA08_BOTSDO00662);gene-GTA08_BOTSDO05395(GTA08_BOTSDO05395);gene-GTA08_BOTSDO10310(GTA08_BOTSDO10310);gene-GTA08_BOTSDO13953(GTA08_BOTSDO13953)
GO:0003690	MF	double-stranded DNA binding	1	0	1	40	0.891215	1	gene-GTA08_BOTSDO00957(GTA08_BOTSDO00957)	-
GO:0008509	MF	anion transmembrane transporter activity	2	1	3	96	0.896791	1	gene-GTA08_BOTSDO00735(GTA08_BOTSDO00735);gene-GTA08_BOTSDO04858(GTA08_BOTSDO04858)	gene-GTA08_BOTSDO09892(GTA08_BOTSDO09892)
GO:0030170	MF	pyridoxal phosphate binding	2	0	2	70	0.897439	1	gene-GTA08_BOTSDO02628(GTA08_BOTSDO02628);gene-GTA08_BOTSDO06380(GTA08_BOTSDO06380)	-
GO:0070279	MF	vitamin B6 binding	2	0	2	70	0.897439	1	gene-GTA08_BOTSDO02628(GTA08_BOTSDO02628);gene-GTA08_BOTSDO06380(GTA08_BOTSDO06380)	-
GO:0015318	MF	inorganic molecular entity transmembrane transporter activity	3	6	9	237	0.899044	1	gene-GTA08_BOTSDO00735(GTA08_BOTSDO00735);gene-GTA08_BOTSDO03968(GTA08_BOTSDO03968);gene-GTA08_BOTSDO04858(GTA08_BOTSDO04858)	gene-GTA08_BOTSDO00110(GTA08_BOTSDO00110);gene-GTA08_BOTSDO00662(GTA08_BOTSDO00662);gene-GTA08_BOTSDO05395(GTA08_BOTSDO05395);gene-GTA08_BOTSDO09892(GTA08_BOTSDO09892);gene-GTA08_BOTSDO10310(GTA08_BOTSDO10310);gene-GTA08_BOTSDO13953(GTA08_BOTSDO13953)
GO:0008757	MF	S-adenosylmethionine-dependent methyltransferase activity	0	1	1	42	0.902674	1	-	gene-GTA08_BOTSDO01769(GTA08_BOTSDO01769)
GO:0005342	MF	organic acid transmembrane transporter activity	2	0	2	72	0.906168	1	gene-GTA08_BOTSDO00735(GTA08_BOTSDO00735);gene-GTA08_BOTSDO04858(GTA08_BOTSDO04858)	-
GO:0046943	MF	carboxylic acid transmembrane transporter activity	2	0	2	72	0.906168	1	gene-GTA08_BOTSDO00735(GTA08_BOTSDO00735);gene-GTA08_BOTSDO04858(GTA08_BOTSDO04858)	-
GO:0015078	MF	proton transmembrane transporter activity	0	2	2	73	0.910269	1	-	gene-GTA08_BOTSDO00110(GTA08_BOTSDO00110);gene-GTA08_BOTSDO13953(GTA08_BOTSDO13953)
GO:0042578	MF	phosphoric ester hydrolase activity	3	0	3	100	0.911661	1	gene-GTA08_BOTSDO05268(GTA08_BOTSDO05268);gene-GTA08_BOTSDO05964(GTA08_BOTSDO05964);gene-GTA08_BOTSDO12331(GTA08_BOTSDO12331)	-
GO:0008514	MF	organic anion transmembrane transporter activity	2	0	2	76	0.921586	1	gene-GTA08_BOTSDO00735(GTA08_BOTSDO00735);gene-GTA08_BOTSDO04858(GTA08_BOTSDO04858)	-
GO:0016779	MF	nucleotidyltransferase activity	2	1	3	104	0.924563	1	gene-GTA08_BOTSDO03712(GTA08_BOTSDO03712);gene-GTA08_BOTSDO05356(GTA08_BOTSDO05356)	gene-GTA08_BOTSDO11445(GTA08_BOTSDO11445)
GO:0022804	MF	active transmembrane transporter activity	0	3	3	104	0.924563	1	-	gene-GTA08_BOTSDO00110(GTA08_BOTSDO00110);gene-GTA08_BOTSDO09892(GTA08_BOTSDO09892);gene-GTA08_BOTSDO13953(GTA08_BOTSDO13953)
GO:0043167	MF	ion binding	46	61	107	2216	0.932429	1	gene-GTA08_BOTSDO00398(GTA08_BOTSDO00398);gene-GTA08_BOTSDO00584(GTA08_BOTSDO00584);gene-GTA08_BOTSDO00957(GTA08_BOTSDO00957);gene-GTA08_BOTSDO01396(GTA08_BOTSDO01396);gene-GTA08_BOTSDO01755(GTA08_BOTSDO01755);gene-GTA08_BOTSDO02023(GTA08_BOTSDO02023);gene-GTA08_BOTSDO02300(GTA08_BOTSDO02300);gene-GTA08_BOTSDO02628(GTA08_BOTSDO02628);gene-GTA08_BOTSDO02974(GTA08_BOTSDO02974);gene-GTA08_BOTSDO0360…	gene-GTA08_BOTSDO00110(GTA08_BOTSDO00110);gene-GTA08_BOTSDO00341(GTA08_BOTSDO00341);gene-GTA08_BOTSDO00350(GTA08_BOTSDO00350);gene-GTA08_BOTSDO00371(GTA08_BOTSDO00371);gene-GTA08_BOTSDO00382(GTA08_BOTSDO00382);gene-GTA08_BOTSDO00477(GTA08_BOTSDO00477);gene-GTA08_BOTSDO00738(GTA08_BOTSDO00738);gene-GTA08_BOTSDO00783(GTA08_BOTSDO00783);gene-GTA08_BOTSDO01663(GTA08_BOTSDO01663);gene-GTA08_BOTSDO0167…
GO:0008483	MF	transaminase activity	1	0	1	49	0.934096	1	gene-GTA08_BOTSDO02628(GTA08_BOTSDO02628)	-
GO:0016769	MF	transferase activity, transferring nitrogenous groups	1	0	1	49	0.934096	1	gene-GTA08_BOTSDO02628(GTA08_BOTSDO02628)	-
GO:0015075	MF	ion transmembrane transporter activity	3	6	9	253	0.934323	1	gene-GTA08_BOTSDO00735(GTA08_BOTSDO00735);gene-GTA08_BOTSDO03968(GTA08_BOTSDO03968);gene-GTA08_BOTSDO04858(GTA08_BOTSDO04858)	gene-GTA08_BOTSDO00110(GTA08_BOTSDO00110);gene-GTA08_BOTSDO00662(GTA08_BOTSDO00662);gene-GTA08_BOTSDO05395(GTA08_BOTSDO05395);gene-GTA08_BOTSDO09892(GTA08_BOTSDO09892);gene-GTA08_BOTSDO10310(GTA08_BOTSDO10310);gene-GTA08_BOTSDO13953(GTA08_BOTSDO13953)
GO:0016773	MF	phosphotransferase activity, alcohol group as acceptor	2	4	6	191	0.949756	1	gene-GTA08_BOTSDO03374(GTA08_BOTSDO03374);gene-GTA08_BOTSDO04463(GTA08_BOTSDO04463)	gene-GTA08_BOTSDO04147(GTA08_BOTSDO04147);gene-GTA08_BOTSDO07933(GTA08_BOTSDO07933);gene-GTA08_BOTSDO09111(GTA08_BOTSDO09111);gene-GTA08_BOTSDO13610(GTA08_BOTSDO13610)
GO:0051536	MF	iron-sulfur cluster binding	1	0	1	54	0.950128	1	gene-GTA08_BOTSDO01396(GTA08_BOTSDO01396)	-
GO:0051540	MF	metal cluster binding	1	0	1	54	0.950128	1	gene-GTA08_BOTSDO01396(GTA08_BOTSDO01396)	-
GO:0016301	MF	kinase activity	5	4	9	264	0.951889	1	gene-GTA08_BOTSDO02119(GTA08_BOTSDO02119);gene-GTA08_BOTSDO03374(GTA08_BOTSDO03374);gene-GTA08_BOTSDO04463(GTA08_BOTSDO04463);gene-GTA08_BOTSDO11135(GTA08_BOTSDO11135);gene-GTA08_BOTSDO12946(GTA08_BOTSDO12946)	gene-GTA08_BOTSDO04147(GTA08_BOTSDO04147);gene-GTA08_BOTSDO07933(GTA08_BOTSDO07933);gene-GTA08_BOTSDO09111(GTA08_BOTSDO09111);gene-GTA08_BOTSDO13610(GTA08_BOTSDO13610)
GO:0140096	MF	catalytic activity, acting on a protein	4	16	20	513	0.95593	1	gene-GTA08_BOTSDO06236(GTA08_BOTSDO06236);gene-GTA08_BOTSDO07349(GTA08_BOTSDO07349);gene-GTA08_BOTSDO08711(GTA08_BOTSDO08711);gene-GTA08_BOTSDO09315(GTA08_BOTSDO09315)	gene-GTA08_BOTSDO00884(GTA08_BOTSDO00884);gene-GTA08_BOTSDO01758(GTA08_BOTSDO01758);gene-GTA08_BOTSDO02339(GTA08_BOTSDO02339);gene-GTA08_BOTSDO03475(GTA08_BOTSDO03475);gene-GTA08_BOTSDO03981(GTA08_BOTSDO03981);gene-GTA08_BOTSDO03986(GTA08_BOTSDO03986);gene-GTA08_BOTSDO04544(GTA08_BOTSDO04544);gene-GTA08_BOTSDO05396(GTA08_BOTSDO05396);gene-GTA08_BOTSDO07307(GTA08_BOTSDO07307);gene-GTA08_BOTSDO0755…
GO:0016758	MF	transferase activity, transferring hexosyl groups	0	1	1	57	0.957814	1	-	gene-GTA08_BOTSDO02847(GTA08_BOTSDO02847)
GO:0042626	MF	ATPase-coupled transmembrane transporter activity	0	1	1	62	0.968089	1	-	gene-GTA08_BOTSDO00110(GTA08_BOTSDO00110)
GO:0015171	MF	amino acid transmembrane transporter activity	1	0	1	66	0.974479	1	gene-GTA08_BOTSDO00735(GTA08_BOTSDO00735)	-
GO:0015399	MF	primary active transmembrane transporter activity	0	1	1	67	0.975866	1	-	gene-GTA08_BOTSDO00110(GTA08_BOTSDO00110)
GO:0140097	MF	catalytic activity, acting on DNA	1	0	1	67	0.975866	1	gene-GTA08_BOTSDO05356(GTA08_BOTSDO05356)	-
GO:0016853	MF	isomerase activity	1	1	2	102	0.976597	1	gene-GTA08_BOTSDO01182(GTA08_BOTSDO01182)	gene-GTA08_BOTSDO09905(GTA08_BOTSDO09905)
GO:0005215	MF	transporter activity	5	9	14	412	0.980308	1	gene-GTA08_BOTSDO00735(GTA08_BOTSDO00735);gene-GTA08_BOTSDO03968(GTA08_BOTSDO03968);gene-GTA08_BOTSDO04858(GTA08_BOTSDO04858);gene-GTA08_BOTSDO05267(GTA08_BOTSDO05267);gene-GTA08_BOTSDO05292(GTA08_BOTSDO05292)	gene-GTA08_BOTSDO00110(GTA08_BOTSDO00110);gene-GTA08_BOTSDO00662(GTA08_BOTSDO00662);gene-GTA08_BOTSDO05395(GTA08_BOTSDO05395);gene-GTA08_BOTSDO08019(GTA08_BOTSDO08019);gene-GTA08_BOTSDO09111(GTA08_BOTSDO09111);gene-GTA08_BOTSDO09892(GTA08_BOTSDO09892);gene-GTA08_BOTSDO10310(GTA08_BOTSDO10310);gene-GTA08_BOTSDO13198(GTA08_BOTSDO13198);gene-GTA08_BOTSDO13953(GTA08_BOTSDO13953)
GO:0022857	MF	transmembrane transporter activity	3	8	11	343	0.981037	1	gene-GTA08_BOTSDO00735(GTA08_BOTSDO00735);gene-GTA08_BOTSDO03968(GTA08_BOTSDO03968);gene-GTA08_BOTSDO04858(GTA08_BOTSDO04858)	gene-GTA08_BOTSDO00110(GTA08_BOTSDO00110);gene-GTA08_BOTSDO00662(GTA08_BOTSDO00662);gene-GTA08_BOTSDO05395(GTA08_BOTSDO05395);gene-GTA08_BOTSDO08019(GTA08_BOTSDO08019);gene-GTA08_BOTSDO09892(GTA08_BOTSDO09892);gene-GTA08_BOTSDO10310(GTA08_BOTSDO10310);gene-GTA08_BOTSDO13198(GTA08_BOTSDO13198);gene-GTA08_BOTSDO13953(GTA08_BOTSDO13953)
GO:0043168	MF	anion binding	21	24	45	1085	0.982314	1	gene-GTA08_BOTSDO00398(GTA08_BOTSDO00398);gene-GTA08_BOTSDO01396(GTA08_BOTSDO01396);gene-GTA08_BOTSDO01755(GTA08_BOTSDO01755);gene-GTA08_BOTSDO02300(GTA08_BOTSDO02300);gene-GTA08_BOTSDO02628(GTA08_BOTSDO02628);gene-GTA08_BOTSDO03718(GTA08_BOTSDO03718);gene-GTA08_BOTSDO04104(GTA08_BOTSDO04104);gene-GTA08_BOTSDO04463(GTA08_BOTSDO04463);gene-GTA08_BOTSDO04504(GTA08_BOTSDO04504);gene-GTA08_BOTSDO0496…	gene-GTA08_BOTSDO00110(GTA08_BOTSDO00110);gene-GTA08_BOTSDO00341(GTA08_BOTSDO00341);gene-GTA08_BOTSDO00783(GTA08_BOTSDO00783);gene-GTA08_BOTSDO01818(GTA08_BOTSDO01818);gene-GTA08_BOTSDO02647(GTA08_BOTSDO02647);gene-GTA08_BOTSDO04147(GTA08_BOTSDO04147);gene-GTA08_BOTSDO05316(GTA08_BOTSDO05316);gene-GTA08_BOTSDO05511(GTA08_BOTSDO05511);gene-GTA08_BOTSDO05861(GTA08_BOTSDO05861);gene-GTA08_BOTSDO0638…
GO:0016772	MF	transferase activity, transferring phosphorus-containing groups	8	5	13	393	0.982508	1	gene-GTA08_BOTSDO01192(GTA08_BOTSDO01192);gene-GTA08_BOTSDO02119(GTA08_BOTSDO02119);gene-GTA08_BOTSDO03374(GTA08_BOTSDO03374);gene-GTA08_BOTSDO03712(GTA08_BOTSDO03712);gene-GTA08_BOTSDO04463(GTA08_BOTSDO04463);gene-GTA08_BOTSDO05356(GTA08_BOTSDO05356);gene-GTA08_BOTSDO11135(GTA08_BOTSDO11135);gene-GTA08_BOTSDO12946(GTA08_BOTSDO12946)	gene-GTA08_BOTSDO04147(GTA08_BOTSDO04147);gene-GTA08_BOTSDO07933(GTA08_BOTSDO07933);gene-GTA08_BOTSDO09111(GTA08_BOTSDO09111);gene-GTA08_BOTSDO11445(GTA08_BOTSDO11445);gene-GTA08_BOTSDO13610(GTA08_BOTSDO13610)
GO:0043565	MF	sequence-specific DNA binding	1	0	1	73	0.982745	1	gene-GTA08_BOTSDO00957(GTA08_BOTSDO00957)	-
GO:0008168	MF	methyltransferase activity	3	2	5	197	0.983731	1	gene-GTA08_BOTSDO04868(GTA08_BOTSDO04868);gene-GTA08_BOTSDO09616(GTA08_BOTSDO09616);gene-GTA08_BOTSDO13636(GTA08_BOTSDO13636)	gene-GTA08_BOTSDO01769(GTA08_BOTSDO01769);gene-GTA08_BOTSDO07674(GTA08_BOTSDO07674)
GO:0016741	MF	transferase activity, transferring one-carbon groups	3	2	5	203	0.987079	1	gene-GTA08_BOTSDO04868(GTA08_BOTSDO04868);gene-GTA08_BOTSDO09616(GTA08_BOTSDO09616);gene-GTA08_BOTSDO13636(GTA08_BOTSDO13636)	gene-GTA08_BOTSDO01769(GTA08_BOTSDO01769);gene-GTA08_BOTSDO07674(GTA08_BOTSDO07674)
GO:0000981	MF	DNA-binding transcription factor activity, RNA polymerase II-specific	2	0	2	123	0.991539	1	gene-GTA08_BOTSDO02974(GTA08_BOTSDO02974);gene-GTA08_BOTSDO09573(GTA08_BOTSDO09573)	-
GO:0000166	MF	nucleotide binding	18	27	45	1134	0.993356	1	gene-GTA08_BOTSDO00398(GTA08_BOTSDO00398);gene-GTA08_BOTSDO01396(GTA08_BOTSDO01396);gene-GTA08_BOTSDO01755(GTA08_BOTSDO01755);gene-GTA08_BOTSDO02300(GTA08_BOTSDO02300);gene-GTA08_BOTSDO03718(GTA08_BOTSDO03718);gene-GTA08_BOTSDO04104(GTA08_BOTSDO04104);gene-GTA08_BOTSDO04463(GTA08_BOTSDO04463);gene-GTA08_BOTSDO04504(GTA08_BOTSDO04504);gene-GTA08_BOTSDO04967(GTA08_BOTSDO04967);gene-GTA08_BOTSDO0542…	gene-GTA08_BOTSDO00110(GTA08_BOTSDO00110);gene-GTA08_BOTSDO00341(GTA08_BOTSDO00341);gene-GTA08_BOTSDO00783(GTA08_BOTSDO00783);gene-GTA08_BOTSDO02647(GTA08_BOTSDO02647);gene-GTA08_BOTSDO02849(GTA08_BOTSDO02849);gene-GTA08_BOTSDO03886(GTA08_BOTSDO03886);gene-GTA08_BOTSDO04126(GTA08_BOTSDO04126);gene-GTA08_BOTSDO04147(GTA08_BOTSDO04147);gene-GTA08_BOTSDO04889(GTA08_BOTSDO04889);gene-GTA08_BOTSDO0531…
GO:1901265	MF	nucleoside phosphate binding	18	27	45	1134	0.993356	1	gene-GTA08_BOTSDO00398(GTA08_BOTSDO00398);gene-GTA08_BOTSDO01396(GTA08_BOTSDO01396);gene-GTA08_BOTSDO01755(GTA08_BOTSDO01755);gene-GTA08_BOTSDO02300(GTA08_BOTSDO02300);gene-GTA08_BOTSDO03718(GTA08_BOTSDO03718);gene-GTA08_BOTSDO04104(GTA08_BOTSDO04104);gene-GTA08_BOTSDO04463(GTA08_BOTSDO04463);gene-GTA08_BOTSDO04504(GTA08_BOTSDO04504);gene-GTA08_BOTSDO04967(GTA08_BOTSDO04967);gene-GTA08_BOTSDO0542…	gene-GTA08_BOTSDO00110(GTA08_BOTSDO00110);gene-GTA08_BOTSDO00341(GTA08_BOTSDO00341);gene-GTA08_BOTSDO00783(GTA08_BOTSDO00783);gene-GTA08_BOTSDO02647(GTA08_BOTSDO02647);gene-GTA08_BOTSDO02849(GTA08_BOTSDO02849);gene-GTA08_BOTSDO03886(GTA08_BOTSDO03886);gene-GTA08_BOTSDO04126(GTA08_BOTSDO04126);gene-GTA08_BOTSDO04147(GTA08_BOTSDO04147);gene-GTA08_BOTSDO04889(GTA08_BOTSDO04889);gene-GTA08_BOTSDO0531…
GO:0036094	MF	small molecule binding	21	29	50	1250	0.994781	1	gene-GTA08_BOTSDO00398(GTA08_BOTSDO00398);gene-GTA08_BOTSDO01396(GTA08_BOTSDO01396);gene-GTA08_BOTSDO01755(GTA08_BOTSDO01755);gene-GTA08_BOTSDO02300(GTA08_BOTSDO02300);gene-GTA08_BOTSDO02628(GTA08_BOTSDO02628);gene-GTA08_BOTSDO03718(GTA08_BOTSDO03718);gene-GTA08_BOTSDO04104(GTA08_BOTSDO04104);gene-GTA08_BOTSDO04463(GTA08_BOTSDO04463);gene-GTA08_BOTSDO04504(GTA08_BOTSDO04504);gene-GTA08_BOTSDO0496…	gene-GTA08_BOTSDO00110(GTA08_BOTSDO00110);gene-GTA08_BOTSDO00341(GTA08_BOTSDO00341);gene-GTA08_BOTSDO00783(GTA08_BOTSDO00783);gene-GTA08_BOTSDO01818(GTA08_BOTSDO01818);gene-GTA08_BOTSDO02647(GTA08_BOTSDO02647);gene-GTA08_BOTSDO02849(GTA08_BOTSDO02849);gene-GTA08_BOTSDO03886(GTA08_BOTSDO03886);gene-GTA08_BOTSDO04126(GTA08_BOTSDO04126);gene-GTA08_BOTSDO04147(GTA08_BOTSDO04147);gene-GTA08_BOTSDO0488…
GO:0016740	MF	transferase activity	26	19	45	1158	0.996036	1	gene-GTA08_BOTSDO00293(GTA08_BOTSDO00293);gene-GTA08_BOTSDO01186(GTA08_BOTSDO01186);gene-GTA08_BOTSDO01192(GTA08_BOTSDO01192);gene-GTA08_BOTSDO01193(GTA08_BOTSDO01193);gene-GTA08_BOTSDO01194(GTA08_BOTSDO01194);gene-GTA08_BOTSDO01276(GTA08_BOTSDO01276);gene-GTA08_BOTSDO02119(GTA08_BOTSDO02119);gene-GTA08_BOTSDO02628(GTA08_BOTSDO02628);gene-GTA08_BOTSDO02629(GTA08_BOTSDO02629);gene-GTA08_BOTSDO0337…	gene-GTA08_BOTSDO01769(GTA08_BOTSDO01769);gene-GTA08_BOTSDO01981(GTA08_BOTSDO01981);gene-GTA08_BOTSDO02847(GTA08_BOTSDO02847);gene-GTA08_BOTSDO02900(GTA08_BOTSDO02900);gene-GTA08_BOTSDO04036(GTA08_BOTSDO04036);gene-GTA08_BOTSDO04147(GTA08_BOTSDO04147);gene-GTA08_BOTSDO05070(GTA08_BOTSDO05070);gene-GTA08_BOTSDO05979(GTA08_BOTSDO05979);gene-GTA08_BOTSDO07597(GTA08_BOTSDO07597);gene-GTA08_BOTSDO0767…
GO:0016757	MF	transferase activity, transferring glycosyl groups	0	1	1	100	0.996204	1	-	gene-GTA08_BOTSDO02847(GTA08_BOTSDO02847)
GO:0008135	MF	translation factor activity, RNA binding	0	1	1	108	0.997579	1	-	gene-GTA08_BOTSDO08537(GTA08_BOTSDO08537)
GO:0090079	MF	translation regulator activity, nucleic acid binding	0	1	1	110	0.997837	1	-	gene-GTA08_BOTSDO08537(GTA08_BOTSDO08537)
GO:0045182	MF	translation regulator activity	0	1	1	113	0.998173	1	-	gene-GTA08_BOTSDO08537(GTA08_BOTSDO08537)
GO:0003700	MF	DNA-binding transcription factor activity	2	0	2	157	0.998457	1	gene-GTA08_BOTSDO02974(GTA08_BOTSDO02974);gene-GTA08_BOTSDO09573(GTA08_BOTSDO09573)	-
GO:0140098	MF	catalytic activity, acting on RNA	1	1	2	164	0.99892	1	gene-GTA08_BOTSDO05153(GTA08_BOTSDO05153)	gene-GTA08_BOTSDO04125(GTA08_BOTSDO04125)
GO:0140110	MF	transcription regulator activity	2	0	2	168	0.99912	1	gene-GTA08_BOTSDO02974(GTA08_BOTSDO02974);gene-GTA08_BOTSDO09573(GTA08_BOTSDO09573)	-
GO:0008144	MF	drug binding	13	6	19	641	0.999242	1	gene-GTA08_BOTSDO01396(GTA08_BOTSDO01396);gene-GTA08_BOTSDO01755(GTA08_BOTSDO01755);gene-GTA08_BOTSDO02300(GTA08_BOTSDO02300);gene-GTA08_BOTSDO02628(GTA08_BOTSDO02628);gene-GTA08_BOTSDO03987(GTA08_BOTSDO03987);gene-GTA08_BOTSDO04104(GTA08_BOTSDO04104);gene-GTA08_BOTSDO04463(GTA08_BOTSDO04463);gene-GTA08_BOTSDO04967(GTA08_BOTSDO04967);gene-GTA08_BOTSDO06380(GTA08_BOTSDO06380);gene-GTA08_BOTSDO0910…	gene-GTA08_BOTSDO00110(GTA08_BOTSDO00110);gene-GTA08_BOTSDO04147(GTA08_BOTSDO04147);gene-GTA08_BOTSDO07933(GTA08_BOTSDO07933);gene-GTA08_BOTSDO11445(GTA08_BOTSDO11445);gene-GTA08_BOTSDO12276(GTA08_BOTSDO12276);gene-GTA08_BOTSDO13246(GTA08_BOTSDO13246)
GO:0005524	MF	ATP binding	9	6	15	556	0.999515	1	gene-GTA08_BOTSDO01396(GTA08_BOTSDO01396);gene-GTA08_BOTSDO01755(GTA08_BOTSDO01755);gene-GTA08_BOTSDO02300(GTA08_BOTSDO02300);gene-GTA08_BOTSDO04463(GTA08_BOTSDO04463);gene-GTA08_BOTSDO04967(GTA08_BOTSDO04967);gene-GTA08_BOTSDO09104(GTA08_BOTSDO09104);gene-GTA08_BOTSDO10508(GTA08_BOTSDO10508);gene-GTA08_BOTSDO10539(GTA08_BOTSDO10539);gene-GTA08_BOTSDO11135(GTA08_BOTSDO11135)	gene-GTA08_BOTSDO00110(GTA08_BOTSDO00110);gene-GTA08_BOTSDO04147(GTA08_BOTSDO04147);gene-GTA08_BOTSDO07933(GTA08_BOTSDO07933);gene-GTA08_BOTSDO11445(GTA08_BOTSDO11445);gene-GTA08_BOTSDO12276(GTA08_BOTSDO12276);gene-GTA08_BOTSDO13246(GTA08_BOTSDO13246)
GO:0032559	MF	adenyl ribonucleotide binding	9	6	15	560	0.999577	1	gene-GTA08_BOTSDO01396(GTA08_BOTSDO01396);gene-GTA08_BOTSDO01755(GTA08_BOTSDO01755);gene-GTA08_BOTSDO02300(GTA08_BOTSDO02300);gene-GTA08_BOTSDO04463(GTA08_BOTSDO04463);gene-GTA08_BOTSDO04967(GTA08_BOTSDO04967);gene-GTA08_BOTSDO09104(GTA08_BOTSDO09104);gene-GTA08_BOTSDO10508(GTA08_BOTSDO10508);gene-GTA08_BOTSDO10539(GTA08_BOTSDO10539);gene-GTA08_BOTSDO11135(GTA08_BOTSDO11135)	gene-GTA08_BOTSDO00110(GTA08_BOTSDO00110);gene-GTA08_BOTSDO04147(GTA08_BOTSDO04147);gene-GTA08_BOTSDO07933(GTA08_BOTSDO07933);gene-GTA08_BOTSDO11445(GTA08_BOTSDO11445);gene-GTA08_BOTSDO12276(GTA08_BOTSDO12276);gene-GTA08_BOTSDO13246(GTA08_BOTSDO13246)
GO:0030554	MF	adenyl nucleotide binding	9	6	15	562	0.999605	1	gene-GTA08_BOTSDO01396(GTA08_BOTSDO01396);gene-GTA08_BOTSDO01755(GTA08_BOTSDO01755);gene-GTA08_BOTSDO02300(GTA08_BOTSDO02300);gene-GTA08_BOTSDO04463(GTA08_BOTSDO04463);gene-GTA08_BOTSDO04967(GTA08_BOTSDO04967);gene-GTA08_BOTSDO09104(GTA08_BOTSDO09104);gene-GTA08_BOTSDO10508(GTA08_BOTSDO10508);gene-GTA08_BOTSDO10539(GTA08_BOTSDO10539);gene-GTA08_BOTSDO11135(GTA08_BOTSDO11135)	gene-GTA08_BOTSDO00110(GTA08_BOTSDO00110);gene-GTA08_BOTSDO04147(GTA08_BOTSDO04147);gene-GTA08_BOTSDO07933(GTA08_BOTSDO07933);gene-GTA08_BOTSDO11445(GTA08_BOTSDO11445);gene-GTA08_BOTSDO12276(GTA08_BOTSDO12276);gene-GTA08_BOTSDO13246(GTA08_BOTSDO13246)
GO:0097367	MF	carbohydrate derivative binding	12	9	21	715	0.999663	1	gene-GTA08_BOTSDO00398(GTA08_BOTSDO00398);gene-GTA08_BOTSDO01396(GTA08_BOTSDO01396);gene-GTA08_BOTSDO01755(GTA08_BOTSDO01755);gene-GTA08_BOTSDO02300(GTA08_BOTSDO02300);gene-GTA08_BOTSDO03987(GTA08_BOTSDO03987);gene-GTA08_BOTSDO04104(GTA08_BOTSDO04104);gene-GTA08_BOTSDO04463(GTA08_BOTSDO04463);gene-GTA08_BOTSDO04967(GTA08_BOTSDO04967);gene-GTA08_BOTSDO09104(GTA08_BOTSDO09104);gene-GTA08_BOTSDO1050…	gene-GTA08_BOTSDO00110(GTA08_BOTSDO00110);gene-GTA08_BOTSDO04147(GTA08_BOTSDO04147);gene-GTA08_BOTSDO07439(GTA08_BOTSDO07439);gene-GTA08_BOTSDO07677(GTA08_BOTSDO07677);gene-GTA08_BOTSDO07678(GTA08_BOTSDO07678);gene-GTA08_BOTSDO07933(GTA08_BOTSDO07933);gene-GTA08_BOTSDO11445(GTA08_BOTSDO11445);gene-GTA08_BOTSDO12276(GTA08_BOTSDO12276);gene-GTA08_BOTSDO13246(GTA08_BOTSDO13246)
GO:0005198	MF	structural molecule activity	0	2	2	194	0.999771	1	-	gene-GTA08_BOTSDO05301(GTA08_BOTSDO05301);gene-GTA08_BOTSDO05670(GTA08_BOTSDO05670)
GO:0032553	MF	ribonucleotide binding	10	9	19	700	0.99989	1	gene-GTA08_BOTSDO00398(GTA08_BOTSDO00398);gene-GTA08_BOTSDO01396(GTA08_BOTSDO01396);gene-GTA08_BOTSDO01755(GTA08_BOTSDO01755);gene-GTA08_BOTSDO02300(GTA08_BOTSDO02300);gene-GTA08_BOTSDO04463(GTA08_BOTSDO04463);gene-GTA08_BOTSDO04967(GTA08_BOTSDO04967);gene-GTA08_BOTSDO09104(GTA08_BOTSDO09104);gene-GTA08_BOTSDO10508(GTA08_BOTSDO10508);gene-GTA08_BOTSDO10539(GTA08_BOTSDO10539);gene-GTA08_BOTSDO1113…	gene-GTA08_BOTSDO00110(GTA08_BOTSDO00110);gene-GTA08_BOTSDO04147(GTA08_BOTSDO04147);gene-GTA08_BOTSDO07439(GTA08_BOTSDO07439);gene-GTA08_BOTSDO07677(GTA08_BOTSDO07677);gene-GTA08_BOTSDO07678(GTA08_BOTSDO07678);gene-GTA08_BOTSDO07933(GTA08_BOTSDO07933);gene-GTA08_BOTSDO11445(GTA08_BOTSDO11445);gene-GTA08_BOTSDO12276(GTA08_BOTSDO12276);gene-GTA08_BOTSDO13246(GTA08_BOTSDO13246)
GO:0008270	MF	zinc ion binding	2	8	10	475	0.999929	1	gene-GTA08_BOTSDO02974(GTA08_BOTSDO02974);gene-GTA08_BOTSDO09573(GTA08_BOTSDO09573)	gene-GTA08_BOTSDO00371(GTA08_BOTSDO00371);gene-GTA08_BOTSDO00477(GTA08_BOTSDO00477);gene-GTA08_BOTSDO01878(GTA08_BOTSDO01878);gene-GTA08_BOTSDO03839(GTA08_BOTSDO03839);gene-GTA08_BOTSDO04126(GTA08_BOTSDO04126);gene-GTA08_BOTSDO08536(GTA08_BOTSDO08536);gene-GTA08_BOTSDO13198(GTA08_BOTSDO13198);gene-GTA08_BOTSDO13908(GTA08_BOTSDO13908)
GO:1901363	MF	heterocyclic compound binding	34	51	85	2160	0.999934	1	gene-GTA08_BOTSDO00398(GTA08_BOTSDO00398);gene-GTA08_BOTSDO00957(GTA08_BOTSDO00957);gene-GTA08_BOTSDO01396(GTA08_BOTSDO01396);gene-GTA08_BOTSDO01755(GTA08_BOTSDO01755);gene-GTA08_BOTSDO02023(GTA08_BOTSDO02023);gene-GTA08_BOTSDO02300(GTA08_BOTSDO02300);gene-GTA08_BOTSDO02628(GTA08_BOTSDO02628);gene-GTA08_BOTSDO03718(GTA08_BOTSDO03718);gene-GTA08_BOTSDO04104(GTA08_BOTSDO04104);gene-GTA08_BOTSDO0446…	gene-GTA08_BOTSDO00110(GTA08_BOTSDO00110);gene-GTA08_BOTSDO00341(GTA08_BOTSDO00341);gene-GTA08_BOTSDO00382(GTA08_BOTSDO00382);gene-GTA08_BOTSDO00783(GTA08_BOTSDO00783);gene-GTA08_BOTSDO01663(GTA08_BOTSDO01663);gene-GTA08_BOTSDO01670(GTA08_BOTSDO01670);gene-GTA08_BOTSDO01731(GTA08_BOTSDO01731);gene-GTA08_BOTSDO01736(GTA08_BOTSDO01736);gene-GTA08_BOTSDO01818(GTA08_BOTSDO01818);gene-GTA08_BOTSDO0184…
GO:0097159	MF	organic cyclic compound binding	34	51	85	2161	0.999936	1	gene-GTA08_BOTSDO00398(GTA08_BOTSDO00398);gene-GTA08_BOTSDO00957(GTA08_BOTSDO00957);gene-GTA08_BOTSDO01396(GTA08_BOTSDO01396);gene-GTA08_BOTSDO01755(GTA08_BOTSDO01755);gene-GTA08_BOTSDO02023(GTA08_BOTSDO02023);gene-GTA08_BOTSDO02300(GTA08_BOTSDO02300);gene-GTA08_BOTSDO02628(GTA08_BOTSDO02628);gene-GTA08_BOTSDO03718(GTA08_BOTSDO03718);gene-GTA08_BOTSDO04104(GTA08_BOTSDO04104);gene-GTA08_BOTSDO0446…	gene-GTA08_BOTSDO00110(GTA08_BOTSDO00110);gene-GTA08_BOTSDO00341(GTA08_BOTSDO00341);gene-GTA08_BOTSDO00382(GTA08_BOTSDO00382);gene-GTA08_BOTSDO00783(GTA08_BOTSDO00783);gene-GTA08_BOTSDO01663(GTA08_BOTSDO01663);gene-GTA08_BOTSDO01670(GTA08_BOTSDO01670);gene-GTA08_BOTSDO01731(GTA08_BOTSDO01731);gene-GTA08_BOTSDO01736(GTA08_BOTSDO01736);gene-GTA08_BOTSDO01818(GTA08_BOTSDO01818);gene-GTA08_BOTSDO0184…
GO:0035639	MF	purine ribonucleoside triphosphate binding	9	6	15	646	0.999981	1	gene-GTA08_BOTSDO01396(GTA08_BOTSDO01396);gene-GTA08_BOTSDO01755(GTA08_BOTSDO01755);gene-GTA08_BOTSDO02300(GTA08_BOTSDO02300);gene-GTA08_BOTSDO04463(GTA08_BOTSDO04463);gene-GTA08_BOTSDO04967(GTA08_BOTSDO04967);gene-GTA08_BOTSDO09104(GTA08_BOTSDO09104);gene-GTA08_BOTSDO10508(GTA08_BOTSDO10508);gene-GTA08_BOTSDO10539(GTA08_BOTSDO10539);gene-GTA08_BOTSDO11135(GTA08_BOTSDO11135)	gene-GTA08_BOTSDO00110(GTA08_BOTSDO00110);gene-GTA08_BOTSDO04147(GTA08_BOTSDO04147);gene-GTA08_BOTSDO07933(GTA08_BOTSDO07933);gene-GTA08_BOTSDO11445(GTA08_BOTSDO11445);gene-GTA08_BOTSDO12276(GTA08_BOTSDO12276);gene-GTA08_BOTSDO13246(GTA08_BOTSDO13246)
GO:0032555	MF	purine ribonucleotide binding	9	6	15	650	0.999984	1	gene-GTA08_BOTSDO01396(GTA08_BOTSDO01396);gene-GTA08_BOTSDO01755(GTA08_BOTSDO01755);gene-GTA08_BOTSDO02300(GTA08_BOTSDO02300);gene-GTA08_BOTSDO04463(GTA08_BOTSDO04463);gene-GTA08_BOTSDO04967(GTA08_BOTSDO04967);gene-GTA08_BOTSDO09104(GTA08_BOTSDO09104);gene-GTA08_BOTSDO10508(GTA08_BOTSDO10508);gene-GTA08_BOTSDO10539(GTA08_BOTSDO10539);gene-GTA08_BOTSDO11135(GTA08_BOTSDO11135)	gene-GTA08_BOTSDO00110(GTA08_BOTSDO00110);gene-GTA08_BOTSDO04147(GTA08_BOTSDO04147);gene-GTA08_BOTSDO07933(GTA08_BOTSDO07933);gene-GTA08_BOTSDO11445(GTA08_BOTSDO11445);gene-GTA08_BOTSDO12276(GTA08_BOTSDO12276);gene-GTA08_BOTSDO13246(GTA08_BOTSDO13246)
GO:0017076	MF	purine nucleotide binding	9	6	15	652	0.999985	1	gene-GTA08_BOTSDO01396(GTA08_BOTSDO01396);gene-GTA08_BOTSDO01755(GTA08_BOTSDO01755);gene-GTA08_BOTSDO02300(GTA08_BOTSDO02300);gene-GTA08_BOTSDO04463(GTA08_BOTSDO04463);gene-GTA08_BOTSDO04967(GTA08_BOTSDO04967);gene-GTA08_BOTSDO09104(GTA08_BOTSDO09104);gene-GTA08_BOTSDO10508(GTA08_BOTSDO10508);gene-GTA08_BOTSDO10539(GTA08_BOTSDO10539);gene-GTA08_BOTSDO11135(GTA08_BOTSDO11135)	gene-GTA08_BOTSDO00110(GTA08_BOTSDO00110);gene-GTA08_BOTSDO04147(GTA08_BOTSDO04147);gene-GTA08_BOTSDO07933(GTA08_BOTSDO07933);gene-GTA08_BOTSDO11445(GTA08_BOTSDO11445);gene-GTA08_BOTSDO12276(GTA08_BOTSDO12276);gene-GTA08_BOTSDO13246(GTA08_BOTSDO13246)
GO:0003723	MF	RNA binding	0	2	2	312	1	1	-	gene-GTA08_BOTSDO08537(GTA08_BOTSDO08537);gene-GTA08_BOTSDO11445(GTA08_BOTSDO11445)
GO:0005488	MF	binding	50	80	130	3302	1	1	gene-GTA08_BOTSDO00398(GTA08_BOTSDO00398);gene-GTA08_BOTSDO00584(GTA08_BOTSDO00584);gene-GTA08_BOTSDO00957(GTA08_BOTSDO00957);gene-GTA08_BOTSDO01396(GTA08_BOTSDO01396);gene-GTA08_BOTSDO01755(GTA08_BOTSDO01755);gene-GTA08_BOTSDO02023(GTA08_BOTSDO02023);gene-GTA08_BOTSDO02300(GTA08_BOTSDO02300);gene-GTA08_BOTSDO02628(GTA08_BOTSDO02628);gene-GTA08_BOTSDO02974(GTA08_BOTSDO02974);gene-GTA08_BOTSDO0360…	gene-GTA08_BOTSDO00110(GTA08_BOTSDO00110);gene-GTA08_BOTSDO00341(GTA08_BOTSDO00341);gene-GTA08_BOTSDO00350(GTA08_BOTSDO00350);gene-GTA08_BOTSDO00371(GTA08_BOTSDO00371);gene-GTA08_BOTSDO00382(GTA08_BOTSDO00382);gene-GTA08_BOTSDO00477(GTA08_BOTSDO00477);gene-GTA08_BOTSDO00738(GTA08_BOTSDO00738);gene-GTA08_BOTSDO00783(GTA08_BOTSDO00783);gene-GTA08_BOTSDO01663(GTA08_BOTSDO01663);gene-GTA08_BOTSDO0167…
GO:0003677	MF	DNA binding	1	2	3	406	1	1	gene-GTA08_BOTSDO00957(GTA08_BOTSDO00957)	gene-GTA08_BOTSDO01878(GTA08_BOTSDO01878);gene-GTA08_BOTSDO08536(GTA08_BOTSDO08536)
GO:0003676	MF	nucleic acid binding	2	6	8	943	1	1	gene-GTA08_BOTSDO00957(GTA08_BOTSDO00957);gene-GTA08_BOTSDO06458(GTA08_BOTSDO06458)	gene-GTA08_BOTSDO01878(GTA08_BOTSDO01878);gene-GTA08_BOTSDO02033(GTA08_BOTSDO02033);gene-GTA08_BOTSDO04125(GTA08_BOTSDO04125);gene-GTA08_BOTSDO08536(GTA08_BOTSDO08536);gene-GTA08_BOTSDO08537(GTA08_BOTSDO08537);gene-GTA08_BOTSDO11445(GTA08_BOTSDO11445)
GO:0003674	MF	molecular_function	122	213	335	6229	1	1	gene-GTA08_BOTSDO00024(GTA08_BOTSDO00024);gene-GTA08_BOTSDO00293(GTA08_BOTSDO00293);gene-GTA08_BOTSDO00377(GTA08_BOTSDO00377);gene-GTA08_BOTSDO00398(GTA08_BOTSDO00398);gene-GTA08_BOTSDO00409(GTA08_BOTSDO00409);gene-GTA08_BOTSDO00584(GTA08_BOTSDO00584);gene-GTA08_BOTSDO00735(GTA08_BOTSDO00735);gene-GTA08_BOTSDO00957(GTA08_BOTSDO00957);gene-GTA08_BOTSDO01182(GTA08_BOTSDO01182);gene-GTA08_BOTSDO0118…	gene-GTA08_BOTSDO00012(GTA08_BOTSDO00012);gene-GTA08_BOTSDO00110(GTA08_BOTSDO00110);gene-GTA08_BOTSDO00156(GTA08_BOTSDO00156);gene-GTA08_BOTSDO00332(GTA08_BOTSDO00332);gene-GTA08_BOTSDO00341(GTA08_BOTSDO00341);gene-GTA08_BOTSDO00350(GTA08_BOTSDO00350);gene-GTA08_BOTSDO00371(GTA08_BOTSDO00371);gene-GTA08_BOTSDO00382(GTA08_BOTSDO00382);gene-GTA08_BOTSDO00426(GTA08_BOTSDO00426);gene-GTA08_BOTSDO0047…

## Sheet: 12h
Supplementary Table S2 GO analysis of DGEs screed at 12h time pionts
GO.ID	Category	Term	Up	Down	DEG	Total	Pvalue	adjustPvalue	Up_gene	Down_gene
GO:0055114	BP	oxidation-reduction process	45	120	165	1296	5.14769e-19	2.67165e-16	gene-GTA08_BOTSDO00398(GTA08_BOTSDO00398);gene-GTA08_BOTSDO01631(GTA08_BOTSDO01631);gene-GTA08_BOTSDO01634(GTA08_BOTSDO01634);gene-GTA08_BOTSDO01755(GTA08_BOTSDO01755);gene-GTA08_BOTSDO02023(GTA08_BOTSDO02023);gene-GTA08_BOTSDO02774(GTA08_BOTSDO02774);gene-GTA08_BOTSDO03164(GTA08_BOTSDO03164);gene-GTA08_BOTSDO03402(GTA08_BOTSDO03402);gene-GTA08_BOTSDO03718(GTA08_BOTSDO03718);gene-GTA08_BOTSDO0410…	gene-GTA08_BOTSDO00195(GTA08_BOTSDO00195);gene-GTA08_BOTSDO00341(GTA08_BOTSDO00341);gene-GTA08_BOTSDO00371(GTA08_BOTSDO00371);gene-GTA08_BOTSDO00477(GTA08_BOTSDO00477);gene-GTA08_BOTSDO00535(GTA08_BOTSDO00535);gene-GTA08_BOTSDO00551(GTA08_BOTSDO00551);gene-GTA08_BOTSDO00783(GTA08_BOTSDO00783);gene-GTA08_BOTSDO01094(GTA08_BOTSDO01094);gene-GTA08_BOTSDO01227(GTA08_BOTSDO01227);gene-GTA08_BOTSDO0134…
GO:0005975	BP	carbohydrate metabolic process	10	39	49	398	2.77058e-05	0.00718964	gene-GTA08_BOTSDO01570(GTA08_BOTSDO01570);gene-GTA08_BOTSDO05188(GTA08_BOTSDO05188);gene-GTA08_BOTSDO06307(GTA08_BOTSDO06307);gene-GTA08_BOTSDO07018(GTA08_BOTSDO07018);gene-GTA08_BOTSDO10192(GTA08_BOTSDO10192);gene-GTA08_BOTSDO10386(GTA08_BOTSDO10386);gene-GTA08_BOTSDO10907(GTA08_BOTSDO10907);gene-GTA08_BOTSDO10962(GTA08_BOTSDO10962);gene-GTA08_BOTSDO11212(GTA08_BOTSDO11212);gene-GTA08_BOTSDO1190…	gene-GTA08_BOTSDO00383(GTA08_BOTSDO00383);gene-GTA08_BOTSDO01356(GTA08_BOTSDO01356);gene-GTA08_BOTSDO01891(GTA08_BOTSDO01891);gene-GTA08_BOTSDO02095(GTA08_BOTSDO02095);gene-GTA08_BOTSDO02133(GTA08_BOTSDO02133);gene-GTA08_BOTSDO02303(GTA08_BOTSDO02303);gene-GTA08_BOTSDO02647(GTA08_BOTSDO02647);gene-GTA08_BOTSDO02849(GTA08_BOTSDO02849);gene-GTA08_BOTSDO03462(GTA08_BOTSDO03462);gene-GTA08_BOTSDO0372…
GO:0006071	BP	glycerol metabolic process	0	3	3	4	0.00120191	0.151005	-	gene-GTA08_BOTSDO04147(GTA08_BOTSDO04147);gene-GTA08_BOTSDO07933(GTA08_BOTSDO07933);gene-GTA08_BOTSDO09111(GTA08_BOTSDO09111)
GO:0006066	BP	alcohol metabolic process	1	6	7	26	0.00138872	0.151005	gene-GTA08_BOTSDO11021(GTA08_BOTSDO11021)	gene-GTA08_BOTSDO04147(GTA08_BOTSDO04147);gene-GTA08_BOTSDO07933(GTA08_BOTSDO07933);gene-GTA08_BOTSDO08782(GTA08_BOTSDO08782);gene-GTA08_BOTSDO09111(GTA08_BOTSDO09111);gene-GTA08_BOTSDO13523(GTA08_BOTSDO13523);gene-GTA08_BOTSDO13890(GTA08_BOTSDO13890)
GO:0009072	BP	aromatic amino acid family metabolic process	0	10	10	50	0.0017144	0.151005	-	gene-GTA08_BOTSDO00195(GTA08_BOTSDO00195);gene-GTA08_BOTSDO00716(GTA08_BOTSDO00716);gene-GTA08_BOTSDO04126(GTA08_BOTSDO04126);gene-GTA08_BOTSDO05479(GTA08_BOTSDO05479);gene-GTA08_BOTSDO05670(GTA08_BOTSDO05670);gene-GTA08_BOTSDO06534(GTA08_BOTSDO06534);gene-GTA08_BOTSDO06978(GTA08_BOTSDO06978);gene-GTA08_BOTSDO08782(GTA08_BOTSDO08782);gene-GTA08_BOTSDO11171(GTA08_BOTSDO11171);gene-GTA08_BOTSDO1389…
GO:0009063	BP	cellular amino acid catabolic process	1	8	9	42	0.00174572	0.151005	gene-GTA08_BOTSDO06780(GTA08_BOTSDO06780)	gene-GTA08_BOTSDO00156(GTA08_BOTSDO00156);gene-GTA08_BOTSDO00716(GTA08_BOTSDO00716);gene-GTA08_BOTSDO03575(GTA08_BOTSDO03575);gene-GTA08_BOTSDO05670(GTA08_BOTSDO05670);gene-GTA08_BOTSDO06534(GTA08_BOTSDO06534);gene-GTA08_BOTSDO08733(GTA08_BOTSDO08733);gene-GTA08_BOTSDO08782(GTA08_BOTSDO08782);gene-GTA08_BOTSDO13890(GTA08_BOTSDO13890)
GO:0019400	BP	alditol metabolic process	0	3	3	5	0.00285242	0.155458	-	gene-GTA08_BOTSDO04147(GTA08_BOTSDO04147);gene-GTA08_BOTSDO07933(GTA08_BOTSDO07933);gene-GTA08_BOTSDO09111(GTA08_BOTSDO09111)
GO:0044282	BP	small molecule catabolic process	3	9	12	72	0.00316755	0.155458	gene-GTA08_BOTSDO06780(GTA08_BOTSDO06780);gene-GTA08_BOTSDO07018(GTA08_BOTSDO07018);gene-GTA08_BOTSDO11212(GTA08_BOTSDO11212)	gene-GTA08_BOTSDO00156(GTA08_BOTSDO00156);gene-GTA08_BOTSDO00716(GTA08_BOTSDO00716);gene-GTA08_BOTSDO03575(GTA08_BOTSDO03575);gene-GTA08_BOTSDO05670(GTA08_BOTSDO05670);gene-GTA08_BOTSDO06534(GTA08_BOTSDO06534);gene-GTA08_BOTSDO07597(GTA08_BOTSDO07597);gene-GTA08_BOTSDO08733(GTA08_BOTSDO08733);gene-GTA08_BOTSDO08782(GTA08_BOTSDO08782);gene-GTA08_BOTSDO13890(GTA08_BOTSDO13890)
GO:0055085	BP	transmembrane transport	20	53	73	790	0.0033474	0.155458	gene-GTA08_BOTSDO00218(GTA08_BOTSDO00218);gene-GTA08_BOTSDO02626(GTA08_BOTSDO02626);gene-GTA08_BOTSDO02654(GTA08_BOTSDO02654);gene-GTA08_BOTSDO02880(GTA08_BOTSDO02880);gene-GTA08_BOTSDO03375(GTA08_BOTSDO03375);gene-GTA08_BOTSDO04416(GTA08_BOTSDO04416);gene-GTA08_BOTSDO04858(GTA08_BOTSDO04858);gene-GTA08_BOTSDO04869(GTA08_BOTSDO04869);gene-GTA08_BOTSDO05162(GTA08_BOTSDO05162);gene-GTA08_BOTSDO0526…	gene-GTA08_BOTSDO00110(GTA08_BOTSDO00110);gene-GTA08_BOTSDO00393(GTA08_BOTSDO00393);gene-GTA08_BOTSDO00567(GTA08_BOTSDO00567);gene-GTA08_BOTSDO00662(GTA08_BOTSDO00662);gene-GTA08_BOTSDO01248(GTA08_BOTSDO01248);gene-GTA08_BOTSDO01346(GTA08_BOTSDO01346);gene-GTA08_BOTSDO01431(GTA08_BOTSDO01431);gene-GTA08_BOTSDO01505(GTA08_BOTSDO01505);gene-GTA08_BOTSDO01701(GTA08_BOTSDO01701);gene-GTA08_BOTSDO0173…
GO:0009074	BP	aromatic amino acid family catabolic process	0	5	5	16	0.00337591	0.155458	-	gene-GTA08_BOTSDO00716(GTA08_BOTSDO00716);gene-GTA08_BOTSDO05670(GTA08_BOTSDO05670);gene-GTA08_BOTSDO06534(GTA08_BOTSDO06534);gene-GTA08_BOTSDO08782(GTA08_BOTSDO08782);gene-GTA08_BOTSDO13890(GTA08_BOTSDO13890)
GO:0016054	BP	organic acid catabolic process	1	9	10	55	0.00359441	0.155458	gene-GTA08_BOTSDO06780(GTA08_BOTSDO06780)	gene-GTA08_BOTSDO00156(GTA08_BOTSDO00156);gene-GTA08_BOTSDO00716(GTA08_BOTSDO00716);gene-GTA08_BOTSDO03575(GTA08_BOTSDO03575);gene-GTA08_BOTSDO05670(GTA08_BOTSDO05670);gene-GTA08_BOTSDO06534(GTA08_BOTSDO06534);gene-GTA08_BOTSDO07597(GTA08_BOTSDO07597);gene-GTA08_BOTSDO08733(GTA08_BOTSDO08733);gene-GTA08_BOTSDO08782(GTA08_BOTSDO08782);gene-GTA08_BOTSDO13890(GTA08_BOTSDO13890)
GO:0046395	BP	carboxylic acid catabolic process	1	9	10	55	0.00359441	0.155458	gene-GTA08_BOTSDO06780(GTA08_BOTSDO06780)	gene-GTA08_BOTSDO00156(GTA08_BOTSDO00156);gene-GTA08_BOTSDO00716(GTA08_BOTSDO00716);gene-GTA08_BOTSDO03575(GTA08_BOTSDO03575);gene-GTA08_BOTSDO05670(GTA08_BOTSDO05670);gene-GTA08_BOTSDO06534(GTA08_BOTSDO06534);gene-GTA08_BOTSDO07597(GTA08_BOTSDO07597);gene-GTA08_BOTSDO08733(GTA08_BOTSDO08733);gene-GTA08_BOTSDO08782(GTA08_BOTSDO08782);gene-GTA08_BOTSDO13890(GTA08_BOTSDO13890)
GO:0043335	BP	protein unfolding	2	0	2	2	0.00465578	0.185873	gene-GTA08_BOTSDO07275(GTA08_BOTSDO07275);gene-GTA08_BOTSDO11467(GTA08_BOTSDO11467)	-
GO:0008643	BP	carbohydrate transport	1	10	11	67	0.0052272	0.19378	gene-GTA08_BOTSDO06390(GTA08_BOTSDO06390)	gene-GTA08_BOTSDO00393(GTA08_BOTSDO00393);gene-GTA08_BOTSDO01431(GTA08_BOTSDO01431);gene-GTA08_BOTSDO01505(GTA08_BOTSDO01505);gene-GTA08_BOTSDO05301(GTA08_BOTSDO05301);gene-GTA08_BOTSDO05468(GTA08_BOTSDO05468);gene-GTA08_BOTSDO05743(GTA08_BOTSDO05743);gene-GTA08_BOTSDO07480(GTA08_BOTSDO07480);gene-GTA08_BOTSDO09350(GTA08_BOTSDO09350);gene-GTA08_BOTSDO11764(GTA08_BOTSDO11764);gene-GTA08_BOTSDO1395…
GO:0000947	BP	amino acid catabolic process to alcohol via Ehrlich pathway	0	2	2	3	0.0133342	0.329544	-	gene-GTA08_BOTSDO08782(GTA08_BOTSDO08782);gene-GTA08_BOTSDO13890(GTA08_BOTSDO13890)
GO:0000955	BP	amino acid catabolic process via Ehrlich pathway	0	2	2	3	0.0133342	0.329544	-	gene-GTA08_BOTSDO08782(GTA08_BOTSDO08782);gene-GTA08_BOTSDO13890(GTA08_BOTSDO13890)
GO:0006007	BP	glucose catabolic process	2	0	2	3	0.0133342	0.329544	gene-GTA08_BOTSDO07018(GTA08_BOTSDO07018);gene-GTA08_BOTSDO11212(GTA08_BOTSDO11212)	-
GO:0006559	BP	L-phenylalanine catabolic process	0	2	2	3	0.0133342	0.329544	-	gene-GTA08_BOTSDO00716(GTA08_BOTSDO00716);gene-GTA08_BOTSDO06534(GTA08_BOTSDO06534)
GO:0019320	BP	hexose catabolic process	2	0	2	3	0.0133342	0.329544	gene-GTA08_BOTSDO07018(GTA08_BOTSDO07018);gene-GTA08_BOTSDO11212(GTA08_BOTSDO11212)	-
GO:0046365	BP	monosaccharide catabolic process	2	0	2	3	0.0133342	0.329544	gene-GTA08_BOTSDO07018(GTA08_BOTSDO07018);gene-GTA08_BOTSDO11212(GTA08_BOTSDO11212)	-
GO:1902222	BP	erythrose 4-phosphate/phosphoenolpyruvate family amino acid catabolic process	0	2	2	3	0.0133342	0.329544	-	gene-GTA08_BOTSDO00716(GTA08_BOTSDO00716);gene-GTA08_BOTSDO06534(GTA08_BOTSDO06534)
GO:0098869	BP	cellular oxidant detoxification	3	6	9	60	0.0195277	0.460675	gene-GTA08_BOTSDO01432(GTA08_BOTSDO01432);gene-GTA08_BOTSDO03402(GTA08_BOTSDO03402);gene-GTA08_BOTSDO13964(GTA08_BOTSDO13964)	gene-GTA08_BOTSDO01875(GTA08_BOTSDO01875);gene-GTA08_BOTSDO01877(GTA08_BOTSDO01877);gene-GTA08_BOTSDO02767(GTA08_BOTSDO02767);gene-GTA08_BOTSDO09766(GTA08_BOTSDO09766);gene-GTA08_BOTSDO10464(GTA08_BOTSDO10464);gene-GTA08_BOTSDO12189(GTA08_BOTSDO12189)
GO:0009081	BP	branched-chain amino acid metabolic process	2	3	5	24	0.0209148	0.471947	gene-GTA08_BOTSDO07298(GTA08_BOTSDO07298);gene-GTA08_BOTSDO11490(GTA08_BOTSDO11490)	gene-GTA08_BOTSDO08782(GTA08_BOTSDO08782);gene-GTA08_BOTSDO11714(GTA08_BOTSDO11714);gene-GTA08_BOTSDO13890(GTA08_BOTSDO13890)
GO:1901606	BP	alpha-amino acid catabolic process	1	5	6	33	0.0224231	0.484899	gene-GTA08_BOTSDO06780(GTA08_BOTSDO06780)	gene-GTA08_BOTSDO00716(GTA08_BOTSDO00716);gene-GTA08_BOTSDO05670(GTA08_BOTSDO05670);gene-GTA08_BOTSDO06534(GTA08_BOTSDO06534);gene-GTA08_BOTSDO08782(GTA08_BOTSDO08782);gene-GTA08_BOTSDO13890(GTA08_BOTSDO13890)
GO:1901615	BP	organic hydroxy compound metabolic process	1	7	8	52	0.0234573	0.486973	gene-GTA08_BOTSDO11021(GTA08_BOTSDO11021)	gene-GTA08_BOTSDO04147(GTA08_BOTSDO04147);gene-GTA08_BOTSDO07933(GTA08_BOTSDO07933);gene-GTA08_BOTSDO08782(GTA08_BOTSDO08782);gene-GTA08_BOTSDO09111(GTA08_BOTSDO09111);gene-GTA08_BOTSDO09837(GTA08_BOTSDO09837);gene-GTA08_BOTSDO13523(GTA08_BOTSDO13523);gene-GTA08_BOTSDO13890(GTA08_BOTSDO13890)
GO:0009098	BP	leucine biosynthetic process	2	0	2	4	0.0254664	0.508349	gene-GTA08_BOTSDO07298(GTA08_BOTSDO07298);gene-GTA08_BOTSDO11490(GTA08_BOTSDO11490)	-
GO:0098754	BP	detoxification	3	6	9	64	0.0286469	0.530991	gene-GTA08_BOTSDO01432(GTA08_BOTSDO01432);gene-GTA08_BOTSDO03402(GTA08_BOTSDO03402);gene-GTA08_BOTSDO13964(GTA08_BOTSDO13964)	gene-GTA08_BOTSDO01875(GTA08_BOTSDO01875);gene-GTA08_BOTSDO01877(GTA08_BOTSDO01877);gene-GTA08_BOTSDO02767(GTA08_BOTSDO02767);gene-GTA08_BOTSDO09766(GTA08_BOTSDO09766);gene-GTA08_BOTSDO10464(GTA08_BOTSDO10464);gene-GTA08_BOTSDO12189(GTA08_BOTSDO12189)
GO:1990748	BP	cellular detoxification	3	6	9	64	0.0286469	0.530991	gene-GTA08_BOTSDO01432(GTA08_BOTSDO01432);gene-GTA08_BOTSDO03402(GTA08_BOTSDO03402);gene-GTA08_BOTSDO13964(GTA08_BOTSDO13964)	gene-GTA08_BOTSDO01875(GTA08_BOTSDO01875);gene-GTA08_BOTSDO01877(GTA08_BOTSDO01877);gene-GTA08_BOTSDO02767(GTA08_BOTSDO02767);gene-GTA08_BOTSDO09766(GTA08_BOTSDO09766);gene-GTA08_BOTSDO10464(GTA08_BOTSDO10464);gene-GTA08_BOTSDO12189(GTA08_BOTSDO12189)
GO:0019751	BP	polyol metabolic process	0	3	3	11	0.0345811	0.618868	-	gene-GTA08_BOTSDO04147(GTA08_BOTSDO04147);gene-GTA08_BOTSDO07933(GTA08_BOTSDO07933);gene-GTA08_BOTSDO09111(GTA08_BOTSDO09111)
GO:0009636	BP	response to toxic substance	3	6	9	67	0.0372022	0.618868	gene-GTA08_BOTSDO01432(GTA08_BOTSDO01432);gene-GTA08_BOTSDO03402(GTA08_BOTSDO03402);gene-GTA08_BOTSDO13964(GTA08_BOTSDO13964)	gene-GTA08_BOTSDO01875(GTA08_BOTSDO01875);gene-GTA08_BOTSDO01877(GTA08_BOTSDO01877);gene-GTA08_BOTSDO02767(GTA08_BOTSDO02767);gene-GTA08_BOTSDO09766(GTA08_BOTSDO09766);gene-GTA08_BOTSDO10464(GTA08_BOTSDO10464);gene-GTA08_BOTSDO12189(GTA08_BOTSDO12189)
GO:0097237	BP	cellular response to toxic substance	3	6	9	67	0.0372022	0.618868	gene-GTA08_BOTSDO01432(GTA08_BOTSDO01432);gene-GTA08_BOTSDO03402(GTA08_BOTSDO03402);gene-GTA08_BOTSDO13964(GTA08_BOTSDO13964)	gene-GTA08_BOTSDO01875(GTA08_BOTSDO01875);gene-GTA08_BOTSDO01877(GTA08_BOTSDO01877);gene-GTA08_BOTSDO02767(GTA08_BOTSDO02767);gene-GTA08_BOTSDO09766(GTA08_BOTSDO09766);gene-GTA08_BOTSDO10464(GTA08_BOTSDO10464);gene-GTA08_BOTSDO12189(GTA08_BOTSDO12189)
GO:0006551	BP	leucine metabolic process	2	0	2	5	0.0405424	0.618868	gene-GTA08_BOTSDO07298(GTA08_BOTSDO07298);gene-GTA08_BOTSDO11490(GTA08_BOTSDO11490)	-
GO:0006558	BP	L-phenylalanine metabolic process	0	2	2	5	0.0405424	0.618868	-	gene-GTA08_BOTSDO00716(GTA08_BOTSDO00716);gene-GTA08_BOTSDO06534(GTA08_BOTSDO06534)
GO:1902221	BP	erythrose 4-phosphate/phosphoenolpyruvate family amino acid metabolic process	0	2	2	5	0.0405424	0.618868	-	gene-GTA08_BOTSDO00716(GTA08_BOTSDO00716);gene-GTA08_BOTSDO06534(GTA08_BOTSDO06534)
GO:0009083	BP	branched-chain amino acid catabolic process	0	2	2	6	0.0581053	0.692332	-	gene-GTA08_BOTSDO08782(GTA08_BOTSDO08782);gene-GTA08_BOTSDO13890(GTA08_BOTSDO13890)
GO:0051788	BP	response to misfolded protein	2	0	2	6	0.0581053	0.692332	gene-GTA08_BOTSDO07275(GTA08_BOTSDO07275);gene-GTA08_BOTSDO11467(GTA08_BOTSDO11467)	-
GO:0071218	BP	cellular response to misfolded protein	2	0	2	6	0.0581053	0.692332	gene-GTA08_BOTSDO07275(GTA08_BOTSDO07275);gene-GTA08_BOTSDO11467(GTA08_BOTSDO11467)	-
GO:0005976	BP	polysaccharide metabolic process	2	6	8	64	0.0682441	0.692332	gene-GTA08_BOTSDO10386(GTA08_BOTSDO10386);gene-GTA08_BOTSDO10907(GTA08_BOTSDO10907)	gene-GTA08_BOTSDO02133(GTA08_BOTSDO02133);gene-GTA08_BOTSDO02849(GTA08_BOTSDO02849);gene-GTA08_BOTSDO08820(GTA08_BOTSDO08820);gene-GTA08_BOTSDO09584(GTA08_BOTSDO09584);gene-GTA08_BOTSDO11969(GTA08_BOTSDO11969);gene-GTA08_BOTSDO13846(GTA08_BOTSDO13846)
GO:0006532	BP	aspartate biosynthetic process	1	0	1	1	0.0683115	0.692332	gene-GTA08_BOTSDO07725(GTA08_BOTSDO07725)	-
GO:0009439	BP	cyanate metabolic process	0	1	1	1	0.0683115	0.692332	-	gene-GTA08_BOTSDO08000(GTA08_BOTSDO08000)
GO:0009699	BP	phenylpropanoid biosynthetic process	0	1	1	1	0.0683115	0.692332	-	gene-GTA08_BOTSDO00716(GTA08_BOTSDO00716)
GO:0009800	BP	cinnamic acid biosynthetic process	0	1	1	1	0.0683115	0.692332	-	gene-GTA08_BOTSDO00716(GTA08_BOTSDO00716)
GO:0015743	BP	malate transport	1	0	1	1	0.0683115	0.692332	gene-GTA08_BOTSDO04858(GTA08_BOTSDO04858)	-
GO:0015750	BP	pentose transmembrane transport	0	1	1	1	0.0683115	0.692332	-	gene-GTA08_BOTSDO13953(GTA08_BOTSDO13953)
GO:0015751	BP	arabinose transmembrane transport	0	1	1	1	0.0683115	0.692332	-	gene-GTA08_BOTSDO13953(GTA08_BOTSDO13953)
GO:0015755	BP	fructose transmembrane transport	0	1	1	1	0.0683115	0.692332	-	gene-GTA08_BOTSDO13953(GTA08_BOTSDO13953)
GO:0015756	BP	fucose transmembrane transport	0	1	1	1	0.0683115	0.692332	-	gene-GTA08_BOTSDO13953(GTA08_BOTSDO13953)
GO:0015757	BP	galactose transmembrane transport	0	1	1	1	0.0683115	0.692332	-	gene-GTA08_BOTSDO13953(GTA08_BOTSDO13953)
GO:0032434	BP	regulation of proteasomal ubiquitin-dependent protein catabolic process	1	0	1	1	0.0683115	0.692332	gene-GTA08_BOTSDO00957(GTA08_BOTSDO00957)	-
GO:0032436	BP	positive regulation of proteasomal ubiquitin-dependent protein catabolic process	1	0	1	1	0.0683115	0.692332	gene-GTA08_BOTSDO00957(GTA08_BOTSDO00957)	-
GO:0071423	BP	malate transmembrane transport	1	0	1	1	0.0683115	0.692332	gene-GTA08_BOTSDO04858(GTA08_BOTSDO04858)	-
GO:0006520	BP	cellular amino acid metabolic process	5	18	23	244	0.0700893	0.692332	gene-GTA08_BOTSDO02628(GTA08_BOTSDO02628);gene-GTA08_BOTSDO06780(GTA08_BOTSDO06780);gene-GTA08_BOTSDO07298(GTA08_BOTSDO07298);gene-GTA08_BOTSDO07725(GTA08_BOTSDO07725);gene-GTA08_BOTSDO11490(GTA08_BOTSDO11490)	gene-GTA08_BOTSDO00156(GTA08_BOTSDO00156);gene-GTA08_BOTSDO00195(GTA08_BOTSDO00195);gene-GTA08_BOTSDO00716(GTA08_BOTSDO00716);gene-GTA08_BOTSDO01981(GTA08_BOTSDO01981);gene-GTA08_BOTSDO03575(GTA08_BOTSDO03575);gene-GTA08_BOTSDO04126(GTA08_BOTSDO04126);gene-GTA08_BOTSDO05479(GTA08_BOTSDO05479);gene-GTA08_BOTSDO05670(GTA08_BOTSDO05670);gene-GTA08_BOTSDO06534(GTA08_BOTSDO06534);gene-GTA08_BOTSDO0697…
GO:0042026	BP	protein refolding	2	0	2	7	0.0777467	0.692332	gene-GTA08_BOTSDO07275(GTA08_BOTSDO07275);gene-GTA08_BOTSDO11467(GTA08_BOTSDO11467)	-
GO:0009082	BP	branched-chain amino acid biosynthetic process	2	1	3	15	0.0779573	0.692332	gene-GTA08_BOTSDO07298(GTA08_BOTSDO07298);gene-GTA08_BOTSDO11490(GTA08_BOTSDO11490)	gene-GTA08_BOTSDO11714(GTA08_BOTSDO11714)
GO:0030243	BP	cellulose metabolic process	2	1	3	15	0.0779573	0.692332	gene-GTA08_BOTSDO10386(GTA08_BOTSDO10386);gene-GTA08_BOTSDO10907(GTA08_BOTSDO10907)	gene-GTA08_BOTSDO08820(GTA08_BOTSDO08820)
GO:0030245	BP	cellulose catabolic process	2	1	3	15	0.0779573	0.692332	gene-GTA08_BOTSDO10386(GTA08_BOTSDO10386);gene-GTA08_BOTSDO10907(GTA08_BOTSDO10907)	gene-GTA08_BOTSDO08820(GTA08_BOTSDO08820)
GO:0051275	BP	beta-glucan catabolic process	2	1	3	15	0.0779573	0.692332	gene-GTA08_BOTSDO10386(GTA08_BOTSDO10386);gene-GTA08_BOTSDO10907(GTA08_BOTSDO10907)	gene-GTA08_BOTSDO08820(GTA08_BOTSDO08820)
GO:0008152	BP	metabolic process	93	230	323	4551	0.0786801	0.692332	gene-GTA08_BOTSDO00147(GTA08_BOTSDO00147);gene-GTA08_BOTSDO00398(GTA08_BOTSDO00398);gene-GTA08_BOTSDO00957(GTA08_BOTSDO00957);gene-GTA08_BOTSDO01186(GTA08_BOTSDO01186);gene-GTA08_BOTSDO01194(GTA08_BOTSDO01194);gene-GTA08_BOTSDO01196(GTA08_BOTSDO01196);gene-GTA08_BOTSDO01243(GTA08_BOTSDO01243);gene-GTA08_BOTSDO01570(GTA08_BOTSDO01570);gene-GTA08_BOTSDO01631(GTA08_BOTSDO01631);gene-GTA08_BOTSDO0163…	gene-GTA08_BOTSDO00110(GTA08_BOTSDO00110);gene-GTA08_BOTSDO00156(GTA08_BOTSDO00156);gene-GTA08_BOTSDO00195(GTA08_BOTSDO00195);gene-GTA08_BOTSDO00332(GTA08_BOTSDO00332);gene-GTA08_BOTSDO00341(GTA08_BOTSDO00341);gene-GTA08_BOTSDO00371(GTA08_BOTSDO00371);gene-GTA08_BOTSDO00383(GTA08_BOTSDO00383);gene-GTA08_BOTSDO00477(GTA08_BOTSDO00477);gene-GTA08_BOTSDO00535(GTA08_BOTSDO00535);gene-GTA08_BOTSDO0055…
GO:0042737	BP	drug catabolic process	0	5	5	34	0.0787044	0.692332	-	gene-GTA08_BOTSDO00716(GTA08_BOTSDO00716);gene-GTA08_BOTSDO06534(GTA08_BOTSDO06534);gene-GTA08_BOTSDO07545(GTA08_BOTSDO07545);gene-GTA08_BOTSDO07597(GTA08_BOTSDO07597);gene-GTA08_BOTSDO12189(GTA08_BOTSDO12189)
GO:0044247	BP	cellular polysaccharide catabolic process	2	1	3	16	0.0912812	0.789583	gene-GTA08_BOTSDO10386(GTA08_BOTSDO10386);gene-GTA08_BOTSDO10907(GTA08_BOTSDO10907)	gene-GTA08_BOTSDO08820(GTA08_BOTSDO08820)
GO:0016052	BP	carbohydrate catabolic process	4	5	9	82	0.105373	0.896536	gene-GTA08_BOTSDO07018(GTA08_BOTSDO07018);gene-GTA08_BOTSDO10386(GTA08_BOTSDO10386);gene-GTA08_BOTSDO10907(GTA08_BOTSDO10907);gene-GTA08_BOTSDO11212(GTA08_BOTSDO11212)	gene-GTA08_BOTSDO02133(GTA08_BOTSDO02133);gene-GTA08_BOTSDO08820(GTA08_BOTSDO08820);gene-GTA08_BOTSDO11969(GTA08_BOTSDO11969);gene-GTA08_BOTSDO13549(GTA08_BOTSDO13549);gene-GTA08_BOTSDO13846(GTA08_BOTSDO13846)
GO:1901605	BP	alpha-amino acid metabolic process	4	10	14	144	0.113428	0.925554	gene-GTA08_BOTSDO06780(GTA08_BOTSDO06780);gene-GTA08_BOTSDO07298(GTA08_BOTSDO07298);gene-GTA08_BOTSDO07725(GTA08_BOTSDO07725);gene-GTA08_BOTSDO11490(GTA08_BOTSDO11490)	gene-GTA08_BOTSDO00716(GTA08_BOTSDO00716);gene-GTA08_BOTSDO01981(GTA08_BOTSDO01981);gene-GTA08_BOTSDO04126(GTA08_BOTSDO04126);gene-GTA08_BOTSDO05670(GTA08_BOTSDO05670);gene-GTA08_BOTSDO06534(GTA08_BOTSDO06534);gene-GTA08_BOTSDO08260(GTA08_BOTSDO08260);gene-GTA08_BOTSDO08782(GTA08_BOTSDO08782);gene-GTA08_BOTSDO09511(GTA08_BOTSDO09511);gene-GTA08_BOTSDO11986(GTA08_BOTSDO11986);gene-GTA08_BOTSDO1389…
GO:0009251	BP	glucan catabolic process	2	1	3	18	0.120464	0.925554	gene-GTA08_BOTSDO10386(GTA08_BOTSDO10386);gene-GTA08_BOTSDO10907(GTA08_BOTSDO10907)	gene-GTA08_BOTSDO08820(GTA08_BOTSDO08820)
GO:0035967	BP	cellular response to topologically incorrect protein	2	0	2	9	0.121847	0.925554	gene-GTA08_BOTSDO07275(GTA08_BOTSDO07275);gene-GTA08_BOTSDO11467(GTA08_BOTSDO11467)	-
GO:0000272	BP	polysaccharide catabolic process	2	4	6	50	0.12329	0.925554	gene-GTA08_BOTSDO10386(GTA08_BOTSDO10386);gene-GTA08_BOTSDO10907(GTA08_BOTSDO10907)	gene-GTA08_BOTSDO02133(GTA08_BOTSDO02133);gene-GTA08_BOTSDO08820(GTA08_BOTSDO08820);gene-GTA08_BOTSDO11969(GTA08_BOTSDO11969);gene-GTA08_BOTSDO13846(GTA08_BOTSDO13846)
GO:0006979	BP	response to oxidative stress	2	4	6	50	0.12329	0.925554	gene-GTA08_BOTSDO03402(GTA08_BOTSDO03402);gene-GTA08_BOTSDO13964(GTA08_BOTSDO13964)	gene-GTA08_BOTSDO02767(GTA08_BOTSDO02767);gene-GTA08_BOTSDO09766(GTA08_BOTSDO09766);gene-GTA08_BOTSDO10464(GTA08_BOTSDO10464);gene-GTA08_BOTSDO12189(GTA08_BOTSDO12189)
GO:0006102	BP	isocitrate metabolic process	1	0	1	2	0.131967	0.925554	gene-GTA08_BOTSDO11021(GTA08_BOTSDO11021)	-
GO:0006531	BP	aspartate metabolic process	1	0	1	2	0.131967	0.925554	gene-GTA08_BOTSDO07725(GTA08_BOTSDO07725)	-
GO:0006582	BP	melanin metabolic process	0	1	1	2	0.131967	0.925554	-	gene-GTA08_BOTSDO09837(GTA08_BOTSDO09837)
GO:0010133	BP	proline catabolic process to glutamate	1	0	1	2	0.131967	0.925554	gene-GTA08_BOTSDO06780(GTA08_BOTSDO06780)	-
GO:0015740	BP	C4-dicarboxylate transport	1	0	1	2	0.131967	0.925554	gene-GTA08_BOTSDO04858(GTA08_BOTSDO04858)	-
GO:0042438	BP	melanin biosynthetic process	0	1	1	2	0.131967	0.925554	-	gene-GTA08_BOTSDO09837(GTA08_BOTSDO09837)
GO:0072350	BP	tricarboxylic acid metabolic process	1	0	1	2	0.131967	0.925554	gene-GTA08_BOTSDO11021(GTA08_BOTSDO11021)	-
GO:2000060	BP	positive regulation of ubiquitin-dependent protein catabolic process	1	0	1	2	0.131967	0.925554	gene-GTA08_BOTSDO00957(GTA08_BOTSDO00957)	-
GO:0008299	BP	isoprenoid biosynthetic process	3	0	3	20	0.152552	0.995748	gene-GTA08_BOTSDO01186(GTA08_BOTSDO01186);gene-GTA08_BOTSDO09619(GTA08_BOTSDO09619);gene-GTA08_BOTSDO14217(GTA08_BOTSDO14217)	-
GO:0044275	BP	cellular carbohydrate catabolic process	2	1	3	20	0.152552	0.995748	gene-GTA08_BOTSDO10386(GTA08_BOTSDO10386);gene-GTA08_BOTSDO10907(GTA08_BOTSDO10907)	gene-GTA08_BOTSDO08820(GTA08_BOTSDO08820)
GO:0051273	BP	beta-glucan metabolic process	2	1	3	20	0.152552	0.995748	gene-GTA08_BOTSDO10386(GTA08_BOTSDO10386);gene-GTA08_BOTSDO10907(GTA08_BOTSDO10907)	gene-GTA08_BOTSDO08820(GTA08_BOTSDO08820)
GO:0044262	BP	cellular carbohydrate metabolic process	2	5	7	65	0.153179	0.995748	gene-GTA08_BOTSDO10386(GTA08_BOTSDO10386);gene-GTA08_BOTSDO10907(GTA08_BOTSDO10907)	gene-GTA08_BOTSDO02133(GTA08_BOTSDO02133);gene-GTA08_BOTSDO04147(GTA08_BOTSDO04147);gene-GTA08_BOTSDO07933(GTA08_BOTSDO07933);gene-GTA08_BOTSDO08820(GTA08_BOTSDO08820);gene-GTA08_BOTSDO09111(GTA08_BOTSDO09111)
GO:0044264	BP	cellular polysaccharide metabolic process	2	2	4	31	0.158092	0.995748	gene-GTA08_BOTSDO10386(GTA08_BOTSDO10386);gene-GTA08_BOTSDO10907(GTA08_BOTSDO10907)	gene-GTA08_BOTSDO02133(GTA08_BOTSDO02133);gene-GTA08_BOTSDO08820(GTA08_BOTSDO08820)
GO:0017001	BP	antibiotic catabolic process	0	2	2	11	0.170385	0.995748	-	gene-GTA08_BOTSDO07597(GTA08_BOTSDO07597);gene-GTA08_BOTSDO12189(GTA08_BOTSDO12189)
GO:0046165	BP	alcohol biosynthetic process	0	2	2	11	0.170385	0.995748	-	gene-GTA08_BOTSDO08782(GTA08_BOTSDO08782);gene-GTA08_BOTSDO13890(GTA08_BOTSDO13890)
GO:0006720	BP	isoprenoid metabolic process	3	0	3	22	0.186968	0.995748	gene-GTA08_BOTSDO01186(GTA08_BOTSDO01186);gene-GTA08_BOTSDO09619(GTA08_BOTSDO09619);gene-GTA08_BOTSDO14217(GTA08_BOTSDO14217)	-
GO:0006082	BP	organic acid metabolic process	9	22	31	385	0.188384	0.995748	gene-GTA08_BOTSDO02628(GTA08_BOTSDO02628);gene-GTA08_BOTSDO04508(GTA08_BOTSDO04508);gene-GTA08_BOTSDO06780(GTA08_BOTSDO06780);gene-GTA08_BOTSDO07298(GTA08_BOTSDO07298);gene-GTA08_BOTSDO07725(GTA08_BOTSDO07725);gene-GTA08_BOTSDO08520(GTA08_BOTSDO08520);gene-GTA08_BOTSDO11021(GTA08_BOTSDO11021);gene-GTA08_BOTSDO11135(GTA08_BOTSDO11135);gene-GTA08_BOTSDO11490(GTA08_BOTSDO11490)	gene-GTA08_BOTSDO00156(GTA08_BOTSDO00156);gene-GTA08_BOTSDO00195(GTA08_BOTSDO00195);gene-GTA08_BOTSDO00716(GTA08_BOTSDO00716);gene-GTA08_BOTSDO01981(GTA08_BOTSDO01981);gene-GTA08_BOTSDO03575(GTA08_BOTSDO03575);gene-GTA08_BOTSDO04126(GTA08_BOTSDO04126);gene-GTA08_BOTSDO05378(GTA08_BOTSDO05378);gene-GTA08_BOTSDO05479(GTA08_BOTSDO05479);gene-GTA08_BOTSDO05670(GTA08_BOTSDO05670);gene-GTA08_BOTSDO0568…
GO:0006508	BP	proteolysis	6	19	25	304	0.189642	0.995748	gene-GTA08_BOTSDO00147(GTA08_BOTSDO00147);gene-GTA08_BOTSDO00957(GTA08_BOTSDO00957);gene-GTA08_BOTSDO02702(GTA08_BOTSDO02702);gene-GTA08_BOTSDO07349(GTA08_BOTSDO07349);gene-GTA08_BOTSDO08711(GTA08_BOTSDO08711);gene-GTA08_BOTSDO09315(GTA08_BOTSDO09315)	gene-GTA08_BOTSDO00884(GTA08_BOTSDO00884);gene-GTA08_BOTSDO01758(GTA08_BOTSDO01758);gene-GTA08_BOTSDO01970(GTA08_BOTSDO01970);gene-GTA08_BOTSDO02339(GTA08_BOTSDO02339);gene-GTA08_BOTSDO03475(GTA08_BOTSDO03475);gene-GTA08_BOTSDO03981(GTA08_BOTSDO03981);gene-GTA08_BOTSDO04544(GTA08_BOTSDO04544);gene-GTA08_BOTSDO05396(GTA08_BOTSDO05396);gene-GTA08_BOTSDO07307(GTA08_BOTSDO07307);gene-GTA08_BOTSDO0755…
GO:0006672	BP	ceramide metabolic process	1	0	1	3	0.191284	0.995748	gene-GTA08_BOTSDO03811(GTA08_BOTSDO03811)	-
GO:0007166	BP	cell surface receptor signaling pathway	0	1	1	3	0.191284	0.995748	-	gene-GTA08_BOTSDO04606(GTA08_BOTSDO04606)
GO:0008645	BP	hexose transmembrane transport	0	1	1	3	0.191284	0.995748	-	gene-GTA08_BOTSDO13953(GTA08_BOTSDO13953)
GO:0009264	BP	deoxyribonucleotide catabolic process	0	1	1	3	0.191284	0.995748	-	gene-GTA08_BOTSDO02221(GTA08_BOTSDO02221)
GO:0009698	BP	phenylpropanoid metabolic process	0	1	1	3	0.191284	0.995748	-	gene-GTA08_BOTSDO00716(GTA08_BOTSDO00716)
GO:0009803	BP	cinnamic acid metabolic process	0	1	1	3	0.191284	0.995748	-	gene-GTA08_BOTSDO00716(GTA08_BOTSDO00716)
GO:0015749	BP	monosaccharide transmembrane transport	0	1	1	3	0.191284	0.995748	-	gene-GTA08_BOTSDO13953(GTA08_BOTSDO13953)
GO:0019541	BP	propionate metabolic process	0	1	1	3	0.191284	0.995748	-	gene-GTA08_BOTSDO07597(GTA08_BOTSDO07597)
GO:0019543	BP	propionate catabolic process	0	1	1	3	0.191284	0.995748	-	gene-GTA08_BOTSDO07597(GTA08_BOTSDO07597)
GO:0019626	BP	short-chain fatty acid catabolic process	0	1	1	3	0.191284	0.995748	-	gene-GTA08_BOTSDO07597(GTA08_BOTSDO07597)
GO:0019629	BP	propionate catabolic process, 2-methylcitrate cycle	0	1	1	3	0.191284	0.995748	-	gene-GTA08_BOTSDO07597(GTA08_BOTSDO07597)
GO:0034219	BP	carbohydrate transmembrane transport	0	1	1	3	0.191284	0.995748	-	gene-GTA08_BOTSDO13953(GTA08_BOTSDO13953)
GO:0046189	BP	phenol-containing compound biosynthetic process	0	1	1	3	0.191284	0.995748	-	gene-GTA08_BOTSDO09837(GTA08_BOTSDO09837)
GO:1901800	BP	positive regulation of proteasomal protein catabolic process	1	0	1	3	0.191284	0.995748	gene-GTA08_BOTSDO00957(GTA08_BOTSDO00957)	-
GO:2000058	BP	regulation of ubiquitin-dependent protein catabolic process	1	0	1	3	0.191284	0.995748	gene-GTA08_BOTSDO00957(GTA08_BOTSDO00957)	-
GO:0006536	BP	glutamate metabolic process	1	1	2	12	0.195696	0.995748	gene-GTA08_BOTSDO06780(GTA08_BOTSDO06780)	gene-GTA08_BOTSDO09511(GTA08_BOTSDO09511)
GO:0006560	BP	proline metabolic process	1	1	2	12	0.195696	0.995748	gene-GTA08_BOTSDO06780(GTA08_BOTSDO06780)	gene-GTA08_BOTSDO09511(GTA08_BOTSDO09511)
GO:0035966	BP	response to topologically incorrect protein	2	0	2	12	0.195696	0.995748	gene-GTA08_BOTSDO07275(GTA08_BOTSDO07275);gene-GTA08_BOTSDO11467(GTA08_BOTSDO11467)	-
GO:1901617	BP	organic hydroxy compound biosynthetic process	0	3	3	23	0.204869	1	-	gene-GTA08_BOTSDO08782(GTA08_BOTSDO08782);gene-GTA08_BOTSDO09837(GTA08_BOTSDO09837);gene-GTA08_BOTSDO13890(GTA08_BOTSDO13890)
GO:0000271	BP	polysaccharide biosynthetic process	0	2	2	13	0.221427	1	-	gene-GTA08_BOTSDO02849(GTA08_BOTSDO02849);gene-GTA08_BOTSDO09584(GTA08_BOTSDO09584)
GO:0044550	BP	secondary metabolite biosynthetic process	0	2	2	13	0.221427	1	-	gene-GTA08_BOTSDO00716(GTA08_BOTSDO00716);gene-GTA08_BOTSDO09837(GTA08_BOTSDO09837)
GO:0072593	BP	reactive oxygen species metabolic process	0	2	2	13	0.221427	1	-	gene-GTA08_BOTSDO05477(GTA08_BOTSDO05477);gene-GTA08_BOTSDO12189(GTA08_BOTSDO12189)
GO:0006073	BP	cellular glucan metabolic process	2	1	3	25	0.241716	1	gene-GTA08_BOTSDO10386(GTA08_BOTSDO10386);gene-GTA08_BOTSDO10907(GTA08_BOTSDO10907)	gene-GTA08_BOTSDO08820(GTA08_BOTSDO08820)
GO:0006570	BP	tyrosine metabolic process	0	1	1	4	0.246556	1	-	gene-GTA08_BOTSDO06534(GTA08_BOTSDO06534)
GO:0007155	BP	cell adhesion	0	1	1	4	0.246556	1	-	gene-GTA08_BOTSDO09766(GTA08_BOTSDO09766)
GO:0022610	BP	biological adhesion	0	1	1	4	0.246556	1	-	gene-GTA08_BOTSDO09766(GTA08_BOTSDO09766)
GO:0033621	BP	nuclear-transcribed mRNA catabolic process, meiosis-specific transcripts	0	1	1	4	0.246556	1	-	gene-GTA08_BOTSDO11445(GTA08_BOTSDO11445)
GO:0043629	BP	ncRNA polyadenylation	0	1	1	4	0.246556	1	-	gene-GTA08_BOTSDO11445(GTA08_BOTSDO11445)
GO:0046459	BP	short-chain fatty acid metabolic process	0	1	1	4	0.246556	1	-	gene-GTA08_BOTSDO07597(GTA08_BOTSDO07597)
GO:0071050	BP	snoRNA polyadenylation	0	1	1	4	0.246556	1	-	gene-GTA08_BOTSDO11445(GTA08_BOTSDO11445)
GO:1903052	BP	positive regulation of proteolysis involved in cellular protein catabolic process	1	0	1	4	0.246556	1	gene-GTA08_BOTSDO00957(GTA08_BOTSDO00957)	-
GO:1903364	BP	positive regulation of cellular protein catabolic process	1	0	1	4	0.246556	1	gene-GTA08_BOTSDO00957(GTA08_BOTSDO00957)	-
GO:0016999	BP	antibiotic metabolic process	0	2	2	14	0.247404	1	-	gene-GTA08_BOTSDO07597(GTA08_BOTSDO07597);gene-GTA08_BOTSDO12189(GTA08_BOTSDO12189)
GO:0006813	BP	potassium ion transport	0	2	2	15	0.273473	1	-	gene-GTA08_BOTSDO00662(GTA08_BOTSDO00662);gene-GTA08_BOTSDO08625(GTA08_BOTSDO08625)
GO:0019748	BP	secondary metabolic process	0	2	2	15	0.273473	1	-	gene-GTA08_BOTSDO00716(GTA08_BOTSDO00716);gene-GTA08_BOTSDO09837(GTA08_BOTSDO09837)
GO:0071805	BP	potassium ion transmembrane transport	0	2	2	15	0.273473	1	-	gene-GTA08_BOTSDO00662(GTA08_BOTSDO00662);gene-GTA08_BOTSDO08625(GTA08_BOTSDO08625)
GO:0044042	BP	glucan metabolic process	2	1	3	27	0.279527	1	gene-GTA08_BOTSDO10386(GTA08_BOTSDO10386);gene-GTA08_BOTSDO10907(GTA08_BOTSDO10907)	gene-GTA08_BOTSDO08820(GTA08_BOTSDO08820)
GO:0043436	BP	oxoacid metabolic process	8	21	29	380	0.290177	1	gene-GTA08_BOTSDO02628(GTA08_BOTSDO02628);gene-GTA08_BOTSDO04508(GTA08_BOTSDO04508);gene-GTA08_BOTSDO06780(GTA08_BOTSDO06780);gene-GTA08_BOTSDO07298(GTA08_BOTSDO07298);gene-GTA08_BOTSDO07725(GTA08_BOTSDO07725);gene-GTA08_BOTSDO08520(GTA08_BOTSDO08520);gene-GTA08_BOTSDO11021(GTA08_BOTSDO11021);gene-GTA08_BOTSDO11490(GTA08_BOTSDO11490)	gene-GTA08_BOTSDO00156(GTA08_BOTSDO00156);gene-GTA08_BOTSDO00195(GTA08_BOTSDO00195);gene-GTA08_BOTSDO00716(GTA08_BOTSDO00716);gene-GTA08_BOTSDO01981(GTA08_BOTSDO01981);gene-GTA08_BOTSDO03575(GTA08_BOTSDO03575);gene-GTA08_BOTSDO04126(GTA08_BOTSDO04126);gene-GTA08_BOTSDO05378(GTA08_BOTSDO05378);gene-GTA08_BOTSDO05479(GTA08_BOTSDO05479);gene-GTA08_BOTSDO05670(GTA08_BOTSDO05670);gene-GTA08_BOTSDO0568…
GO:0019752	BP	carboxylic acid metabolic process	8	20	28	367	0.295107	1	gene-GTA08_BOTSDO02628(GTA08_BOTSDO02628);gene-GTA08_BOTSDO04508(GTA08_BOTSDO04508);gene-GTA08_BOTSDO06780(GTA08_BOTSDO06780);gene-GTA08_BOTSDO07298(GTA08_BOTSDO07298);gene-GTA08_BOTSDO07725(GTA08_BOTSDO07725);gene-GTA08_BOTSDO08520(GTA08_BOTSDO08520);gene-GTA08_BOTSDO11021(GTA08_BOTSDO11021);gene-GTA08_BOTSDO11490(GTA08_BOTSDO11490)	gene-GTA08_BOTSDO00156(GTA08_BOTSDO00156);gene-GTA08_BOTSDO00195(GTA08_BOTSDO00195);gene-GTA08_BOTSDO00716(GTA08_BOTSDO00716);gene-GTA08_BOTSDO01981(GTA08_BOTSDO01981);gene-GTA08_BOTSDO03575(GTA08_BOTSDO03575);gene-GTA08_BOTSDO04126(GTA08_BOTSDO04126);gene-GTA08_BOTSDO05479(GTA08_BOTSDO05479);gene-GTA08_BOTSDO05670(GTA08_BOTSDO05670);gene-GTA08_BOTSDO05680(GTA08_BOTSDO05680);gene-GTA08_BOTSDO0653…
GO:0006537	BP	glutamate biosynthetic process	0	1	1	5	0.29806	1	-	gene-GTA08_BOTSDO09511(GTA08_BOTSDO09511)
GO:0006564	BP	L-serine biosynthetic process	0	1	1	5	0.29806	1	-	gene-GTA08_BOTSDO11986(GTA08_BOTSDO11986)
GO:0006835	BP	dicarboxylic acid transport	1	0	1	5	0.29806	1	gene-GTA08_BOTSDO04858(GTA08_BOTSDO04858)	-
GO:0010410	BP	hemicellulose metabolic process	0	1	1	5	0.29806	1	-	gene-GTA08_BOTSDO02133(GTA08_BOTSDO02133)
GO:0042744	BP	hydrogen peroxide catabolic process	0	1	1	5	0.29806	1	-	gene-GTA08_BOTSDO12189(GTA08_BOTSDO12189)
GO:0044347	BP	cell wall polysaccharide catabolic process	0	1	1	5	0.29806	1	-	gene-GTA08_BOTSDO02133(GTA08_BOTSDO02133)
GO:0045491	BP	xylan metabolic process	0	1	1	5	0.29806	1	-	gene-GTA08_BOTSDO02133(GTA08_BOTSDO02133)
GO:0045493	BP	xylan catabolic process	0	1	1	5	0.29806	1	-	gene-GTA08_BOTSDO02133(GTA08_BOTSDO02133)
GO:0045732	BP	positive regulation of protein catabolic process	1	0	1	5	0.29806	1	gene-GTA08_BOTSDO00957(GTA08_BOTSDO00957)	-
GO:0061136	BP	regulation of proteasomal protein catabolic process	1	0	1	5	0.29806	1	gene-GTA08_BOTSDO00957(GTA08_BOTSDO00957)	-
GO:0042537	BP	benzene-containing compound metabolic process	0	2	2	16	0.2995	1	-	gene-GTA08_BOTSDO00716(GTA08_BOTSDO00716);gene-GTA08_BOTSDO05670(GTA08_BOTSDO05670)
GO:0006562	BP	proline catabolic process	1	0	1	6	0.346051	1	gene-GTA08_BOTSDO06780(GTA08_BOTSDO06780)	-
GO:0006801	BP	superoxide metabolic process	0	1	1	6	0.346051	1	-	gene-GTA08_BOTSDO05477(GTA08_BOTSDO05477)
GO:0008361	BP	regulation of cell size	1	0	1	6	0.346051	1	gene-GTA08_BOTSDO06692(GTA08_BOTSDO06692)	-
GO:0009262	BP	deoxyribonucleotide metabolic process	0	1	1	6	0.346051	1	-	gene-GTA08_BOTSDO02221(GTA08_BOTSDO02221)
GO:0042743	BP	hydrogen peroxide metabolic process	0	1	1	6	0.346051	1	-	gene-GTA08_BOTSDO12189(GTA08_BOTSDO12189)
GO:1901607	BP	alpha-amino acid biosynthetic process	3	4	7	84	0.349756	1	gene-GTA08_BOTSDO07298(GTA08_BOTSDO07298);gene-GTA08_BOTSDO07725(GTA08_BOTSDO07725);gene-GTA08_BOTSDO11490(GTA08_BOTSDO11490)	gene-GTA08_BOTSDO04126(GTA08_BOTSDO04126);gene-GTA08_BOTSDO08260(GTA08_BOTSDO08260);gene-GTA08_BOTSDO09511(GTA08_BOTSDO09511);gene-GTA08_BOTSDO11986(GTA08_BOTSDO11986)
GO:0006006	BP	glucose metabolic process	2	0	2	18	0.350984	1	gene-GTA08_BOTSDO07018(GTA08_BOTSDO07018);gene-GTA08_BOTSDO11212(GTA08_BOTSDO11212)	-
GO:0070887	BP	cellular response to chemical stimulus	5	6	11	141	0.368634	1	gene-GTA08_BOTSDO01432(GTA08_BOTSDO01432);gene-GTA08_BOTSDO03402(GTA08_BOTSDO03402);gene-GTA08_BOTSDO07275(GTA08_BOTSDO07275);gene-GTA08_BOTSDO11467(GTA08_BOTSDO11467);gene-GTA08_BOTSDO13964(GTA08_BOTSDO13964)	gene-GTA08_BOTSDO01875(GTA08_BOTSDO01875);gene-GTA08_BOTSDO01877(GTA08_BOTSDO01877);gene-GTA08_BOTSDO02767(GTA08_BOTSDO02767);gene-GTA08_BOTSDO09766(GTA08_BOTSDO09766);gene-GTA08_BOTSDO10464(GTA08_BOTSDO10464);gene-GTA08_BOTSDO12189(GTA08_BOTSDO12189)
GO:0006026	BP	aminoglycan catabolic process	0	1	1	7	0.390768	1	-	gene-GTA08_BOTSDO07545(GTA08_BOTSDO07545)
GO:0006032	BP	chitin catabolic process	0	1	1	7	0.390768	1	-	gene-GTA08_BOTSDO07545(GTA08_BOTSDO07545)
GO:0006817	BP	phosphate ion transport	0	1	1	7	0.390768	1	-	gene-GTA08_BOTSDO05514(GTA08_BOTSDO05514)
GO:0009166	BP	nucleotide catabolic process	0	1	1	7	0.390768	1	-	gene-GTA08_BOTSDO02221(GTA08_BOTSDO02221)
GO:0019441	BP	tryptophan catabolic process to kynurenine	0	1	1	7	0.390768	1	-	gene-GTA08_BOTSDO05670(GTA08_BOTSDO05670)
GO:0042126	BP	nitrate metabolic process	0	1	1	7	0.390768	1	-	gene-GTA08_BOTSDO05378(GTA08_BOTSDO05378)
GO:0042128	BP	nitrate assimilation	0	1	1	7	0.390768	1	-	gene-GTA08_BOTSDO05378(GTA08_BOTSDO05378)
GO:0046348	BP	amino sugar catabolic process	0	1	1	7	0.390768	1	-	gene-GTA08_BOTSDO07545(GTA08_BOTSDO07545)
GO:0070914	BP	UV-damage excision repair	1	0	1	7	0.390768	1	gene-GTA08_BOTSDO07779(GTA08_BOTSDO07779)	-
GO:1901072	BP	glucosamine-containing compound catabolic process	0	1	1	7	0.390768	1	-	gene-GTA08_BOTSDO07545(GTA08_BOTSDO07545)
GO:1903050	BP	regulation of proteolysis involved in cellular protein catabolic process	1	0	1	7	0.390768	1	gene-GTA08_BOTSDO00957(GTA08_BOTSDO00957)	-
GO:1903362	BP	regulation of cellular protein catabolic process	1	0	1	7	0.390768	1	gene-GTA08_BOTSDO00957(GTA08_BOTSDO00957)	-
GO:2001057	BP	reactive nitrogen species metabolic process	0	1	1	7	0.390768	1	-	gene-GTA08_BOTSDO05378(GTA08_BOTSDO05378)
GO:0008652	BP	cellular amino acid biosynthetic process	3	5	8	103	0.406748	1	gene-GTA08_BOTSDO07298(GTA08_BOTSDO07298);gene-GTA08_BOTSDO07725(GTA08_BOTSDO07725);gene-GTA08_BOTSDO11490(GTA08_BOTSDO11490)	gene-GTA08_BOTSDO04126(GTA08_BOTSDO04126);gene-GTA08_BOTSDO08260(GTA08_BOTSDO08260);gene-GTA08_BOTSDO09511(GTA08_BOTSDO09511);gene-GTA08_BOTSDO11714(GTA08_BOTSDO11714);gene-GTA08_BOTSDO11986(GTA08_BOTSDO11986)
GO:1901361	BP	organic cyclic compound catabolic process	1	7	8	104	0.417382	1	gene-GTA08_BOTSDO06780(GTA08_BOTSDO06780)	gene-GTA08_BOTSDO00716(GTA08_BOTSDO00716);gene-GTA08_BOTSDO02221(GTA08_BOTSDO02221);gene-GTA08_BOTSDO05670(GTA08_BOTSDO05670);gene-GTA08_BOTSDO06534(GTA08_BOTSDO06534);gene-GTA08_BOTSDO08782(GTA08_BOTSDO08782);gene-GTA08_BOTSDO11445(GTA08_BOTSDO11445);gene-GTA08_BOTSDO13890(GTA08_BOTSDO13890)
GO:0000105	BP	histidine biosynthetic process	0	1	1	8	0.432434	1	-	gene-GTA08_BOTSDO04126(GTA08_BOTSDO04126)
GO:0006072	BP	glycerol-3-phosphate metabolic process	0	1	1	8	0.432434	1	-	gene-GTA08_BOTSDO13610(GTA08_BOTSDO13610)
GO:0006547	BP	histidine metabolic process	0	1	1	8	0.432434	1	-	gene-GTA08_BOTSDO04126(GTA08_BOTSDO04126)
GO:0006561	BP	proline biosynthetic process	0	1	1	8	0.432434	1	-	gene-GTA08_BOTSDO09511(GTA08_BOTSDO09511)
GO:0006656	BP	phosphatidylcholine biosynthetic process	0	1	1	8	0.432434	1	-	gene-GTA08_BOTSDO01769(GTA08_BOTSDO01769)
GO:0009062	BP	fatty acid catabolic process	0	1	1	8	0.432434	1	-	gene-GTA08_BOTSDO07597(GTA08_BOTSDO07597)
GO:0009065	BP	glutamine family amino acid catabolic process	1	0	1	8	0.432434	1	gene-GTA08_BOTSDO06780(GTA08_BOTSDO06780)	-
GO:0010383	BP	cell wall polysaccharide metabolic process	0	1	1	8	0.432434	1	-	gene-GTA08_BOTSDO02133(GTA08_BOTSDO02133)
GO:0036003	BP	positive regulation of transcription from RNA polymerase II promoter in response to stress	1	0	1	8	0.432434	1	gene-GTA08_BOTSDO00957(GTA08_BOTSDO00957)	-
GO:0045862	BP	positive regulation of proteolysis	1	0	1	8	0.432434	1	gene-GTA08_BOTSDO00957(GTA08_BOTSDO00957)	-
GO:0051187	BP	cofactor catabolic process	0	1	1	8	0.432434	1	-	gene-GTA08_BOTSDO12189(GTA08_BOTSDO12189)
GO:0052646	BP	alditol phosphate metabolic process	0	1	1	8	0.432434	1	-	gene-GTA08_BOTSDO13610(GTA08_BOTSDO13610)
GO:0052803	BP	imidazole-containing compound metabolic process	0	1	1	8	0.432434	1	-	gene-GTA08_BOTSDO04126(GTA08_BOTSDO04126)
GO:1901292	BP	nucleoside phosphate catabolic process	0	1	1	8	0.432434	1	-	gene-GTA08_BOTSDO02221(GTA08_BOTSDO02221)
GO:1902652	BP	secondary alcohol metabolic process	1	0	1	8	0.432434	1	gene-GTA08_BOTSDO11021(GTA08_BOTSDO11021)	-
GO:0006099	BP	tricarboxylic acid cycle	1	1	2	22	0.449342	1	gene-GTA08_BOTSDO11021(GTA08_BOTSDO11021)	gene-GTA08_BOTSDO07597(GTA08_BOTSDO07597)
GO:0043650	BP	dicarboxylic acid biosynthetic process	1	1	2	22	0.449342	1	gene-GTA08_BOTSDO07725(GTA08_BOTSDO07725)	gene-GTA08_BOTSDO09511(GTA08_BOTSDO09511)
GO:1901136	BP	carbohydrate derivative catabolic process	0	2	2	22	0.449342	1	-	gene-GTA08_BOTSDO02221(GTA08_BOTSDO02221);gene-GTA08_BOTSDO07545(GTA08_BOTSDO07545)
GO:0009308	BP	amine metabolic process	0	3	3	36	0.450178	1	-	gene-GTA08_BOTSDO01717(GTA08_BOTSDO01717);gene-GTA08_BOTSDO05670(GTA08_BOTSDO05670);gene-GTA08_BOTSDO09755(GTA08_BOTSDO09755)
GO:1901575	BP	organic substance catabolic process	7	19	26	369	0.464437	1	gene-GTA08_BOTSDO00957(GTA08_BOTSDO00957);gene-GTA08_BOTSDO06780(GTA08_BOTSDO06780);gene-GTA08_BOTSDO07018(GTA08_BOTSDO07018);gene-GTA08_BOTSDO07350(GTA08_BOTSDO07350);gene-GTA08_BOTSDO10386(GTA08_BOTSDO10386);gene-GTA08_BOTSDO10907(GTA08_BOTSDO10907);gene-GTA08_BOTSDO11212(GTA08_BOTSDO11212)	gene-GTA08_BOTSDO00156(GTA08_BOTSDO00156);gene-GTA08_BOTSDO00332(GTA08_BOTSDO00332);gene-GTA08_BOTSDO00716(GTA08_BOTSDO00716);gene-GTA08_BOTSDO02133(GTA08_BOTSDO02133);gene-GTA08_BOTSDO02221(GTA08_BOTSDO02221);gene-GTA08_BOTSDO03575(GTA08_BOTSDO03575);gene-GTA08_BOTSDO05670(GTA08_BOTSDO05670);gene-GTA08_BOTSDO06534(GTA08_BOTSDO06534);gene-GTA08_BOTSDO07545(GTA08_BOTSDO07545);gene-GTA08_BOTSDO0759…
GO:0016998	BP	cell wall macromolecule catabolic process	0	1	1	9	0.471258	1	-	gene-GTA08_BOTSDO02133(GTA08_BOTSDO02133)
GO:0018958	BP	phenol-containing compound metabolic process	0	1	1	9	0.471258	1	-	gene-GTA08_BOTSDO09837(GTA08_BOTSDO09837)
GO:0046470	BP	phosphatidylcholine metabolic process	0	1	1	9	0.471258	1	-	gene-GTA08_BOTSDO01769(GTA08_BOTSDO01769)
GO:0015698	BP	inorganic anion transport	0	2	2	24	0.495306	1	-	gene-GTA08_BOTSDO05514(GTA08_BOTSDO05514);gene-GTA08_BOTSDO09892(GTA08_BOTSDO09892)
GO:0006085	BP	acetyl-CoA biosynthetic process	1	0	1	10	0.507432	1	gene-GTA08_BOTSDO11135(GTA08_BOTSDO11135)	-
GO:0006563	BP	L-serine metabolic process	0	1	1	10	0.507432	1	-	gene-GTA08_BOTSDO11986(GTA08_BOTSDO11986)
GO:0009411	BP	response to UV	1	0	1	10	0.507432	1	gene-GTA08_BOTSDO07779(GTA08_BOTSDO07779)	-
GO:0034644	BP	cellular response to UV	1	0	1	10	0.507432	1	gene-GTA08_BOTSDO07779(GTA08_BOTSDO07779)	-
GO:0035384	BP	thioester biosynthetic process	1	0	1	10	0.507432	1	gene-GTA08_BOTSDO11135(GTA08_BOTSDO11135)	-
GO:0070189	BP	kynurenine metabolic process	0	1	1	10	0.507432	1	-	gene-GTA08_BOTSDO05670(GTA08_BOTSDO05670)
GO:0071478	BP	cellular response to radiation	1	0	1	10	0.507432	1	gene-GTA08_BOTSDO07779(GTA08_BOTSDO07779)	-
GO:0071482	BP	cellular response to light stimulus	1	0	1	10	0.507432	1	gene-GTA08_BOTSDO07779(GTA08_BOTSDO07779)	-
GO:0071616	BP	acyl-CoA biosynthetic process	1	0	1	10	0.507432	1	gene-GTA08_BOTSDO11135(GTA08_BOTSDO11135)	-
GO:0019439	BP	aromatic compound catabolic process	0	7	7	98	0.508495	1	-	gene-GTA08_BOTSDO00716(GTA08_BOTSDO00716);gene-GTA08_BOTSDO02221(GTA08_BOTSDO02221);gene-GTA08_BOTSDO05670(GTA08_BOTSDO05670);gene-GTA08_BOTSDO06534(GTA08_BOTSDO06534);gene-GTA08_BOTSDO08782(GTA08_BOTSDO08782);gene-GTA08_BOTSDO11445(GTA08_BOTSDO11445);gene-GTA08_BOTSDO13890(GTA08_BOTSDO13890)
GO:0006569	BP	tryptophan catabolic process	0	1	1	11	0.541136	1	-	gene-GTA08_BOTSDO05670(GTA08_BOTSDO05670)
GO:0009416	BP	response to light stimulus	1	0	1	11	0.541136	1	gene-GTA08_BOTSDO07779(GTA08_BOTSDO07779)	-
GO:0031126	BP	snoRNA 3'-end processing	0	1	1	11	0.541136	1	-	gene-GTA08_BOTSDO11445(GTA08_BOTSDO11445)
GO:0042402	BP	cellular biogenic amine catabolic process	0	1	1	11	0.541136	1	-	gene-GTA08_BOTSDO05670(GTA08_BOTSDO05670)
GO:0042436	BP	indole-containing compound catabolic process	0	1	1	11	0.541136	1	-	gene-GTA08_BOTSDO05670(GTA08_BOTSDO05670)
GO:0046218	BP	indolalkylamine catabolic process	0	1	1	11	0.541136	1	-	gene-GTA08_BOTSDO05670(GTA08_BOTSDO05670)
GO:1901565	BP	organonitrogen compound catabolic process	2	10	12	179	0.571141	1	gene-GTA08_BOTSDO00957(GTA08_BOTSDO00957);gene-GTA08_BOTSDO06780(GTA08_BOTSDO06780)	gene-GTA08_BOTSDO00156(GTA08_BOTSDO00156);gene-GTA08_BOTSDO00716(GTA08_BOTSDO00716);gene-GTA08_BOTSDO03575(GTA08_BOTSDO03575);gene-GTA08_BOTSDO05670(GTA08_BOTSDO05670);gene-GTA08_BOTSDO06534(GTA08_BOTSDO06534);gene-GTA08_BOTSDO07545(GTA08_BOTSDO07545);gene-GTA08_BOTSDO08733(GTA08_BOTSDO08733);gene-GTA08_BOTSDO08782(GTA08_BOTSDO08782);gene-GTA08_BOTSDO09127(GTA08_BOTSDO09127);gene-GTA08_BOTSDO1389…
GO:0006282	BP	regulation of DNA repair	1	0	1	12	0.57254	1	gene-GTA08_BOTSDO00957(GTA08_BOTSDO00957)	-
GO:0009310	BP	amine catabolic process	0	1	1	12	0.57254	1	-	gene-GTA08_BOTSDO05670(GTA08_BOTSDO05670)
GO:0009314	BP	response to radiation	1	0	1	12	0.57254	1	gene-GTA08_BOTSDO07779(GTA08_BOTSDO07779)	-
GO:0042176	BP	regulation of protein catabolic process	1	0	1	12	0.57254	1	gene-GTA08_BOTSDO00957(GTA08_BOTSDO00957)	-
GO:0071941	BP	nitrogen cycle metabolic process	0	1	1	12	0.57254	1	-	gene-GTA08_BOTSDO05378(GTA08_BOTSDO05378)
GO:2001020	BP	regulation of response to DNA damage stimulus	1	0	1	12	0.57254	1	gene-GTA08_BOTSDO00957(GTA08_BOTSDO00957)	-
GO:0044281	BP	small molecule metabolic process	11	28	39	582	0.578552	1	gene-GTA08_BOTSDO02628(GTA08_BOTSDO02628);gene-GTA08_BOTSDO04508(GTA08_BOTSDO04508);gene-GTA08_BOTSDO06780(GTA08_BOTSDO06780);gene-GTA08_BOTSDO07018(GTA08_BOTSDO07018);gene-GTA08_BOTSDO07298(GTA08_BOTSDO07298);gene-GTA08_BOTSDO07725(GTA08_BOTSDO07725);gene-GTA08_BOTSDO08520(GTA08_BOTSDO08520);gene-GTA08_BOTSDO11021(GTA08_BOTSDO11021);gene-GTA08_BOTSDO11135(GTA08_BOTSDO11135);gene-GTA08_BOTSDO1121…	gene-GTA08_BOTSDO00110(GTA08_BOTSDO00110);gene-GTA08_BOTSDO00156(GTA08_BOTSDO00156);gene-GTA08_BOTSDO00195(GTA08_BOTSDO00195);gene-GTA08_BOTSDO00716(GTA08_BOTSDO00716);gene-GTA08_BOTSDO01981(GTA08_BOTSDO01981);gene-GTA08_BOTSDO02221(GTA08_BOTSDO02221);gene-GTA08_BOTSDO03575(GTA08_BOTSDO03575);gene-GTA08_BOTSDO04126(GTA08_BOTSDO04126);gene-GTA08_BOTSDO04147(GTA08_BOTSDO04147);gene-GTA08_BOTSDO0537…
GO:0043648	BP	dicarboxylic acid metabolic process	2	1	3	44	0.586865	1	gene-GTA08_BOTSDO06780(GTA08_BOTSDO06780);gene-GTA08_BOTSDO07725(GTA08_BOTSDO07725)	gene-GTA08_BOTSDO09511(GTA08_BOTSDO09511)
GO:0016042	BP	lipid catabolic process	0	2	2	29	0.598951	1	-	gene-GTA08_BOTSDO00332(GTA08_BOTSDO00332);gene-GTA08_BOTSDO07597(GTA08_BOTSDO07597)
GO:0009056	BP	catabolic process	7	20	27	408	0.600688	1	gene-GTA08_BOTSDO00957(GTA08_BOTSDO00957);gene-GTA08_BOTSDO06780(GTA08_BOTSDO06780);gene-GTA08_BOTSDO07018(GTA08_BOTSDO07018);gene-GTA08_BOTSDO07350(GTA08_BOTSDO07350);gene-GTA08_BOTSDO10386(GTA08_BOTSDO10386);gene-GTA08_BOTSDO10907(GTA08_BOTSDO10907);gene-GTA08_BOTSDO11212(GTA08_BOTSDO11212)	gene-GTA08_BOTSDO00156(GTA08_BOTSDO00156);gene-GTA08_BOTSDO00332(GTA08_BOTSDO00332);gene-GTA08_BOTSDO00716(GTA08_BOTSDO00716);gene-GTA08_BOTSDO02133(GTA08_BOTSDO02133);gene-GTA08_BOTSDO02221(GTA08_BOTSDO02221);gene-GTA08_BOTSDO03575(GTA08_BOTSDO03575);gene-GTA08_BOTSDO05670(GTA08_BOTSDO05670);gene-GTA08_BOTSDO06534(GTA08_BOTSDO06534);gene-GTA08_BOTSDO07545(GTA08_BOTSDO07545);gene-GTA08_BOTSDO0759…
GO:0006084	BP	acetyl-CoA metabolic process	1	0	1	13	0.601799	1	gene-GTA08_BOTSDO11135(GTA08_BOTSDO11135)	-
GO:0006904	BP	vesicle docking involved in exocytosis	0	1	1	13	0.601799	1	-	gene-GTA08_BOTSDO09246(GTA08_BOTSDO09246)
GO:0043144	BP	snoRNA processing	0	1	1	13	0.601799	1	-	gene-GTA08_BOTSDO11445(GTA08_BOTSDO11445)
GO:0043618	BP	regulation of transcription from RNA polymerase II promoter in response to stress	1	0	1	13	0.601799	1	gene-GTA08_BOTSDO00957(GTA08_BOTSDO00957)	-
GO:0043620	BP	regulation of DNA-templated transcription in response to stress	1	0	1	13	0.601799	1	gene-GTA08_BOTSDO00957(GTA08_BOTSDO00957)	-
GO:0140029	BP	exocytic process	0	1	1	13	0.601799	1	-	gene-GTA08_BOTSDO09246(GTA08_BOTSDO09246)
GO:0009064	BP	glutamine family amino acid metabolic process	1	2	3	46	0.617478	1	gene-GTA08_BOTSDO06780(GTA08_BOTSDO06780)	gene-GTA08_BOTSDO01981(GTA08_BOTSDO01981);gene-GTA08_BOTSDO09511(GTA08_BOTSDO09511)
GO:0009067	BP	aspartate family amino acid biosynthetic process	1	1	2	30	0.617659	1	gene-GTA08_BOTSDO07725(GTA08_BOTSDO07725)	gene-GTA08_BOTSDO08260(GTA08_BOTSDO08260)
GO:0019318	BP	hexose metabolic process	2	0	2	30	0.617659	1	gene-GTA08_BOTSDO07018(GTA08_BOTSDO07018);gene-GTA08_BOTSDO11212(GTA08_BOTSDO11212)	-
GO:0006030	BP	chitin metabolic process	0	1	1	14	0.62906	1	-	gene-GTA08_BOTSDO07545(GTA08_BOTSDO07545)
GO:0006378	BP	mRNA polyadenylation	0	1	1	14	0.62906	1	-	gene-GTA08_BOTSDO11445(GTA08_BOTSDO11445)
GO:0009070	BP	serine family amino acid biosynthetic process	0	1	1	14	0.62906	1	-	gene-GTA08_BOTSDO11986(GTA08_BOTSDO11986)
GO:0033866	BP	nucleoside bisphosphate biosynthetic process	1	0	1	14	0.62906	1	gene-GTA08_BOTSDO11135(GTA08_BOTSDO11135)	-
GO:0034030	BP	ribonucleoside bisphosphate biosynthetic process	1	0	1	14	0.62906	1	gene-GTA08_BOTSDO11135(GTA08_BOTSDO11135)	-
GO:0034033	BP	purine nucleoside bisphosphate biosynthetic process	1	0	1	14	0.62906	1	gene-GTA08_BOTSDO11135(GTA08_BOTSDO11135)	-
GO:0043631	BP	RNA polyadenylation	0	1	1	14	0.62906	1	-	gene-GTA08_BOTSDO11445(GTA08_BOTSDO11445)
GO:0016051	BP	carbohydrate biosynthetic process	0	2	2	31	0.635691	1	-	gene-GTA08_BOTSDO02849(GTA08_BOTSDO02849);gene-GTA08_BOTSDO09584(GTA08_BOTSDO09584)
GO:0071310	BP	cellular response to organic substance	2	0	2	32	0.65305	1	gene-GTA08_BOTSDO07275(GTA08_BOTSDO07275);gene-GTA08_BOTSDO11467(GTA08_BOTSDO11467)	-
GO:0006022	BP	aminoglycan metabolic process	0	1	1	15	0.65446	1	-	gene-GTA08_BOTSDO07545(GTA08_BOTSDO07545)
GO:0006754	BP	ATP biosynthetic process	0	1	1	15	0.65446	1	-	gene-GTA08_BOTSDO00110(GTA08_BOTSDO00110)
GO:0016074	BP	snoRNA metabolic process	0	1	1	15	0.65446	1	-	gene-GTA08_BOTSDO11445(GTA08_BOTSDO11445)
GO:0030162	BP	regulation of proteolysis	1	0	1	15	0.65446	1	gene-GTA08_BOTSDO00957(GTA08_BOTSDO00957)	-
GO:0031331	BP	positive regulation of cellular catabolic process	1	0	1	15	0.65446	1	gene-GTA08_BOTSDO00957(GTA08_BOTSDO00957)	-
GO:0006629	BP	lipid metabolic process	10	5	15	237	0.661037	1	gene-GTA08_BOTSDO01186(GTA08_BOTSDO01186);gene-GTA08_BOTSDO01243(GTA08_BOTSDO01243);gene-GTA08_BOTSDO03811(GTA08_BOTSDO03811);gene-GTA08_BOTSDO05268(GTA08_BOTSDO05268);gene-GTA08_BOTSDO05964(GTA08_BOTSDO05964);gene-GTA08_BOTSDO08520(GTA08_BOTSDO08520);gene-GTA08_BOTSDO09619(GTA08_BOTSDO09619);gene-GTA08_BOTSDO10582(GTA08_BOTSDO10582);gene-GTA08_BOTSDO12331(GTA08_BOTSDO12331);gene-GTA08_BOTSDO1421…	gene-GTA08_BOTSDO00332(GTA08_BOTSDO00332);gene-GTA08_BOTSDO01769(GTA08_BOTSDO01769);gene-GTA08_BOTSDO02102(GTA08_BOTSDO02102);gene-GTA08_BOTSDO07597(GTA08_BOTSDO07597);gene-GTA08_BOTSDO13342(GTA08_BOTSDO13342)
GO:0009066	BP	aspartate family amino acid metabolic process	1	1	2	33	0.669744	1	gene-GTA08_BOTSDO07725(GTA08_BOTSDO07725)	gene-GTA08_BOTSDO08260(GTA08_BOTSDO08260)
GO:0015672	BP	monovalent inorganic cation transport	0	3	3	50	0.673973	1	-	gene-GTA08_BOTSDO00110(GTA08_BOTSDO00110);gene-GTA08_BOTSDO00662(GTA08_BOTSDO00662);gene-GTA08_BOTSDO08625(GTA08_BOTSDO08625)
GO:0006665	BP	sphingolipid metabolic process	1	0	1	16	0.678124	1	gene-GTA08_BOTSDO03811(GTA08_BOTSDO03811)	-
GO:0009145	BP	purine nucleoside triphosphate biosynthetic process	0	1	1	16	0.678124	1	-	gene-GTA08_BOTSDO00110(GTA08_BOTSDO00110)
GO:0009206	BP	purine ribonucleoside triphosphate biosynthetic process	0	1	1	16	0.678124	1	-	gene-GTA08_BOTSDO00110(GTA08_BOTSDO00110)
GO:0009896	BP	positive regulation of catabolic process	1	0	1	16	0.678124	1	gene-GTA08_BOTSDO00957(GTA08_BOTSDO00957)	-
GO:0044036	BP	cell wall macromolecule metabolic process	0	1	1	16	0.678124	1	-	gene-GTA08_BOTSDO02133(GTA08_BOTSDO02133)
GO:0044242	BP	cellular lipid catabolic process	0	1	1	16	0.678124	1	-	gene-GTA08_BOTSDO07597(GTA08_BOTSDO07597)
GO:0048278	BP	vesicle docking	0	1	1	16	0.678124	1	-	gene-GTA08_BOTSDO09246(GTA08_BOTSDO09246)
GO:0072329	BP	monocarboxylic acid catabolic process	0	1	1	16	0.678124	1	-	gene-GTA08_BOTSDO07597(GTA08_BOTSDO07597)
GO:0042221	BP	response to chemical	5	6	11	178	0.68043	1	gene-GTA08_BOTSDO01432(GTA08_BOTSDO01432);gene-GTA08_BOTSDO03402(GTA08_BOTSDO03402);gene-GTA08_BOTSDO07275(GTA08_BOTSDO07275);gene-GTA08_BOTSDO11467(GTA08_BOTSDO11467);gene-GTA08_BOTSDO13964(GTA08_BOTSDO13964)	gene-GTA08_BOTSDO01875(GTA08_BOTSDO01875);gene-GTA08_BOTSDO01877(GTA08_BOTSDO01877);gene-GTA08_BOTSDO02767(GTA08_BOTSDO02767);gene-GTA08_BOTSDO09766(GTA08_BOTSDO09766);gene-GTA08_BOTSDO10464(GTA08_BOTSDO10464);gene-GTA08_BOTSDO12189(GTA08_BOTSDO12189)
GO:0006541	BP	glutamine metabolic process	0	1	1	17	0.700171	1	-	gene-GTA08_BOTSDO01981(GTA08_BOTSDO01981)
GO:0006568	BP	tryptophan metabolic process	0	1	1	17	0.700171	1	-	gene-GTA08_BOTSDO05670(GTA08_BOTSDO05670)
GO:0006586	BP	indolalkylamine metabolic process	0	1	1	17	0.700171	1	-	gene-GTA08_BOTSDO05670(GTA08_BOTSDO05670)
GO:0006637	BP	acyl-CoA metabolic process	1	0	1	17	0.700171	1	gene-GTA08_BOTSDO11135(GTA08_BOTSDO11135)	-
GO:0009144	BP	purine nucleoside triphosphate metabolic process	0	1	1	17	0.700171	1	-	gene-GTA08_BOTSDO00110(GTA08_BOTSDO00110)
GO:0009205	BP	purine ribonucleoside triphosphate metabolic process	0	1	1	17	0.700171	1	-	gene-GTA08_BOTSDO00110(GTA08_BOTSDO00110)
GO:0034404	BP	nucleobase-containing small molecule biosynthetic process	0	1	1	17	0.700171	1	-	gene-GTA08_BOTSDO02221(GTA08_BOTSDO02221)
GO:0035383	BP	thioester metabolic process	1	0	1	17	0.700171	1	gene-GTA08_BOTSDO11135(GTA08_BOTSDO11135)	-
GO:0042430	BP	indole-containing compound metabolic process	0	1	1	17	0.700171	1	-	gene-GTA08_BOTSDO05670(GTA08_BOTSDO05670)
GO:1901071	BP	glucosamine-containing compound metabolic process	0	1	1	17	0.700171	1	-	gene-GTA08_BOTSDO07545(GTA08_BOTSDO07545)
GO:0005996	BP	monosaccharide metabolic process	2	0	2	36	0.715944	1	gene-GTA08_BOTSDO07018(GTA08_BOTSDO07018);gene-GTA08_BOTSDO11212(GTA08_BOTSDO11212)	-
GO:0006040	BP	amino sugar metabolic process	0	1	1	18	0.720711	1	-	gene-GTA08_BOTSDO07545(GTA08_BOTSDO07545)
GO:0009142	BP	nucleoside triphosphate biosynthetic process	0	1	1	18	0.720711	1	-	gene-GTA08_BOTSDO00110(GTA08_BOTSDO00110)
GO:0009201	BP	ribonucleoside triphosphate biosynthetic process	0	1	1	18	0.720711	1	-	gene-GTA08_BOTSDO00110(GTA08_BOTSDO00110)
GO:0044248	BP	cellular catabolic process	4	16	20	327	0.733187	1	gene-GTA08_BOTSDO00957(GTA08_BOTSDO00957);gene-GTA08_BOTSDO06780(GTA08_BOTSDO06780);gene-GTA08_BOTSDO10386(GTA08_BOTSDO10386);gene-GTA08_BOTSDO10907(GTA08_BOTSDO10907)	gene-GTA08_BOTSDO00156(GTA08_BOTSDO00156);gene-GTA08_BOTSDO00716(GTA08_BOTSDO00716);gene-GTA08_BOTSDO02133(GTA08_BOTSDO02133);gene-GTA08_BOTSDO02221(GTA08_BOTSDO02221);gene-GTA08_BOTSDO03575(GTA08_BOTSDO03575);gene-GTA08_BOTSDO05670(GTA08_BOTSDO05670);gene-GTA08_BOTSDO06534(GTA08_BOTSDO06534);gene-GTA08_BOTSDO07545(GTA08_BOTSDO07545);gene-GTA08_BOTSDO07597(GTA08_BOTSDO07597);gene-GTA08_BOTSDO0873…
GO:0009199	BP	ribonucleoside triphosphate metabolic process	0	1	1	19	0.739848	1	-	gene-GTA08_BOTSDO00110(GTA08_BOTSDO00110)
GO:0022406	BP	membrane docking	0	1	1	19	0.739848	1	-	gene-GTA08_BOTSDO09246(GTA08_BOTSDO09246)
GO:0140056	BP	organelle localization by membrane tethering	0	1	1	19	0.739848	1	-	gene-GTA08_BOTSDO09246(GTA08_BOTSDO09246)
GO:0030001	BP	metal ion transport	0	4	4	73	0.744706	1	-	gene-GTA08_BOTSDO00662(GTA08_BOTSDO00662);gene-GTA08_BOTSDO01732(GTA08_BOTSDO01732);gene-GTA08_BOTSDO05395(GTA08_BOTSDO05395);gene-GTA08_BOTSDO08625(GTA08_BOTSDO08625)
GO:0006887	BP	exocytosis	0	1	1	20	0.757676	1	-	gene-GTA08_BOTSDO09246(GTA08_BOTSDO09246)
GO:0009069	BP	serine family amino acid metabolic process	0	1	1	20	0.757676	1	-	gene-GTA08_BOTSDO11986(GTA08_BOTSDO11986)
GO:0046434	BP	organophosphate catabolic process	0	1	1	20	0.757676	1	-	gene-GTA08_BOTSDO02221(GTA08_BOTSDO02221)
GO:0006810	BP	transport	21	59	80	1246	0.759232	1	gene-GTA08_BOTSDO00218(GTA08_BOTSDO00218);gene-GTA08_BOTSDO02626(GTA08_BOTSDO02626);gene-GTA08_BOTSDO02654(GTA08_BOTSDO02654);gene-GTA08_BOTSDO02880(GTA08_BOTSDO02880);gene-GTA08_BOTSDO03375(GTA08_BOTSDO03375);gene-GTA08_BOTSDO04416(GTA08_BOTSDO04416);gene-GTA08_BOTSDO04858(GTA08_BOTSDO04858);gene-GTA08_BOTSDO04869(GTA08_BOTSDO04869);gene-GTA08_BOTSDO05162(GTA08_BOTSDO05162);gene-GTA08_BOTSDO0526…	gene-GTA08_BOTSDO00110(GTA08_BOTSDO00110);gene-GTA08_BOTSDO00393(GTA08_BOTSDO00393);gene-GTA08_BOTSDO00567(GTA08_BOTSDO00567);gene-GTA08_BOTSDO00662(GTA08_BOTSDO00662);gene-GTA08_BOTSDO00902(GTA08_BOTSDO00902);gene-GTA08_BOTSDO01248(GTA08_BOTSDO01248);gene-GTA08_BOTSDO01335(GTA08_BOTSDO01335);gene-GTA08_BOTSDO01346(GTA08_BOTSDO01346);gene-GTA08_BOTSDO01431(GTA08_BOTSDO01431);gene-GTA08_BOTSDO0150…
GO:0016053	BP	organic acid biosynthetic process	3	6	9	158	0.761906	1	gene-GTA08_BOTSDO07298(GTA08_BOTSDO07298);gene-GTA08_BOTSDO07725(GTA08_BOTSDO07725);gene-GTA08_BOTSDO11490(GTA08_BOTSDO11490)	gene-GTA08_BOTSDO00716(GTA08_BOTSDO00716);gene-GTA08_BOTSDO04126(GTA08_BOTSDO04126);gene-GTA08_BOTSDO08260(GTA08_BOTSDO08260);gene-GTA08_BOTSDO09511(GTA08_BOTSDO09511);gene-GTA08_BOTSDO11714(GTA08_BOTSDO11714);gene-GTA08_BOTSDO11986(GTA08_BOTSDO11986)
GO:0046394	BP	carboxylic acid biosynthetic process	3	6	9	158	0.761906	1	gene-GTA08_BOTSDO07298(GTA08_BOTSDO07298);gene-GTA08_BOTSDO07725(GTA08_BOTSDO07725);gene-GTA08_BOTSDO11490(GTA08_BOTSDO11490)	gene-GTA08_BOTSDO00716(GTA08_BOTSDO00716);gene-GTA08_BOTSDO04126(GTA08_BOTSDO04126);gene-GTA08_BOTSDO08260(GTA08_BOTSDO08260);gene-GTA08_BOTSDO09511(GTA08_BOTSDO09511);gene-GTA08_BOTSDO11714(GTA08_BOTSDO11714);gene-GTA08_BOTSDO11986(GTA08_BOTSDO11986)
GO:0009084	BP	glutamine family amino acid biosynthetic process	0	1	1	21	0.774285	1	-	gene-GTA08_BOTSDO09511(GTA08_BOTSDO09511)
GO:0009086	BP	methionine biosynthetic process	0	1	1	21	0.774285	1	-	gene-GTA08_BOTSDO08260(GTA08_BOTSDO08260)
GO:0009060	BP	aerobic respiration	1	1	2	41	0.780831	1	gene-GTA08_BOTSDO11021(GTA08_BOTSDO11021)	gene-GTA08_BOTSDO07597(GTA08_BOTSDO07597)
GO:0017144	BP	drug metabolic process	0	6	6	112	0.786943	1	-	gene-GTA08_BOTSDO00110(GTA08_BOTSDO00110);gene-GTA08_BOTSDO00716(GTA08_BOTSDO00716);gene-GTA08_BOTSDO06534(GTA08_BOTSDO06534);gene-GTA08_BOTSDO07545(GTA08_BOTSDO07545);gene-GTA08_BOTSDO07597(GTA08_BOTSDO07597);gene-GTA08_BOTSDO12189(GTA08_BOTSDO12189)
GO:0000413	BP	protein peptidyl-prolyl isomerization	0	1	1	22	0.789759	1	-	gene-GTA08_BOTSDO11300(GTA08_BOTSDO11300)
GO:0006555	BP	methionine metabolic process	0	1	1	22	0.789759	1	-	gene-GTA08_BOTSDO08260(GTA08_BOTSDO08260)
GO:0006576	BP	cellular biogenic amine metabolic process	0	1	1	22	0.789759	1	-	gene-GTA08_BOTSDO05670(GTA08_BOTSDO05670)
GO:0009141	BP	nucleoside triphosphate metabolic process	0	1	1	22	0.789759	1	-	gene-GTA08_BOTSDO00110(GTA08_BOTSDO00110)
GO:0031124	BP	mRNA 3'-end processing	0	1	1	22	0.789759	1	-	gene-GTA08_BOTSDO11445(GTA08_BOTSDO11445)
GO:0032940	BP	secretion by cell	0	1	1	22	0.789759	1	-	gene-GTA08_BOTSDO09246(GTA08_BOTSDO09246)
GO:0033865	BP	nucleoside bisphosphate metabolic process	1	0	1	22	0.789759	1	gene-GTA08_BOTSDO11135(GTA08_BOTSDO11135)	-
GO:0033875	BP	ribonucleoside bisphosphate metabolic process	1	0	1	22	0.789759	1	gene-GTA08_BOTSDO11135(GTA08_BOTSDO11135)	-
GO:0034032	BP	purine nucleoside bisphosphate metabolic process	1	0	1	22	0.789759	1	gene-GTA08_BOTSDO11135(GTA08_BOTSDO11135)	-
GO:0043628	BP	ncRNA 3'-end processing	0	1	1	22	0.789759	1	-	gene-GTA08_BOTSDO11445(GTA08_BOTSDO11445)
GO:0046903	BP	secretion	0	1	1	22	0.789759	1	-	gene-GTA08_BOTSDO09246(GTA08_BOTSDO09246)
GO:0080135	BP	regulation of cellular response to stress	1	0	1	22	0.789759	1	gene-GTA08_BOTSDO00957(GTA08_BOTSDO00957)	-
GO:0051234	BP	establishment of localization	21	59	80	1258	0.789936	1	gene-GTA08_BOTSDO00218(GTA08_BOTSDO00218);gene-GTA08_BOTSDO02626(GTA08_BOTSDO02626);gene-GTA08_BOTSDO02654(GTA08_BOTSDO02654);gene-GTA08_BOTSDO02880(GTA08_BOTSDO02880);gene-GTA08_BOTSDO03375(GTA08_BOTSDO03375);gene-GTA08_BOTSDO04416(GTA08_BOTSDO04416);gene-GTA08_BOTSDO04858(GTA08_BOTSDO04858);gene-GTA08_BOTSDO04869(GTA08_BOTSDO04869);gene-GTA08_BOTSDO05162(GTA08_BOTSDO05162);gene-GTA08_BOTSDO0526…	gene-GTA08_BOTSDO00110(GTA08_BOTSDO00110);gene-GTA08_BOTSDO00393(GTA08_BOTSDO00393);gene-GTA08_BOTSDO00567(GTA08_BOTSDO00567);gene-GTA08_BOTSDO00662(GTA08_BOTSDO00662);gene-GTA08_BOTSDO00902(GTA08_BOTSDO00902);gene-GTA08_BOTSDO01248(GTA08_BOTSDO01248);gene-GTA08_BOTSDO01335(GTA08_BOTSDO01335);gene-GTA08_BOTSDO01346(GTA08_BOTSDO01346);gene-GTA08_BOTSDO01431(GTA08_BOTSDO01431);gene-GTA08_BOTSDO0150…
GO:0018208	BP	peptidyl-proline modification	0	1	1	23	0.804174	1	-	gene-GTA08_BOTSDO11300(GTA08_BOTSDO11300)
GO:0080134	BP	regulation of response to stress	1	0	1	23	0.804174	1	gene-GTA08_BOTSDO00957(GTA08_BOTSDO00957)	-
GO:0031329	BP	regulation of cellular catabolic process	1	0	1	24	0.817603	1	gene-GTA08_BOTSDO00957(GTA08_BOTSDO00957)	-
GO:0140352	BP	export from cell	0	1	1	24	0.817603	1	-	gene-GTA08_BOTSDO09246(GTA08_BOTSDO09246)
GO:0006913	BP	nucleocytoplasmic transport	0	4	4	82	0.821319	1	-	gene-GTA08_BOTSDO05301(GTA08_BOTSDO05301);gene-GTA08_BOTSDO05670(GTA08_BOTSDO05670);gene-GTA08_BOTSDO08034(GTA08_BOTSDO08034);gene-GTA08_BOTSDO08265(GTA08_BOTSDO08265)
GO:0051169	BP	nuclear transport	0	4	4	82	0.821319	1	-	gene-GTA08_BOTSDO05301(GTA08_BOTSDO05301);gene-GTA08_BOTSDO05670(GTA08_BOTSDO05670);gene-GTA08_BOTSDO08034(GTA08_BOTSDO08034);gene-GTA08_BOTSDO08265(GTA08_BOTSDO08265)
GO:0044283	BP	small molecule biosynthetic process	3	9	12	219	0.826839	1	gene-GTA08_BOTSDO07298(GTA08_BOTSDO07298);gene-GTA08_BOTSDO07725(GTA08_BOTSDO07725);gene-GTA08_BOTSDO11490(GTA08_BOTSDO11490)	gene-GTA08_BOTSDO00716(GTA08_BOTSDO00716);gene-GTA08_BOTSDO02221(GTA08_BOTSDO02221);gene-GTA08_BOTSDO04126(GTA08_BOTSDO04126);gene-GTA08_BOTSDO08260(GTA08_BOTSDO08260);gene-GTA08_BOTSDO08782(GTA08_BOTSDO08782);gene-GTA08_BOTSDO09511(GTA08_BOTSDO09511);gene-GTA08_BOTSDO11714(GTA08_BOTSDO11714);gene-GTA08_BOTSDO11986(GTA08_BOTSDO11986);gene-GTA08_BOTSDO13890(GTA08_BOTSDO13890)
GO:0032535	BP	regulation of cellular component size	1	0	1	25	0.830113	1	gene-GTA08_BOTSDO06692(GTA08_BOTSDO06692)	-
GO:0046148	BP	pigment biosynthetic process	0	1	1	25	0.830113	1	-	gene-GTA08_BOTSDO09837(GTA08_BOTSDO09837)
GO:0090066	BP	regulation of anatomical structure size	1	0	1	25	0.830113	1	gene-GTA08_BOTSDO06692(GTA08_BOTSDO06692)	-
GO:0000097	BP	sulfur amino acid biosynthetic process	0	1	1	26	0.841767	1	-	gene-GTA08_BOTSDO08260(GTA08_BOTSDO08260)
GO:0042180	BP	cellular ketone metabolic process	0	1	1	26	0.841767	1	-	gene-GTA08_BOTSDO05670(GTA08_BOTSDO05670)
GO:0042440	BP	pigment metabolic process	0	1	1	26	0.841767	1	-	gene-GTA08_BOTSDO09837(GTA08_BOTSDO09837)
GO:0006631	BP	fatty acid metabolic process	1	1	2	48	0.849724	1	gene-GTA08_BOTSDO08520(GTA08_BOTSDO08520)	gene-GTA08_BOTSDO07597(GTA08_BOTSDO07597)
GO:0010033	BP	response to organic substance	2	0	2	48	0.849724	1	gene-GTA08_BOTSDO07275(GTA08_BOTSDO07275);gene-GTA08_BOTSDO11467(GTA08_BOTSDO11467)	-
GO:0009073	BP	aromatic amino acid family biosynthetic process	0	1	1	27	0.852624	1	-	gene-GTA08_BOTSDO04126(GTA08_BOTSDO04126)
GO:0044106	BP	cellular amine metabolic process	0	1	1	27	0.852624	1	-	gene-GTA08_BOTSDO05670(GTA08_BOTSDO05670)
GO:0071214	BP	cellular response to abiotic stimulus	1	0	1	27	0.852624	1	gene-GTA08_BOTSDO07779(GTA08_BOTSDO07779)	-
GO:0104004	BP	cellular response to environmental stimulus	1	0	1	27	0.852624	1	gene-GTA08_BOTSDO07779(GTA08_BOTSDO07779)	-
GO:0045333	BP	cellular respiration	1	1	2	49	0.857779	1	gene-GTA08_BOTSDO11021(GTA08_BOTSDO11021)	gene-GTA08_BOTSDO07597(GTA08_BOTSDO07597)
GO:0006164	BP	purine nucleotide biosynthetic process	1	1	2	50	0.865437	1	gene-GTA08_BOTSDO11135(GTA08_BOTSDO11135)	gene-GTA08_BOTSDO00110(GTA08_BOTSDO00110)
GO:0009152	BP	purine ribonucleotide biosynthetic process	1	1	2	50	0.865437	1	gene-GTA08_BOTSDO11135(GTA08_BOTSDO11135)	gene-GTA08_BOTSDO00110(GTA08_BOTSDO00110)
GO:0098662	BP	inorganic cation transmembrane transport	0	3	3	70	0.866531	1	-	gene-GTA08_BOTSDO00110(GTA08_BOTSDO00110);gene-GTA08_BOTSDO00662(GTA08_BOTSDO00662);gene-GTA08_BOTSDO08625(GTA08_BOTSDO08625)
GO:0000122	BP	negative regulation of transcription by RNA polymerase II	1	0	1	29	0.872158	1	gene-GTA08_BOTSDO00957(GTA08_BOTSDO00957)	-
GO:0009894	BP	regulation of catabolic process	1	0	1	29	0.872158	1	gene-GTA08_BOTSDO00957(GTA08_BOTSDO00957)	-
GO:0051052	BP	regulation of DNA metabolic process	1	0	1	29	0.872158	1	gene-GTA08_BOTSDO00957(GTA08_BOTSDO00957)	-
GO:0044272	BP	sulfur compound biosynthetic process	1	1	2	51	0.872716	1	gene-GTA08_BOTSDO11135(GTA08_BOTSDO11135)	gene-GTA08_BOTSDO08260(GTA08_BOTSDO08260)
GO:0006820	BP	anion transport	2	4	6	127	0.874788	1	gene-GTA08_BOTSDO04858(GTA08_BOTSDO04858);gene-GTA08_BOTSDO07931(GTA08_BOTSDO07931)	gene-GTA08_BOTSDO03853(GTA08_BOTSDO03853);gene-GTA08_BOTSDO05514(GTA08_BOTSDO05514);gene-GTA08_BOTSDO08019(GTA08_BOTSDO08019);gene-GTA08_BOTSDO09892(GTA08_BOTSDO09892)
GO:0000096	BP	sulfur amino acid metabolic process	0	1	1	30	0.880934	1	-	gene-GTA08_BOTSDO08260(GTA08_BOTSDO08260)
GO:0006457	BP	protein folding	2	1	3	73	0.884535	1	gene-GTA08_BOTSDO07275(GTA08_BOTSDO07275);gene-GTA08_BOTSDO11467(GTA08_BOTSDO11467)	gene-GTA08_BOTSDO11300(GTA08_BOTSDO11300)
GO:0015980	BP	energy derivation by oxidation of organic compounds	1	1	2	53	0.8862	1	gene-GTA08_BOTSDO11021(GTA08_BOTSDO11021)	gene-GTA08_BOTSDO07597(GTA08_BOTSDO07597)
GO:0006643	BP	membrane lipid metabolic process	1	0	1	31	0.889108	1	gene-GTA08_BOTSDO03811(GTA08_BOTSDO03811)	-
GO:1902600	BP	proton transmembrane transport	0	1	1	31	0.889108	1	-	gene-GTA08_BOTSDO00110(GTA08_BOTSDO00110)
GO:1903825	BP	organic acid transmembrane transport	2	1	3	74	0.890037	1	gene-GTA08_BOTSDO04858(GTA08_BOTSDO04858);gene-GTA08_BOTSDO07931(GTA08_BOTSDO07931)	gene-GTA08_BOTSDO03853(GTA08_BOTSDO03853)
GO:1905039	BP	carboxylic acid transmembrane transport	2	1	3	74	0.890037	1	gene-GTA08_BOTSDO04858(GTA08_BOTSDO04858);gene-GTA08_BOTSDO07931(GTA08_BOTSDO07931)	gene-GTA08_BOTSDO03853(GTA08_BOTSDO03853)
GO:0009260	BP	ribonucleotide biosynthetic process	1	1	2	54	0.892435	1	gene-GTA08_BOTSDO11135(GTA08_BOTSDO11135)	gene-GTA08_BOTSDO00110(GTA08_BOTSDO00110)
GO:0098660	BP	inorganic ion transmembrane transport	0	3	3	75	0.895304	1	-	gene-GTA08_BOTSDO00110(GTA08_BOTSDO00110);gene-GTA08_BOTSDO00662(GTA08_BOTSDO00662);gene-GTA08_BOTSDO08625(GTA08_BOTSDO08625)
GO:0006289	BP	nucleotide-excision repair	1	0	1	32	0.896723	1	gene-GTA08_BOTSDO07779(GTA08_BOTSDO07779)	-
GO:0046700	BP	heterocycle catabolic process	1	3	4	97	0.90644	1	gene-GTA08_BOTSDO06780(GTA08_BOTSDO06780)	gene-GTA08_BOTSDO02221(GTA08_BOTSDO02221);gene-GTA08_BOTSDO05670(GTA08_BOTSDO05670);gene-GTA08_BOTSDO11445(GTA08_BOTSDO11445)
GO:0046390	BP	ribose phosphate biosynthetic process	1	1	2	57	0.909287	1	gene-GTA08_BOTSDO11135(GTA08_BOTSDO11135)	gene-GTA08_BOTSDO00110(GTA08_BOTSDO00110)
GO:0000956	BP	nuclear-transcribed mRNA catabolic process	0	1	1	34	0.910423	1	-	gene-GTA08_BOTSDO11445(GTA08_BOTSDO11445)
GO:0072522	BP	purine-containing compound biosynthetic process	1	1	2	58	0.914333	1	gene-GTA08_BOTSDO11135(GTA08_BOTSDO11135)	gene-GTA08_BOTSDO00110(GTA08_BOTSDO00110)
GO:0051179	BP	localization	21	59	80	1325	0.914514	1	gene-GTA08_BOTSDO00218(GTA08_BOTSDO00218);gene-GTA08_BOTSDO02626(GTA08_BOTSDO02626);gene-GTA08_BOTSDO02654(GTA08_BOTSDO02654);gene-GTA08_BOTSDO02880(GTA08_BOTSDO02880);gene-GTA08_BOTSDO03375(GTA08_BOTSDO03375);gene-GTA08_BOTSDO04416(GTA08_BOTSDO04416);gene-GTA08_BOTSDO04858(GTA08_BOTSDO04858);gene-GTA08_BOTSDO04869(GTA08_BOTSDO04869);gene-GTA08_BOTSDO05162(GTA08_BOTSDO05162);gene-GTA08_BOTSDO0526…	gene-GTA08_BOTSDO00110(GTA08_BOTSDO00110);gene-GTA08_BOTSDO00393(GTA08_BOTSDO00393);gene-GTA08_BOTSDO00567(GTA08_BOTSDO00567);gene-GTA08_BOTSDO00662(GTA08_BOTSDO00662);gene-GTA08_BOTSDO00902(GTA08_BOTSDO00902);gene-GTA08_BOTSDO01248(GTA08_BOTSDO01248);gene-GTA08_BOTSDO01335(GTA08_BOTSDO01335);gene-GTA08_BOTSDO01346(GTA08_BOTSDO01346);gene-GTA08_BOTSDO01431(GTA08_BOTSDO01431);gene-GTA08_BOTSDO0150…
GO:0046474	BP	glycerophospholipid biosynthetic process	0	1	1	36	0.92231	1	-	gene-GTA08_BOTSDO01769(GTA08_BOTSDO01769)
GO:0031123	BP	RNA 3'-end processing	0	1	1	37	0.927649	1	-	gene-GTA08_BOTSDO11445(GTA08_BOTSDO11445)
GO:0015849	BP	organic acid transport	2	1	3	83	0.929912	1	gene-GTA08_BOTSDO04858(GTA08_BOTSDO04858);gene-GTA08_BOTSDO07931(GTA08_BOTSDO07931)	gene-GTA08_BOTSDO03853(GTA08_BOTSDO03853)
GO:0046942	BP	carboxylic acid transport	2	1	3	83	0.929912	1	gene-GTA08_BOTSDO04858(GTA08_BOTSDO04858);gene-GTA08_BOTSDO07931(GTA08_BOTSDO07931)	gene-GTA08_BOTSDO03853(GTA08_BOTSDO03853)
GO:0006402	BP	mRNA catabolic process	0	1	1	38	0.932623	1	-	gene-GTA08_BOTSDO11445(GTA08_BOTSDO11445)
GO:0006950	BP	response to stress	12	5	17	340	0.937047	1	gene-GTA08_BOTSDO00957(GTA08_BOTSDO00957);gene-GTA08_BOTSDO01201(GTA08_BOTSDO01201);gene-GTA08_BOTSDO03402(GTA08_BOTSDO03402);gene-GTA08_BOTSDO04384(GTA08_BOTSDO04384);gene-GTA08_BOTSDO06402(GTA08_BOTSDO06402);gene-GTA08_BOTSDO07275(GTA08_BOTSDO07275);gene-GTA08_BOTSDO07779(GTA08_BOTSDO07779);gene-GTA08_BOTSDO08362(GTA08_BOTSDO08362);gene-GTA08_BOTSDO10589(GTA08_BOTSDO10589);gene-GTA08_BOTSDO1146…	gene-GTA08_BOTSDO02767(GTA08_BOTSDO02767);gene-GTA08_BOTSDO03722(GTA08_BOTSDO03722);gene-GTA08_BOTSDO09766(GTA08_BOTSDO09766);gene-GTA08_BOTSDO10464(GTA08_BOTSDO10464);gene-GTA08_BOTSDO12189(GTA08_BOTSDO12189)
GO:0045017	BP	glycerolipid biosynthetic process	0	1	1	39	0.937255	1	-	gene-GTA08_BOTSDO01769(GTA08_BOTSDO01769)
GO:0009057	BP	macromolecule catabolic process	3	7	10	220	0.941104	1	gene-GTA08_BOTSDO00957(GTA08_BOTSDO00957);gene-GTA08_BOTSDO10386(GTA08_BOTSDO10386);gene-GTA08_BOTSDO10907(GTA08_BOTSDO10907)	gene-GTA08_BOTSDO02133(GTA08_BOTSDO02133);gene-GTA08_BOTSDO07545(GTA08_BOTSDO07545);gene-GTA08_BOTSDO08820(GTA08_BOTSDO08820);gene-GTA08_BOTSDO09127(GTA08_BOTSDO09127);gene-GTA08_BOTSDO11445(GTA08_BOTSDO11445);gene-GTA08_BOTSDO11969(GTA08_BOTSDO11969);gene-GTA08_BOTSDO13846(GTA08_BOTSDO13846)
GO:0003333	BP	amino acid transmembrane transport	1	1	2	66	0.946184	1	gene-GTA08_BOTSDO07931(GTA08_BOTSDO07931)	gene-GTA08_BOTSDO03853(GTA08_BOTSDO03853)
GO:0044255	BP	cellular lipid metabolic process	5	2	7	168	0.947532	1	gene-GTA08_BOTSDO01186(GTA08_BOTSDO01186);gene-GTA08_BOTSDO03811(GTA08_BOTSDO03811);gene-GTA08_BOTSDO08520(GTA08_BOTSDO08520);gene-GTA08_BOTSDO09619(GTA08_BOTSDO09619);gene-GTA08_BOTSDO14217(GTA08_BOTSDO14217)	gene-GTA08_BOTSDO01769(GTA08_BOTSDO01769);gene-GTA08_BOTSDO07597(GTA08_BOTSDO07597)
GO:0034655	BP	nucleobase-containing compound catabolic process	0	2	2	68	0.952175	1	-	gene-GTA08_BOTSDO02221(GTA08_BOTSDO02221);gene-GTA08_BOTSDO11445(GTA08_BOTSDO11445)
GO:0098656	BP	anion transmembrane transport	2	1	3	92	0.956102	1	gene-GTA08_BOTSDO04858(GTA08_BOTSDO04858);gene-GTA08_BOTSDO07931(GTA08_BOTSDO07931)	gene-GTA08_BOTSDO03853(GTA08_BOTSDO03853)
GO:0044270	BP	cellular nitrogen compound catabolic process	0	3	3	93	0.958366	1	-	gene-GTA08_BOTSDO02221(GTA08_BOTSDO02221);gene-GTA08_BOTSDO05670(GTA08_BOTSDO05670);gene-GTA08_BOTSDO11445(GTA08_BOTSDO11445)
GO:0045229	BP	external encapsulating structure organization	1	0	1	45	0.959087	1	gene-GTA08_BOTSDO11906(GTA08_BOTSDO11906)	-
GO:0071555	BP	cell wall organization	1	0	1	45	0.959087	1	gene-GTA08_BOTSDO11906(GTA08_BOTSDO11906)	-
GO:0072330	BP	monocarboxylic acid biosynthetic process	0	1	1	45	0.959087	1	-	gene-GTA08_BOTSDO00716(GTA08_BOTSDO00716)
GO:0008610	BP	lipid biosynthetic process	3	1	4	115	0.959839	1	gene-GTA08_BOTSDO01186(GTA08_BOTSDO01186);gene-GTA08_BOTSDO09619(GTA08_BOTSDO09619);gene-GTA08_BOTSDO14217(GTA08_BOTSDO14217)	gene-GTA08_BOTSDO01769(GTA08_BOTSDO01769)
GO:0046034	BP	ATP metabolic process	0	1	1	46	0.961903	1	-	gene-GTA08_BOTSDO00110(GTA08_BOTSDO00110)
GO:0006865	BP	amino acid transport	1	1	2	73	0.964493	1	gene-GTA08_BOTSDO07931(GTA08_BOTSDO07931)	gene-GTA08_BOTSDO03853(GTA08_BOTSDO03853)
GO:0015074	BP	DNA integration	0	1	1	47	0.964526	1	-	gene-GTA08_BOTSDO05364(GTA08_BOTSDO05364)
GO:0098655	BP	cation transmembrane transport	0	3	3	98	0.968135	1	-	gene-GTA08_BOTSDO00110(GTA08_BOTSDO00110);gene-GTA08_BOTSDO00662(GTA08_BOTSDO00662);gene-GTA08_BOTSDO08625(GTA08_BOTSDO08625)
GO:0032270	BP	positive regulation of cellular protein metabolic process	1	0	1	49	0.969243	1	gene-GTA08_BOTSDO00957(GTA08_BOTSDO00957)	-
GO:0006163	BP	purine nucleotide metabolic process	1	1	2	76	0.970356	1	gene-GTA08_BOTSDO11135(GTA08_BOTSDO11135)	gene-GTA08_BOTSDO00110(GTA08_BOTSDO00110)
GO:0009150	BP	purine ribonucleotide metabolic process	1	1	2	76	0.970356	1	gene-GTA08_BOTSDO11135(GTA08_BOTSDO11135)	gene-GTA08_BOTSDO00110(GTA08_BOTSDO00110)
GO:0071554	BP	cell wall organization or biogenesis	1	1	2	76	0.970356	1	gene-GTA08_BOTSDO11906(GTA08_BOTSDO11906)	gene-GTA08_BOTSDO02133(GTA08_BOTSDO02133)
GO:0032259	BP	methylation	4	4	8	202	0.971152	1	gene-GTA08_BOTSDO02774(GTA08_BOTSDO02774);gene-GTA08_BOTSDO09616(GTA08_BOTSDO09616);gene-GTA08_BOTSDO11768(GTA08_BOTSDO11768);gene-GTA08_BOTSDO13636(GTA08_BOTSDO13636)	gene-GTA08_BOTSDO01769(GTA08_BOTSDO01769);gene-GTA08_BOTSDO02392(GTA08_BOTSDO02392);gene-GTA08_BOTSDO07674(GTA08_BOTSDO07674);gene-GTA08_BOTSDO08260(GTA08_BOTSDO08260)
GO:0008654	BP	phospholipid biosynthetic process	0	1	1	50	0.971361	1	-	gene-GTA08_BOTSDO01769(GTA08_BOTSDO01769)
GO:0009628	BP	response to abiotic stimulus	1	0	1	50	0.971361	1	gene-GTA08_BOTSDO07779(GTA08_BOTSDO07779)	-
GO:0051247	BP	positive regulation of protein metabolic process	1	0	1	50	0.971361	1	gene-GTA08_BOTSDO00957(GTA08_BOTSDO00957)	-
GO:0006812	BP	cation transport	0	5	5	143	0.971661	1	-	gene-GTA08_BOTSDO00110(GTA08_BOTSDO00110);gene-GTA08_BOTSDO00662(GTA08_BOTSDO00662);gene-GTA08_BOTSDO01732(GTA08_BOTSDO01732);gene-GTA08_BOTSDO05395(GTA08_BOTSDO05395);gene-GTA08_BOTSDO08625(GTA08_BOTSDO08625)
GO:0015711	BP	organic anion transport	2	1	3	101	0.972913	1	gene-GTA08_BOTSDO04858(GTA08_BOTSDO04858);gene-GTA08_BOTSDO07931(GTA08_BOTSDO07931)	gene-GTA08_BOTSDO03853(GTA08_BOTSDO03853)
GO:0090305	BP	nucleic acid phosphodiester bond hydrolysis	1	3	4	123	0.972965	1	gene-GTA08_BOTSDO07779(GTA08_BOTSDO07779)	gene-GTA08_BOTSDO03722(GTA08_BOTSDO03722);gene-GTA08_BOTSDO04125(GTA08_BOTSDO04125);gene-GTA08_BOTSDO10643(GTA08_BOTSDO10643)
GO:0006401	BP	RNA catabolic process	0	1	1	51	0.973334	1	-	gene-GTA08_BOTSDO11445(GTA08_BOTSDO11445)
GO:0006811	BP	ion transport	2	9	11	263	0.975632	1	gene-GTA08_BOTSDO04858(GTA08_BOTSDO04858);gene-GTA08_BOTSDO07931(GTA08_BOTSDO07931)	gene-GTA08_BOTSDO00110(GTA08_BOTSDO00110);gene-GTA08_BOTSDO00662(GTA08_BOTSDO00662);gene-GTA08_BOTSDO01732(GTA08_BOTSDO01732);gene-GTA08_BOTSDO03853(GTA08_BOTSDO03853);gene-GTA08_BOTSDO05395(GTA08_BOTSDO05395);gene-GTA08_BOTSDO05514(GTA08_BOTSDO05514);gene-GTA08_BOTSDO08019(GTA08_BOTSDO08019);gene-GTA08_BOTSDO08625(GTA08_BOTSDO08625);gene-GTA08_BOTSDO09892(GTA08_BOTSDO09892)
GO:0009259	BP	ribonucleotide metabolic process	1	1	2	80	0.97674	1	gene-GTA08_BOTSDO11135(GTA08_BOTSDO11135)	gene-GTA08_BOTSDO00110(GTA08_BOTSDO00110)
GO:0032787	BP	monocarboxylic acid metabolic process	1	2	3	104	0.977008	1	gene-GTA08_BOTSDO08520(GTA08_BOTSDO08520)	gene-GTA08_BOTSDO00716(GTA08_BOTSDO00716);gene-GTA08_BOTSDO07597(GTA08_BOTSDO07597)
GO:0009165	BP	nucleotide biosynthetic process	1	1	2	81	0.978115	1	gene-GTA08_BOTSDO11135(GTA08_BOTSDO11135)	gene-GTA08_BOTSDO00110(GTA08_BOTSDO00110)
GO:0006650	BP	glycerophospholipid metabolic process	0	1	1	54	0.978476	1	-	gene-GTA08_BOTSDO01769(GTA08_BOTSDO01769)
GO:0043161	BP	proteasome-mediated ubiquitin-dependent protein catabolic process	1	0	1	54	0.978476	1	gene-GTA08_BOTSDO00957(GTA08_BOTSDO00957)	-
GO:0090502	BP	RNA phosphodiester bond hydrolysis, endonucleolytic	0	1	1	54	0.978476	1	-	gene-GTA08_BOTSDO04125(GTA08_BOTSDO04125)
GO:0019693	BP	ribose phosphate metabolic process	1	1	2	83	0.980634	1	gene-GTA08_BOTSDO11135(GTA08_BOTSDO11135)	gene-GTA08_BOTSDO00110(GTA08_BOTSDO00110)
GO:1901293	BP	nucleoside phosphate biosynthetic process	1	1	2	84	0.981786	1	gene-GTA08_BOTSDO11135(GTA08_BOTSDO11135)	gene-GTA08_BOTSDO00110(GTA08_BOTSDO00110)
GO:0010498	BP	proteasomal protein catabolic process	1	0	1	57	0.982628	1	gene-GTA08_BOTSDO00957(GTA08_BOTSDO00957)	-
GO:0046486	BP	glycerolipid metabolic process	0	1	1	58	0.983826	1	-	gene-GTA08_BOTSDO01769(GTA08_BOTSDO01769)
GO:0006091	BP	generation of precursor metabolites and energy	1	1	2	86	0.983894	1	gene-GTA08_BOTSDO11021(GTA08_BOTSDO11021)	gene-GTA08_BOTSDO07597(GTA08_BOTSDO07597)
GO:0006790	BP	sulfur compound metabolic process	1	1	2	89	0.986618	1	gene-GTA08_BOTSDO11135(GTA08_BOTSDO11135)	gene-GTA08_BOTSDO08260(GTA08_BOTSDO08260)
GO:0045944	BP	positive regulation of transcription by RNA polymerase II	1	0	1	61	0.986948	1	gene-GTA08_BOTSDO00957(GTA08_BOTSDO00957)	-
GO:0072521	BP	purine-containing compound metabolic process	1	1	2	94	0.990195	1	gene-GTA08_BOTSDO11135(GTA08_BOTSDO11135)	gene-GTA08_BOTSDO00110(GTA08_BOTSDO00110)
GO:0048583	BP	regulation of response to stimulus	1	0	1	66	0.990873	1	gene-GTA08_BOTSDO00957(GTA08_BOTSDO00957)	-
GO:0034220	BP	ion transmembrane transport	2	4	6	188	0.990926	1	gene-GTA08_BOTSDO04858(GTA08_BOTSDO04858);gene-GTA08_BOTSDO07931(GTA08_BOTSDO07931)	gene-GTA08_BOTSDO00110(GTA08_BOTSDO00110);gene-GTA08_BOTSDO00662(GTA08_BOTSDO00662);gene-GTA08_BOTSDO03853(GTA08_BOTSDO03853);gene-GTA08_BOTSDO08625(GTA08_BOTSDO08625)
GO:0009117	BP	nucleotide metabolic process	1	2	3	121	0.991135	1	gene-GTA08_BOTSDO11135(GTA08_BOTSDO11135)	gene-GTA08_BOTSDO00110(GTA08_BOTSDO00110);gene-GTA08_BOTSDO02221(GTA08_BOTSDO02221)
GO:0006753	BP	nucleoside phosphate metabolic process	1	2	3	122	0.991628	1	gene-GTA08_BOTSDO11135(GTA08_BOTSDO11135)	gene-GTA08_BOTSDO00110(GTA08_BOTSDO00110);gene-GTA08_BOTSDO02221(GTA08_BOTSDO02221)
GO:0045893	BP	positive regulation of transcription, DNA-templated	1	0	1	68	0.992091	1	gene-GTA08_BOTSDO00957(GTA08_BOTSDO00957)	-
GO:1902680	BP	positive regulation of RNA biosynthetic process	1	0	1	68	0.992091	1	gene-GTA08_BOTSDO00957(GTA08_BOTSDO00957)	-
GO:1903508	BP	positive regulation of nucleic acid-templated transcription	1	0	1	68	0.992091	1	gene-GTA08_BOTSDO00957(GTA08_BOTSDO00957)	-
GO:0051254	BP	positive regulation of RNA metabolic process	1	0	1	69	0.992637	1	gene-GTA08_BOTSDO00957(GTA08_BOTSDO00957)	-
GO:0061024	BP	membrane organization	0	1	1	70	0.993146	1	-	gene-GTA08_BOTSDO11023(GTA08_BOTSDO11023)
GO:0051603	BP	proteolysis involved in cellular protein catabolic process	1	1	2	100	0.993271	1	gene-GTA08_BOTSDO00957(GTA08_BOTSDO00957)	gene-GTA08_BOTSDO09127(GTA08_BOTSDO09127)
GO:0009108	BP	coenzyme biosynthetic process	1	0	1	71	0.99362	1	gene-GTA08_BOTSDO11135(GTA08_BOTSDO11135)	-
GO:0044257	BP	cellular protein catabolic process	1	1	2	101	0.993682	1	gene-GTA08_BOTSDO00957(GTA08_BOTSDO00957)	gene-GTA08_BOTSDO09127(GTA08_BOTSDO09127)
GO:0051640	BP	organelle localization	0	1	1	74	0.994854	1	-	gene-GTA08_BOTSDO09246(GTA08_BOTSDO09246)
GO:0045935	BP	positive regulation of nucleobase-containing compound metabolic process	1	0	1	75	0.99521	1	gene-GTA08_BOTSDO00957(GTA08_BOTSDO00957)	-
GO:0030163	BP	protein catabolic process	1	1	2	108	0.995947	1	gene-GTA08_BOTSDO00957(GTA08_BOTSDO00957)	gene-GTA08_BOTSDO09127(GTA08_BOTSDO09127)
GO:0044265	BP	cellular macromolecule catabolic process	1	3	4	161	0.996372	1	gene-GTA08_BOTSDO00957(GTA08_BOTSDO00957)	gene-GTA08_BOTSDO02133(GTA08_BOTSDO02133);gene-GTA08_BOTSDO09127(GTA08_BOTSDO09127);gene-GTA08_BOTSDO11445(GTA08_BOTSDO11445)
GO:0006644	BP	phospholipid metabolic process	0	1	1	79	0.996404	1	-	gene-GTA08_BOTSDO01769(GTA08_BOTSDO01769)
GO:0010557	BP	positive regulation of macromolecule biosynthetic process	1	0	1	81	0.996885	1	gene-GTA08_BOTSDO00957(GTA08_BOTSDO00957)	-
GO:0010628	BP	positive regulation of gene expression	1	0	1	81	0.996885	1	gene-GTA08_BOTSDO00957(GTA08_BOTSDO00957)	-
GO:0045892	BP	negative regulation of transcription, DNA-templated	1	0	1	82	0.997101	1	gene-GTA08_BOTSDO00957(GTA08_BOTSDO00957)	-
GO:0090501	BP	RNA phosphodiester bond hydrolysis	0	1	1	82	0.997101	1	-	gene-GTA08_BOTSDO04125(GTA08_BOTSDO04125)
GO:1902679	BP	negative regulation of RNA biosynthetic process	1	0	1	82	0.997101	1	gene-GTA08_BOTSDO00957(GTA08_BOTSDO00957)	-
GO:1903507	BP	negative regulation of nucleic acid-templated transcription	1	0	1	82	0.997101	1	gene-GTA08_BOTSDO00957(GTA08_BOTSDO00957)	-
GO:0016311	BP	dephosphorylation	0	1	1	83	0.997302	1	-	gene-GTA08_BOTSDO10061(GTA08_BOTSDO10061)
GO:0051253	BP	negative regulation of RNA metabolic process	1	0	1	84	0.997489	1	gene-GTA08_BOTSDO00957(GTA08_BOTSDO00957)	-
GO:0009891	BP	positive regulation of biosynthetic process	1	0	1	85	0.997663	1	gene-GTA08_BOTSDO00957(GTA08_BOTSDO00957)	-
GO:0031328	BP	positive regulation of cellular biosynthetic process	1	0	1	85	0.997663	1	gene-GTA08_BOTSDO00957(GTA08_BOTSDO00957)	-
GO:0090407	BP	organophosphate biosynthetic process	1	2	3	144	0.997687	1	gene-GTA08_BOTSDO11135(GTA08_BOTSDO11135)	gene-GTA08_BOTSDO00110(GTA08_BOTSDO00110);gene-GTA08_BOTSDO01769(GTA08_BOTSDO01769)
GO:0006732	BP	coenzyme metabolic process	1	0	1	88	0.998116	1	gene-GTA08_BOTSDO11135(GTA08_BOTSDO11135)	-
GO:1901137	BP	carbohydrate derivative biosynthetic process	1	1	2	121	0.998241	1	gene-GTA08_BOTSDO11135(GTA08_BOTSDO11135)	gene-GTA08_BOTSDO00110(GTA08_BOTSDO00110)
GO:0045934	BP	negative regulation of nucleobase-containing compound metabolic process	1	0	1	89	0.998246	1	gene-GTA08_BOTSDO00957(GTA08_BOTSDO00957)	-
GO:0006397	BP	mRNA processing	0	1	1	93	0.998685	1	-	gene-GTA08_BOTSDO11445(GTA08_BOTSDO11445)
GO:0006511	BP	ubiquitin-dependent protein catabolic process	1	0	1	93	0.998685	1	gene-GTA08_BOTSDO00957(GTA08_BOTSDO00957)	-
GO:0010558	BP	negative regulation of macromolecule biosynthetic process	1	0	1	93	0.998685	1	gene-GTA08_BOTSDO00957(GTA08_BOTSDO00957)	-
GO:2000113	BP	negative regulation of cellular macromolecule biosynthetic process	1	0	1	93	0.998685	1	gene-GTA08_BOTSDO00957(GTA08_BOTSDO00957)	-
GO:0019941	BP	modification-dependent protein catabolic process	1	0	1	94	0.998776	1	gene-GTA08_BOTSDO00957(GTA08_BOTSDO00957)	-
GO:0010629	BP	negative regulation of gene expression	1	1	2	127	0.998808	1	gene-GTA08_BOTSDO00957(GTA08_BOTSDO00957)	gene-GTA08_BOTSDO11445(GTA08_BOTSDO11445)
GO:1901135	BP	carbohydrate derivative metabolic process	1	4	5	206	0.998862	1	gene-GTA08_BOTSDO11135(GTA08_BOTSDO11135)	gene-GTA08_BOTSDO00110(GTA08_BOTSDO00110);gene-GTA08_BOTSDO02221(GTA08_BOTSDO02221);gene-GTA08_BOTSDO07545(GTA08_BOTSDO07545);gene-GTA08_BOTSDO13610(GTA08_BOTSDO13610)
GO:0055086	BP	nucleobase-containing small molecule metabolic process	1	2	3	159	0.999063	1	gene-GTA08_BOTSDO11135(GTA08_BOTSDO11135)	gene-GTA08_BOTSDO00110(GTA08_BOTSDO00110);gene-GTA08_BOTSDO02221(GTA08_BOTSDO02221)
GO:0009890	BP	negative regulation of biosynthetic process	1	0	1	99	0.999146	1	gene-GTA08_BOTSDO00957(GTA08_BOTSDO00957)	-
GO:0031327	BP	negative regulation of cellular biosynthetic process	1	0	1	99	0.999146	1	gene-GTA08_BOTSDO00957(GTA08_BOTSDO00957)	-
GO:0006281	BP	DNA repair	2	1	3	161	0.99917	1	gene-GTA08_BOTSDO00957(GTA08_BOTSDO00957);gene-GTA08_BOTSDO07779(GTA08_BOTSDO07779)	gene-GTA08_BOTSDO03722(GTA08_BOTSDO03722)
GO:0071702	BP	organic substance transport	3	11	14	408	0.999258	1	gene-GTA08_BOTSDO04858(GTA08_BOTSDO04858);gene-GTA08_BOTSDO06390(GTA08_BOTSDO06390);gene-GTA08_BOTSDO07931(GTA08_BOTSDO07931)	gene-GTA08_BOTSDO00393(GTA08_BOTSDO00393);gene-GTA08_BOTSDO01431(GTA08_BOTSDO01431);gene-GTA08_BOTSDO01505(GTA08_BOTSDO01505);gene-GTA08_BOTSDO03853(GTA08_BOTSDO03853);gene-GTA08_BOTSDO05301(GTA08_BOTSDO05301);gene-GTA08_BOTSDO05468(GTA08_BOTSDO05468);gene-GTA08_BOTSDO05743(GTA08_BOTSDO05743);gene-GTA08_BOTSDO07480(GTA08_BOTSDO07480);gene-GTA08_BOTSDO09350(GTA08_BOTSDO09350);gene-GTA08_BOTSDO1176…
GO:0043632	BP	modification-dependent macromolecule catabolic process	1	0	1	101	0.99926	1	gene-GTA08_BOTSDO00957(GTA08_BOTSDO00957)	-
GO:0051188	BP	cofactor biosynthetic process	1	0	1	106	0.999484	1	gene-GTA08_BOTSDO11135(GTA08_BOTSDO11135)	-
GO:0051186	BP	cofactor metabolic process	1	1	2	142	0.999554	1	gene-GTA08_BOTSDO11135(GTA08_BOTSDO11135)	gene-GTA08_BOTSDO12189(GTA08_BOTSDO12189)
GO:0051172	BP	negative regulation of nitrogen compound metabolic process	1	0	1	111	0.99964	1	gene-GTA08_BOTSDO00957(GTA08_BOTSDO00957)	-
GO:0019637	BP	organophosphate metabolic process	1	4	5	229	0.999683	1	gene-GTA08_BOTSDO11135(GTA08_BOTSDO11135)	gene-GTA08_BOTSDO00110(GTA08_BOTSDO00110);gene-GTA08_BOTSDO01769(GTA08_BOTSDO01769);gene-GTA08_BOTSDO02221(GTA08_BOTSDO02221);gene-GTA08_BOTSDO13610(GTA08_BOTSDO13610)
GO:0010605	BP	negative regulation of macromolecule metabolic process	1	1	2	149	0.999719	1	gene-GTA08_BOTSDO00957(GTA08_BOTSDO00957)	gene-GTA08_BOTSDO11445(GTA08_BOTSDO11445)
GO:0010604	BP	positive regulation of macromolecule metabolic process	1	0	1	116	0.999749	1	gene-GTA08_BOTSDO00957(GTA08_BOTSDO00957)	-
GO:0051173	BP	positive regulation of nitrogen compound metabolic process	1	0	1	117	0.999767	1	gene-GTA08_BOTSDO00957(GTA08_BOTSDO00957)	-
GO:0031324	BP	negative regulation of cellular metabolic process	1	0	1	118	0.999783	1	gene-GTA08_BOTSDO00957(GTA08_BOTSDO00957)	-
GO:0050896	BP	response to stimulus	13	8	21	576	0.999794	1	gene-GTA08_BOTSDO00957(GTA08_BOTSDO00957);gene-GTA08_BOTSDO01201(GTA08_BOTSDO01201);gene-GTA08_BOTSDO01432(GTA08_BOTSDO01432);gene-GTA08_BOTSDO03402(GTA08_BOTSDO03402);gene-GTA08_BOTSDO04384(GTA08_BOTSDO04384);gene-GTA08_BOTSDO06402(GTA08_BOTSDO06402);gene-GTA08_BOTSDO07275(GTA08_BOTSDO07275);gene-GTA08_BOTSDO07779(GTA08_BOTSDO07779);gene-GTA08_BOTSDO08362(GTA08_BOTSDO08362);gene-GTA08_BOTSDO1058…	gene-GTA08_BOTSDO01875(GTA08_BOTSDO01875);gene-GTA08_BOTSDO01877(GTA08_BOTSDO01877);gene-GTA08_BOTSDO02767(GTA08_BOTSDO02767);gene-GTA08_BOTSDO03722(GTA08_BOTSDO03722);gene-GTA08_BOTSDO04606(GTA08_BOTSDO04606);gene-GTA08_BOTSDO09766(GTA08_BOTSDO09766);gene-GTA08_BOTSDO10464(GTA08_BOTSDO10464);gene-GTA08_BOTSDO12189(GTA08_BOTSDO12189)
GO:0006974	BP	cellular response to DNA damage stimulus	2	1	3	186	0.999824	1	gene-GTA08_BOTSDO00957(GTA08_BOTSDO00957);gene-GTA08_BOTSDO07779(GTA08_BOTSDO07779)	gene-GTA08_BOTSDO03722(GTA08_BOTSDO03722)
GO:0009892	BP	negative regulation of metabolic process	1	1	2	157	0.999835	1	gene-GTA08_BOTSDO00957(GTA08_BOTSDO00957)	gene-GTA08_BOTSDO11445(GTA08_BOTSDO11445)
GO:0018193	BP	peptidyl-amino acid modification	0	1	1	124	0.999859	1	-	gene-GTA08_BOTSDO11300(GTA08_BOTSDO11300)
GO:0032268	BP	regulation of cellular protein metabolic process	1	0	1	125	0.999869	1	gene-GTA08_BOTSDO00957(GTA08_BOTSDO00957)	-
GO:0031325	BP	positive regulation of cellular metabolic process	1	0	1	126	0.999878	1	gene-GTA08_BOTSDO00957(GTA08_BOTSDO00957)	-
GO:0009893	BP	positive regulation of metabolic process	1	0	1	127	0.999887	1	gene-GTA08_BOTSDO00957(GTA08_BOTSDO00957)	-
GO:0016071	BP	mRNA metabolic process	0	1	1	127	0.999887	1	-	gene-GTA08_BOTSDO11445(GTA08_BOTSDO11445)
GO:0051246	BP	regulation of protein metabolic process	1	0	1	130	0.999909	1	gene-GTA08_BOTSDO00957(GTA08_BOTSDO00957)	-
GO:0033554	BP	cellular response to stress	4	1	5	280	0.999984	1	gene-GTA08_BOTSDO00957(GTA08_BOTSDO00957);gene-GTA08_BOTSDO07275(GTA08_BOTSDO07275);gene-GTA08_BOTSDO07779(GTA08_BOTSDO07779);gene-GTA08_BOTSDO11467(GTA08_BOTSDO11467)	gene-GTA08_BOTSDO03722(GTA08_BOTSDO03722)
GO:0051716	BP	cellular response to stimulus	7	8	15	515	0.999986	1	gene-GTA08_BOTSDO00957(GTA08_BOTSDO00957);gene-GTA08_BOTSDO01432(GTA08_BOTSDO01432);gene-GTA08_BOTSDO03402(GTA08_BOTSDO03402);gene-GTA08_BOTSDO07275(GTA08_BOTSDO07275);gene-GTA08_BOTSDO07779(GTA08_BOTSDO07779);gene-GTA08_BOTSDO11467(GTA08_BOTSDO11467);gene-GTA08_BOTSDO13964(GTA08_BOTSDO13964)	gene-GTA08_BOTSDO01875(GTA08_BOTSDO01875);gene-GTA08_BOTSDO01877(GTA08_BOTSDO01877);gene-GTA08_BOTSDO02767(GTA08_BOTSDO02767);gene-GTA08_BOTSDO03722(GTA08_BOTSDO03722);gene-GTA08_BOTSDO04606(GTA08_BOTSDO04606);gene-GTA08_BOTSDO09766(GTA08_BOTSDO09766);gene-GTA08_BOTSDO10464(GTA08_BOTSDO10464);gene-GTA08_BOTSDO12189(GTA08_BOTSDO12189)
GO:0016192	BP	vesicle-mediated transport	0	1	1	165	0.999993	1	-	gene-GTA08_BOTSDO09246(GTA08_BOTSDO09246)
GO:0046907	BP	intracellular transport	0	4	4	267	0.999993	1	-	gene-GTA08_BOTSDO05301(GTA08_BOTSDO05301);gene-GTA08_BOTSDO05670(GTA08_BOTSDO05670);gene-GTA08_BOTSDO08034(GTA08_BOTSDO08034);gene-GTA08_BOTSDO08265(GTA08_BOTSDO08265)
GO:0006357	BP	regulation of transcription by RNA polymerase II	2	1	3	239	0.999994	1	gene-GTA08_BOTSDO00957(GTA08_BOTSDO00957);gene-GTA08_BOTSDO09572(GTA08_BOTSDO09572)	gene-GTA08_BOTSDO05317(GTA08_BOTSDO05317)
GO:0034470	BP	ncRNA processing	0	1	1	168	0.999994	1	-	gene-GTA08_BOTSDO11445(GTA08_BOTSDO11445)
GO:0016310	BP	phosphorylation	2	4	6	326	0.999995	1	gene-GTA08_BOTSDO02119(GTA08_BOTSDO02119);gene-GTA08_BOTSDO11135(GTA08_BOTSDO11135)	gene-GTA08_BOTSDO04147(GTA08_BOTSDO04147);gene-GTA08_BOTSDO07933(GTA08_BOTSDO07933);gene-GTA08_BOTSDO09111(GTA08_BOTSDO09111);gene-GTA08_BOTSDO13610(GTA08_BOTSDO13610)
GO:0006259	BP	DNA metabolic process	3	2	5	300	0.999995	1	gene-GTA08_BOTSDO00957(GTA08_BOTSDO00957);gene-GTA08_BOTSDO05356(GTA08_BOTSDO05356);gene-GTA08_BOTSDO07779(GTA08_BOTSDO07779)	gene-GTA08_BOTSDO03722(GTA08_BOTSDO03722);gene-GTA08_BOTSDO05364(GTA08_BOTSDO05364)
GO:0051649	BP	establishment of localization in cell	0	4	4	282	0.999997	1	-	gene-GTA08_BOTSDO05301(GTA08_BOTSDO05301);gene-GTA08_BOTSDO05670(GTA08_BOTSDO05670);gene-GTA08_BOTSDO08034(GTA08_BOTSDO08034);gene-GTA08_BOTSDO08265(GTA08_BOTSDO08265)
GO:0048523	BP	negative regulation of cellular process	1	0	1	182	0.999998	1	gene-GTA08_BOTSDO00957(GTA08_BOTSDO00957)	-
GO:0048519	BP	negative regulation of biological process	1	1	2	224	0.999998	1	gene-GTA08_BOTSDO00957(GTA08_BOTSDO00957)	gene-GTA08_BOTSDO11445(GTA08_BOTSDO11445)
GO:0065008	BP	regulation of biological quality	1	0	1	190	0.999999	1	gene-GTA08_BOTSDO06692(GTA08_BOTSDO06692)	-
GO:0048522	BP	positive regulation of cellular process	1	0	1	192	0.999999	1	gene-GTA08_BOTSDO00957(GTA08_BOTSDO00957)	-
GO:0007165	BP	signal transduction	0	1	1	194	0.999999	1	-	gene-GTA08_BOTSDO04606(GTA08_BOTSDO04606)
GO:0023052	BP	signaling	0	1	1	194	0.999999	1	-	gene-GTA08_BOTSDO04606(GTA08_BOTSDO04606)
GO:0006366	BP	transcription by RNA polymerase II	2	1	3	269	0.999999	1	gene-GTA08_BOTSDO00957(GTA08_BOTSDO00957);gene-GTA08_BOTSDO09572(GTA08_BOTSDO09572)	gene-GTA08_BOTSDO05317(GTA08_BOTSDO05317)
GO:0048518	BP	positive regulation of biological process	1	0	1	195	0.999999	1	gene-GTA08_BOTSDO00957(GTA08_BOTSDO00957)	-
GO:1901564	BP	organonitrogen compound metabolic process	15	45	60	1450	1	1	gene-GTA08_BOTSDO00147(GTA08_BOTSDO00147);gene-GTA08_BOTSDO00957(GTA08_BOTSDO00957);gene-GTA08_BOTSDO02628(GTA08_BOTSDO02628);gene-GTA08_BOTSDO02702(GTA08_BOTSDO02702);gene-GTA08_BOTSDO03811(GTA08_BOTSDO03811);gene-GTA08_BOTSDO06780(GTA08_BOTSDO06780);gene-GTA08_BOTSDO07275(GTA08_BOTSDO07275);gene-GTA08_BOTSDO07298(GTA08_BOTSDO07298);gene-GTA08_BOTSDO07349(GTA08_BOTSDO07349);gene-GTA08_BOTSDO0772…	gene-GTA08_BOTSDO00110(GTA08_BOTSDO00110);gene-GTA08_BOTSDO00156(GTA08_BOTSDO00156);gene-GTA08_BOTSDO00195(GTA08_BOTSDO00195);gene-GTA08_BOTSDO00716(GTA08_BOTSDO00716);gene-GTA08_BOTSDO00884(GTA08_BOTSDO00884);gene-GTA08_BOTSDO01717(GTA08_BOTSDO01717);gene-GTA08_BOTSDO01758(GTA08_BOTSDO01758);gene-GTA08_BOTSDO01769(GTA08_BOTSDO01769);gene-GTA08_BOTSDO01872(GTA08_BOTSDO01872);gene-GTA08_BOTSDO0197…
GO:0007154	BP	cell communication	0	1	1	210	1	1	-	gene-GTA08_BOTSDO04606(GTA08_BOTSDO04606)
GO:0034660	BP	ncRNA metabolic process	0	1	1	222	1	1	-	gene-GTA08_BOTSDO11445(GTA08_BOTSDO11445)
GO:0006396	BP	RNA processing	1	1	2	272	1	1	gene-GTA08_BOTSDO05153(GTA08_BOTSDO05153)	gene-GTA08_BOTSDO11445(GTA08_BOTSDO11445)
GO:0051641	BP	cellular localization	0	5	5	371	1	1	-	gene-GTA08_BOTSDO05301(GTA08_BOTSDO05301);gene-GTA08_BOTSDO05670(GTA08_BOTSDO05670);gene-GTA08_BOTSDO08034(GTA08_BOTSDO08034);gene-GTA08_BOTSDO08265(GTA08_BOTSDO08265);gene-GTA08_BOTSDO09246(GTA08_BOTSDO09246)
GO:0006355	BP	regulation of transcription, DNA-templated	4	1	5	396	1	1	gene-GTA08_BOTSDO00957(GTA08_BOTSDO00957);gene-GTA08_BOTSDO08363(GTA08_BOTSDO08363);gene-GTA08_BOTSDO09070(GTA08_BOTSDO09070);gene-GTA08_BOTSDO09572(GTA08_BOTSDO09572)	gene-GTA08_BOTSDO05317(GTA08_BOTSDO05317)
GO:1903506	BP	regulation of nucleic acid-templated transcription	4	1	5	399	1	1	gene-GTA08_BOTSDO00957(GTA08_BOTSDO00957);gene-GTA08_BOTSDO08363(GTA08_BOTSDO08363);gene-GTA08_BOTSDO09070(GTA08_BOTSDO09070);gene-GTA08_BOTSDO09572(GTA08_BOTSDO09572)	gene-GTA08_BOTSDO05317(GTA08_BOTSDO05317)
GO:2001141	BP	regulation of RNA biosynthetic process	4	1	5	399	1	1	gene-GTA08_BOTSDO00957(GTA08_BOTSDO00957);gene-GTA08_BOTSDO08363(GTA08_BOTSDO08363);gene-GTA08_BOTSDO09070(GTA08_BOTSDO09070);gene-GTA08_BOTSDO09572(GTA08_BOTSDO09572)	gene-GTA08_BOTSDO05317(GTA08_BOTSDO05317)
GO:0051252	BP	regulation of RNA metabolic process	4	1	5	403	1	1	gene-GTA08_BOTSDO00957(GTA08_BOTSDO00957);gene-GTA08_BOTSDO08363(GTA08_BOTSDO08363);gene-GTA08_BOTSDO09070(GTA08_BOTSDO09070);gene-GTA08_BOTSDO09572(GTA08_BOTSDO09572)	gene-GTA08_BOTSDO05317(GTA08_BOTSDO05317)
GO:0019219	BP	regulation of nucleobase-containing compound metabolic process	4	1	5	414	1	1	gene-GTA08_BOTSDO00957(GTA08_BOTSDO00957);gene-GTA08_BOTSDO08363(GTA08_BOTSDO08363);gene-GTA08_BOTSDO09070(GTA08_BOTSDO09070);gene-GTA08_BOTSDO09572(GTA08_BOTSDO09572)	gene-GTA08_BOTSDO05317(GTA08_BOTSDO05317)
GO:0006796	BP	phosphate-containing compound metabolic process	2	8	10	552	1	1	gene-GTA08_BOTSDO02119(GTA08_BOTSDO02119);gene-GTA08_BOTSDO11135(GTA08_BOTSDO11135)	gene-GTA08_BOTSDO00110(GTA08_BOTSDO00110);gene-GTA08_BOTSDO01769(GTA08_BOTSDO01769);gene-GTA08_BOTSDO02221(GTA08_BOTSDO02221);gene-GTA08_BOTSDO04147(GTA08_BOTSDO04147);gene-GTA08_BOTSDO07933(GTA08_BOTSDO07933);gene-GTA08_BOTSDO09111(GTA08_BOTSDO09111);gene-GTA08_BOTSDO10061(GTA08_BOTSDO10061);gene-GTA08_BOTSDO13610(GTA08_BOTSDO13610)
GO:0006793	BP	phosphorus metabolic process	2	8	10	559	1	1	gene-GTA08_BOTSDO02119(GTA08_BOTSDO02119);gene-GTA08_BOTSDO11135(GTA08_BOTSDO11135)	gene-GTA08_BOTSDO00110(GTA08_BOTSDO00110);gene-GTA08_BOTSDO01769(GTA08_BOTSDO01769);gene-GTA08_BOTSDO02221(GTA08_BOTSDO02221);gene-GTA08_BOTSDO04147(GTA08_BOTSDO04147);gene-GTA08_BOTSDO07933(GTA08_BOTSDO07933);gene-GTA08_BOTSDO09111(GTA08_BOTSDO09111);gene-GTA08_BOTSDO10061(GTA08_BOTSDO10061);gene-GTA08_BOTSDO13610(GTA08_BOTSDO13610)
GO:0071705	BP	nitrogen compound transport	1	1	2	325	1	1	gene-GTA08_BOTSDO07931(GTA08_BOTSDO07931)	gene-GTA08_BOTSDO03853(GTA08_BOTSDO03853)
GO:0044238	BP	primary metabolic process	42	91	133	2802	1	1	gene-GTA08_BOTSDO00147(GTA08_BOTSDO00147);gene-GTA08_BOTSDO00957(GTA08_BOTSDO00957);gene-GTA08_BOTSDO01186(GTA08_BOTSDO01186);gene-GTA08_BOTSDO01243(GTA08_BOTSDO01243);gene-GTA08_BOTSDO01570(GTA08_BOTSDO01570);gene-GTA08_BOTSDO02628(GTA08_BOTSDO02628);gene-GTA08_BOTSDO02702(GTA08_BOTSDO02702);gene-GTA08_BOTSDO03811(GTA08_BOTSDO03811);gene-GTA08_BOTSDO05153(GTA08_BOTSDO05153);gene-GTA08_BOTSDO0518…	gene-GTA08_BOTSDO00110(GTA08_BOTSDO00110);gene-GTA08_BOTSDO00156(GTA08_BOTSDO00156);gene-GTA08_BOTSDO00195(GTA08_BOTSDO00195);gene-GTA08_BOTSDO00332(GTA08_BOTSDO00332);gene-GTA08_BOTSDO00383(GTA08_BOTSDO00383);gene-GTA08_BOTSDO00716(GTA08_BOTSDO00716);gene-GTA08_BOTSDO00884(GTA08_BOTSDO00884);gene-GTA08_BOTSDO01356(GTA08_BOTSDO01356);gene-GTA08_BOTSDO01758(GTA08_BOTSDO01758);gene-GTA08_BOTSDO0176…
GO:0010468	BP	regulation of gene expression	4	2	6	482	1	1	gene-GTA08_BOTSDO00957(GTA08_BOTSDO00957);gene-GTA08_BOTSDO08363(GTA08_BOTSDO08363);gene-GTA08_BOTSDO09070(GTA08_BOTSDO09070);gene-GTA08_BOTSDO09572(GTA08_BOTSDO09572)	gene-GTA08_BOTSDO05317(GTA08_BOTSDO05317);gene-GTA08_BOTSDO11445(GTA08_BOTSDO11445)
GO:0019538	BP	protein metabolic process	8	21	29	1027	1	1	gene-GTA08_BOTSDO00147(GTA08_BOTSDO00147);gene-GTA08_BOTSDO00957(GTA08_BOTSDO00957);gene-GTA08_BOTSDO02702(GTA08_BOTSDO02702);gene-GTA08_BOTSDO07275(GTA08_BOTSDO07275);gene-GTA08_BOTSDO07349(GTA08_BOTSDO07349);gene-GTA08_BOTSDO08711(GTA08_BOTSDO08711);gene-GTA08_BOTSDO09315(GTA08_BOTSDO09315);gene-GTA08_BOTSDO11467(GTA08_BOTSDO11467)	gene-GTA08_BOTSDO00884(GTA08_BOTSDO00884);gene-GTA08_BOTSDO01758(GTA08_BOTSDO01758);gene-GTA08_BOTSDO01872(GTA08_BOTSDO01872);gene-GTA08_BOTSDO01970(GTA08_BOTSDO01970);gene-GTA08_BOTSDO02339(GTA08_BOTSDO02339);gene-GTA08_BOTSDO03475(GTA08_BOTSDO03475);gene-GTA08_BOTSDO03981(GTA08_BOTSDO03981);gene-GTA08_BOTSDO04544(GTA08_BOTSDO04544);gene-GTA08_BOTSDO05396(GTA08_BOTSDO05396);gene-GTA08_BOTSDO0730…
GO:2000112	BP	regulation of cellular macromolecule biosynthetic process	4	1	5	459	1	1	gene-GTA08_BOTSDO00957(GTA08_BOTSDO00957);gene-GTA08_BOTSDO08363(GTA08_BOTSDO08363);gene-GTA08_BOTSDO09070(GTA08_BOTSDO09070);gene-GTA08_BOTSDO09572(GTA08_BOTSDO09572)	gene-GTA08_BOTSDO05317(GTA08_BOTSDO05317)
GO:0010556	BP	regulation of macromolecule biosynthetic process	4	1	5	463	1	1	gene-GTA08_BOTSDO00957(GTA08_BOTSDO00957);gene-GTA08_BOTSDO08363(GTA08_BOTSDO08363);gene-GTA08_BOTSDO09070(GTA08_BOTSDO09070);gene-GTA08_BOTSDO09572(GTA08_BOTSDO09572)	gene-GTA08_BOTSDO05317(GTA08_BOTSDO05317)
GO:0071704	BP	organic substance metabolic process	44	98	142	2979	1	1	gene-GTA08_BOTSDO00147(GTA08_BOTSDO00147);gene-GTA08_BOTSDO00957(GTA08_BOTSDO00957);gene-GTA08_BOTSDO01186(GTA08_BOTSDO01186);gene-GTA08_BOTSDO01243(GTA08_BOTSDO01243);gene-GTA08_BOTSDO01570(GTA08_BOTSDO01570);gene-GTA08_BOTSDO02628(GTA08_BOTSDO02628);gene-GTA08_BOTSDO02702(GTA08_BOTSDO02702);gene-GTA08_BOTSDO03811(GTA08_BOTSDO03811);gene-GTA08_BOTSDO04508(GTA08_BOTSDO04508);gene-GTA08_BOTSDO0515…	gene-GTA08_BOTSDO00110(GTA08_BOTSDO00110);gene-GTA08_BOTSDO00156(GTA08_BOTSDO00156);gene-GTA08_BOTSDO00195(GTA08_BOTSDO00195);gene-GTA08_BOTSDO00332(GTA08_BOTSDO00332);gene-GTA08_BOTSDO00383(GTA08_BOTSDO00383);gene-GTA08_BOTSDO00716(GTA08_BOTSDO00716);gene-GTA08_BOTSDO00884(GTA08_BOTSDO00884);gene-GTA08_BOTSDO01356(GTA08_BOTSDO01356);gene-GTA08_BOTSDO01717(GTA08_BOTSDO01717);gene-GTA08_BOTSDO0175…
GO:0009889	BP	regulation of biosynthetic process	4	1	5	474	1	1	gene-GTA08_BOTSDO00957(GTA08_BOTSDO00957);gene-GTA08_BOTSDO08363(GTA08_BOTSDO08363);gene-GTA08_BOTSDO09070(GTA08_BOTSDO09070);gene-GTA08_BOTSDO09572(GTA08_BOTSDO09572)	gene-GTA08_BOTSDO05317(GTA08_BOTSDO05317)
GO:0031326	BP	regulation of cellular biosynthetic process	4	1	5	474	1	1	gene-GTA08_BOTSDO00957(GTA08_BOTSDO00957);gene-GTA08_BOTSDO08363(GTA08_BOTSDO08363);gene-GTA08_BOTSDO09070(GTA08_BOTSDO09070);gene-GTA08_BOTSDO09572(GTA08_BOTSDO09572)	gene-GTA08_BOTSDO05317(GTA08_BOTSDO05317)
GO:1901566	BP	organonitrogen compound biosynthetic process	4	7	11	643	1	1	gene-GTA08_BOTSDO07298(GTA08_BOTSDO07298);gene-GTA08_BOTSDO07725(GTA08_BOTSDO07725);gene-GTA08_BOTSDO11135(GTA08_BOTSDO11135);gene-GTA08_BOTSDO11490(GTA08_BOTSDO11490)	gene-GTA08_BOTSDO00110(GTA08_BOTSDO00110);gene-GTA08_BOTSDO01769(GTA08_BOTSDO01769);gene-GTA08_BOTSDO04126(GTA08_BOTSDO04126);gene-GTA08_BOTSDO08260(GTA08_BOTSDO08260);gene-GTA08_BOTSDO09511(GTA08_BOTSDO09511);gene-GTA08_BOTSDO11714(GTA08_BOTSDO11714);gene-GTA08_BOTSDO11986(GTA08_BOTSDO11986)
GO:0006351	BP	transcription, DNA-templated	5	1	6	522	1	1	gene-GTA08_BOTSDO00957(GTA08_BOTSDO00957);gene-GTA08_BOTSDO08363(GTA08_BOTSDO08363);gene-GTA08_BOTSDO09070(GTA08_BOTSDO09070);gene-GTA08_BOTSDO09572(GTA08_BOTSDO09572);gene-GTA08_BOTSDO13895(GTA08_BOTSDO13895)	gene-GTA08_BOTSDO05317(GTA08_BOTSDO05317)
GO:0097659	BP	nucleic acid-templated transcription	5	1	6	527	1	1	gene-GTA08_BOTSDO00957(GTA08_BOTSDO00957);gene-GTA08_BOTSDO08363(GTA08_BOTSDO08363);gene-GTA08_BOTSDO09070(GTA08_BOTSDO09070);gene-GTA08_BOTSDO09572(GTA08_BOTSDO09572);gene-GTA08_BOTSDO13895(GTA08_BOTSDO13895)	gene-GTA08_BOTSDO05317(GTA08_BOTSDO05317)
GO:0032774	BP	RNA biosynthetic process	5	1	6	532	1	1	gene-GTA08_BOTSDO00957(GTA08_BOTSDO00957);gene-GTA08_BOTSDO08363(GTA08_BOTSDO08363);gene-GTA08_BOTSDO09070(GTA08_BOTSDO09070);gene-GTA08_BOTSDO09572(GTA08_BOTSDO09572);gene-GTA08_BOTSDO13895(GTA08_BOTSDO13895)	gene-GTA08_BOTSDO05317(GTA08_BOTSDO05317)
GO:0043603	BP	cellular amide metabolic process	2	0	2	398	1	1	gene-GTA08_BOTSDO03811(GTA08_BOTSDO03811);gene-GTA08_BOTSDO11135(GTA08_BOTSDO11135)	-
GO:0043604	BP	amide biosynthetic process	1	0	1	358	1	1	gene-GTA08_BOTSDO11135(GTA08_BOTSDO11135)	-
GO:0051171	BP	regulation of nitrogen compound metabolic process	4	1	5	521	1	1	gene-GTA08_BOTSDO00957(GTA08_BOTSDO00957);gene-GTA08_BOTSDO08363(GTA08_BOTSDO08363);gene-GTA08_BOTSDO09070(GTA08_BOTSDO09070);gene-GTA08_BOTSDO09572(GTA08_BOTSDO09572)	gene-GTA08_BOTSDO05317(GTA08_BOTSDO05317)
GO:0060255	BP	regulation of macromolecule metabolic process	4	2	6	559	1	1	gene-GTA08_BOTSDO00957(GTA08_BOTSDO00957);gene-GTA08_BOTSDO08363(GTA08_BOTSDO08363);gene-GTA08_BOTSDO09070(GTA08_BOTSDO09070);gene-GTA08_BOTSDO09572(GTA08_BOTSDO09572)	gene-GTA08_BOTSDO05317(GTA08_BOTSDO05317);gene-GTA08_BOTSDO11445(GTA08_BOTSDO11445)
GO:0019438	BP	aromatic compound biosynthetic process	6	6	12	731	1	1	gene-GTA08_BOTSDO00957(GTA08_BOTSDO00957);gene-GTA08_BOTSDO08363(GTA08_BOTSDO08363);gene-GTA08_BOTSDO09070(GTA08_BOTSDO09070);gene-GTA08_BOTSDO09572(GTA08_BOTSDO09572);gene-GTA08_BOTSDO11135(GTA08_BOTSDO11135);gene-GTA08_BOTSDO13895(GTA08_BOTSDO13895)	gene-GTA08_BOTSDO00110(GTA08_BOTSDO00110);gene-GTA08_BOTSDO00716(GTA08_BOTSDO00716);gene-GTA08_BOTSDO02221(GTA08_BOTSDO02221);gene-GTA08_BOTSDO04126(GTA08_BOTSDO04126);gene-GTA08_BOTSDO05317(GTA08_BOTSDO05317);gene-GTA08_BOTSDO09837(GTA08_BOTSDO09837)
GO:0080090	BP	regulation of primary metabolic process	4	1	5	535	1	1	gene-GTA08_BOTSDO00957(GTA08_BOTSDO00957);gene-GTA08_BOTSDO08363(GTA08_BOTSDO08363);gene-GTA08_BOTSDO09070(GTA08_BOTSDO09070);gene-GTA08_BOTSDO09572(GTA08_BOTSDO09572)	gene-GTA08_BOTSDO05317(GTA08_BOTSDO05317)
GO:0034654	BP	nucleobase-containing compound biosynthetic process	6	3	9	665	1	1	gene-GTA08_BOTSDO00957(GTA08_BOTSDO00957);gene-GTA08_BOTSDO08363(GTA08_BOTSDO08363);gene-GTA08_BOTSDO09070(GTA08_BOTSDO09070);gene-GTA08_BOTSDO09572(GTA08_BOTSDO09572);gene-GTA08_BOTSDO11135(GTA08_BOTSDO11135);gene-GTA08_BOTSDO13895(GTA08_BOTSDO13895)	gene-GTA08_BOTSDO00110(GTA08_BOTSDO00110);gene-GTA08_BOTSDO02221(GTA08_BOTSDO02221);gene-GTA08_BOTSDO05317(GTA08_BOTSDO05317)
GO:0031323	BP	regulation of cellular metabolic process	4	1	5	545	1	1	gene-GTA08_BOTSDO00957(GTA08_BOTSDO00957);gene-GTA08_BOTSDO08363(GTA08_BOTSDO08363);gene-GTA08_BOTSDO09070(GTA08_BOTSDO09070);gene-GTA08_BOTSDO09572(GTA08_BOTSDO09572)	gene-GTA08_BOTSDO05317(GTA08_BOTSDO05317)
GO:1901362	BP	organic cyclic compound biosynthetic process	6	7	13	772	1	1	gene-GTA08_BOTSDO00957(GTA08_BOTSDO00957);gene-GTA08_BOTSDO08363(GTA08_BOTSDO08363);gene-GTA08_BOTSDO09070(GTA08_BOTSDO09070);gene-GTA08_BOTSDO09572(GTA08_BOTSDO09572);gene-GTA08_BOTSDO11135(GTA08_BOTSDO11135);gene-GTA08_BOTSDO13895(GTA08_BOTSDO13895)	gene-GTA08_BOTSDO00110(GTA08_BOTSDO00110);gene-GTA08_BOTSDO00716(GTA08_BOTSDO00716);gene-GTA08_BOTSDO02221(GTA08_BOTSDO02221);gene-GTA08_BOTSDO04126(GTA08_BOTSDO04126);gene-GTA08_BOTSDO05317(GTA08_BOTSDO05317);gene-GTA08_BOTSDO09511(GTA08_BOTSDO09511);gene-GTA08_BOTSDO09837(GTA08_BOTSDO09837)
GO:0019222	BP	regulation of metabolic process	4	2	6	582	1	1	gene-GTA08_BOTSDO00957(GTA08_BOTSDO00957);gene-GTA08_BOTSDO08363(GTA08_BOTSDO08363);gene-GTA08_BOTSDO09070(GTA08_BOTSDO09070);gene-GTA08_BOTSDO09572(GTA08_BOTSDO09572)	gene-GTA08_BOTSDO05317(GTA08_BOTSDO05317);gene-GTA08_BOTSDO11445(GTA08_BOTSDO11445)
GO:0006464	BP	cellular protein modification process	0	2	2	452	1	1	-	gene-GTA08_BOTSDO01872(GTA08_BOTSDO01872);gene-GTA08_BOTSDO11300(GTA08_BOTSDO11300)
GO:0036211	BP	protein modification process	0	2	2	452	1	1	-	gene-GTA08_BOTSDO01872(GTA08_BOTSDO01872);gene-GTA08_BOTSDO11300(GTA08_BOTSDO11300)
GO:0018130	BP	heterocycle biosynthetic process	6	5	11	742	1	1	gene-GTA08_BOTSDO00957(GTA08_BOTSDO00957);gene-GTA08_BOTSDO08363(GTA08_BOTSDO08363);gene-GTA08_BOTSDO09070(GTA08_BOTSDO09070);gene-GTA08_BOTSDO09572(GTA08_BOTSDO09572);gene-GTA08_BOTSDO11135(GTA08_BOTSDO11135);gene-GTA08_BOTSDO13895(GTA08_BOTSDO13895)	gene-GTA08_BOTSDO00110(GTA08_BOTSDO00110);gene-GTA08_BOTSDO02221(GTA08_BOTSDO02221);gene-GTA08_BOTSDO04126(GTA08_BOTSDO04126);gene-GTA08_BOTSDO05317(GTA08_BOTSDO05317);gene-GTA08_BOTSDO09511(GTA08_BOTSDO09511)
GO:0043412	BP	macromolecule modification	0	2	2	517	1	1	-	gene-GTA08_BOTSDO01872(GTA08_BOTSDO01872);gene-GTA08_BOTSDO11300(GTA08_BOTSDO11300)
GO:0006139	BP	nucleobase-containing compound metabolic process	9	8	17	1272	1	1	gene-GTA08_BOTSDO00957(GTA08_BOTSDO00957);gene-GTA08_BOTSDO05153(GTA08_BOTSDO05153);gene-GTA08_BOTSDO05356(GTA08_BOTSDO05356);gene-GTA08_BOTSDO07779(GTA08_BOTSDO07779);gene-GTA08_BOTSDO08363(GTA08_BOTSDO08363);gene-GTA08_BOTSDO09070(GTA08_BOTSDO09070);gene-GTA08_BOTSDO09572(GTA08_BOTSDO09572);gene-GTA08_BOTSDO11135(GTA08_BOTSDO11135);gene-GTA08_BOTSDO13895(GTA08_BOTSDO13895)	gene-GTA08_BOTSDO00110(GTA08_BOTSDO00110);gene-GTA08_BOTSDO02221(GTA08_BOTSDO02221);gene-GTA08_BOTSDO03722(GTA08_BOTSDO03722);gene-GTA08_BOTSDO04125(GTA08_BOTSDO04125);gene-GTA08_BOTSDO05317(GTA08_BOTSDO05317);gene-GTA08_BOTSDO05364(GTA08_BOTSDO05364);gene-GTA08_BOTSDO10643(GTA08_BOTSDO10643);gene-GTA08_BOTSDO11445(GTA08_BOTSDO11445)
GO:0006725	BP	cellular aromatic compound metabolic process	9	19	28	1386	1	1	gene-GTA08_BOTSDO00957(GTA08_BOTSDO00957);gene-GTA08_BOTSDO05153(GTA08_BOTSDO05153);gene-GTA08_BOTSDO05356(GTA08_BOTSDO05356);gene-GTA08_BOTSDO07779(GTA08_BOTSDO07779);gene-GTA08_BOTSDO08363(GTA08_BOTSDO08363);gene-GTA08_BOTSDO09070(GTA08_BOTSDO09070);gene-GTA08_BOTSDO09572(GTA08_BOTSDO09572);gene-GTA08_BOTSDO11135(GTA08_BOTSDO11135);gene-GTA08_BOTSDO13895(GTA08_BOTSDO13895)	gene-GTA08_BOTSDO00110(GTA08_BOTSDO00110);gene-GTA08_BOTSDO00195(GTA08_BOTSDO00195);gene-GTA08_BOTSDO00716(GTA08_BOTSDO00716);gene-GTA08_BOTSDO02221(GTA08_BOTSDO02221);gene-GTA08_BOTSDO03722(GTA08_BOTSDO03722);gene-GTA08_BOTSDO04125(GTA08_BOTSDO04125);gene-GTA08_BOTSDO04126(GTA08_BOTSDO04126);gene-GTA08_BOTSDO05317(GTA08_BOTSDO05317);gene-GTA08_BOTSDO05364(GTA08_BOTSDO05364);gene-GTA08_BOTSDO0547…
GO:0006807	BP	nitrogen compound metabolic process	22	56	78	2392	1	1	gene-GTA08_BOTSDO00147(GTA08_BOTSDO00147);gene-GTA08_BOTSDO00957(GTA08_BOTSDO00957);gene-GTA08_BOTSDO02628(GTA08_BOTSDO02628);gene-GTA08_BOTSDO02702(GTA08_BOTSDO02702);gene-GTA08_BOTSDO03811(GTA08_BOTSDO03811);gene-GTA08_BOTSDO05153(GTA08_BOTSDO05153);gene-GTA08_BOTSDO05356(GTA08_BOTSDO05356);gene-GTA08_BOTSDO06780(GTA08_BOTSDO06780);gene-GTA08_BOTSDO07275(GTA08_BOTSDO07275);gene-GTA08_BOTSDO0729…	gene-GTA08_BOTSDO00110(GTA08_BOTSDO00110);gene-GTA08_BOTSDO00156(GTA08_BOTSDO00156);gene-GTA08_BOTSDO00195(GTA08_BOTSDO00195);gene-GTA08_BOTSDO00716(GTA08_BOTSDO00716);gene-GTA08_BOTSDO00884(GTA08_BOTSDO00884);gene-GTA08_BOTSDO01717(GTA08_BOTSDO01717);gene-GTA08_BOTSDO01758(GTA08_BOTSDO01758);gene-GTA08_BOTSDO01769(GTA08_BOTSDO01769);gene-GTA08_BOTSDO01872(GTA08_BOTSDO01872);gene-GTA08_BOTSDO0197…
GO:0008150	BP	biological_process	123	284	407	5958	1	1	gene-GTA08_BOTSDO00147(GTA08_BOTSDO00147);gene-GTA08_BOTSDO00218(GTA08_BOTSDO00218);gene-GTA08_BOTSDO00398(GTA08_BOTSDO00398);gene-GTA08_BOTSDO00957(GTA08_BOTSDO00957);gene-GTA08_BOTSDO01186(GTA08_BOTSDO01186);gene-GTA08_BOTSDO01194(GTA08_BOTSDO01194);gene-GTA08_BOTSDO01196(GTA08_BOTSDO01196);gene-GTA08_BOTSDO01201(GTA08_BOTSDO01201);gene-GTA08_BOTSDO01243(GTA08_BOTSDO01243);gene-GTA08_BOTSDO0143…	gene-GTA08_BOTSDO00110(GTA08_BOTSDO00110);gene-GTA08_BOTSDO00156(GTA08_BOTSDO00156);gene-GTA08_BOTSDO00195(GTA08_BOTSDO00195);gene-GTA08_BOTSDO00332(GTA08_BOTSDO00332);gene-GTA08_BOTSDO00341(GTA08_BOTSDO00341);gene-GTA08_BOTSDO00371(GTA08_BOTSDO00371);gene-GTA08_BOTSDO00383(GTA08_BOTSDO00383);gene-GTA08_BOTSDO00393(GTA08_BOTSDO00393);gene-GTA08_BOTSDO00477(GTA08_BOTSDO00477);gene-GTA08_BOTSDO0053…
GO:0009058	BP	biosynthetic process	15	15	30	1423	1	1	gene-GTA08_BOTSDO00957(GTA08_BOTSDO00957);gene-GTA08_BOTSDO01186(GTA08_BOTSDO01186);gene-GTA08_BOTSDO02628(GTA08_BOTSDO02628);gene-GTA08_BOTSDO06380(GTA08_BOTSDO06380);gene-GTA08_BOTSDO07298(GTA08_BOTSDO07298);gene-GTA08_BOTSDO07725(GTA08_BOTSDO07725);gene-GTA08_BOTSDO08188(GTA08_BOTSDO08188);gene-GTA08_BOTSDO08363(GTA08_BOTSDO08363);gene-GTA08_BOTSDO09070(GTA08_BOTSDO09070);gene-GTA08_BOTSDO0957…	gene-GTA08_BOTSDO00110(GTA08_BOTSDO00110);gene-GTA08_BOTSDO00716(GTA08_BOTSDO00716);gene-GTA08_BOTSDO01769(GTA08_BOTSDO01769);gene-GTA08_BOTSDO02221(GTA08_BOTSDO02221);gene-GTA08_BOTSDO02849(GTA08_BOTSDO02849);gene-GTA08_BOTSDO04126(GTA08_BOTSDO04126);gene-GTA08_BOTSDO05317(GTA08_BOTSDO05317);gene-GTA08_BOTSDO08260(GTA08_BOTSDO08260);gene-GTA08_BOTSDO08782(GTA08_BOTSDO08782);gene-GTA08_BOTSDO0951…
GO:0009059	BP	macromolecule biosynthetic process	5	3	8	982	1	1	gene-GTA08_BOTSDO00957(GTA08_BOTSDO00957);gene-GTA08_BOTSDO08363(GTA08_BOTSDO08363);gene-GTA08_BOTSDO09070(GTA08_BOTSDO09070);gene-GTA08_BOTSDO09572(GTA08_BOTSDO09572);gene-GTA08_BOTSDO13895(GTA08_BOTSDO13895)	gene-GTA08_BOTSDO02849(GTA08_BOTSDO02849);gene-GTA08_BOTSDO05317(GTA08_BOTSDO05317);gene-GTA08_BOTSDO09584(GTA08_BOTSDO09584)
GO:0009987	BP	cellular process	52	107	159	4003	1	1	gene-GTA08_BOTSDO00218(GTA08_BOTSDO00218);gene-GTA08_BOTSDO00957(GTA08_BOTSDO00957);gene-GTA08_BOTSDO01186(GTA08_BOTSDO01186);gene-GTA08_BOTSDO01432(GTA08_BOTSDO01432);gene-GTA08_BOTSDO02119(GTA08_BOTSDO02119);gene-GTA08_BOTSDO02626(GTA08_BOTSDO02626);gene-GTA08_BOTSDO02628(GTA08_BOTSDO02628);gene-GTA08_BOTSDO02654(GTA08_BOTSDO02654);gene-GTA08_BOTSDO02880(GTA08_BOTSDO02880);gene-GTA08_BOTSDO0337…	gene-GTA08_BOTSDO00110(GTA08_BOTSDO00110);gene-GTA08_BOTSDO00156(GTA08_BOTSDO00156);gene-GTA08_BOTSDO00195(GTA08_BOTSDO00195);gene-GTA08_BOTSDO00393(GTA08_BOTSDO00393);gene-GTA08_BOTSDO00567(GTA08_BOTSDO00567);gene-GTA08_BOTSDO00662(GTA08_BOTSDO00662);gene-GTA08_BOTSDO00716(GTA08_BOTSDO00716);gene-GTA08_BOTSDO01248(GTA08_BOTSDO01248);gene-GTA08_BOTSDO01346(GTA08_BOTSDO01346);gene-GTA08_BOTSDO0143…
GO:0010467	BP	gene expression	6	2	8	1112	1	1	gene-GTA08_BOTSDO00957(GTA08_BOTSDO00957);gene-GTA08_BOTSDO05153(GTA08_BOTSDO05153);gene-GTA08_BOTSDO08363(GTA08_BOTSDO08363);gene-GTA08_BOTSDO09070(GTA08_BOTSDO09070);gene-GTA08_BOTSDO09572(GTA08_BOTSDO09572);gene-GTA08_BOTSDO13895(GTA08_BOTSDO13895)	gene-GTA08_BOTSDO05317(GTA08_BOTSDO05317);gene-GTA08_BOTSDO11445(GTA08_BOTSDO11445)
GO:0016043	BP	cellular component organization	2	1	3	707	1	1	gene-GTA08_BOTSDO06692(GTA08_BOTSDO06692);gene-GTA08_BOTSDO11906(GTA08_BOTSDO11906)	gene-GTA08_BOTSDO11023(GTA08_BOTSDO11023)
GO:0016070	BP	RNA metabolic process	6	3	9	881	1	1	gene-GTA08_BOTSDO00957(GTA08_BOTSDO00957);gene-GTA08_BOTSDO05153(GTA08_BOTSDO05153);gene-GTA08_BOTSDO08363(GTA08_BOTSDO08363);gene-GTA08_BOTSDO09070(GTA08_BOTSDO09070);gene-GTA08_BOTSDO09572(GTA08_BOTSDO09572);gene-GTA08_BOTSDO13895(GTA08_BOTSDO13895)	gene-GTA08_BOTSDO04125(GTA08_BOTSDO04125);gene-GTA08_BOTSDO05317(GTA08_BOTSDO05317);gene-GTA08_BOTSDO11445(GTA08_BOTSDO11445)
GO:0034641	BP	cellular nitrogen compound metabolic process	10	11	21	1624	1	1	gene-GTA08_BOTSDO00957(GTA08_BOTSDO00957);gene-GTA08_BOTSDO03811(GTA08_BOTSDO03811);gene-GTA08_BOTSDO05153(GTA08_BOTSDO05153);gene-GTA08_BOTSDO05356(GTA08_BOTSDO05356);gene-GTA08_BOTSDO07779(GTA08_BOTSDO07779);gene-GTA08_BOTSDO08363(GTA08_BOTSDO08363);gene-GTA08_BOTSDO09070(GTA08_BOTSDO09070);gene-GTA08_BOTSDO09572(GTA08_BOTSDO09572);gene-GTA08_BOTSDO11135(GTA08_BOTSDO11135);gene-GTA08_BOTSDO1389…	gene-GTA08_BOTSDO00110(GTA08_BOTSDO00110);gene-GTA08_BOTSDO02221(GTA08_BOTSDO02221);gene-GTA08_BOTSDO03722(GTA08_BOTSDO03722);gene-GTA08_BOTSDO04125(GTA08_BOTSDO04125);gene-GTA08_BOTSDO04126(GTA08_BOTSDO04126);gene-GTA08_BOTSDO05317(GTA08_BOTSDO05317);gene-GTA08_BOTSDO05364(GTA08_BOTSDO05364);gene-GTA08_BOTSDO05670(GTA08_BOTSDO05670);gene-GTA08_BOTSDO08000(GTA08_BOTSDO08000);gene-GTA08_BOTSDO1064…
GO:0034645	BP	cellular macromolecule biosynthetic process	5	1	6	965	1	1	gene-GTA08_BOTSDO00957(GTA08_BOTSDO00957);gene-GTA08_BOTSDO08363(GTA08_BOTSDO08363);gene-GTA08_BOTSDO09070(GTA08_BOTSDO09070);gene-GTA08_BOTSDO09572(GTA08_BOTSDO09572);gene-GTA08_BOTSDO13895(GTA08_BOTSDO13895)	gene-GTA08_BOTSDO05317(GTA08_BOTSDO05317)
GO:0043170	BP	macromolecule metabolic process	17	34	51	2042	1	1	gene-GTA08_BOTSDO00147(GTA08_BOTSDO00147);gene-GTA08_BOTSDO00957(GTA08_BOTSDO00957);gene-GTA08_BOTSDO02702(GTA08_BOTSDO02702);gene-GTA08_BOTSDO05153(GTA08_BOTSDO05153);gene-GTA08_BOTSDO05356(GTA08_BOTSDO05356);gene-GTA08_BOTSDO07275(GTA08_BOTSDO07275);gene-GTA08_BOTSDO07349(GTA08_BOTSDO07349);gene-GTA08_BOTSDO07779(GTA08_BOTSDO07779);gene-GTA08_BOTSDO08363(GTA08_BOTSDO08363);gene-GTA08_BOTSDO0871…	gene-GTA08_BOTSDO00884(GTA08_BOTSDO00884);gene-GTA08_BOTSDO01758(GTA08_BOTSDO01758);gene-GTA08_BOTSDO01872(GTA08_BOTSDO01872);gene-GTA08_BOTSDO01970(GTA08_BOTSDO01970);gene-GTA08_BOTSDO02133(GTA08_BOTSDO02133);gene-GTA08_BOTSDO02339(GTA08_BOTSDO02339);gene-GTA08_BOTSDO02849(GTA08_BOTSDO02849);gene-GTA08_BOTSDO03475(GTA08_BOTSDO03475);gene-GTA08_BOTSDO03722(GTA08_BOTSDO03722);gene-GTA08_BOTSDO0398…
GO:0044237	BP	cellular metabolic process	24	46	70	2610	1	1	gene-GTA08_BOTSDO00957(GTA08_BOTSDO00957);gene-GTA08_BOTSDO01186(GTA08_BOTSDO01186);gene-GTA08_BOTSDO02119(GTA08_BOTSDO02119);gene-GTA08_BOTSDO02628(GTA08_BOTSDO02628);gene-GTA08_BOTSDO03811(GTA08_BOTSDO03811);gene-GTA08_BOTSDO04508(GTA08_BOTSDO04508);gene-GTA08_BOTSDO05153(GTA08_BOTSDO05153);gene-GTA08_BOTSDO05356(GTA08_BOTSDO05356);gene-GTA08_BOTSDO06780(GTA08_BOTSDO06780);gene-GTA08_BOTSDO0729…	gene-GTA08_BOTSDO00110(GTA08_BOTSDO00110);gene-GTA08_BOTSDO00156(GTA08_BOTSDO00156);gene-GTA08_BOTSDO00195(GTA08_BOTSDO00195);gene-GTA08_BOTSDO00716(GTA08_BOTSDO00716);gene-GTA08_BOTSDO01769(GTA08_BOTSDO01769);gene-GTA08_BOTSDO01872(GTA08_BOTSDO01872);gene-GTA08_BOTSDO01981(GTA08_BOTSDO01981);gene-GTA08_BOTSDO02133(GTA08_BOTSDO02133);gene-GTA08_BOTSDO02221(GTA08_BOTSDO02221);gene-GTA08_BOTSDO0357…
GO:0044249	BP	cellular biosynthetic process	12	11	23	1349	1	1	gene-GTA08_BOTSDO00957(GTA08_BOTSDO00957);gene-GTA08_BOTSDO01186(GTA08_BOTSDO01186);gene-GTA08_BOTSDO07298(GTA08_BOTSDO07298);gene-GTA08_BOTSDO07725(GTA08_BOTSDO07725);gene-GTA08_BOTSDO08363(GTA08_BOTSDO08363);gene-GTA08_BOTSDO09070(GTA08_BOTSDO09070);gene-GTA08_BOTSDO09572(GTA08_BOTSDO09572);gene-GTA08_BOTSDO09619(GTA08_BOTSDO09619);gene-GTA08_BOTSDO11135(GTA08_BOTSDO11135);gene-GTA08_BOTSDO1149…	gene-GTA08_BOTSDO00110(GTA08_BOTSDO00110);gene-GTA08_BOTSDO00716(GTA08_BOTSDO00716);gene-GTA08_BOTSDO01769(GTA08_BOTSDO01769);gene-GTA08_BOTSDO02221(GTA08_BOTSDO02221);gene-GTA08_BOTSDO04126(GTA08_BOTSDO04126);gene-GTA08_BOTSDO05317(GTA08_BOTSDO05317);gene-GTA08_BOTSDO08260(GTA08_BOTSDO08260);gene-GTA08_BOTSDO09511(GTA08_BOTSDO09511);gene-GTA08_BOTSDO09837(GTA08_BOTSDO09837);gene-GTA08_BOTSDO1171…
GO:0044260	BP	cellular macromolecule metabolic process	9	9	18	1587	1	1	gene-GTA08_BOTSDO00957(GTA08_BOTSDO00957);gene-GTA08_BOTSDO05356(GTA08_BOTSDO05356);gene-GTA08_BOTSDO07779(GTA08_BOTSDO07779);gene-GTA08_BOTSDO08363(GTA08_BOTSDO08363);gene-GTA08_BOTSDO09070(GTA08_BOTSDO09070);gene-GTA08_BOTSDO09572(GTA08_BOTSDO09572);gene-GTA08_BOTSDO10386(GTA08_BOTSDO10386);gene-GTA08_BOTSDO10907(GTA08_BOTSDO10907);gene-GTA08_BOTSDO13895(GTA08_BOTSDO13895)	gene-GTA08_BOTSDO01872(GTA08_BOTSDO01872);gene-GTA08_BOTSDO02133(GTA08_BOTSDO02133);gene-GTA08_BOTSDO03722(GTA08_BOTSDO03722);gene-GTA08_BOTSDO05317(GTA08_BOTSDO05317);gene-GTA08_BOTSDO05364(GTA08_BOTSDO05364);gene-GTA08_BOTSDO08820(GTA08_BOTSDO08820);gene-GTA08_BOTSDO09127(GTA08_BOTSDO09127);gene-GTA08_BOTSDO11300(GTA08_BOTSDO11300);gene-GTA08_BOTSDO11445(GTA08_BOTSDO11445)
GO:0044267	BP	cellular protein metabolic process	1	3	4	840	1	1	gene-GTA08_BOTSDO00957(GTA08_BOTSDO00957)	gene-GTA08_BOTSDO01872(GTA08_BOTSDO01872);gene-GTA08_BOTSDO09127(GTA08_BOTSDO09127);gene-GTA08_BOTSDO11300(GTA08_BOTSDO11300)
GO:0044271	BP	cellular nitrogen compound biosynthetic process	6	3	9	1034	1	1	gene-GTA08_BOTSDO00957(GTA08_BOTSDO00957);gene-GTA08_BOTSDO08363(GTA08_BOTSDO08363);gene-GTA08_BOTSDO09070(GTA08_BOTSDO09070);gene-GTA08_BOTSDO09572(GTA08_BOTSDO09572);gene-GTA08_BOTSDO11135(GTA08_BOTSDO11135);gene-GTA08_BOTSDO13895(GTA08_BOTSDO13895)	gene-GTA08_BOTSDO00110(GTA08_BOTSDO00110);gene-GTA08_BOTSDO02221(GTA08_BOTSDO02221);gene-GTA08_BOTSDO05317(GTA08_BOTSDO05317)
GO:0046483	BP	heterocycle metabolic process	10	11	21	1364	1	1	gene-GTA08_BOTSDO00957(GTA08_BOTSDO00957);gene-GTA08_BOTSDO05153(GTA08_BOTSDO05153);gene-GTA08_BOTSDO05356(GTA08_BOTSDO05356);gene-GTA08_BOTSDO06780(GTA08_BOTSDO06780);gene-GTA08_BOTSDO07779(GTA08_BOTSDO07779);gene-GTA08_BOTSDO08363(GTA08_BOTSDO08363);gene-GTA08_BOTSDO09070(GTA08_BOTSDO09070);gene-GTA08_BOTSDO09572(GTA08_BOTSDO09572);gene-GTA08_BOTSDO11135(GTA08_BOTSDO11135);gene-GTA08_BOTSDO1389…	gene-GTA08_BOTSDO00110(GTA08_BOTSDO00110);gene-GTA08_BOTSDO02221(GTA08_BOTSDO02221);gene-GTA08_BOTSDO03722(GTA08_BOTSDO03722);gene-GTA08_BOTSDO04125(GTA08_BOTSDO04125);gene-GTA08_BOTSDO04126(GTA08_BOTSDO04126);gene-GTA08_BOTSDO05317(GTA08_BOTSDO05317);gene-GTA08_BOTSDO05364(GTA08_BOTSDO05364);gene-GTA08_BOTSDO05670(GTA08_BOTSDO05670);gene-GTA08_BOTSDO09511(GTA08_BOTSDO09511);gene-GTA08_BOTSDO1064…
GO:0050789	BP	regulation of biological process	4	3	7	859	1	1	gene-GTA08_BOTSDO00957(GTA08_BOTSDO00957);gene-GTA08_BOTSDO08363(GTA08_BOTSDO08363);gene-GTA08_BOTSDO09070(GTA08_BOTSDO09070);gene-GTA08_BOTSDO09572(GTA08_BOTSDO09572)	gene-GTA08_BOTSDO04606(GTA08_BOTSDO04606);gene-GTA08_BOTSDO05317(GTA08_BOTSDO05317);gene-GTA08_BOTSDO11445(GTA08_BOTSDO11445)
GO:0050794	BP	regulation of cellular process	4	2	6	815	1	1	gene-GTA08_BOTSDO00957(GTA08_BOTSDO00957);gene-GTA08_BOTSDO08363(GTA08_BOTSDO08363);gene-GTA08_BOTSDO09070(GTA08_BOTSDO09070);gene-GTA08_BOTSDO09572(GTA08_BOTSDO09572)	gene-GTA08_BOTSDO04606(GTA08_BOTSDO04606);gene-GTA08_BOTSDO05317(GTA08_BOTSDO05317)
GO:0065007	BP	biological regulation	5	3	8	994	1	1	gene-GTA08_BOTSDO00957(GTA08_BOTSDO00957);gene-GTA08_BOTSDO06692(GTA08_BOTSDO06692);gene-GTA08_BOTSDO08363(GTA08_BOTSDO08363);gene-GTA08_BOTSDO09070(GTA08_BOTSDO09070);gene-GTA08_BOTSDO09572(GTA08_BOTSDO09572)	gene-GTA08_BOTSDO04606(GTA08_BOTSDO04606);gene-GTA08_BOTSDO05317(GTA08_BOTSDO05317);gene-GTA08_BOTSDO11445(GTA08_BOTSDO11445)
GO:0071840	BP	cellular component organization or biogenesis	2	1	3	828	1	1	gene-GTA08_BOTSDO06692(GTA08_BOTSDO06692);gene-GTA08_BOTSDO11906(GTA08_BOTSDO11906)	gene-GTA08_BOTSDO11023(GTA08_BOTSDO11023)
GO:0090304	BP	nucleic acid metabolic process	8	6	14	1120	1	1	gene-GTA08_BOTSDO00957(GTA08_BOTSDO00957);gene-GTA08_BOTSDO05153(GTA08_BOTSDO05153);gene-GTA08_BOTSDO05356(GTA08_BOTSDO05356);gene-GTA08_BOTSDO07779(GTA08_BOTSDO07779);gene-GTA08_BOTSDO08363(GTA08_BOTSDO08363);gene-GTA08_BOTSDO09070(GTA08_BOTSDO09070);gene-GTA08_BOTSDO09572(GTA08_BOTSDO09572);gene-GTA08_BOTSDO13895(GTA08_BOTSDO13895)	gene-GTA08_BOTSDO03722(GTA08_BOTSDO03722);gene-GTA08_BOTSDO04125(GTA08_BOTSDO04125);gene-GTA08_BOTSDO05317(GTA08_BOTSDO05317);gene-GTA08_BOTSDO05364(GTA08_BOTSDO05364);gene-GTA08_BOTSDO10643(GTA08_BOTSDO10643);gene-GTA08_BOTSDO11445(GTA08_BOTSDO11445)
GO:1901360	BP	organic cyclic compound metabolic process	10	20	30	1422	1	1	gene-GTA08_BOTSDO00957(GTA08_BOTSDO00957);gene-GTA08_BOTSDO05153(GTA08_BOTSDO05153);gene-GTA08_BOTSDO05356(GTA08_BOTSDO05356);gene-GTA08_BOTSDO06780(GTA08_BOTSDO06780);gene-GTA08_BOTSDO07779(GTA08_BOTSDO07779);gene-GTA08_BOTSDO08363(GTA08_BOTSDO08363);gene-GTA08_BOTSDO09070(GTA08_BOTSDO09070);gene-GTA08_BOTSDO09572(GTA08_BOTSDO09572);gene-GTA08_BOTSDO11135(GTA08_BOTSDO11135);gene-GTA08_BOTSDO1389…	gene-GTA08_BOTSDO00110(GTA08_BOTSDO00110);gene-GTA08_BOTSDO00195(GTA08_BOTSDO00195);gene-GTA08_BOTSDO00716(GTA08_BOTSDO00716);gene-GTA08_BOTSDO02221(GTA08_BOTSDO02221);gene-GTA08_BOTSDO03722(GTA08_BOTSDO03722);gene-GTA08_BOTSDO04125(GTA08_BOTSDO04125);gene-GTA08_BOTSDO04126(GTA08_BOTSDO04126);gene-GTA08_BOTSDO05317(GTA08_BOTSDO05317);gene-GTA08_BOTSDO05364(GTA08_BOTSDO05364);gene-GTA08_BOTSDO0547…
GO:1901576	BP	organic substance biosynthetic process	12	15	27	1368	1	1	gene-GTA08_BOTSDO00957(GTA08_BOTSDO00957);gene-GTA08_BOTSDO01186(GTA08_BOTSDO01186);gene-GTA08_BOTSDO07298(GTA08_BOTSDO07298);gene-GTA08_BOTSDO07725(GTA08_BOTSDO07725);gene-GTA08_BOTSDO08363(GTA08_BOTSDO08363);gene-GTA08_BOTSDO09070(GTA08_BOTSDO09070);gene-GTA08_BOTSDO09572(GTA08_BOTSDO09572);gene-GTA08_BOTSDO09619(GTA08_BOTSDO09619);gene-GTA08_BOTSDO11135(GTA08_BOTSDO11135);gene-GTA08_BOTSDO1149…	gene-GTA08_BOTSDO00110(GTA08_BOTSDO00110);gene-GTA08_BOTSDO00716(GTA08_BOTSDO00716);gene-GTA08_BOTSDO01769(GTA08_BOTSDO01769);gene-GTA08_BOTSDO02221(GTA08_BOTSDO02221);gene-GTA08_BOTSDO02849(GTA08_BOTSDO02849);gene-GTA08_BOTSDO04126(GTA08_BOTSDO04126);gene-GTA08_BOTSDO05317(GTA08_BOTSDO05317);gene-GTA08_BOTSDO08260(GTA08_BOTSDO08260);gene-GTA08_BOTSDO08782(GTA08_BOTSDO08782);gene-GTA08_BOTSDO0951…
GO:0016020	CC	membrane	95	112	207	2906	2.01472e-21	1.02751e-19	gene-GTA08_BOTSDO00027(GTA08_BOTSDO00027);gene-GTA08_BOTSDO00131(GTA08_BOTSDO00131);gene-GTA08_BOTSDO00218(GTA08_BOTSDO00218);gene-GTA08_BOTSDO00262(GTA08_BOTSDO00262);gene-GTA08_BOTSDO00377(GTA08_BOTSDO00377);gene-GTA08_BOTSDO00389(GTA08_BOTSDO00389);gene-GTA08_BOTSDO01201(GTA08_BOTSDO01201);gene-GTA08_BOTSDO01237(GTA08_BOTSDO01237);gene-GTA08_BOTSDO01561(GTA08_BOTSDO01561);gene-GTA08_BOTSDO0163…	gene-GTA08_BOTSDO00110(GTA08_BOTSDO00110);gene-GTA08_BOTSDO00371(GTA08_BOTSDO00371);gene-GTA08_BOTSDO00393(GTA08_BOTSDO00393);gene-GTA08_BOTSDO00567(GTA08_BOTSDO00567);gene-GTA08_BOTSDO00662(GTA08_BOTSDO00662);gene-GTA08_BOTSDO00902(GTA08_BOTSDO00902);gene-GTA08_BOTSDO01227(GTA08_BOTSDO01227);gene-GTA08_BOTSDO01248(GTA08_BOTSDO01248);gene-GTA08_BOTSDO01335(GTA08_BOTSDO01335);gene-GTA08_BOTSDO0134…
GO:0016021	CC	integral component of membrane	76	98	174	2325	1.32694e-16	2.6408e-15	gene-GTA08_BOTSDO00131(GTA08_BOTSDO00131);gene-GTA08_BOTSDO00218(GTA08_BOTSDO00218);gene-GTA08_BOTSDO00262(GTA08_BOTSDO00262);gene-GTA08_BOTSDO00377(GTA08_BOTSDO00377);gene-GTA08_BOTSDO00389(GTA08_BOTSDO00389);gene-GTA08_BOTSDO01201(GTA08_BOTSDO01201);gene-GTA08_BOTSDO01237(GTA08_BOTSDO01237);gene-GTA08_BOTSDO01561(GTA08_BOTSDO01561);gene-GTA08_BOTSDO01634(GTA08_BOTSDO01634);gene-GTA08_BOTSDO0175…	gene-GTA08_BOTSDO00110(GTA08_BOTSDO00110);gene-GTA08_BOTSDO00393(GTA08_BOTSDO00393);gene-GTA08_BOTSDO00567(GTA08_BOTSDO00567);gene-GTA08_BOTSDO00662(GTA08_BOTSDO00662);gene-GTA08_BOTSDO00902(GTA08_BOTSDO00902);gene-GTA08_BOTSDO01227(GTA08_BOTSDO01227);gene-GTA08_BOTSDO01248(GTA08_BOTSDO01248);gene-GTA08_BOTSDO01335(GTA08_BOTSDO01335);gene-GTA08_BOTSDO01346(GTA08_BOTSDO01346);gene-GTA08_BOTSDO0143…
GO:0031224	CC	intrinsic component of membrane	76	98	174	2328	1.55341e-16	2.6408e-15	gene-GTA08_BOTSDO00131(GTA08_BOTSDO00131);gene-GTA08_BOTSDO00218(GTA08_BOTSDO00218);gene-GTA08_BOTSDO00262(GTA08_BOTSDO00262);gene-GTA08_BOTSDO00377(GTA08_BOTSDO00377);gene-GTA08_BOTSDO00389(GTA08_BOTSDO00389);gene-GTA08_BOTSDO01201(GTA08_BOTSDO01201);gene-GTA08_BOTSDO01237(GTA08_BOTSDO01237);gene-GTA08_BOTSDO01561(GTA08_BOTSDO01561);gene-GTA08_BOTSDO01634(GTA08_BOTSDO01634);gene-GTA08_BOTSDO0175…	gene-GTA08_BOTSDO00110(GTA08_BOTSDO00110);gene-GTA08_BOTSDO00393(GTA08_BOTSDO00393);gene-GTA08_BOTSDO00567(GTA08_BOTSDO00567);gene-GTA08_BOTSDO00662(GTA08_BOTSDO00662);gene-GTA08_BOTSDO00902(GTA08_BOTSDO00902);gene-GTA08_BOTSDO01227(GTA08_BOTSDO01227);gene-GTA08_BOTSDO01248(GTA08_BOTSDO01248);gene-GTA08_BOTSDO01335(GTA08_BOTSDO01335);gene-GTA08_BOTSDO01346(GTA08_BOTSDO01346);gene-GTA08_BOTSDO0143…
GO:0005576	CC	extracellular region	2	9	11	82	0.00174725	0.0222775	gene-GTA08_BOTSDO00408(GTA08_BOTSDO00408);gene-GTA08_BOTSDO10907(GTA08_BOTSDO10907)	gene-GTA08_BOTSDO01758(GTA08_BOTSDO01758);gene-GTA08_BOTSDO02133(GTA08_BOTSDO02133);gene-GTA08_BOTSDO03362(GTA08_BOTSDO03362);gene-GTA08_BOTSDO03596(GTA08_BOTSDO03596);gene-GTA08_BOTSDO05417(GTA08_BOTSDO05417);gene-GTA08_BOTSDO08012(GTA08_BOTSDO08012);gene-GTA08_BOTSDO08034(GTA08_BOTSDO08034);gene-GTA08_BOTSDO08820(GTA08_BOTSDO08820);gene-GTA08_BOTSDO09127(GTA08_BOTSDO09127)
GO:0110165	CC	cellular anatomical entity	113	128	241	4857	0.00276767	0.0282303	gene-GTA08_BOTSDO00027(GTA08_BOTSDO00027);gene-GTA08_BOTSDO00131(GTA08_BOTSDO00131);gene-GTA08_BOTSDO00218(GTA08_BOTSDO00218);gene-GTA08_BOTSDO00262(GTA08_BOTSDO00262);gene-GTA08_BOTSDO00377(GTA08_BOTSDO00377);gene-GTA08_BOTSDO00389(GTA08_BOTSDO00389);gene-GTA08_BOTSDO00408(GTA08_BOTSDO00408);gene-GTA08_BOTSDO00957(GTA08_BOTSDO00957);gene-GTA08_BOTSDO01201(GTA08_BOTSDO01201);gene-GTA08_BOTSDO0123…	gene-GTA08_BOTSDO00110(GTA08_BOTSDO00110);gene-GTA08_BOTSDO00371(GTA08_BOTSDO00371);gene-GTA08_BOTSDO00393(GTA08_BOTSDO00393);gene-GTA08_BOTSDO00567(GTA08_BOTSDO00567);gene-GTA08_BOTSDO00662(GTA08_BOTSDO00662);gene-GTA08_BOTSDO00716(GTA08_BOTSDO00716);gene-GTA08_BOTSDO00902(GTA08_BOTSDO00902);gene-GTA08_BOTSDO01227(GTA08_BOTSDO01227);gene-GTA08_BOTSDO01248(GTA08_BOTSDO01248);gene-GTA08_BOTSDO0133…
GO:0005618	CC	cell wall	1	1	2	17	0.196438	1	gene-GTA08_BOTSDO11906(GTA08_BOTSDO11906)	gene-GTA08_BOTSDO07550(GTA08_BOTSDO07550)
GO:0030312	CC	external encapsulating structure	1	1	2	17	0.196438	1	gene-GTA08_BOTSDO11906(GTA08_BOTSDO11906)	gene-GTA08_BOTSDO07550(GTA08_BOTSDO07550)
GO:1990251	CC	nuclear exosome focus	0	1	1	5	0.219008	1	-	gene-GTA08_BOTSDO11445(GTA08_BOTSDO11445)
GO:0016604	CC	nuclear body	0	1	1	6	0.256703	1	-	gene-GTA08_BOTSDO11445(GTA08_BOTSDO11445)
GO:0005643	CC	nuclear pore	0	4	4	54	0.262059	1	-	gene-GTA08_BOTSDO05301(GTA08_BOTSDO05301);gene-GTA08_BOTSDO05670(GTA08_BOTSDO05670);gene-GTA08_BOTSDO08034(GTA08_BOTSDO08034);gene-GTA08_BOTSDO08265(GTA08_BOTSDO08265)
GO:0005635	CC	nuclear envelope	2	4	6	94	0.299704	1	gene-GTA08_BOTSDO07275(GTA08_BOTSDO07275);gene-GTA08_BOTSDO11467(GTA08_BOTSDO11467)	gene-GTA08_BOTSDO05301(GTA08_BOTSDO05301);gene-GTA08_BOTSDO05670(GTA08_BOTSDO05670);gene-GTA08_BOTSDO08034(GTA08_BOTSDO08034);gene-GTA08_BOTSDO08265(GTA08_BOTSDO08265)
GO:0005887	CC	integral component of plasma membrane	0	1	1	11	0.419667	1	-	gene-GTA08_BOTSDO13953(GTA08_BOTSDO13953)
GO:0005847	CC	mRNA cleavage and polyadenylation specificity factor complex	0	1	1	12	0.447711	1	-	gene-GTA08_BOTSDO11445(GTA08_BOTSDO11445)
GO:0031226	CC	intrinsic component of plasma membrane	0	1	1	12	0.447711	1	-	gene-GTA08_BOTSDO13953(GTA08_BOTSDO13953)
GO:0005849	CC	mRNA cleavage factor complex	0	1	1	16	0.547017	1	-	gene-GTA08_BOTSDO11445(GTA08_BOTSDO11445)
GO:0070469	CC	respirasome	1	0	1	16	0.547017	1	gene-GTA08_BOTSDO10674(GTA08_BOTSDO10674)	-
GO:0030176	CC	integral component of endoplasmic reticulum membrane	0	1	1	25	0.710178	1	-	gene-GTA08_BOTSDO11023(GTA08_BOTSDO11023)
GO:0031227	CC	intrinsic component of endoplasmic reticulum membrane	0	1	1	25	0.710178	1	-	gene-GTA08_BOTSDO11023(GTA08_BOTSDO11023)
GO:0005758	CC	mitochondrial intermembrane space	1	0	1	27	0.737588	1	gene-GTA08_BOTSDO06888(GTA08_BOTSDO06888)	-
GO:0031970	CC	organelle envelope lumen	1	0	1	29	0.762416	1	gene-GTA08_BOTSDO06888(GTA08_BOTSDO06888)	-
GO:0005777	CC	peroxisome	1	0	1	33	0.805271	1	gene-GTA08_BOTSDO07725(GTA08_BOTSDO07725)	-
GO:0042579	CC	microbody	1	0	1	33	0.805271	1	gene-GTA08_BOTSDO07725(GTA08_BOTSDO07725)	-
GO:0005886	CC	plasma membrane	1	1	2	87	0.92828	1	gene-GTA08_BOTSDO02353(GTA08_BOTSDO02353)	gene-GTA08_BOTSDO13953(GTA08_BOTSDO13953)
GO:0071944	CC	cell periphery	2	2	4	160	0.955013	1	gene-GTA08_BOTSDO02353(GTA08_BOTSDO02353);gene-GTA08_BOTSDO11906(GTA08_BOTSDO11906)	gene-GTA08_BOTSDO07550(GTA08_BOTSDO07550);gene-GTA08_BOTSDO13953(GTA08_BOTSDO13953)
GO:0031967	CC	organelle envelope	3	4	7	247	0.959302	1	gene-GTA08_BOTSDO06888(GTA08_BOTSDO06888);gene-GTA08_BOTSDO07275(GTA08_BOTSDO07275);gene-GTA08_BOTSDO11467(GTA08_BOTSDO11467)	gene-GTA08_BOTSDO05301(GTA08_BOTSDO05301);gene-GTA08_BOTSDO05670(GTA08_BOTSDO05670);gene-GTA08_BOTSDO08034(GTA08_BOTSDO08034);gene-GTA08_BOTSDO08265(GTA08_BOTSDO08265)
GO:0031975	CC	envelope	3	4	7	247	0.959302	1	gene-GTA08_BOTSDO06888(GTA08_BOTSDO06888);gene-GTA08_BOTSDO07275(GTA08_BOTSDO07275);gene-GTA08_BOTSDO11467(GTA08_BOTSDO11467)	gene-GTA08_BOTSDO05301(GTA08_BOTSDO05301);gene-GTA08_BOTSDO05670(GTA08_BOTSDO05670);gene-GTA08_BOTSDO08034(GTA08_BOTSDO08034);gene-GTA08_BOTSDO08265(GTA08_BOTSDO08265)
GO:0031301	CC	integral component of organelle membrane	0	1	1	81	0.982331	1	-	gene-GTA08_BOTSDO11023(GTA08_BOTSDO11023)
GO:0031300	CC	intrinsic component of organelle membrane	0	1	1	84	0.984804	1	-	gene-GTA08_BOTSDO11023(GTA08_BOTSDO11023)
GO:0005789	CC	endoplasmic reticulum membrane	0	1	1	100	0.993211	1	-	gene-GTA08_BOTSDO11023(GTA08_BOTSDO11023)
GO:0005783	CC	endoplasmic reticulum	2	0	2	149	0.995025	1	gene-GTA08_BOTSDO01432(GTA08_BOTSDO01432);gene-GTA08_BOTSDO11570(GTA08_BOTSDO11570)	-
GO:0042175	CC	nuclear outer membrane-endoplasmic reticulum membrane network	0	1	1	108	0.995467	1	-	gene-GTA08_BOTSDO11023(GTA08_BOTSDO11023)
GO:0005794	CC	Golgi apparatus	1	0	1	114	0.996653	1	gene-GTA08_BOTSDO11570(GTA08_BOTSDO11570)	-
GO:0012505	CC	endomembrane system	4	5	9	406	0.998357	1	gene-GTA08_BOTSDO01432(GTA08_BOTSDO01432);gene-GTA08_BOTSDO07275(GTA08_BOTSDO07275);gene-GTA08_BOTSDO11467(GTA08_BOTSDO11467);gene-GTA08_BOTSDO11570(GTA08_BOTSDO11570)	gene-GTA08_BOTSDO05301(GTA08_BOTSDO05301);gene-GTA08_BOTSDO05670(GTA08_BOTSDO05670);gene-GTA08_BOTSDO08034(GTA08_BOTSDO08034);gene-GTA08_BOTSDO08265(GTA08_BOTSDO08265);gene-GTA08_BOTSDO11023(GTA08_BOTSDO11023)
GO:0005654	CC	nucleoplasm	0	1	1	131	0.998586	1	-	gene-GTA08_BOTSDO11445(GTA08_BOTSDO11445)
GO:0005740	CC	mitochondrial envelope	1	0	1	154	0.999561	1	gene-GTA08_BOTSDO06888(GTA08_BOTSDO06888)	-
GO:0005739	CC	mitochondrion	2	1	3	386	0.999999	1	gene-GTA08_BOTSDO06780(GTA08_BOTSDO06780);gene-GTA08_BOTSDO06888(GTA08_BOTSDO06888)	gene-GTA08_BOTSDO07597(GTA08_BOTSDO07597)
GO:0031981	CC	nuclear lumen	0	1	1	342	1	1	-	gene-GTA08_BOTSDO11445(GTA08_BOTSDO11445)
GO:0031090	CC	organelle membrane	0	1	1	363	1	1	-	gene-GTA08_BOTSDO11023(GTA08_BOTSDO11023)
GO:0031974	CC	membrane-enclosed lumen	1	1	2	452	1	1	gene-GTA08_BOTSDO06888(GTA08_BOTSDO06888)	gene-GTA08_BOTSDO11445(GTA08_BOTSDO11445)
GO:0043233	CC	organelle lumen	1	1	2	452	1	1	gene-GTA08_BOTSDO06888(GTA08_BOTSDO06888)	gene-GTA08_BOTSDO11445(GTA08_BOTSDO11445)
GO:0070013	CC	intracellular organelle lumen	1	1	2	452	1	1	gene-GTA08_BOTSDO06888(GTA08_BOTSDO06888)	gene-GTA08_BOTSDO11445(GTA08_BOTSDO11445)
GO:0005829	CC	cytosol	5	2	7	699	1	1	gene-GTA08_BOTSDO07275(GTA08_BOTSDO07275);gene-GTA08_BOTSDO07298(GTA08_BOTSDO07298);gene-GTA08_BOTSDO07725(GTA08_BOTSDO07725);gene-GTA08_BOTSDO11467(GTA08_BOTSDO11467);gene-GTA08_BOTSDO11490(GTA08_BOTSDO11490)	gene-GTA08_BOTSDO04804(GTA08_BOTSDO04804);gene-GTA08_BOTSDO11445(GTA08_BOTSDO11445)
GO:0005575	CC	cellular_component	114	128	242	5019	1	1	gene-GTA08_BOTSDO00027(GTA08_BOTSDO00027);gene-GTA08_BOTSDO00131(GTA08_BOTSDO00131);gene-GTA08_BOTSDO00218(GTA08_BOTSDO00218);gene-GTA08_BOTSDO00262(GTA08_BOTSDO00262);gene-GTA08_BOTSDO00377(GTA08_BOTSDO00377);gene-GTA08_BOTSDO00389(GTA08_BOTSDO00389);gene-GTA08_BOTSDO00408(GTA08_BOTSDO00408);gene-GTA08_BOTSDO00957(GTA08_BOTSDO00957);gene-GTA08_BOTSDO01201(GTA08_BOTSDO01201);gene-GTA08_BOTSDO0123…	gene-GTA08_BOTSDO00110(GTA08_BOTSDO00110);gene-GTA08_BOTSDO00371(GTA08_BOTSDO00371);gene-GTA08_BOTSDO00393(GTA08_BOTSDO00393);gene-GTA08_BOTSDO00567(GTA08_BOTSDO00567);gene-GTA08_BOTSDO00662(GTA08_BOTSDO00662);gene-GTA08_BOTSDO00716(GTA08_BOTSDO00716);gene-GTA08_BOTSDO00902(GTA08_BOTSDO00902);gene-GTA08_BOTSDO01227(GTA08_BOTSDO01227);gene-GTA08_BOTSDO01248(GTA08_BOTSDO01248);gene-GTA08_BOTSDO0133…
GO:0005622	CC	intracellular	17	10	27	2583	1	1	gene-GTA08_BOTSDO00957(GTA08_BOTSDO00957);gene-GTA08_BOTSDO01432(GTA08_BOTSDO01432);gene-GTA08_BOTSDO06692(GTA08_BOTSDO06692);gene-GTA08_BOTSDO06780(GTA08_BOTSDO06780);gene-GTA08_BOTSDO06888(GTA08_BOTSDO06888);gene-GTA08_BOTSDO07018(GTA08_BOTSDO07018);gene-GTA08_BOTSDO07275(GTA08_BOTSDO07275);gene-GTA08_BOTSDO07298(GTA08_BOTSDO07298);gene-GTA08_BOTSDO07725(GTA08_BOTSDO07725);gene-GTA08_BOTSDO0777…	gene-GTA08_BOTSDO00716(GTA08_BOTSDO00716);gene-GTA08_BOTSDO02221(GTA08_BOTSDO02221);gene-GTA08_BOTSDO04804(GTA08_BOTSDO04804);gene-GTA08_BOTSDO05301(GTA08_BOTSDO05301);gene-GTA08_BOTSDO05317(GTA08_BOTSDO05317);gene-GTA08_BOTSDO05670(GTA08_BOTSDO05670);gene-GTA08_BOTSDO07597(GTA08_BOTSDO07597);gene-GTA08_BOTSDO08034(GTA08_BOTSDO08034);gene-GTA08_BOTSDO08265(GTA08_BOTSDO08265);gene-GTA08_BOTSDO1144…
GO:0005634	CC	nucleus	6	6	12	1289	1	1	gene-GTA08_BOTSDO00957(GTA08_BOTSDO00957);gene-GTA08_BOTSDO07275(GTA08_BOTSDO07275);gene-GTA08_BOTSDO07725(GTA08_BOTSDO07725);gene-GTA08_BOTSDO09572(GTA08_BOTSDO09572);gene-GTA08_BOTSDO11467(GTA08_BOTSDO11467);gene-GTA08_BOTSDO13895(GTA08_BOTSDO13895)	gene-GTA08_BOTSDO05301(GTA08_BOTSDO05301);gene-GTA08_BOTSDO05317(GTA08_BOTSDO05317);gene-GTA08_BOTSDO05670(GTA08_BOTSDO05670);gene-GTA08_BOTSDO08034(GTA08_BOTSDO08034);gene-GTA08_BOTSDO08265(GTA08_BOTSDO08265);gene-GTA08_BOTSDO11445(GTA08_BOTSDO11445)
GO:0005737	CC	cytoplasm	12	5	17	1624	1	1	gene-GTA08_BOTSDO01432(GTA08_BOTSDO01432);gene-GTA08_BOTSDO06692(GTA08_BOTSDO06692);gene-GTA08_BOTSDO06780(GTA08_BOTSDO06780);gene-GTA08_BOTSDO06888(GTA08_BOTSDO06888);gene-GTA08_BOTSDO07018(GTA08_BOTSDO07018);gene-GTA08_BOTSDO07275(GTA08_BOTSDO07275);gene-GTA08_BOTSDO07298(GTA08_BOTSDO07298);gene-GTA08_BOTSDO07725(GTA08_BOTSDO07725);gene-GTA08_BOTSDO11212(GTA08_BOTSDO11212);gene-GTA08_BOTSDO1146…	gene-GTA08_BOTSDO00716(GTA08_BOTSDO00716);gene-GTA08_BOTSDO02221(GTA08_BOTSDO02221);gene-GTA08_BOTSDO04804(GTA08_BOTSDO04804);gene-GTA08_BOTSDO07597(GTA08_BOTSDO07597);gene-GTA08_BOTSDO11445(GTA08_BOTSDO11445)
GO:0032991	CC	protein-containing complex	0	5	5	965	1	1	-	gene-GTA08_BOTSDO05301(GTA08_BOTSDO05301);gene-GTA08_BOTSDO05670(GTA08_BOTSDO05670);gene-GTA08_BOTSDO08034(GTA08_BOTSDO08034);gene-GTA08_BOTSDO08265(GTA08_BOTSDO08265);gene-GTA08_BOTSDO11445(GTA08_BOTSDO11445)
GO:0043226	CC	organelle	11	8	19	2177	1	1	gene-GTA08_BOTSDO00957(GTA08_BOTSDO00957);gene-GTA08_BOTSDO01432(GTA08_BOTSDO01432);gene-GTA08_BOTSDO06780(GTA08_BOTSDO06780);gene-GTA08_BOTSDO06888(GTA08_BOTSDO06888);gene-GTA08_BOTSDO07275(GTA08_BOTSDO07275);gene-GTA08_BOTSDO07725(GTA08_BOTSDO07725);gene-GTA08_BOTSDO07779(GTA08_BOTSDO07779);gene-GTA08_BOTSDO09572(GTA08_BOTSDO09572);gene-GTA08_BOTSDO11467(GTA08_BOTSDO11467);gene-GTA08_BOTSDO1157…	gene-GTA08_BOTSDO05301(GTA08_BOTSDO05301);gene-GTA08_BOTSDO05317(GTA08_BOTSDO05317);gene-GTA08_BOTSDO05670(GTA08_BOTSDO05670);gene-GTA08_BOTSDO07597(GTA08_BOTSDO07597);gene-GTA08_BOTSDO08034(GTA08_BOTSDO08034);gene-GTA08_BOTSDO08265(GTA08_BOTSDO08265);gene-GTA08_BOTSDO11023(GTA08_BOTSDO11023);gene-GTA08_BOTSDO11445(GTA08_BOTSDO11445)
GO:0043227	CC	membrane-bounded organelle	11	8	19	1964	1	1	gene-GTA08_BOTSDO00957(GTA08_BOTSDO00957);gene-GTA08_BOTSDO01432(GTA08_BOTSDO01432);gene-GTA08_BOTSDO06780(GTA08_BOTSDO06780);gene-GTA08_BOTSDO06888(GTA08_BOTSDO06888);gene-GTA08_BOTSDO07275(GTA08_BOTSDO07275);gene-GTA08_BOTSDO07725(GTA08_BOTSDO07725);gene-GTA08_BOTSDO07779(GTA08_BOTSDO07779);gene-GTA08_BOTSDO09572(GTA08_BOTSDO09572);gene-GTA08_BOTSDO11467(GTA08_BOTSDO11467);gene-GTA08_BOTSDO1157…	gene-GTA08_BOTSDO05301(GTA08_BOTSDO05301);gene-GTA08_BOTSDO05317(GTA08_BOTSDO05317);gene-GTA08_BOTSDO05670(GTA08_BOTSDO05670);gene-GTA08_BOTSDO07597(GTA08_BOTSDO07597);gene-GTA08_BOTSDO08034(GTA08_BOTSDO08034);gene-GTA08_BOTSDO08265(GTA08_BOTSDO08265);gene-GTA08_BOTSDO11023(GTA08_BOTSDO11023);gene-GTA08_BOTSDO11445(GTA08_BOTSDO11445)
GO:0043229	CC	intracellular organelle	11	7	18	2121	1	1	gene-GTA08_BOTSDO00957(GTA08_BOTSDO00957);gene-GTA08_BOTSDO01432(GTA08_BOTSDO01432);gene-GTA08_BOTSDO06780(GTA08_BOTSDO06780);gene-GTA08_BOTSDO06888(GTA08_BOTSDO06888);gene-GTA08_BOTSDO07275(GTA08_BOTSDO07275);gene-GTA08_BOTSDO07725(GTA08_BOTSDO07725);gene-GTA08_BOTSDO07779(GTA08_BOTSDO07779);gene-GTA08_BOTSDO09572(GTA08_BOTSDO09572);gene-GTA08_BOTSDO11467(GTA08_BOTSDO11467);gene-GTA08_BOTSDO1157…	gene-GTA08_BOTSDO05301(GTA08_BOTSDO05301);gene-GTA08_BOTSDO05317(GTA08_BOTSDO05317);gene-GTA08_BOTSDO05670(GTA08_BOTSDO05670);gene-GTA08_BOTSDO07597(GTA08_BOTSDO07597);gene-GTA08_BOTSDO08034(GTA08_BOTSDO08034);gene-GTA08_BOTSDO08265(GTA08_BOTSDO08265);gene-GTA08_BOTSDO11445(GTA08_BOTSDO11445)
GO:0043231	CC	intracellular membrane-bounded organelle	11	7	18	1887	1	1	gene-GTA08_BOTSDO00957(GTA08_BOTSDO00957);gene-GTA08_BOTSDO01432(GTA08_BOTSDO01432);gene-GTA08_BOTSDO06780(GTA08_BOTSDO06780);gene-GTA08_BOTSDO06888(GTA08_BOTSDO06888);gene-GTA08_BOTSDO07275(GTA08_BOTSDO07275);gene-GTA08_BOTSDO07725(GTA08_BOTSDO07725);gene-GTA08_BOTSDO07779(GTA08_BOTSDO07779);gene-GTA08_BOTSDO09572(GTA08_BOTSDO09572);gene-GTA08_BOTSDO11467(GTA08_BOTSDO11467);gene-GTA08_BOTSDO1157…	gene-GTA08_BOTSDO05301(GTA08_BOTSDO05301);gene-GTA08_BOTSDO05317(GTA08_BOTSDO05317);gene-GTA08_BOTSDO05670(GTA08_BOTSDO05670);gene-GTA08_BOTSDO07597(GTA08_BOTSDO07597);gene-GTA08_BOTSDO08034(GTA08_BOTSDO08034);gene-GTA08_BOTSDO08265(GTA08_BOTSDO08265);gene-GTA08_BOTSDO11445(GTA08_BOTSDO11445)
GO:0003824	MF	catalytic activity	132	260	392	4407	5.43155e-25	1.79784e-22	gene-GTA08_BOTSDO00024(GTA08_BOTSDO00024);gene-GTA08_BOTSDO00147(GTA08_BOTSDO00147);gene-GTA08_BOTSDO00293(GTA08_BOTSDO00293);gene-GTA08_BOTSDO00309(GTA08_BOTSDO00309);gene-GTA08_BOTSDO00377(GTA08_BOTSDO00377);gene-GTA08_BOTSDO00398(GTA08_BOTSDO00398);gene-GTA08_BOTSDO00408(GTA08_BOTSDO00408);gene-GTA08_BOTSDO00409(GTA08_BOTSDO00409);gene-GTA08_BOTSDO00534(GTA08_BOTSDO00534);gene-GTA08_BOTSDO0118…	gene-GTA08_BOTSDO00156(GTA08_BOTSDO00156);gene-GTA08_BOTSDO00161(GTA08_BOTSDO00161);gene-GTA08_BOTSDO00195(GTA08_BOTSDO00195);gene-GTA08_BOTSDO00332(GTA08_BOTSDO00332);gene-GTA08_BOTSDO00341(GTA08_BOTSDO00341);gene-GTA08_BOTSDO00350(GTA08_BOTSDO00350);gene-GTA08_BOTSDO00371(GTA08_BOTSDO00371);gene-GTA08_BOTSDO00383(GTA08_BOTSDO00383);gene-GTA08_BOTSDO00426(GTA08_BOTSDO00426);gene-GTA08_BOTSDO0047…
GO:0016491	MF	oxidoreductase activity	51	122	173	1397	1.2953e-17	2.14373e-15	gene-GTA08_BOTSDO00398(GTA08_BOTSDO00398);gene-GTA08_BOTSDO01196(GTA08_BOTSDO01196);gene-GTA08_BOTSDO01432(GTA08_BOTSDO01432);gene-GTA08_BOTSDO01631(GTA08_BOTSDO01631);gene-GTA08_BOTSDO01634(GTA08_BOTSDO01634);gene-GTA08_BOTSDO01755(GTA08_BOTSDO01755);gene-GTA08_BOTSDO02023(GTA08_BOTSDO02023);gene-GTA08_BOTSDO02774(GTA08_BOTSDO02774);gene-GTA08_BOTSDO03164(GTA08_BOTSDO03164);gene-GTA08_BOTSDO0340…	gene-GTA08_BOTSDO00195(GTA08_BOTSDO00195);gene-GTA08_BOTSDO00341(GTA08_BOTSDO00341);gene-GTA08_BOTSDO00371(GTA08_BOTSDO00371);gene-GTA08_BOTSDO00477(GTA08_BOTSDO00477);gene-GTA08_BOTSDO00535(GTA08_BOTSDO00535);gene-GTA08_BOTSDO00551(GTA08_BOTSDO00551);gene-GTA08_BOTSDO00783(GTA08_BOTSDO00783);gene-GTA08_BOTSDO01094(GTA08_BOTSDO01094);gene-GTA08_BOTSDO01227(GTA08_BOTSDO01227);gene-GTA08_BOTSDO0134…
GO:0048037	MF	cofactor binding	37	67	104	753	5.81322e-13	6.41392e-11	gene-GTA08_BOTSDO00398(GTA08_BOTSDO00398);gene-GTA08_BOTSDO01631(GTA08_BOTSDO01631);gene-GTA08_BOTSDO01634(GTA08_BOTSDO01634);gene-GTA08_BOTSDO01755(GTA08_BOTSDO01755);gene-GTA08_BOTSDO01962(GTA08_BOTSDO01962);gene-GTA08_BOTSDO02023(GTA08_BOTSDO02023);gene-GTA08_BOTSDO02628(GTA08_BOTSDO02628);gene-GTA08_BOTSDO02774(GTA08_BOTSDO02774);gene-GTA08_BOTSDO03402(GTA08_BOTSDO03402);gene-GTA08_BOTSDO0371…	gene-GTA08_BOTSDO00341(GTA08_BOTSDO00341);gene-GTA08_BOTSDO00783(GTA08_BOTSDO00783);gene-GTA08_BOTSDO01094(GTA08_BOTSDO01094);gene-GTA08_BOTSDO01413(GTA08_BOTSDO01413);gene-GTA08_BOTSDO01663(GTA08_BOTSDO01663);gene-GTA08_BOTSDO01665(GTA08_BOTSDO01665);gene-GTA08_BOTSDO01670(GTA08_BOTSDO01670);gene-GTA08_BOTSDO01703(GTA08_BOTSDO01703);gene-GTA08_BOTSDO01717(GTA08_BOTSDO01717);gene-GTA08_BOTSDO0173…
GO:0050662	MF	coenzyme binding	24	43	67	459	1.74314e-09	1.44245e-07	gene-GTA08_BOTSDO00398(GTA08_BOTSDO00398);gene-GTA08_BOTSDO01631(GTA08_BOTSDO01631);gene-GTA08_BOTSDO01962(GTA08_BOTSDO01962);gene-GTA08_BOTSDO02628(GTA08_BOTSDO02628);gene-GTA08_BOTSDO03718(GTA08_BOTSDO03718);gene-GTA08_BOTSDO04104(GTA08_BOTSDO04104);gene-GTA08_BOTSDO04504(GTA08_BOTSDO04504);gene-GTA08_BOTSDO04508(GTA08_BOTSDO04508);gene-GTA08_BOTSDO05273(GTA08_BOTSDO05273);gene-GTA08_BOTSDO0542…	gene-GTA08_BOTSDO00341(GTA08_BOTSDO00341);gene-GTA08_BOTSDO00783(GTA08_BOTSDO00783);gene-GTA08_BOTSDO01094(GTA08_BOTSDO01094);gene-GTA08_BOTSDO01413(GTA08_BOTSDO01413);gene-GTA08_BOTSDO01665(GTA08_BOTSDO01665);gene-GTA08_BOTSDO01703(GTA08_BOTSDO01703);gene-GTA08_BOTSDO01818(GTA08_BOTSDO01818);gene-GTA08_BOTSDO02647(GTA08_BOTSDO02647);gene-GTA08_BOTSDO02849(GTA08_BOTSDO02849);gene-GTA08_BOTSDO0312…
GO:0030246	MF	carbohydrate binding	3	15	18	66	3.0668e-07	2.03022e-05	gene-GTA08_BOTSDO01570(GTA08_BOTSDO01570);gene-GTA08_BOTSDO07781(GTA08_BOTSDO07781);gene-GTA08_BOTSDO10907(GTA08_BOTSDO10907)	gene-GTA08_BOTSDO00383(GTA08_BOTSDO00383);gene-GTA08_BOTSDO01891(GTA08_BOTSDO01891);gene-GTA08_BOTSDO02133(GTA08_BOTSDO02133);gene-GTA08_BOTSDO03722(GTA08_BOTSDO03722);gene-GTA08_BOTSDO03803(GTA08_BOTSDO03803);gene-GTA08_BOTSDO04355(GTA08_BOTSDO04355);gene-GTA08_BOTSDO04749(GTA08_BOTSDO04749);gene-GTA08_BOTSDO05417(GTA08_BOTSDO05417);gene-GTA08_BOTSDO08820(GTA08_BOTSDO08820);gene-GTA08_BOTSDO0976…
GO:0004497	MF	monooxygenase activity	14	28	42	270	4.47035e-07	2.46614e-05	gene-GTA08_BOTSDO01634(GTA08_BOTSDO01634);gene-GTA08_BOTSDO01755(GTA08_BOTSDO01755);gene-GTA08_BOTSDO02023(GTA08_BOTSDO02023);gene-GTA08_BOTSDO02774(GTA08_BOTSDO02774);gene-GTA08_BOTSDO03718(GTA08_BOTSDO03718);gene-GTA08_BOTSDO04508(GTA08_BOTSDO04508);gene-GTA08_BOTSDO05439(GTA08_BOTSDO05439);gene-GTA08_BOTSDO06884(GTA08_BOTSDO06884);gene-GTA08_BOTSDO07625(GTA08_BOTSDO07625);gene-GTA08_BOTSDO0956…	gene-GTA08_BOTSDO00783(GTA08_BOTSDO00783);gene-GTA08_BOTSDO01413(GTA08_BOTSDO01413);gene-GTA08_BOTSDO01663(GTA08_BOTSDO01663);gene-GTA08_BOTSDO01665(GTA08_BOTSDO01665);gene-GTA08_BOTSDO01670(GTA08_BOTSDO01670);gene-GTA08_BOTSDO01731(GTA08_BOTSDO01731);gene-GTA08_BOTSDO01846(GTA08_BOTSDO01846);gene-GTA08_BOTSDO02095(GTA08_BOTSDO02095);gene-GTA08_BOTSDO02647(GTA08_BOTSDO02647);gene-GTA08_BOTSDO0359…
GO:0016705	MF	oxidoreductase activity, acting on paired donors, with incorporation or reduction of molecular oxygen	14	23	37	237	2.05909e-06	9.73655e-05	gene-GTA08_BOTSDO01634(GTA08_BOTSDO01634);gene-GTA08_BOTSDO01755(GTA08_BOTSDO01755);gene-GTA08_BOTSDO02023(GTA08_BOTSDO02023);gene-GTA08_BOTSDO02774(GTA08_BOTSDO02774);gene-GTA08_BOTSDO03402(GTA08_BOTSDO03402);gene-GTA08_BOTSDO05439(GTA08_BOTSDO05439);gene-GTA08_BOTSDO07625(GTA08_BOTSDO07625);gene-GTA08_BOTSDO09565(GTA08_BOTSDO09565);gene-GTA08_BOTSDO09571(GTA08_BOTSDO09571);gene-GTA08_BOTSDO1047…	gene-GTA08_BOTSDO00783(GTA08_BOTSDO00783);gene-GTA08_BOTSDO01413(GTA08_BOTSDO01413);gene-GTA08_BOTSDO01663(GTA08_BOTSDO01663);gene-GTA08_BOTSDO01670(GTA08_BOTSDO01670);gene-GTA08_BOTSDO01731(GTA08_BOTSDO01731);gene-GTA08_BOTSDO01846(GTA08_BOTSDO01846);gene-GTA08_BOTSDO02095(GTA08_BOTSDO02095);gene-GTA08_BOTSDO02767(GTA08_BOTSDO02767);gene-GTA08_BOTSDO03610(GTA08_BOTSDO03610);gene-GTA08_BOTSDO0387…
GO:0020037	MF	heme binding	14	21	35	226	4.74058e-06	0.000174348	gene-GTA08_BOTSDO01634(GTA08_BOTSDO01634);gene-GTA08_BOTSDO01755(GTA08_BOTSDO01755);gene-GTA08_BOTSDO02023(GTA08_BOTSDO02023);gene-GTA08_BOTSDO02774(GTA08_BOTSDO02774);gene-GTA08_BOTSDO03402(GTA08_BOTSDO03402);gene-GTA08_BOTSDO05439(GTA08_BOTSDO05439);gene-GTA08_BOTSDO07625(GTA08_BOTSDO07625);gene-GTA08_BOTSDO09565(GTA08_BOTSDO09565);gene-GTA08_BOTSDO09571(GTA08_BOTSDO09571);gene-GTA08_BOTSDO1047…	gene-GTA08_BOTSDO01663(GTA08_BOTSDO01663);gene-GTA08_BOTSDO01670(GTA08_BOTSDO01670);gene-GTA08_BOTSDO01731(GTA08_BOTSDO01731);gene-GTA08_BOTSDO01846(GTA08_BOTSDO01846);gene-GTA08_BOTSDO02095(GTA08_BOTSDO02095);gene-GTA08_BOTSDO02767(GTA08_BOTSDO02767);gene-GTA08_BOTSDO03610(GTA08_BOTSDO03610);gene-GTA08_BOTSDO03872(GTA08_BOTSDO03872);gene-GTA08_BOTSDO04127(GTA08_BOTSDO04127);gene-GTA08_BOTSDO0482…
GO:0046906	MF	tetrapyrrole binding	14	21	35	226	4.74058e-06	0.000174348	gene-GTA08_BOTSDO01634(GTA08_BOTSDO01634);gene-GTA08_BOTSDO01755(GTA08_BOTSDO01755);gene-GTA08_BOTSDO02023(GTA08_BOTSDO02023);gene-GTA08_BOTSDO02774(GTA08_BOTSDO02774);gene-GTA08_BOTSDO03402(GTA08_BOTSDO03402);gene-GTA08_BOTSDO05439(GTA08_BOTSDO05439);gene-GTA08_BOTSDO07625(GTA08_BOTSDO07625);gene-GTA08_BOTSDO09565(GTA08_BOTSDO09565);gene-GTA08_BOTSDO09571(GTA08_BOTSDO09571);gene-GTA08_BOTSDO1047…	gene-GTA08_BOTSDO01663(GTA08_BOTSDO01663);gene-GTA08_BOTSDO01670(GTA08_BOTSDO01670);gene-GTA08_BOTSDO01731(GTA08_BOTSDO01731);gene-GTA08_BOTSDO01846(GTA08_BOTSDO01846);gene-GTA08_BOTSDO02095(GTA08_BOTSDO02095);gene-GTA08_BOTSDO02767(GTA08_BOTSDO02767);gene-GTA08_BOTSDO03610(GTA08_BOTSDO03610);gene-GTA08_BOTSDO03872(GTA08_BOTSDO03872);gene-GTA08_BOTSDO04127(GTA08_BOTSDO04127);gene-GTA08_BOTSDO0482…
GO:0005506	MF	iron ion binding	16	21	37	250	7.45975e-06	0.000246918	gene-GTA08_BOTSDO01634(GTA08_BOTSDO01634);gene-GTA08_BOTSDO01755(GTA08_BOTSDO01755);gene-GTA08_BOTSDO02023(GTA08_BOTSDO02023);gene-GTA08_BOTSDO02774(GTA08_BOTSDO02774);gene-GTA08_BOTSDO03402(GTA08_BOTSDO03402);gene-GTA08_BOTSDO05439(GTA08_BOTSDO05439);gene-GTA08_BOTSDO07625(GTA08_BOTSDO07625);gene-GTA08_BOTSDO09565(GTA08_BOTSDO09565);gene-GTA08_BOTSDO09571(GTA08_BOTSDO09571);gene-GTA08_BOTSDO1047…	gene-GTA08_BOTSDO01663(GTA08_BOTSDO01663);gene-GTA08_BOTSDO01670(GTA08_BOTSDO01670);gene-GTA08_BOTSDO01731(GTA08_BOTSDO01731);gene-GTA08_BOTSDO01846(GTA08_BOTSDO01846);gene-GTA08_BOTSDO02095(GTA08_BOTSDO02095);gene-GTA08_BOTSDO02525(GTA08_BOTSDO02525);gene-GTA08_BOTSDO02767(GTA08_BOTSDO02767);gene-GTA08_BOTSDO03610(GTA08_BOTSDO03610);gene-GTA08_BOTSDO03872(GTA08_BOTSDO03872);gene-GTA08_BOTSDO0412…
GO:0050660	MF	flavin adenine dinucleotide binding	8	25	33	223	2.36661e-05	0.000712136	gene-GTA08_BOTSDO01631(GTA08_BOTSDO01631);gene-GTA08_BOTSDO03718(GTA08_BOTSDO03718);gene-GTA08_BOTSDO04104(GTA08_BOTSDO04104);gene-GTA08_BOTSDO04504(GTA08_BOTSDO04504);gene-GTA08_BOTSDO05421(GTA08_BOTSDO05421);gene-GTA08_BOTSDO06884(GTA08_BOTSDO06884);gene-GTA08_BOTSDO08895(GTA08_BOTSDO08895);gene-GTA08_BOTSDO13637(GTA08_BOTSDO13637)	gene-GTA08_BOTSDO00341(GTA08_BOTSDO00341);gene-GTA08_BOTSDO00783(GTA08_BOTSDO00783);gene-GTA08_BOTSDO01413(GTA08_BOTSDO01413);gene-GTA08_BOTSDO01665(GTA08_BOTSDO01665);gene-GTA08_BOTSDO02647(GTA08_BOTSDO02647);gene-GTA08_BOTSDO03123(GTA08_BOTSDO03123);gene-GTA08_BOTSDO03978(GTA08_BOTSDO03978);gene-GTA08_BOTSDO04639(GTA08_BOTSDO04639);gene-GTA08_BOTSDO05072(GTA08_BOTSDO05072);gene-GTA08_BOTSDO0531…
GO:0016798	MF	hydrolase activity, acting on glycosyl bonds	9	29	38	288	7.86131e-05	0.00216841	gene-GTA08_BOTSDO01290(GTA08_BOTSDO01290);gene-GTA08_BOTSDO01570(GTA08_BOTSDO01570);gene-GTA08_BOTSDO05188(GTA08_BOTSDO05188);gene-GTA08_BOTSDO06307(GTA08_BOTSDO06307);gene-GTA08_BOTSDO10192(GTA08_BOTSDO10192);gene-GTA08_BOTSDO10386(GTA08_BOTSDO10386);gene-GTA08_BOTSDO10907(GTA08_BOTSDO10907);gene-GTA08_BOTSDO10962(GTA08_BOTSDO10962);gene-GTA08_BOTSDO11906(GTA08_BOTSDO11906)	gene-GTA08_BOTSDO00383(GTA08_BOTSDO00383);gene-GTA08_BOTSDO01356(GTA08_BOTSDO01356);gene-GTA08_BOTSDO01564(GTA08_BOTSDO01564);gene-GTA08_BOTSDO01914(GTA08_BOTSDO01914);gene-GTA08_BOTSDO02095(GTA08_BOTSDO02095);gene-GTA08_BOTSDO02133(GTA08_BOTSDO02133);gene-GTA08_BOTSDO02303(GTA08_BOTSDO02303);gene-GTA08_BOTSDO03462(GTA08_BOTSDO03462);gene-GTA08_BOTSDO03710(GTA08_BOTSDO03710);gene-GTA08_BOTSDO0380…
GO:0004553	MF	hydrolase activity, hydrolyzing O-glycosyl compounds	8	25	33	249	0.000215242	0.0054804	gene-GTA08_BOTSDO01570(GTA08_BOTSDO01570);gene-GTA08_BOTSDO05188(GTA08_BOTSDO05188);gene-GTA08_BOTSDO06307(GTA08_BOTSDO06307);gene-GTA08_BOTSDO10192(GTA08_BOTSDO10192);gene-GTA08_BOTSDO10386(GTA08_BOTSDO10386);gene-GTA08_BOTSDO10907(GTA08_BOTSDO10907);gene-GTA08_BOTSDO10962(GTA08_BOTSDO10962);gene-GTA08_BOTSDO11906(GTA08_BOTSDO11906)	gene-GTA08_BOTSDO00383(GTA08_BOTSDO00383);gene-GTA08_BOTSDO01356(GTA08_BOTSDO01356);gene-GTA08_BOTSDO02095(GTA08_BOTSDO02095);gene-GTA08_BOTSDO02133(GTA08_BOTSDO02133);gene-GTA08_BOTSDO02303(GTA08_BOTSDO02303);gene-GTA08_BOTSDO03462(GTA08_BOTSDO03462);gene-GTA08_BOTSDO03710(GTA08_BOTSDO03710);gene-GTA08_BOTSDO03804(GTA08_BOTSDO03804);gene-GTA08_BOTSDO04181(GTA08_BOTSDO04181);gene-GTA08_BOTSDO0541…
GO:0016787	MF	hydrolase activity	42	90	132	1460	0.000290154	0.00686008	gene-GTA08_BOTSDO00147(GTA08_BOTSDO00147);gene-GTA08_BOTSDO00309(GTA08_BOTSDO00309);gene-GTA08_BOTSDO00377(GTA08_BOTSDO00377);gene-GTA08_BOTSDO00534(GTA08_BOTSDO00534);gene-GTA08_BOTSDO01243(GTA08_BOTSDO01243);gene-GTA08_BOTSDO01290(GTA08_BOTSDO01290);gene-GTA08_BOTSDO01570(GTA08_BOTSDO01570);gene-GTA08_BOTSDO02702(GTA08_BOTSDO02702);gene-GTA08_BOTSDO03252(GTA08_BOTSDO03252);gene-GTA08_BOTSDO0351…	gene-GTA08_BOTSDO00161(GTA08_BOTSDO00161);gene-GTA08_BOTSDO00332(GTA08_BOTSDO00332);gene-GTA08_BOTSDO00350(GTA08_BOTSDO00350);gene-GTA08_BOTSDO00383(GTA08_BOTSDO00383);gene-GTA08_BOTSDO00426(GTA08_BOTSDO00426);gene-GTA08_BOTSDO00662(GTA08_BOTSDO00662);gene-GTA08_BOTSDO00884(GTA08_BOTSDO00884);gene-GTA08_BOTSDO01347(GTA08_BOTSDO01347);gene-GTA08_BOTSDO01356(GTA08_BOTSDO01356);gene-GTA08_BOTSDO0156…
GO:0016620	MF	oxidoreductase activity, acting on the aldehyde or oxo group of donors, NAD or NADP as acceptor	0	9	9	35	0.000483084	0.01066	-	gene-GTA08_BOTSDO01671(GTA08_BOTSDO01671);gene-GTA08_BOTSDO01958(GTA08_BOTSDO01958);gene-GTA08_BOTSDO07813(GTA08_BOTSDO07813);gene-GTA08_BOTSDO08028(GTA08_BOTSDO08028);gene-GTA08_BOTSDO09511(GTA08_BOTSDO09511);gene-GTA08_BOTSDO11740(GTA08_BOTSDO11740);gene-GTA08_BOTSDO12745(GTA08_BOTSDO12745);gene-GTA08_BOTSDO12850(GTA08_BOTSDO12850);gene-GTA08_BOTSDO13246(GTA08_BOTSDO13246)
GO:0004190	MF	aspartic-type endopeptidase activity	2	6	8	30	0.000765205	0.0144732	gene-GTA08_BOTSDO00147(GTA08_BOTSDO00147);gene-GTA08_BOTSDO07349(GTA08_BOTSDO07349)	gene-GTA08_BOTSDO03981(GTA08_BOTSDO03981);gene-GTA08_BOTSDO04544(GTA08_BOTSDO04544);gene-GTA08_BOTSDO07307(GTA08_BOTSDO07307);gene-GTA08_BOTSDO08025(GTA08_BOTSDO08025);gene-GTA08_BOTSDO10425(GTA08_BOTSDO10425);gene-GTA08_BOTSDO11499(GTA08_BOTSDO11499)
GO:0070001	MF	aspartic-type peptidase activity	2	6	8	30	0.000765205	0.0144732	gene-GTA08_BOTSDO00147(GTA08_BOTSDO00147);gene-GTA08_BOTSDO07349(GTA08_BOTSDO07349)	gene-GTA08_BOTSDO03981(GTA08_BOTSDO03981);gene-GTA08_BOTSDO04544(GTA08_BOTSDO04544);gene-GTA08_BOTSDO07307(GTA08_BOTSDO07307);gene-GTA08_BOTSDO08025(GTA08_BOTSDO08025);gene-GTA08_BOTSDO10425(GTA08_BOTSDO10425);gene-GTA08_BOTSDO11499(GTA08_BOTSDO11499)
GO:0071949	MF	FAD binding	4	9	13	69	0.000787061	0.0144732	gene-GTA08_BOTSDO03718(GTA08_BOTSDO03718);gene-GTA08_BOTSDO05421(GTA08_BOTSDO05421);gene-GTA08_BOTSDO06884(GTA08_BOTSDO06884);gene-GTA08_BOTSDO08895(GTA08_BOTSDO08895)	gene-GTA08_BOTSDO01665(GTA08_BOTSDO01665);gene-GTA08_BOTSDO02647(GTA08_BOTSDO02647);gene-GTA08_BOTSDO03978(GTA08_BOTSDO03978);gene-GTA08_BOTSDO04639(GTA08_BOTSDO04639);gene-GTA08_BOTSDO05072(GTA08_BOTSDO05072);gene-GTA08_BOTSDO07192(GTA08_BOTSDO07192);gene-GTA08_BOTSDO08030(GTA08_BOTSDO08030);gene-GTA08_BOTSDO08031(GTA08_BOTSDO08031);gene-GTA08_BOTSDO11689(GTA08_BOTSDO11689)
GO:0004371	MF	glycerone kinase activity	0	3	3	4	0.0012658	0.0220515	-	gene-GTA08_BOTSDO04147(GTA08_BOTSDO04147);gene-GTA08_BOTSDO07933(GTA08_BOTSDO07933);gene-GTA08_BOTSDO09111(GTA08_BOTSDO09111)
GO:0051287	MF	NAD binding	6	6	12	65	0.00149497	0.0247418	gene-GTA08_BOTSDO01962(GTA08_BOTSDO01962);gene-GTA08_BOTSDO06148(GTA08_BOTSDO06148);gene-GTA08_BOTSDO07298(GTA08_BOTSDO07298);gene-GTA08_BOTSDO10351(GTA08_BOTSDO10351);gene-GTA08_BOTSDO11021(GTA08_BOTSDO11021);gene-GTA08_BOTSDO11490(GTA08_BOTSDO11490)	gene-GTA08_BOTSDO02849(GTA08_BOTSDO02849);gene-GTA08_BOTSDO04126(GTA08_BOTSDO04126);gene-GTA08_BOTSDO04889(GTA08_BOTSDO04889);gene-GTA08_BOTSDO09584(GTA08_BOTSDO09584);gene-GTA08_BOTSDO10108(GTA08_BOTSDO10108);gene-GTA08_BOTSDO11986(GTA08_BOTSDO11986)
GO:0016903	MF	oxidoreductase activity, acting on the aldehyde or oxo group of donors	0	9	9	43	0.00234747	0.0370006	-	gene-GTA08_BOTSDO01671(GTA08_BOTSDO01671);gene-GTA08_BOTSDO01958(GTA08_BOTSDO01958);gene-GTA08_BOTSDO07813(GTA08_BOTSDO07813);gene-GTA08_BOTSDO08028(GTA08_BOTSDO08028);gene-GTA08_BOTSDO09511(GTA08_BOTSDO09511);gene-GTA08_BOTSDO11740(GTA08_BOTSDO11740);gene-GTA08_BOTSDO12745(GTA08_BOTSDO12745);gene-GTA08_BOTSDO12850(GTA08_BOTSDO12850);gene-GTA08_BOTSDO13246(GTA08_BOTSDO13246)
GO:0008236	MF	serine-type peptidase activity	3	8	11	61	0.0028278	0.0390001	gene-GTA08_BOTSDO02702(GTA08_BOTSDO02702);gene-GTA08_BOTSDO08711(GTA08_BOTSDO08711);gene-GTA08_BOTSDO09315(GTA08_BOTSDO09315)	gene-GTA08_BOTSDO00884(GTA08_BOTSDO00884);gene-GTA08_BOTSDO01970(GTA08_BOTSDO01970);gene-GTA08_BOTSDO03475(GTA08_BOTSDO03475);gene-GTA08_BOTSDO07550(GTA08_BOTSDO07550);gene-GTA08_BOTSDO08773(GTA08_BOTSDO08773);gene-GTA08_BOTSDO08822(GTA08_BOTSDO08822);gene-GTA08_BOTSDO08828(GTA08_BOTSDO08828);gene-GTA08_BOTSDO09127(GTA08_BOTSDO09127)
GO:0016825	MF	hydrolase activity, acting on acid phosphorus-nitrogen bonds	3	8	11	61	0.0028278	0.0390001	gene-GTA08_BOTSDO02702(GTA08_BOTSDO02702);gene-GTA08_BOTSDO08711(GTA08_BOTSDO08711);gene-GTA08_BOTSDO09315(GTA08_BOTSDO09315)	gene-GTA08_BOTSDO00884(GTA08_BOTSDO00884);gene-GTA08_BOTSDO01970(GTA08_BOTSDO01970);gene-GTA08_BOTSDO03475(GTA08_BOTSDO03475);gene-GTA08_BOTSDO07550(GTA08_BOTSDO07550);gene-GTA08_BOTSDO08773(GTA08_BOTSDO08773);gene-GTA08_BOTSDO08822(GTA08_BOTSDO08822);gene-GTA08_BOTSDO08828(GTA08_BOTSDO08828);gene-GTA08_BOTSDO09127(GTA08_BOTSDO09127)
GO:0017171	MF	serine hydrolase activity	3	8	11	61	0.0028278	0.0390001	gene-GTA08_BOTSDO02702(GTA08_BOTSDO02702);gene-GTA08_BOTSDO08711(GTA08_BOTSDO08711);gene-GTA08_BOTSDO09315(GTA08_BOTSDO09315)	gene-GTA08_BOTSDO00884(GTA08_BOTSDO00884);gene-GTA08_BOTSDO01970(GTA08_BOTSDO01970);gene-GTA08_BOTSDO03475(GTA08_BOTSDO03475);gene-GTA08_BOTSDO07550(GTA08_BOTSDO07550);gene-GTA08_BOTSDO08773(GTA08_BOTSDO08773);gene-GTA08_BOTSDO08822(GTA08_BOTSDO08822);gene-GTA08_BOTSDO08828(GTA08_BOTSDO08828);gene-GTA08_BOTSDO09127(GTA08_BOTSDO09127)
GO:0004334	MF	fumarylacetoacetase activity	0	3	3	5	0.00300115	0.0397352	-	gene-GTA08_BOTSDO05479(GTA08_BOTSDO05479);gene-GTA08_BOTSDO06978(GTA08_BOTSDO06978);gene-GTA08_BOTSDO11171(GTA08_BOTSDO11171)
GO:0003862	MF	3-isopropylmalate dehydrogenase activity	2	0	2	2	0.00482175	0.0552731	gene-GTA08_BOTSDO07298(GTA08_BOTSDO07298);gene-GTA08_BOTSDO11490(GTA08_BOTSDO11490)	-
GO:0004619	MF	phosphoglycerate mutase activity	2	0	2	2	0.00482175	0.0552731	gene-GTA08_BOTSDO07018(GTA08_BOTSDO07018);gene-GTA08_BOTSDO11212(GTA08_BOTSDO11212)	-
GO:0051787	MF	misfolded protein binding	2	0	2	2	0.00482175	0.0552731	gene-GTA08_BOTSDO07275(GTA08_BOTSDO07275);gene-GTA08_BOTSDO11467(GTA08_BOTSDO11467)	-
GO:0030247	MF	polysaccharide binding	1	4	5	17	0.0048742	0.0552731	gene-GTA08_BOTSDO10907(GTA08_BOTSDO10907)	gene-GTA08_BOTSDO02133(GTA08_BOTSDO02133);gene-GTA08_BOTSDO05417(GTA08_BOTSDO05417);gene-GTA08_BOTSDO08820(GTA08_BOTSDO08820);gene-GTA08_BOTSDO11969(GTA08_BOTSDO11969)
GO:0004175	MF	endopeptidase activity	2	13	15	104	0.00517664	0.0552731	gene-GTA08_BOTSDO00147(GTA08_BOTSDO00147);gene-GTA08_BOTSDO07349(GTA08_BOTSDO07349)	gene-GTA08_BOTSDO01758(GTA08_BOTSDO01758);gene-GTA08_BOTSDO03475(GTA08_BOTSDO03475);gene-GTA08_BOTSDO03981(GTA08_BOTSDO03981);gene-GTA08_BOTSDO04544(GTA08_BOTSDO04544);gene-GTA08_BOTSDO07307(GTA08_BOTSDO07307);gene-GTA08_BOTSDO07550(GTA08_BOTSDO07550);gene-GTA08_BOTSDO08012(GTA08_BOTSDO08012);gene-GTA08_BOTSDO08025(GTA08_BOTSDO08025);gene-GTA08_BOTSDO08773(GTA08_BOTSDO08773);gene-GTA08_BOTSDO0882…
GO:0051213	MF	dioxygenase activity	2	13	15	104	0.00517664	0.0552731	gene-GTA08_BOTSDO07895(GTA08_BOTSDO07895);gene-GTA08_BOTSDO13211(GTA08_BOTSDO13211)	gene-GTA08_BOTSDO00195(GTA08_BOTSDO00195);gene-GTA08_BOTSDO00551(GTA08_BOTSDO00551);gene-GTA08_BOTSDO01227(GTA08_BOTSDO01227);gene-GTA08_BOTSDO01414(GTA08_BOTSDO01414);gene-GTA08_BOTSDO01506(GTA08_BOTSDO01506);gene-GTA08_BOTSDO02306(GTA08_BOTSDO02306);gene-GTA08_BOTSDO03132(GTA08_BOTSDO03132);gene-GTA08_BOTSDO05921(GTA08_BOTSDO05921);gene-GTA08_BOTSDO06534(GTA08_BOTSDO06534);gene-GTA08_BOTSDO0764…
GO:0010181	MF	FMN binding	3	6	9	50	0.00677042	0.0679094	gene-GTA08_BOTSDO00398(GTA08_BOTSDO00398);gene-GTA08_BOTSDO05273(GTA08_BOTSDO05273);gene-GTA08_BOTSDO05439(GTA08_BOTSDO05439)	gene-GTA08_BOTSDO01094(GTA08_BOTSDO01094);gene-GTA08_BOTSDO01703(GTA08_BOTSDO01703);gene-GTA08_BOTSDO07439(GTA08_BOTSDO07439);gene-GTA08_BOTSDO07677(GTA08_BOTSDO07677);gene-GTA08_BOTSDO07678(GTA08_BOTSDO07678);gene-GTA08_BOTSDO13582(GTA08_BOTSDO13582)
GO:0016684	MF	oxidoreductase activity, acting on peroxide as acceptor	3	6	9	50	0.00677042	0.0679094	gene-GTA08_BOTSDO01432(GTA08_BOTSDO01432);gene-GTA08_BOTSDO03402(GTA08_BOTSDO03402);gene-GTA08_BOTSDO13964(GTA08_BOTSDO13964)	gene-GTA08_BOTSDO01875(GTA08_BOTSDO01875);gene-GTA08_BOTSDO01877(GTA08_BOTSDO01877);gene-GTA08_BOTSDO02767(GTA08_BOTSDO02767);gene-GTA08_BOTSDO09766(GTA08_BOTSDO09766);gene-GTA08_BOTSDO10464(GTA08_BOTSDO10464);gene-GTA08_BOTSDO12189(GTA08_BOTSDO12189)
GO:0016614	MF	oxidoreductase activity, acting on CH-OH group of donors	8	15	23	194	0.00783451	0.0762713	gene-GTA08_BOTSDO01631(GTA08_BOTSDO01631);gene-GTA08_BOTSDO04104(GTA08_BOTSDO04104);gene-GTA08_BOTSDO04504(GTA08_BOTSDO04504);gene-GTA08_BOTSDO07298(GTA08_BOTSDO07298);gene-GTA08_BOTSDO08520(GTA08_BOTSDO08520);gene-GTA08_BOTSDO11021(GTA08_BOTSDO11021);gene-GTA08_BOTSDO11490(GTA08_BOTSDO11490);gene-GTA08_BOTSDO13637(GTA08_BOTSDO13637)	gene-GTA08_BOTSDO00341(GTA08_BOTSDO00341);gene-GTA08_BOTSDO02849(GTA08_BOTSDO02849);gene-GTA08_BOTSDO03123(GTA08_BOTSDO03123);gene-GTA08_BOTSDO04126(GTA08_BOTSDO04126);gene-GTA08_BOTSDO04526(GTA08_BOTSDO04526);gene-GTA08_BOTSDO04889(GTA08_BOTSDO04889);gene-GTA08_BOTSDO05318(GTA08_BOTSDO05318);gene-GTA08_BOTSDO05511(GTA08_BOTSDO05511);gene-GTA08_BOTSDO06896(GTA08_BOTSDO06896);gene-GTA08_BOTSDO0796…
GO:0016829	MF	lyase activity	7	16	23	196	0.00884055	0.0836064	gene-GTA08_BOTSDO00408(GTA08_BOTSDO00408);gene-GTA08_BOTSDO00409(GTA08_BOTSDO00409);gene-GTA08_BOTSDO01290(GTA08_BOTSDO01290);gene-GTA08_BOTSDO04508(GTA08_BOTSDO04508);gene-GTA08_BOTSDO07016(GTA08_BOTSDO07016);gene-GTA08_BOTSDO07501(GTA08_BOTSDO07501);gene-GTA08_BOTSDO09638(GTA08_BOTSDO09638)	gene-GTA08_BOTSDO00716(GTA08_BOTSDO00716);gene-GTA08_BOTSDO02221(GTA08_BOTSDO02221);gene-GTA08_BOTSDO02847(GTA08_BOTSDO02847);gene-GTA08_BOTSDO04004(GTA08_BOTSDO04004);gene-GTA08_BOTSDO04355(GTA08_BOTSDO04355);gene-GTA08_BOTSDO05680(GTA08_BOTSDO05680);gene-GTA08_BOTSDO08000(GTA08_BOTSDO08000);gene-GTA08_BOTSDO08034(GTA08_BOTSDO08034);gene-GTA08_BOTSDO08189(GTA08_BOTSDO08189);gene-GTA08_BOTSDO0846…
GO:0016822	MF	hydrolase activity, acting on acid carbon-carbon bonds	0	3	3	7	0.00945317	0.0845676	-	gene-GTA08_BOTSDO05479(GTA08_BOTSDO05479);gene-GTA08_BOTSDO06978(GTA08_BOTSDO06978);gene-GTA08_BOTSDO11171(GTA08_BOTSDO11171)
GO:0016823	MF	hydrolase activity, acting on acid carbon-carbon bonds, in ketonic substances	0	3	3	7	0.00945317	0.0845676	-	gene-GTA08_BOTSDO05479(GTA08_BOTSDO05479);gene-GTA08_BOTSDO06978(GTA08_BOTSDO06978);gene-GTA08_BOTSDO11171(GTA08_BOTSDO11171)
GO:0003979	MF	UDP-glucose 6-dehydrogenase activity	0	2	2	3	0.0137978	0.120186	-	gene-GTA08_BOTSDO02849(GTA08_BOTSDO02849);gene-GTA08_BOTSDO09584(GTA08_BOTSDO09584)
GO:0000287	MF	magnesium ion binding	5	4	9	57	0.0158252	0.134311	gene-GTA08_BOTSDO07016(GTA08_BOTSDO07016);gene-GTA08_BOTSDO07298(GTA08_BOTSDO07298);gene-GTA08_BOTSDO11021(GTA08_BOTSDO11021);gene-GTA08_BOTSDO11135(GTA08_BOTSDO11135);gene-GTA08_BOTSDO11490(GTA08_BOTSDO11490)	gene-GTA08_BOTSDO01818(GTA08_BOTSDO01818);gene-GTA08_BOTSDO10108(GTA08_BOTSDO10108);gene-GTA08_BOTSDO11445(GTA08_BOTSDO11445);gene-GTA08_BOTSDO13890(GTA08_BOTSDO13890)
GO:0004185	MF	serine-type carboxypeptidase activity	2	2	4	15	0.0169907	0.137169	gene-GTA08_BOTSDO02702(GTA08_BOTSDO02702);gene-GTA08_BOTSDO08711(GTA08_BOTSDO08711)	gene-GTA08_BOTSDO01970(GTA08_BOTSDO01970);gene-GTA08_BOTSDO09127(GTA08_BOTSDO09127)
GO:0070008	MF	serine-type exopeptidase activity	2	2	4	15	0.0169907	0.137169	gene-GTA08_BOTSDO02702(GTA08_BOTSDO02702);gene-GTA08_BOTSDO08711(GTA08_BOTSDO08711)	gene-GTA08_BOTSDO01970(GTA08_BOTSDO01970);gene-GTA08_BOTSDO09127(GTA08_BOTSDO09127)
GO:0030976	MF	thiamine pyrophosphate binding	1	2	3	9	0.0204342	0.149318	gene-GTA08_BOTSDO07016(GTA08_BOTSDO07016)	gene-GTA08_BOTSDO01818(GTA08_BOTSDO01818);gene-GTA08_BOTSDO13890(GTA08_BOTSDO13890)
GO:0016831	MF	carboxy-lyase activity	2	4	6	32	0.0210171	0.149318	gene-GTA08_BOTSDO04508(GTA08_BOTSDO04508);gene-GTA08_BOTSDO07016(GTA08_BOTSDO07016)	gene-GTA08_BOTSDO02847(GTA08_BOTSDO02847);gene-GTA08_BOTSDO05680(GTA08_BOTSDO05680);gene-GTA08_BOTSDO08782(GTA08_BOTSDO08782);gene-GTA08_BOTSDO13890(GTA08_BOTSDO13890)
GO:0004601	MF	peroxidase activity	3	4	7	41	0.0213805	0.149318	gene-GTA08_BOTSDO01432(GTA08_BOTSDO01432);gene-GTA08_BOTSDO03402(GTA08_BOTSDO03402);gene-GTA08_BOTSDO13964(GTA08_BOTSDO13964)	gene-GTA08_BOTSDO02767(GTA08_BOTSDO02767);gene-GTA08_BOTSDO09766(GTA08_BOTSDO09766);gene-GTA08_BOTSDO10464(GTA08_BOTSDO10464);gene-GTA08_BOTSDO12189(GTA08_BOTSDO12189)
GO:0030248	MF	cellulose binding	1	3	4	16	0.0214391	0.149318	gene-GTA08_BOTSDO10907(GTA08_BOTSDO10907)	gene-GTA08_BOTSDO02133(GTA08_BOTSDO02133);gene-GTA08_BOTSDO05417(GTA08_BOTSDO05417);gene-GTA08_BOTSDO08820(GTA08_BOTSDO08820)
GO:0070011	MF	peptidase activity, acting on L-amino acid peptides	5	19	24	224	0.0216188	0.149318	gene-GTA08_BOTSDO00147(GTA08_BOTSDO00147);gene-GTA08_BOTSDO02702(GTA08_BOTSDO02702);gene-GTA08_BOTSDO07349(GTA08_BOTSDO07349);gene-GTA08_BOTSDO08711(GTA08_BOTSDO08711);gene-GTA08_BOTSDO09315(GTA08_BOTSDO09315)	gene-GTA08_BOTSDO00884(GTA08_BOTSDO00884);gene-GTA08_BOTSDO01758(GTA08_BOTSDO01758);gene-GTA08_BOTSDO01970(GTA08_BOTSDO01970);gene-GTA08_BOTSDO02339(GTA08_BOTSDO02339);gene-GTA08_BOTSDO03475(GTA08_BOTSDO03475);gene-GTA08_BOTSDO03981(GTA08_BOTSDO03981);gene-GTA08_BOTSDO04544(GTA08_BOTSDO04544);gene-GTA08_BOTSDO05396(GTA08_BOTSDO05396);gene-GTA08_BOTSDO07307(GTA08_BOTSDO07307);gene-GTA08_BOTSDO0755…
GO:0016209	MF	antioxidant activity	3	6	9	60	0.0216534	0.149318	gene-GTA08_BOTSDO01432(GTA08_BOTSDO01432);gene-GTA08_BOTSDO03402(GTA08_BOTSDO03402);gene-GTA08_BOTSDO13964(GTA08_BOTSDO13964)	gene-GTA08_BOTSDO01875(GTA08_BOTSDO01875);gene-GTA08_BOTSDO01877(GTA08_BOTSDO01877);gene-GTA08_BOTSDO02767(GTA08_BOTSDO02767);gene-GTA08_BOTSDO09766(GTA08_BOTSDO09766);gene-GTA08_BOTSDO10464(GTA08_BOTSDO10464);gene-GTA08_BOTSDO12189(GTA08_BOTSDO12189)
GO:0016627	MF	oxidoreductase activity, acting on the CH-CH group of donors	2	7	9	60	0.0216534	0.149318	gene-GTA08_BOTSDO11898(GTA08_BOTSDO11898);gene-GTA08_BOTSDO13426(GTA08_BOTSDO13426)	gene-GTA08_BOTSDO02849(GTA08_BOTSDO02849);gene-GTA08_BOTSDO05316(GTA08_BOTSDO05316);gene-GTA08_BOTSDO06384(GTA08_BOTSDO06384);gene-GTA08_BOTSDO08030(GTA08_BOTSDO08030);gene-GTA08_BOTSDO08031(GTA08_BOTSDO08031);gene-GTA08_BOTSDO09584(GTA08_BOTSDO09584);gene-GTA08_BOTSDO09599(GTA08_BOTSDO09599)
GO:0004499	MF	N,N-dimethylaniline monooxygenase activity	0	5	5	25	0.0264519	0.172223	-	gene-GTA08_BOTSDO00783(GTA08_BOTSDO00783);gene-GTA08_BOTSDO01413(GTA08_BOTSDO01413);gene-GTA08_BOTSDO05861(GTA08_BOTSDO05861);gene-GTA08_BOTSDO06395(GTA08_BOTSDO06395);gene-GTA08_BOTSDO10814(GTA08_BOTSDO10814)
GO:0008081	MF	phosphoric diester hydrolase activity	4	1	5	25	0.0264519	0.172223	gene-GTA08_BOTSDO01243(GTA08_BOTSDO01243);gene-GTA08_BOTSDO05268(GTA08_BOTSDO05268);gene-GTA08_BOTSDO05964(GTA08_BOTSDO05964);gene-GTA08_BOTSDO12331(GTA08_BOTSDO12331)	gene-GTA08_BOTSDO13342(GTA08_BOTSDO13342)
GO:0003995	MF	acyl-CoA dehydrogenase activity	0	4	4	17	0.0265359	0.172223	-	gene-GTA08_BOTSDO05316(GTA08_BOTSDO05316);gene-GTA08_BOTSDO08030(GTA08_BOTSDO08030);gene-GTA08_BOTSDO08031(GTA08_BOTSDO08031);gene-GTA08_BOTSDO09599(GTA08_BOTSDO09599)
GO:0070403	MF	NAD+ binding	3	0	3	10	0.0277125	0.176401	gene-GTA08_BOTSDO01962(GTA08_BOTSDO01962);gene-GTA08_BOTSDO06148(GTA08_BOTSDO06148);gene-GTA08_BOTSDO10351(GTA08_BOTSDO10351)	-
GO:0016810	MF	hydrolase activity, acting on carbon-nitrogen (but not peptide) bonds	2	10	12	98	0.038109	0.238002	gene-GTA08_BOTSDO03811(GTA08_BOTSDO03811);gene-GTA08_BOTSDO09639(GTA08_BOTSDO09639)	gene-GTA08_BOTSDO00350(GTA08_BOTSDO00350);gene-GTA08_BOTSDO02647(GTA08_BOTSDO02647);gene-GTA08_BOTSDO03188(GTA08_BOTSDO03188);gene-GTA08_BOTSDO04401(GTA08_BOTSDO04401);gene-GTA08_BOTSDO04443(GTA08_BOTSDO04443);gene-GTA08_BOTSDO05274(GTA08_BOTSDO05274);gene-GTA08_BOTSDO05670(GTA08_BOTSDO05670);gene-GTA08_BOTSDO08598(GTA08_BOTSDO08598);gene-GTA08_BOTSDO11171(GTA08_BOTSDO11171);gene-GTA08_BOTSDO1168…
GO:0004069	MF	L-aspartate:2-oxoglutarate aminotransferase activity	2	0	2	5	0.0418822	0.24321	gene-GTA08_BOTSDO02628(GTA08_BOTSDO02628);gene-GTA08_BOTSDO07725(GTA08_BOTSDO07725)	-
GO:0008793	MF	aromatic-amino-acid:2-oxoglutarate aminotransferase activity	2	0	2	5	0.0418822	0.24321	gene-GTA08_BOTSDO02628(GTA08_BOTSDO02628);gene-GTA08_BOTSDO07725(GTA08_BOTSDO07725)	-
GO:0070546	MF	L-phenylalanine aminotransferase activity	2	0	2	5	0.0418822	0.24321	gene-GTA08_BOTSDO02628(GTA08_BOTSDO02628);gene-GTA08_BOTSDO07725(GTA08_BOTSDO07725)	-
GO:0080130	MF	L-phenylalanine:2-oxoglutarate aminotransferase activity	2	0	2	5	0.0418822	0.24321	gene-GTA08_BOTSDO02628(GTA08_BOTSDO02628);gene-GTA08_BOTSDO07725(GTA08_BOTSDO07725)	-
GO:0016830	MF	carbon-carbon lyase activity	2	5	7	48	0.0462788	0.244776	gene-GTA08_BOTSDO04508(GTA08_BOTSDO04508);gene-GTA08_BOTSDO07016(GTA08_BOTSDO07016)	gene-GTA08_BOTSDO02221(GTA08_BOTSDO02221);gene-GTA08_BOTSDO02847(GTA08_BOTSDO02847);gene-GTA08_BOTSDO05680(GTA08_BOTSDO05680);gene-GTA08_BOTSDO08782(GTA08_BOTSDO08782);gene-GTA08_BOTSDO13890(GTA08_BOTSDO13890)
GO:0004252	MF	serine-type endopeptidase activity	0	5	5	30	0.053477	0.244776	-	gene-GTA08_BOTSDO03475(GTA08_BOTSDO03475);gene-GTA08_BOTSDO07550(GTA08_BOTSDO07550);gene-GTA08_BOTSDO08773(GTA08_BOTSDO08773);gene-GTA08_BOTSDO08822(GTA08_BOTSDO08822);gene-GTA08_BOTSDO08828(GTA08_BOTSDO08828)
GO:0016837	MF	carbon-oxygen lyase activity, acting on polysaccharides	1	2	3	13	0.0565787	0.244776	gene-GTA08_BOTSDO00408(GTA08_BOTSDO00408)	gene-GTA08_BOTSDO04355(GTA08_BOTSDO04355);gene-GTA08_BOTSDO08034(GTA08_BOTSDO08034)
GO:0016840	MF	carbon-nitrogen lyase activity	0	2	2	6	0.0599765	0.244776	-	gene-GTA08_BOTSDO00716(GTA08_BOTSDO00716);gene-GTA08_BOTSDO08000(GTA08_BOTSDO08000)
GO:0031176	MF	endo-1,4-beta-xylanase activity	0	2	2	6	0.0599765	0.244776	-	gene-GTA08_BOTSDO02133(GTA08_BOTSDO02133);gene-GTA08_BOTSDO13846(GTA08_BOTSDO13846)
GO:0008233	MF	peptidase activity	5	19	24	249	0.0625725	0.244776	gene-GTA08_BOTSDO00147(GTA08_BOTSDO00147);gene-GTA08_BOTSDO02702(GTA08_BOTSDO02702);gene-GTA08_BOTSDO07349(GTA08_BOTSDO07349);gene-GTA08_BOTSDO08711(GTA08_BOTSDO08711);gene-GTA08_BOTSDO09315(GTA08_BOTSDO09315)	gene-GTA08_BOTSDO00884(GTA08_BOTSDO00884);gene-GTA08_BOTSDO01758(GTA08_BOTSDO01758);gene-GTA08_BOTSDO01970(GTA08_BOTSDO01970);gene-GTA08_BOTSDO02339(GTA08_BOTSDO02339);gene-GTA08_BOTSDO03475(GTA08_BOTSDO03475);gene-GTA08_BOTSDO03981(GTA08_BOTSDO03981);gene-GTA08_BOTSDO04544(GTA08_BOTSDO04544);gene-GTA08_BOTSDO05396(GTA08_BOTSDO05396);gene-GTA08_BOTSDO07307(GTA08_BOTSDO07307);gene-GTA08_BOTSDO0755…
GO:1901681	MF	sulfur compound binding	1	2	3	14	0.068418	0.244776	gene-GTA08_BOTSDO07016(GTA08_BOTSDO07016)	gene-GTA08_BOTSDO01818(GTA08_BOTSDO01818);gene-GTA08_BOTSDO13890(GTA08_BOTSDO13890)
GO:0000257	MF	nitrilase activity	0	1	1	1	0.0695136	0.244776	-	gene-GTA08_BOTSDO03188(GTA08_BOTSDO03188)
GO:0003868	MF	4-hydroxyphenylpyruvate dioxygenase activity	0	1	1	1	0.0695136	0.244776	-	gene-GTA08_BOTSDO00195(GTA08_BOTSDO00195)
GO:0004339	MF	glucan 1,4-alpha-glucosidase activity	0	1	1	1	0.0695136	0.244776	-	gene-GTA08_BOTSDO11969(GTA08_BOTSDO11969)
GO:0004491	MF	methylmalonate-semialdehyde dehydrogenase (acylating) activity	0	1	1	1	0.0695136	0.244776	-	gene-GTA08_BOTSDO13246(GTA08_BOTSDO13246)
GO:0004608	MF	phosphatidylethanolamine N-methyltransferase activity	0	1	1	1	0.0695136	0.244776	-	gene-GTA08_BOTSDO01769(GTA08_BOTSDO01769)
GO:0005179	MF	hormone activity	0	1	1	1	0.0695136	0.244776	-	gene-GTA08_BOTSDO03596(GTA08_BOTSDO03596)
GO:0005354	MF	galactose transmembrane transporter activity	0	1	1	1	0.0695136	0.244776	-	gene-GTA08_BOTSDO13953(GTA08_BOTSDO13953)
GO:0008430	MF	selenium binding	0	1	1	1	0.0695136	0.244776	-	gene-GTA08_BOTSDO03339(GTA08_BOTSDO03339)
GO:0008812	MF	choline dehydrogenase activity	0	1	1	1	0.0695136	0.244776	-	gene-GTA08_BOTSDO13523(GTA08_BOTSDO13523)
GO:0008824	MF	cyanate hydratase activity	0	1	1	1	0.0695136	0.244776	-	gene-GTA08_BOTSDO08000(GTA08_BOTSDO08000)
GO:0009679	MF	hexose:proton symporter activity	0	1	1	1	0.0695136	0.244776	-	gene-GTA08_BOTSDO13953(GTA08_BOTSDO13953)
GO:0009916	MF	alternative oxidase activity	1	0	1	1	0.0695136	0.244776	gene-GTA08_BOTSDO10674(GTA08_BOTSDO10674)	-
GO:0015140	MF	malate transmembrane transporter activity	1	0	1	1	0.0695136	0.244776	gene-GTA08_BOTSDO04858(GTA08_BOTSDO04858)	-
GO:0015146	MF	pentose transmembrane transporter activity	0	1	1	1	0.0695136	0.244776	-	gene-GTA08_BOTSDO13953(GTA08_BOTSDO13953)
GO:0015150	MF	fucose transmembrane transporter activity	0	1	1	1	0.0695136	0.244776	-	gene-GTA08_BOTSDO13953(GTA08_BOTSDO13953)
GO:0015517	MF	galactose:proton symporter activity	0	1	1	1	0.0695136	0.244776	-	gene-GTA08_BOTSDO13953(GTA08_BOTSDO13953)
GO:0015518	MF	arabinose:proton symporter activity	0	1	1	1	0.0695136	0.244776	-	gene-GTA08_BOTSDO13953(GTA08_BOTSDO13953)
GO:0015535	MF	fucose:proton symporter activity	0	1	1	1	0.0695136	0.244776	-	gene-GTA08_BOTSDO13953(GTA08_BOTSDO13953)
GO:0016815	MF	hydrolase activity, acting on carbon-nitrogen (but not peptide) bonds, in nitriles	0	1	1	1	0.0695136	0.244776	-	gene-GTA08_BOTSDO03188(GTA08_BOTSDO03188)
GO:0017168	MF	5-oxoprolinase (ATP-hydrolyzing) activity	0	1	1	1	0.0695136	0.244776	-	gene-GTA08_BOTSDO04401(GTA08_BOTSDO04401)
GO:0030411	MF	scytalone dehydratase activity	0	1	1	1	0.0695136	0.244776	-	gene-GTA08_BOTSDO09837(GTA08_BOTSDO09837)
GO:0030545	MF	receptor regulator activity	0	1	1	1	0.0695136	0.244776	-	gene-GTA08_BOTSDO03596(GTA08_BOTSDO03596)
GO:0030546	MF	signaling receptor activator activity	0	1	1	1	0.0695136	0.244776	-	gene-GTA08_BOTSDO03596(GTA08_BOTSDO03596)
GO:0042900	MF	arabinose transmembrane transporter activity	0	1	1	1	0.0695136	0.244776	-	gene-GTA08_BOTSDO13953(GTA08_BOTSDO13953)
GO:0045548	MF	phenylalanine ammonia-lyase activity	0	1	1	1	0.0695136	0.244776	-	gene-GTA08_BOTSDO00716(GTA08_BOTSDO00716)
GO:0047428	MF	arylacetonitrilase activity	0	1	1	1	0.0695136	0.244776	-	gene-GTA08_BOTSDO03188(GTA08_BOTSDO03188)
GO:0048018	MF	receptor ligand activity	0	1	1	1	0.0695136	0.244776	-	gene-GTA08_BOTSDO03596(GTA08_BOTSDO03596)
GO:0050440	MF	2-methylcitrate synthase activity	0	1	1	1	0.0695136	0.244776	-	gene-GTA08_BOTSDO07597(GTA08_BOTSDO07597)
GO:0070330	MF	aromatase activity	1	0	1	1	0.0695136	0.244776	gene-GTA08_BOTSDO05439(GTA08_BOTSDO05439)	-
GO:2001070	MF	starch binding	0	1	1	1	0.0695136	0.244776	-	gene-GTA08_BOTSDO11969(GTA08_BOTSDO11969)
GO:0008131	MF	primary amine oxidase activity	0	2	2	7	0.0801858	0.273554	-	gene-GTA08_BOTSDO01717(GTA08_BOTSDO01717);gene-GTA08_BOTSDO09755(GTA08_BOTSDO09755)
GO:0016868	MF	intramolecular transferase activity, phosphotransferases	2	0	2	7	0.0801858	0.273554	gene-GTA08_BOTSDO07018(GTA08_BOTSDO07018);gene-GTA08_BOTSDO11212(GTA08_BOTSDO11212)	-
GO:0097599	MF	xylanase activity	0	2	2	7	0.0801858	0.273554	-	gene-GTA08_BOTSDO02133(GTA08_BOTSDO02133);gene-GTA08_BOTSDO13846(GTA08_BOTSDO13846)
GO:0016846	MF	carbon-sulfur lyase activity	1	3	4	24	0.0809919	0.273554	gene-GTA08_BOTSDO09638(GTA08_BOTSDO09638)	gene-GTA08_BOTSDO04004(GTA08_BOTSDO04004);gene-GTA08_BOTSDO11609(GTA08_BOTSDO11609);gene-GTA08_BOTSDO12904(GTA08_BOTSDO12904)
GO:0050661	MF	NADP binding	0	6	6	44	0.0818288	0.273589	-	gene-GTA08_BOTSDO00783(GTA08_BOTSDO00783);gene-GTA08_BOTSDO01413(GTA08_BOTSDO01413);gene-GTA08_BOTSDO03886(GTA08_BOTSDO03886);gene-GTA08_BOTSDO05861(GTA08_BOTSDO05861);gene-GTA08_BOTSDO06395(GTA08_BOTSDO06395);gene-GTA08_BOTSDO10814(GTA08_BOTSDO10814)
GO:0016709	MF	oxidoreductase activity, acting on paired donors, with incorporation or reduction of molecular oxygen, NAD(P)H as one donor, and incorporation of one atom of oxygen	0	5	5	35	0.0921257	0.304936	-	gene-GTA08_BOTSDO00783(GTA08_BOTSDO00783);gene-GTA08_BOTSDO01413(GTA08_BOTSDO01413);gene-GTA08_BOTSDO05861(GTA08_BOTSDO05861);gene-GTA08_BOTSDO06395(GTA08_BOTSDO06395);gene-GTA08_BOTSDO10814(GTA08_BOTSDO10814)
GO:0004560	MF	alpha-L-fucosidase activity	0	2	2	8	0.10213	0.328204	-	gene-GTA08_BOTSDO02095(GTA08_BOTSDO02095);gene-GTA08_BOTSDO03710(GTA08_BOTSDO03710)
GO:0015928	MF	fucosidase activity	0	2	2	8	0.10213	0.328204	-	gene-GTA08_BOTSDO02095(GTA08_BOTSDO02095);gene-GTA08_BOTSDO03710(GTA08_BOTSDO03710)
GO:0016813	MF	hydrolase activity, acting on carbon-nitrogen (but not peptide) bonds, in linear amidines	0	2	2	8	0.10213	0.328204	-	gene-GTA08_BOTSDO00350(GTA08_BOTSDO00350);gene-GTA08_BOTSDO04443(GTA08_BOTSDO04443)
GO:0016616	MF	oxidoreductase activity, acting on the CH-OH group of donors, NAD or NADP as acceptor	4	6	10	93	0.110183	0.35068	gene-GTA08_BOTSDO07298(GTA08_BOTSDO07298);gene-GTA08_BOTSDO08520(GTA08_BOTSDO08520);gene-GTA08_BOTSDO11021(GTA08_BOTSDO11021);gene-GTA08_BOTSDO11490(GTA08_BOTSDO11490)	gene-GTA08_BOTSDO02849(GTA08_BOTSDO02849);gene-GTA08_BOTSDO04126(GTA08_BOTSDO04126);gene-GTA08_BOTSDO04889(GTA08_BOTSDO04889);gene-GTA08_BOTSDO09584(GTA08_BOTSDO09584);gene-GTA08_BOTSDO10108(GTA08_BOTSDO10108);gene-GTA08_BOTSDO11986(GTA08_BOTSDO11986)
GO:0016702	MF	oxidoreductase activity, acting on single donors with incorporation of molecular oxygen, incorporation of two atoms of oxygen	1	3	4	28	0.126041	0.365585	gene-GTA08_BOTSDO13211(GTA08_BOTSDO13211)	gene-GTA08_BOTSDO00195(GTA08_BOTSDO00195);gene-GTA08_BOTSDO06534(GTA08_BOTSDO06534);gene-GTA08_BOTSDO13710(GTA08_BOTSDO13710)
GO:0004108	MF	citrate (Si)-synthase activity	0	1	1	2	0.134205	0.365585	-	gene-GTA08_BOTSDO07597(GTA08_BOTSDO07597)
GO:0004139	MF	deoxyribose-phosphate aldolase activity	0	1	1	2	0.134205	0.365585	-	gene-GTA08_BOTSDO02221(GTA08_BOTSDO02221)
GO:0004160	MF	dihydroxy-acid dehydratase activity	0	1	1	2	0.134205	0.365585	-	gene-GTA08_BOTSDO11714(GTA08_BOTSDO11714)
GO:0004370	MF	glycerol kinase activity	0	1	1	2	0.134205	0.365585	-	gene-GTA08_BOTSDO13610(GTA08_BOTSDO13610)
GO:0004399	MF	histidinol dehydrogenase activity	0	1	1	2	0.134205	0.365585	-	gene-GTA08_BOTSDO04126(GTA08_BOTSDO04126)
GO:0004411	MF	homogentisate 1,2-dioxygenase activity	0	1	1	2	0.134205	0.365585	-	gene-GTA08_BOTSDO06534(GTA08_BOTSDO06534)
GO:0004421	MF	hydroxymethylglutaryl-CoA synthase activity	1	0	1	2	0.134205	0.365585	gene-GTA08_BOTSDO01186(GTA08_BOTSDO01186)	-
GO:0004450	MF	isocitrate dehydrogenase (NADP+) activity	1	0	1	2	0.134205	0.365585	gene-GTA08_BOTSDO11021(GTA08_BOTSDO11021)	-
GO:0004617	MF	phosphoglycerate dehydrogenase activity	0	1	1	2	0.134205	0.365585	-	gene-GTA08_BOTSDO11986(GTA08_BOTSDO11986)
GO:0004751	MF	ribose-5-phosphate isomerase activity	0	1	1	2	0.134205	0.365585	-	gene-GTA08_BOTSDO03965(GTA08_BOTSDO03965)
GO:0008553	MF	proton-exporting ATPase activity, phosphorylative mechanism	0	1	1	2	0.134205	0.365585	-	gene-GTA08_BOTSDO00110(GTA08_BOTSDO00110)
GO:0008889	MF	glycerophosphodiester phosphodiesterase activity	0	1	1	2	0.134205	0.365585	-	gene-GTA08_BOTSDO13342(GTA08_BOTSDO13342)
GO:0015556	MF	C4-dicarboxylate transmembrane transporter activity	1	0	1	2	0.134205	0.365585	gene-GTA08_BOTSDO04858(GTA08_BOTSDO04858)	-
GO:0016682	MF	oxidoreductase activity, acting on diphenols and related substances as donors, oxygen as acceptor	1	0	1	2	0.134205	0.365585	gene-GTA08_BOTSDO10674(GTA08_BOTSDO10674)	-
GO:0016841	MF	ammonia-lyase activity	0	1	1	2	0.134205	0.365585	-	gene-GTA08_BOTSDO00716(GTA08_BOTSDO00716)
GO:0036440	MF	citrate synthase activity	0	1	1	2	0.134205	0.365585	-	gene-GTA08_BOTSDO07597(GTA08_BOTSDO07597)
GO:0019842	MF	vitamin binding	6	5	11	109	0.134747	0.365585	gene-GTA08_BOTSDO02628(GTA08_BOTSDO02628);gene-GTA08_BOTSDO04508(GTA08_BOTSDO04508);gene-GTA08_BOTSDO06380(GTA08_BOTSDO06380);gene-GTA08_BOTSDO07016(GTA08_BOTSDO07016);gene-GTA08_BOTSDO07725(GTA08_BOTSDO07725);gene-GTA08_BOTSDO08188(GTA08_BOTSDO08188)	gene-GTA08_BOTSDO01818(GTA08_BOTSDO01818);gene-GTA08_BOTSDO05680(GTA08_BOTSDO05680);gene-GTA08_BOTSDO08126(GTA08_BOTSDO08126);gene-GTA08_BOTSDO11497(GTA08_BOTSDO11497);gene-GTA08_BOTSDO13890(GTA08_BOTSDO13890)
GO:0008061	MF	chitin binding	1	1	2	10	0.149912	0.396966	gene-GTA08_BOTSDO04104(GTA08_BOTSDO04104)	gene-GTA08_BOTSDO07545(GTA08_BOTSDO07545)
GO:0030570	MF	pectate lyase activity	1	1	2	10	0.149912	0.396966	gene-GTA08_BOTSDO00408(GTA08_BOTSDO00408)	gene-GTA08_BOTSDO08034(GTA08_BOTSDO08034)
GO:0048038	MF	quinone binding	0	2	2	10	0.149912	0.396966	-	gene-GTA08_BOTSDO01717(GTA08_BOTSDO01717);gene-GTA08_BOTSDO09755(GTA08_BOTSDO09755)
GO:0004180	MF	carboxypeptidase activity	2	2	4	30	0.15177	0.398698	gene-GTA08_BOTSDO02702(GTA08_BOTSDO02702);gene-GTA08_BOTSDO08711(GTA08_BOTSDO08711)	gene-GTA08_BOTSDO01970(GTA08_BOTSDO01970);gene-GTA08_BOTSDO09127(GTA08_BOTSDO09127)
GO:0046912	MF	transferase activity, transferring acyl groups, acyl groups converted into alkyl on transfer	1	1	2	11	0.175185	0.451578	gene-GTA08_BOTSDO01186(GTA08_BOTSDO01186)	gene-GTA08_BOTSDO07597(GTA08_BOTSDO07597)
GO:0051920	MF	peroxiredoxin activity	0	2	2	11	0.175185	0.451578	-	gene-GTA08_BOTSDO01875(GTA08_BOTSDO01875);gene-GTA08_BOTSDO01877(GTA08_BOTSDO01877)
GO:0005507	MF	copper ion binding	3	2	5	43	0.175993	0.451578	gene-GTA08_BOTSDO05313(GTA08_BOTSDO05313);gene-GTA08_BOTSDO11748(GTA08_BOTSDO11748);gene-GTA08_BOTSDO14120(GTA08_BOTSDO14120)	gene-GTA08_BOTSDO01717(GTA08_BOTSDO01717);gene-GTA08_BOTSDO09755(GTA08_BOTSDO09755)
GO:0003842	MF	1-pyrroline-5-carboxylate dehydrogenase activity	0	1	1	3	0.194409	0.476663	-	gene-GTA08_BOTSDO09511(GTA08_BOTSDO09511)
GO:0003958	MF	NADPH-hemoprotein reductase activity	1	0	1	3	0.194409	0.476663	gene-GTA08_BOTSDO05439(GTA08_BOTSDO05439)	-
GO:0008452	MF	RNA ligase activity	1	0	1	3	0.194409	0.476663	gene-GTA08_BOTSDO05153(GTA08_BOTSDO05153)	-
GO:0015145	MF	monosaccharide transmembrane transporter activity	0	1	1	3	0.194409	0.476663	-	gene-GTA08_BOTSDO13953(GTA08_BOTSDO13953)
GO:0015149	MF	hexose transmembrane transporter activity	0	1	1	3	0.194409	0.476663	-	gene-GTA08_BOTSDO13953(GTA08_BOTSDO13953)
GO:0051119	MF	sugar transmembrane transporter activity	0	1	1	3	0.194409	0.476663	-	gene-GTA08_BOTSDO13953(GTA08_BOTSDO13953)
GO:0016641	MF	oxidoreductase activity, acting on the CH-NH2 group of donors, oxygen as acceptor	0	2	2	12	0.201059	0.48577	-	gene-GTA08_BOTSDO01717(GTA08_BOTSDO01717);gene-GTA08_BOTSDO09755(GTA08_BOTSDO09755)
GO:0030145	MF	manganese ion binding	2	0	2	12	0.201059	0.48577	gene-GTA08_BOTSDO07018(GTA08_BOTSDO07018);gene-GTA08_BOTSDO11212(GTA08_BOTSDO11212)	-
GO:0017056	MF	structural constituent of nuclear pore	0	4	4	34	0.208326	0.49968	-	gene-GTA08_BOTSDO05301(GTA08_BOTSDO05301);gene-GTA08_BOTSDO05670(GTA08_BOTSDO05670);gene-GTA08_BOTSDO08034(GTA08_BOTSDO08034);gene-GTA08_BOTSDO08265(GTA08_BOTSDO08265)
GO:0030170	MF	pyridoxal phosphate binding	5	2	7	70	0.211539	0.500139	gene-GTA08_BOTSDO02628(GTA08_BOTSDO02628);gene-GTA08_BOTSDO04508(GTA08_BOTSDO04508);gene-GTA08_BOTSDO06380(GTA08_BOTSDO06380);gene-GTA08_BOTSDO07725(GTA08_BOTSDO07725);gene-GTA08_BOTSDO08188(GTA08_BOTSDO08188)	gene-GTA08_BOTSDO05680(GTA08_BOTSDO05680);gene-GTA08_BOTSDO11497(GTA08_BOTSDO11497)
GO:0070279	MF	vitamin B6 binding	5	2	7	70	0.211539	0.500139	gene-GTA08_BOTSDO02628(GTA08_BOTSDO02628);gene-GTA08_BOTSDO04508(GTA08_BOTSDO04508);gene-GTA08_BOTSDO06380(GTA08_BOTSDO06380);gene-GTA08_BOTSDO07725(GTA08_BOTSDO07725);gene-GTA08_BOTSDO08188(GTA08_BOTSDO08188)	gene-GTA08_BOTSDO05680(GTA08_BOTSDO05680);gene-GTA08_BOTSDO11497(GTA08_BOTSDO11497)
GO:0004659	MF	prenyltransferase activity	2	0	2	13	0.227328	0.529898	gene-GTA08_BOTSDO09576(GTA08_BOTSDO09576);gene-GTA08_BOTSDO09620(GTA08_BOTSDO09620)	-
GO:0008484	MF	sulfuric ester hydrolase activity	0	2	2	13	0.227328	0.529898	-	gene-GTA08_BOTSDO03896(GTA08_BOTSDO03896);gene-GTA08_BOTSDO04005(GTA08_BOTSDO04005)
GO:0046914	MF	transition metal ion binding	25	35	60	788	0.237027	0.548643	gene-GTA08_BOTSDO01065(GTA08_BOTSDO01065);gene-GTA08_BOTSDO01634(GTA08_BOTSDO01634);gene-GTA08_BOTSDO01755(GTA08_BOTSDO01755);gene-GTA08_BOTSDO02023(GTA08_BOTSDO02023);gene-GTA08_BOTSDO02774(GTA08_BOTSDO02774);gene-GTA08_BOTSDO03402(GTA08_BOTSDO03402);gene-GTA08_BOTSDO03933(GTA08_BOTSDO03933);gene-GTA08_BOTSDO05313(GTA08_BOTSDO05313);gene-GTA08_BOTSDO05439(GTA08_BOTSDO05439);gene-GTA08_BOTSDO0701…	gene-GTA08_BOTSDO00371(GTA08_BOTSDO00371);gene-GTA08_BOTSDO00477(GTA08_BOTSDO00477);gene-GTA08_BOTSDO00535(GTA08_BOTSDO00535);gene-GTA08_BOTSDO01663(GTA08_BOTSDO01663);gene-GTA08_BOTSDO01670(GTA08_BOTSDO01670);gene-GTA08_BOTSDO01717(GTA08_BOTSDO01717);gene-GTA08_BOTSDO01731(GTA08_BOTSDO01731);gene-GTA08_BOTSDO01846(GTA08_BOTSDO01846);gene-GTA08_BOTSDO02095(GTA08_BOTSDO02095);gene-GTA08_BOTSDO0252…
GO:0004602	MF	glutathione peroxidase activity	1	0	1	4	0.250436	0.556337	gene-GTA08_BOTSDO01432(GTA08_BOTSDO01432)	-
GO:0005310	MF	dicarboxylic acid transmembrane transporter activity	1	0	1	4	0.250436	0.556337	gene-GTA08_BOTSDO04858(GTA08_BOTSDO04858)	-
GO:0005351	MF	carbohydrate:proton symporter activity	0	1	1	4	0.250436	0.556337	-	gene-GTA08_BOTSDO13953(GTA08_BOTSDO13953)
GO:0005402	MF	carbohydrate:cation symporter activity	0	1	1	4	0.250436	0.556337	-	gene-GTA08_BOTSDO13953(GTA08_BOTSDO13953)
GO:0008776	MF	acetate kinase activity	1	0	1	4	0.250436	0.556337	gene-GTA08_BOTSDO11135(GTA08_BOTSDO11135)	-
GO:0015144	MF	carbohydrate transmembrane transporter activity	0	1	1	4	0.250436	0.556337	-	gene-GTA08_BOTSDO13953(GTA08_BOTSDO13953)
GO:0015079	MF	potassium ion transmembrane transporter activity	0	2	2	14	0.253813	0.56008	-	gene-GTA08_BOTSDO00662(GTA08_BOTSDO00662);gene-GTA08_BOTSDO08625(GTA08_BOTSDO08625)
GO:0016835	MF	carbon-oxygen lyase activity	1	4	5	52	0.293199	0.614429	gene-GTA08_BOTSDO00408(GTA08_BOTSDO00408)	gene-GTA08_BOTSDO04355(GTA08_BOTSDO04355);gene-GTA08_BOTSDO08034(GTA08_BOTSDO08034);gene-GTA08_BOTSDO09837(GTA08_BOTSDO09837);gene-GTA08_BOTSDO11714(GTA08_BOTSDO11714)
GO:0000104	MF	succinate dehydrogenase activity	1	0	1	5	0.302574	0.614429	gene-GTA08_BOTSDO13426(GTA08_BOTSDO13426)	-
GO:0003857	MF	3-hydroxyacyl-CoA dehydrogenase activity	1	0	1	5	0.302574	0.614429	gene-GTA08_BOTSDO08520(GTA08_BOTSDO08520)	-
GO:0003871	MF	5-methyltetrahydropteroyltriglutamate-homocysteine S-methyltransferase activity	0	1	1	5	0.302574	0.614429	-	gene-GTA08_BOTSDO08260(GTA08_BOTSDO08260)
GO:0004096	MF	catalase activity	0	1	1	5	0.302574	0.614429	-	gene-GTA08_BOTSDO12189(GTA08_BOTSDO12189)
GO:0004448	MF	isocitrate dehydrogenase activity	1	0	1	5	0.302574	0.614429	gene-GTA08_BOTSDO11021(GTA08_BOTSDO11021)	-
GO:0004652	MF	polynucleotide adenylyltransferase activity	0	1	1	5	0.302574	0.614429	-	gene-GTA08_BOTSDO11445(GTA08_BOTSDO11445)
GO:0004806	MF	triglyceride lipase activity	0	1	1	5	0.302574	0.614429	-	gene-GTA08_BOTSDO00332(GTA08_BOTSDO00332)
GO:0004888	MF	transmembrane signaling receptor activity	0	1	1	5	0.302574	0.614429	-	gene-GTA08_BOTSDO04606(GTA08_BOTSDO04606)
GO:0005102	MF	signaling receptor binding	0	1	1	5	0.302574	0.614429	-	gene-GTA08_BOTSDO03596(GTA08_BOTSDO03596)
GO:0005315	MF	inorganic phosphate transmembrane transporter activity	0	1	1	5	0.302574	0.614429	-	gene-GTA08_BOTSDO05514(GTA08_BOTSDO05514)
GO:0016653	MF	oxidoreductase activity, acting on NAD(P)H, heme protein as acceptor	1	0	1	5	0.302574	0.614429	gene-GTA08_BOTSDO05439(GTA08_BOTSDO05439)	-
GO:0042085	MF	5-methyltetrahydropteroyltri-L-glutamate-dependent methyltransferase activity	0	1	1	5	0.302574	0.614429	-	gene-GTA08_BOTSDO08260(GTA08_BOTSDO08260)
GO:0016866	MF	intramolecular transferase activity	2	0	2	16	0.306825	0.619262	gene-GTA08_BOTSDO07018(GTA08_BOTSDO07018);gene-GTA08_BOTSDO11212(GTA08_BOTSDO11212)	-
GO:0046872	MF	metal ion binding	38	53	91	1246	0.311319	0.624525	gene-GTA08_BOTSDO00957(GTA08_BOTSDO00957);gene-GTA08_BOTSDO01065(GTA08_BOTSDO01065);gene-GTA08_BOTSDO01196(GTA08_BOTSDO01196);gene-GTA08_BOTSDO01634(GTA08_BOTSDO01634);gene-GTA08_BOTSDO01755(GTA08_BOTSDO01755);gene-GTA08_BOTSDO02023(GTA08_BOTSDO02023);gene-GTA08_BOTSDO02774(GTA08_BOTSDO02774);gene-GTA08_BOTSDO03402(GTA08_BOTSDO03402);gene-GTA08_BOTSDO03933(GTA08_BOTSDO03933);gene-GTA08_BOTSDO0531…	gene-GTA08_BOTSDO00110(GTA08_BOTSDO00110);gene-GTA08_BOTSDO00195(GTA08_BOTSDO00195);gene-GTA08_BOTSDO00350(GTA08_BOTSDO00350);gene-GTA08_BOTSDO00371(GTA08_BOTSDO00371);gene-GTA08_BOTSDO00477(GTA08_BOTSDO00477);gene-GTA08_BOTSDO00535(GTA08_BOTSDO00535);gene-GTA08_BOTSDO01663(GTA08_BOTSDO01663);gene-GTA08_BOTSDO01670(GTA08_BOTSDO01670);gene-GTA08_BOTSDO01717(GTA08_BOTSDO01717);gene-GTA08_BOTSDO0173…
GO:0016701	MF	oxidoreductase activity, acting on single donors with incorporation of molecular oxygen	1	3	4	41	0.31772	0.633525	gene-GTA08_BOTSDO13211(GTA08_BOTSDO13211)	gene-GTA08_BOTSDO00195(GTA08_BOTSDO00195);gene-GTA08_BOTSDO06534(GTA08_BOTSDO06534);gene-GTA08_BOTSDO13710(GTA08_BOTSDO13710)
GO:0043169	MF	cation binding	38	53	91	1255	0.339513	0.672926	gene-GTA08_BOTSDO00957(GTA08_BOTSDO00957);gene-GTA08_BOTSDO01065(GTA08_BOTSDO01065);gene-GTA08_BOTSDO01196(GTA08_BOTSDO01196);gene-GTA08_BOTSDO01634(GTA08_BOTSDO01634);gene-GTA08_BOTSDO01755(GTA08_BOTSDO01755);gene-GTA08_BOTSDO02023(GTA08_BOTSDO02023);gene-GTA08_BOTSDO02774(GTA08_BOTSDO02774);gene-GTA08_BOTSDO03402(GTA08_BOTSDO03402);gene-GTA08_BOTSDO03933(GTA08_BOTSDO03933);gene-GTA08_BOTSDO0531…	gene-GTA08_BOTSDO00110(GTA08_BOTSDO00110);gene-GTA08_BOTSDO00195(GTA08_BOTSDO00195);gene-GTA08_BOTSDO00350(GTA08_BOTSDO00350);gene-GTA08_BOTSDO00371(GTA08_BOTSDO00371);gene-GTA08_BOTSDO00477(GTA08_BOTSDO00477);gene-GTA08_BOTSDO00535(GTA08_BOTSDO00535);gene-GTA08_BOTSDO01663(GTA08_BOTSDO01663);gene-GTA08_BOTSDO01670(GTA08_BOTSDO01670);gene-GTA08_BOTSDO01717(GTA08_BOTSDO01717);gene-GTA08_BOTSDO0173…
GO:0004657	MF	proline dehydrogenase activity	1	0	1	6	0.351094	0.6836	gene-GTA08_BOTSDO06780(GTA08_BOTSDO06780)	-
GO:0033961	MF	cis-stilbene-oxide hydrolase activity	1	0	1	6	0.351094	0.6836	gene-GTA08_BOTSDO05276(GTA08_BOTSDO05276)	-
GO:0038023	MF	signaling receptor activity	0	1	1	6	0.351094	0.6836	-	gene-GTA08_BOTSDO04606(GTA08_BOTSDO04606)
GO:0016628	MF	oxidoreductase activity, acting on the CH-CH group of donors, NAD or NADP as acceptor	0	2	2	19	0.384676	0.720643	-	gene-GTA08_BOTSDO02849(GTA08_BOTSDO02849);gene-GTA08_BOTSDO09584(GTA08_BOTSDO09584)
GO:0016638	MF	oxidoreductase activity, acting on the CH-NH2 group of donors	0	2	2	19	0.384676	0.720643	-	gene-GTA08_BOTSDO01717(GTA08_BOTSDO01717);gene-GTA08_BOTSDO09755(GTA08_BOTSDO09755)
GO:0004061	MF	arylformamidase activity	0	1	1	7	0.396245	0.720643	-	gene-GTA08_BOTSDO05670(GTA08_BOTSDO05670)
GO:0004364	MF	glutathione transferase activity	1	0	1	7	0.396245	0.720643	gene-GTA08_BOTSDO01432(GTA08_BOTSDO01432)	-
GO:0004523	MF	RNA-DNA hybrid ribonuclease activity	0	1	1	7	0.396245	0.720643	-	gene-GTA08_BOTSDO04125(GTA08_BOTSDO04125)
GO:0004568	MF	chitinase activity	0	1	1	7	0.396245	0.720643	-	gene-GTA08_BOTSDO07545(GTA08_BOTSDO07545)
GO:0008496	MF	mannan endo-1,6-alpha-mannosidase activity	0	1	1	7	0.396245	0.720643	-	gene-GTA08_BOTSDO13549(GTA08_BOTSDO13549)
GO:0015662	MF	ion transmembrane transporter activity, phosphorylative mechanism	0	1	1	7	0.396245	0.720643	-	gene-GTA08_BOTSDO00110(GTA08_BOTSDO00110)
GO:0016712	MF	oxidoreductase activity, acting on paired donors, with incorporation or reduction of molecular oxygen, reduced flavin or flavoprotein as one donor, and incorporation of one atom of oxygen	1	0	1	7	0.396245	0.720643	gene-GTA08_BOTSDO05439(GTA08_BOTSDO05439)	-
GO:0016803	MF	ether hydrolase activity	1	0	1	7	0.396245	0.720643	gene-GTA08_BOTSDO05276(GTA08_BOTSDO05276)	-
GO:0016812	MF	hydrolase activity, acting on carbon-nitrogen (but not peptide) bonds, in cyclic amides	0	1	1	7	0.396245	0.720643	-	gene-GTA08_BOTSDO04401(GTA08_BOTSDO04401)
GO:0060089	MF	molecular transducer activity	0	1	1	7	0.396245	0.720643	-	gene-GTA08_BOTSDO04606(GTA08_BOTSDO04606)
GO:0004222	MF	metalloendopeptidase activity	0	2	2	20	0.409821	0.737232	-	gene-GTA08_BOTSDO01758(GTA08_BOTSDO01758);gene-GTA08_BOTSDO08012(GTA08_BOTSDO08012)
GO:0008170	MF	N-methyltransferase activity	0	2	2	20	0.409821	0.737232	-	gene-GTA08_BOTSDO01769(GTA08_BOTSDO01769);gene-GTA08_BOTSDO03221(GTA08_BOTSDO03221)
GO:0016645	MF	oxidoreductase activity, acting on the CH-NH group of donors	1	1	2	21	0.434452	0.755544	gene-GTA08_BOTSDO06780(GTA08_BOTSDO06780)	gene-GTA08_BOTSDO09511(GTA08_BOTSDO09511)
GO:0000978	MF	RNA polymerase II cis-regulatory region sequence-specific DNA binding	1	0	1	8	0.438261	0.755544	gene-GTA08_BOTSDO00957(GTA08_BOTSDO00957)	-
GO:0000987	MF	cis-regulatory region sequence-specific DNA binding	1	0	1	8	0.438261	0.755544	gene-GTA08_BOTSDO00957(GTA08_BOTSDO00957)	-
GO:0008172	MF	S-methyltransferase activity	0	1	1	8	0.438261	0.755544	-	gene-GTA08_BOTSDO08260(GTA08_BOTSDO08260)
GO:0015295	MF	solute:proton symporter activity	0	1	1	8	0.438261	0.755544	-	gene-GTA08_BOTSDO13953(GTA08_BOTSDO13953)
GO:0016679	MF	oxidoreductase activity, acting on diphenols and related substances as donors	1	0	1	8	0.438261	0.755544	gene-GTA08_BOTSDO10674(GTA08_BOTSDO10674)	-
GO:0016774	MF	phosphotransferase activity, carboxyl group as acceptor	1	0	1	8	0.438261	0.755544	gene-GTA08_BOTSDO11135(GTA08_BOTSDO11135)	-
GO:0016801	MF	hydrolase activity, acting on ether bonds	1	0	1	8	0.438261	0.755544	gene-GTA08_BOTSDO05276(GTA08_BOTSDO05276)	-
GO:0008483	MF	transaminase activity	3	1	4	49	0.446458	0.761741	gene-GTA08_BOTSDO02628(GTA08_BOTSDO02628);gene-GTA08_BOTSDO07725(GTA08_BOTSDO07725);gene-GTA08_BOTSDO08188(GTA08_BOTSDO08188)	gene-GTA08_BOTSDO11497(GTA08_BOTSDO11497)
GO:0016769	MF	transferase activity, transferring nitrogenous groups	3	1	4	49	0.446458	0.761741	gene-GTA08_BOTSDO02628(GTA08_BOTSDO02628);gene-GTA08_BOTSDO07725(GTA08_BOTSDO07725);gene-GTA08_BOTSDO08188(GTA08_BOTSDO08188)	gene-GTA08_BOTSDO11497(GTA08_BOTSDO11497)
GO:0016811	MF	hydrolase activity, acting on carbon-nitrogen (but not peptide) bonds, in linear amides	1	1	2	22	0.45852	0.770706	gene-GTA08_BOTSDO03811(GTA08_BOTSDO03811)	gene-GTA08_BOTSDO05670(GTA08_BOTSDO05670)
GO:0008238	MF	exopeptidase activity	2	3	5	65	0.475368	0.770706	gene-GTA08_BOTSDO02702(GTA08_BOTSDO02702);gene-GTA08_BOTSDO08711(GTA08_BOTSDO08711)	gene-GTA08_BOTSDO01970(GTA08_BOTSDO01970);gene-GTA08_BOTSDO02339(GTA08_BOTSDO02339);gene-GTA08_BOTSDO09127(GTA08_BOTSDO09127)
GO:0000976	MF	transcription regulatory region sequence-specific DNA binding	1	0	1	9	0.47736	0.770706	gene-GTA08_BOTSDO00957(GTA08_BOTSDO00957)	-
GO:0000977	MF	RNA polymerase II transcription regulatory region sequence-specific DNA binding	1	0	1	9	0.47736	0.770706	gene-GTA08_BOTSDO00957(GTA08_BOTSDO00957)	-
GO:0015293	MF	symporter activity	0	1	1	9	0.47736	0.770706	-	gene-GTA08_BOTSDO13953(GTA08_BOTSDO13953)
GO:0015294	MF	solute:cation symporter activity	0	1	1	9	0.47736	0.770706	-	gene-GTA08_BOTSDO13953(GTA08_BOTSDO13953)
GO:0016886	MF	ligase activity, forming phosphoric ester bonds	1	0	1	9	0.47736	0.770706	gene-GTA08_BOTSDO05153(GTA08_BOTSDO05153)	-
GO:0052692	MF	raffinose alpha-galactosidase activity	0	1	1	9	0.47736	0.770706	-	gene-GTA08_BOTSDO02303(GTA08_BOTSDO02303)
GO:0070566	MF	adenylyltransferase activity	0	1	1	9	0.47736	0.770706	-	gene-GTA08_BOTSDO11445(GTA08_BOTSDO11445)
GO:0004519	MF	endonuclease activity	1	3	4	51	0.47772	0.770706	gene-GTA08_BOTSDO07779(GTA08_BOTSDO07779)	gene-GTA08_BOTSDO03722(GTA08_BOTSDO03722);gene-GTA08_BOTSDO04125(GTA08_BOTSDO04125);gene-GTA08_BOTSDO10643(GTA08_BOTSDO10643)
GO:0043167	MF	ion binding	63	92	155	2216	0.479285	0.770706	gene-GTA08_BOTSDO00398(GTA08_BOTSDO00398);gene-GTA08_BOTSDO00957(GTA08_BOTSDO00957);gene-GTA08_BOTSDO01065(GTA08_BOTSDO01065);gene-GTA08_BOTSDO01196(GTA08_BOTSDO01196);gene-GTA08_BOTSDO01631(GTA08_BOTSDO01631);gene-GTA08_BOTSDO01634(GTA08_BOTSDO01634);gene-GTA08_BOTSDO01755(GTA08_BOTSDO01755);gene-GTA08_BOTSDO01962(GTA08_BOTSDO01962);gene-GTA08_BOTSDO02023(GTA08_BOTSDO02023);gene-GTA08_BOTSDO0230…	gene-GTA08_BOTSDO00110(GTA08_BOTSDO00110);gene-GTA08_BOTSDO00195(GTA08_BOTSDO00195);gene-GTA08_BOTSDO00341(GTA08_BOTSDO00341);gene-GTA08_BOTSDO00350(GTA08_BOTSDO00350);gene-GTA08_BOTSDO00371(GTA08_BOTSDO00371);gene-GTA08_BOTSDO00477(GTA08_BOTSDO00477);gene-GTA08_BOTSDO00535(GTA08_BOTSDO00535);gene-GTA08_BOTSDO00783(GTA08_BOTSDO00783);gene-GTA08_BOTSDO01094(GTA08_BOTSDO01094);gene-GTA08_BOTSDO0141…
GO:0015291	MF	secondary active transmembrane transporter activity	0	3	3	37	0.48011	0.770706	-	gene-GTA08_BOTSDO05514(GTA08_BOTSDO05514);gene-GTA08_BOTSDO09892(GTA08_BOTSDO09892);gene-GTA08_BOTSDO13953(GTA08_BOTSDO13953)
GO:0015926	MF	glucosidase activity	1	1	2	23	0.481982	0.770706	gene-GTA08_BOTSDO10386(GTA08_BOTSDO10386)	gene-GTA08_BOTSDO11969(GTA08_BOTSDO11969)
GO:0004559	MF	alpha-mannosidase activity	0	2	2	24	0.504808	0.794621	-	gene-GTA08_BOTSDO13549(GTA08_BOTSDO13549);gene-GTA08_BOTSDO13888(GTA08_BOTSDO13888)
GO:0015923	MF	mannosidase activity	0	2	2	24	0.504808	0.794621	-	gene-GTA08_BOTSDO13549(GTA08_BOTSDO13549);gene-GTA08_BOTSDO13888(GTA08_BOTSDO13888)
GO:0001067	MF	regulatory region nucleic acid binding	1	0	1	10	0.513743	0.794621	gene-GTA08_BOTSDO00957(GTA08_BOTSDO00957)	-
GO:0004557	MF	alpha-galactosidase activity	0	1	1	10	0.513743	0.794621	-	gene-GTA08_BOTSDO02303(GTA08_BOTSDO02303)
GO:0008810	MF	cellulase activity	0	1	1	10	0.513743	0.794621	-	gene-GTA08_BOTSDO08820(GTA08_BOTSDO08820)
GO:0016832	MF	aldehyde-lyase activity	0	1	1	10	0.513743	0.794621	-	gene-GTA08_BOTSDO02221(GTA08_BOTSDO02221)
GO:0045735	MF	nutrient reservoir activity	0	1	1	10	0.513743	0.794621	-	gene-GTA08_BOTSDO04745(GTA08_BOTSDO04745)
GO:0102483	MF	scopolin beta-glucosidase activity	1	0	1	11	0.547599	0.843048	gene-GTA08_BOTSDO10386(GTA08_BOTSDO10386)	-
GO:0016765	MF	transferase activity, transferring alkyl or aryl (other than methyl) groups	3	0	3	42	0.566871	0.868677	gene-GTA08_BOTSDO01432(GTA08_BOTSDO01432);gene-GTA08_BOTSDO09576(GTA08_BOTSDO09576);gene-GTA08_BOTSDO09620(GTA08_BOTSDO09620)	-
GO:0016853	MF	isomerase activity	3	4	7	102	0.570756	0.8706	gene-GTA08_BOTSDO07018(GTA08_BOTSDO07018);gene-GTA08_BOTSDO07501(GTA08_BOTSDO07501);gene-GTA08_BOTSDO11212(GTA08_BOTSDO11212)	gene-GTA08_BOTSDO03722(GTA08_BOTSDO03722);gene-GTA08_BOTSDO03965(GTA08_BOTSDO03965);gene-GTA08_BOTSDO09905(GTA08_BOTSDO09905);gene-GTA08_BOTSDO11300(GTA08_BOTSDO11300)
GO:0004616	MF	phosphogluconate dehydrogenase (decarboxylating) activity	0	1	1	12	0.579103	0.875265	-	gene-GTA08_BOTSDO04889(GTA08_BOTSDO04889)
GO:0030151	MF	molybdenum ion binding	0	1	1	12	0.579103	0.875265	-	gene-GTA08_BOTSDO05378(GTA08_BOTSDO05378)
GO:0008237	MF	metallopeptidase activity	0	4	4	60	0.608099	0.907595	-	gene-GTA08_BOTSDO01758(GTA08_BOTSDO01758);gene-GTA08_BOTSDO05396(GTA08_BOTSDO05396);gene-GTA08_BOTSDO08012(GTA08_BOTSDO08012);gene-GTA08_BOTSDO08892(GTA08_BOTSDO08892)
GO:0016861	MF	intramolecular oxidoreductase activity, interconverting aldoses and ketoses	0	1	1	13	0.608417	0.907595	-	gene-GTA08_BOTSDO03965(GTA08_BOTSDO03965)
GO:0008171	MF	O-methyltransferase activity	2	0	2	29	0.608719	0.907595	gene-GTA08_BOTSDO11768(GTA08_BOTSDO11768);gene-GTA08_BOTSDO13636(GTA08_BOTSDO13636)	-
GO:0008422	MF	beta-glucosidase activity	1	0	1	14	0.635694	0.943564	gene-GTA08_BOTSDO10386(GTA08_BOTSDO10386)	-
GO:0015297	MF	antiporter activity	0	1	1	15	0.661076	0.972516	-	gene-GTA08_BOTSDO09892(GTA08_BOTSDO09892)
GO:0016891	MF	endoribonuclease activity, producing 5'-phosphomonoesters	0	1	1	15	0.661076	0.972516	-	gene-GTA08_BOTSDO04125(GTA08_BOTSDO04125)
[truncated: 106 more rows]
